# Supplementary material for: Dual engagement of the nucleosomal acidic patches is essential for deposition of histone H2A.Z by SWR1C
Source: eLife. 2024 May 29;13:RP94869. doi: 10.7554/eLife.94869 (PMC11139478; doi:10.7554/eLife.94869)
Supplement: Figure 1—figure supplement 1—source data 1. [file elife-94869-fig1-figsupp1-data1.xlsx]

## Sheet: Figure 1-Fig sup 1-Panel D
time min	SWR1C AB/AB 77N0 nucleosome			SWR1Cswc5∆+ Swc5RRKR-4A AB/AB 77N0 nucleosome			SWR1C AB-apm/AB-apm 77N0 nucleosome
0	0	0		0	0		0	0
1	5.34	4.93		0	0		0	0
2.5	11.11	11.71		0	1.6		0.05	0
5	20.35	19.34		0	2.55		0	0.62
15	46.56	33.7		4.16	9.2		2.16	4.26
30	76.54	49.56		10.14	13.14		5.36	7.93
60	94.69	70.1		16.42	16.51		9.01	16.47
