# Supplementary material for: Dual engagement of the nucleosomal acidic patches is essential for deposition of histone H2A.Z by SWR1C
Source: eLife. 2024 May 29;13:RP94869. doi: 10.7554/eLife.94869 (PMC11139478; doi:10.7554/eLife.94869)
Supplement: Figure 1—figure supplement 3—source data 1. [file elife-94869-fig1-figsupp3-data1.xlsx]

## Sheet: Figure 1-Fig sup 3-Panel A
Time (s)	AB/AB-Cy5 77N0-Cy3 amppnp						AB/AB-Cy5 77N0-Cy3 atp
0	87.8061	90.5387	82.4526	97.7266	93.6803	89.0629	96.264	91.6053	95.906	89.6892	96.5729	79.7563
3.647	88.5896	96.6953	98.006	100	92.3935	95.5757	100	99.0427	93.8211	94.8693	90.0256	93.2972
6.859	87.904	94.8393	80.3589	89.9491	93.8805	91.8934	97.2291	91.7526	100	96.1026	92.0205	85.3758
10.027	84.8678	95.292	90.9272	88.6629	92.7652	99.4504	87.4222	90.3166	93.1766	96.5466	98.4143	98.0366
13.217	86.4349	87.234	90.5284	91.4149	87.3606	98.8733	90.9402	100	89.8029	99.3093	89.7187	81.9228
16.393	86.8266	89.2259	93.2203	96.8591	92.9654	92.6628	99.8755	91.053	82.3351	96.9413	98.4143	100
19.561	90.8913	92.5758	87.5374	89.3509	86.7315	97.2245	86.2391	87.7025	93.4041	86.1371	91.7136	87.3392
22.749	84.427	85.0611	79.3619	93.0601	96.3111	91.3987	86.924	89.5803	96.4367	95.8559	100	86.1882
25.923	89.618	100	95.3639	88.1843	95.8822	95.823	80.1993	92.4153	88.514	95.2146	96.7263	88.761
29.118	89.5201	84.201	92.5224	95.3934	100	92.3331	88.1382	87.6289	88.0212	89.9852	98.7212	90.9276
32.303	83.4966	89.6333	92.7717	90.2483	96.1395	89.6125	83.9352	91.9367	91.4708	91.9586	94.0153	85.5789
35.566	88.8834	86.555	79.9601	80.4966	88.1899	90.2171	83.5928	86.3402	88.931	89.2945	91.6624	79.7563
38.753	84.7209	86.2381	93.8684	90.5474	95.4818	94.9711	83.9041	88.1443	93.4799	87.2718	84.9616	92.4848
41.926	88.0999	94.0697	98.006	82.411	94.2522	90.0247	78.0511	91.1635	84.7991	97.2373	90.3325	77.7251
45.112	81.9785	84.4726	84.2473	91.1158	98.2271	94.9162	81.4134	80.486	83.624	100	93.913	83.48
48.325	90.0588	86.6003	95.4636	97.6668	94.7955	91.3713	79.1719	78.0928	89.5375	87.5678	96.1125	84.4279
51.501	81.9785	92.4853	89.681	90.8465	95.968	87.3317	77.8954	82.5847	82.373	79.6744	84.6036	73.1212
54.665	85.5044	86.1023	91.7248	93.5687	94.8813	88.3759	85.5542	85.1252	83.4344	90.9719	97.5959	71.564
57.877	89.2752	90.8103	91.8744	91.1756	88.9906	98.5985	73.1631	77.7982	76.8006	73.4583	97.5448	85.1726
61.055	100	83.2956	92.9711	89.1116	89.6483	93.2949	75.467	89.3594	83.6998	97.9773	91.4578	90.2505
64.237	86.5328	87.732	85.1944	91.4448	85.9022	90.4644	78.9539	75.81	78.3169	78.1944	98.7724	84.9018
67.417	85.3085	88.3658	100	89.5902	94.2808	99.5878	71.8867	74.8159	80.4018	79.8224	93.4527	83.954
70.633	90.2547	88.3658	92.672	91.2952	93.7375	85.1333	69.2403	73.38	77.0281	88.5052	91.1509	79.824
73.836	89.2752	89.9955	85.1944	84.0263	92.851	88.0187	72.5716	82.732	82.1077	81.8451	98.0051	80.0948
77.048	82.2723	85.0158	89.1825	89.8594	95.1101	98.5985	75.9963	69.1458	74.9431	83.0784	93.3504	85.6466
80.237	83.0558	86.9172	90.0798	84.2955	94.2236	91.8659	81.7248	72.7909	81.0842	82.9798	94.6803	80.0271
83.431	86.5818	87.234	81.8046	93.12	93.2514	93.1025	70.0187	72.2386	89.1964	82.1411	78.2097	92.2817
86.611	89.569	89.3164	84.4965	86.4493	97.3978	89.3103	77.8954	80.0074	76.6111	78.3424	93.5038	86.0528
89.809	84.5739	87.3246	84.1974	92.0132	91.9645	95.7681	73.8792	72.4963	76.9522	88.6038	87.4169	83.6154
92.977	90.1567	91.1272	87.8365	92.3123	98.942	90.2995	65.6289	78.7923	78.2411	83.8185	88.8491	90.0474
96.174	89.716	88.5921	88.3848	87.1971	87.1032	92.388	75.3425	79.6392	78.8097	73.3103	87.0588	76.5741
99.379	91.2341	93.8886	91.0269	77.2958	88.5044	93.7345	68.4309	73.38	77.7104	73.3103	84.1432	84.4956
102.581	86.6797	96.3332	94.7657	83.8768	86.6743	86.5897	71.8867	78.9396	83.3965	75.037	86.6496	88.2871
105.775	93.8296	79.9004	84.7956	82.6204	89.0192	89.8324	67.8394	81.7378	70.0531	85.5451	77.7494	71.6317
108.953	96.8658	84.4273	89.1326	85.5519	93.4801	95.0811	72.4471	69.1826	73.1236	79.5757	78.2097	80.501
112.123	88.5406	82.8429	81.3061	87.1971	94.5954	100	71.5442	69.6244	77.8999	83.1278	88.3887	75.6263
115.307	93.7316	84.7895	87.5872	88.7227	90.0486	94.1193	65.5355	63.218	73.0099	89.3439	85.8312	82.9384
118.478	92.2625	85.1517	88.5344	87.4663	90.7921	88.3484	69.863	69.8822	75.398	78.9344	78.4655	68.0433
121.675	90.6954	76.1883	83.8983	89.9192	85.1873	95.7681	60.8032	73.7113	66.8688	83.6704	86.9565	75.4232
124.836	88.1489	88.411	89.4317	87.9749	87.4464	91.6461	73.1009	67.1944	68.9917	76.5664	81.3811	70.2776
128.045	86.7777	78.6781	89.1326	84.2357	82.6995	89.3927	65.5044	70.4345	77.8999	72.669	80.3069	78.3345
131.221	85.5534	88.23	81.9541	81.3042	86.7315	90.7117	66.3761	71.9809	69.8256	85.5945	81.5345	72.9858
134.414	80.8521	94.3866	89.1825	92.6713	90.02	90.9316	66.6252	67.7467	73.6164	76.8624	77.8005	78.8761
137.599	84.6229	88.7279	91.5753	82.7999	89.0478	82.4677	68.4932	66.6789	72.555	84.3118	79.9488	77.3189
140.79	92.9971	86.9172	80.01	83.3981	93.7947	88.1561	65.1308	72.6804	75.4738	78.8357	88.0818	74.6784
143.971	89.0304	87.4604	85.4935	92.8806	91.0781	88.1286	70.6725	66.1267	72.138	77.6517	82.2506	83.48
147.151	85.2106	88.6374	93.2702	86.5989	84.1864	85.573	66.9365	67.5994	71.4177	73.6556	89.821	82.7353
150.318	94.9559	86.7361	85.3938	87.8851	92.2791	89.008	60.8655	64.9485	69.1433	85.6931	82.0972	88.8964
153.489	89.1773	89.7239	84.2971	85.4921	88.0755	91.2339	65.1619	64.433	66.4519	78.0957	86.7008	83.5477
156.665	93.3888	85.3327	90.4786	86.4194	84.5868	91.9758	67.3101	60.3461	67.8165	90.7745	81.2276	85.5789
159.951	91.332	87.732	86.989	86.6288	86.4169	88.266	75.1557	68.2622	63.4572	82.7824	87.6726	76.1002
163.117	84.3781	85.4685	84.3968	87.4065	88.9906	91.5636	65.9402	64.3962	73.2373	74.6917	87.8261	80.5687
166.279	86.9246	91.8062	88.7338	81.6632	89.6197	84.9959	60.3051	60.8984	62.7748	77.849	82.8133	81.0427
169.51	84.8188	87.0982	89.3819	81.9025	92.7652	90.382	66.2204	62.592	60.5762	69.0183	82.3018	74.8815
172.694	80.7542	82.8429	88.3848	89.4406	87.2748	81.6708	63.1071	61.782	59.856	80.6117	80.2558	67.2986
175.864	97.2086	81.1227	97.3081	85.7912	91.8216	83.6768	69.4271	61.4138	63.9121	78.737	73.555	75.0846
179.032	88.7855	88.8185	88.4347	95.7523	91.8788	91.4537	64.8506	66.0162	68.2335	73.261	74.1176	78.7407
182.222	84.525	94.2961	82.7517	91.9533	91.9931	88.7057	61.2702	63.5493	64.5186	77.2077	85.1151	81.7197
185.411	78.7953	83.3409	82.652	89.6799	83.3286	91.6186	65.9091	61.3034	65.5042	75.3823	77.954	74.3399
188.639	90.2057	86.1476	81.3061	87.8253	92.0217	90.7117	62.1731	60.1988	60.3108	76.073	80.1023	76.845
191.811	85.3085	89.1354	90.4287	86.4493	88.676	87.1118	60.8966	58.0633	59.6664	82.2891	73.6061	71.0223
194.994	90.3526	95.79	95.4138	84.6545	87.2748	90.9316	60.5542	56.0383	66.9826	78.0464	82.2506	72.8504
198.166	82.1254	86.7813	94.1176	81.723	86.6457	89.8599	57.5965	63.6966	58.9462	75.481	75.8056	75.8294
201.397	81.1459	80.4889	92.8714	82.3811	84.787	92.8552	56.5068	64.838	66.1486	81.1544	75.5499	75.8294
204.597	77.4241	84.5179	92.9711	90.2782	91.1639	84.2264	56.7248	54.6392	61.5618	75.9743	77.0844	72.7827
207.794	95.7884	88.5469	87.5374	94.9746	86.4455	90.9041	63.6675	56.8851	60.7657	81.7958	81.6368	65.6737
210.993	92.6543	83.6125	90.7278	92.4619	91.5928	88.7332	59.2466	60.8984	61.6376	74.6917	72.532	70.0745
214.175	82.3702	95.1109	79.4616	76.548	89.3623	84.144	61.7995	57.1429	63.0023	74.297	82.6598	74.0014
217.379	83.2517	75.7356	75.5234	85.8211	88.9048	90.382	57.3786	60.4934	63.2676	71.1396	75.7033	67.2309
220.578	91.6748	90.1766	80.9073	81.4239	91.3068	91.756	62.9826	61.8189	59.818	78.737	75.0895	64.455
223.8	90.0098	89.0901	84.2473	83.4879	93.4515	91.9483	57.5965	55.6701	58.8324	71.5836	76.0614	81.652
226.982	93.9765	92.1231	90.3789	83.3084	97.1976	86.9195	61.3014	57.5847	62.3958	70.8436	73.913	70.8869
230.175	99.4123	78.9498	96.6102	85.4921	85.9594	85.0234	56.6002	55.3387	58.605	65.1702	68.5934	74.7461
233.366	88.2958	81.6206	98.3051	81.0948	87.7609	95.823	56.1955	58.3211	54.4731	70.4489	76.8286	71.2932
236.546	88.002	79.8551	89.5813	86.8382	88.4758	85.573	52.4595	58.6892	66.4898	73.6063	73.5038	73.5951
239.712	85.3085	93.1643	92.9212	78.0437	87.7037	84.8585	59.589	60.0147	63.0781	77.0597	68.491	69.3297
242.896	93.1929	81.7112	89.5314	80.0179	82.1275	94.8612	57.8456	58.4315	61.903	67.2916	76.8286	70.8192
246.079	88.0509	79.9004	91.8744	85.6117	90.5061	91.756	56.4757	55.3387	58.8704	75.185	70.8951	62.4238
249.254	84.6229	80.9869	84.1476	89.0817	93.1084	86.2325	58.4371	57.327	63.7604	77.405	80.4092	65.1997
252.438	84.3781	83.4767	83.2004	88.4236	86.9603	98.6535	54.0785	66.2003	54.5868	72.1756	70.6394	67.8402
255.616	79.1871	82.5713	85.2443	80.4367	89.4481	84.9134	59.3711	55.4492	62.0167	78.4904	78.7212	74.0014
258.811	86.6797	87.5509	84.995	86.21	84.4152	89.8873	55.0125	57.2533	58.2259	72.965	64.1432	64.9289
262.005	89.667	86.7813	87.8863	81.8127	83.3286	90.7667	53.1445	61.7084	63.2297	62.4075	75.8056	70.4807
265.229	78.7463	82.2544	83.4497	83.6375	91.2782	87.8538	58.9975	54.5287	61.3723	78.3424	68.3887	71.2932
268.416	88.1978	83.1145	86.8395	79.3898	84.9585	95.9055	55.1681	56.7747	61.4481	75.4317	74.5269	68.0433
271.594	88.4427	85.9665	83.5992	78.8513	86.4169	93.13	52.4595	56.0751	54.9659	75.629	74.1176	62.5592
274.768	87.0225	82.9335	89.0828	79.9282	84.5582	85.0234	57.1918	62.5552	57.771	70.2516	61.3811	67.0955
277.952	88.2958	89.1354	76.67	83.2187	88.6474	92.388	56.6936	58.4683	61.903	75.9743	72.8389	64.8612
281.118	92.5563	86.7813	95.8624	84.8938	92.3649	92.0308	58.0012	54.3446	55.4966	69.2156	70.8951	59.9188
284.321	80.2155	83.2503	90.9272	81.1547	85.1015	87.2218	52.9888	54.5287	55.6861	67.5876	71.0997	67.6371
287.496	90.8423	79.6741	89.5813	80.7359	84.7298	85.4905	59.9004	58.5052	56.0273	71.3863	76.7263	54.7732
290.674	74.3879	83.9294	84.3968	88.8723	83.0712	91.014	54.5455	58.9838	60.8795	53.7741	70.6394	66.4861
293.855	76.9344	93.2096	88.9332	80.6162	84.5296	85.8203	58.2192	53.9396	58.9841	68.2289	66.1381	70.1422
297.032	86.6308	84.9706	85.0449	84.7143	90.306	91.3987	52.3973	55.2651	59.2873	66.8969	64.6036	67.8402
300.257	84.2801	83.4767	90.3789	82.5606	84.4724	93.1849	60.9589	53.9028	52.3503	65.0222	71.202	66.8246
303.477	90.9403	85.5138	92.323	79.6889	84.2436	84.6386	49.7509	52.6141	56.1789	60.4341	64.8082	63.2363
306.644	86.7777	87.2793	90.8275	84.5049	87.5322	89.1179	53.1133	57.3638	61.5618	70.2023	70.4859	64.5904
309.818	85.0637	78.7687	92.1236	76.2788	86.4741	85.7653	50.7783	49.0059	57.2782	61.4208	71.7647	65.2674
313.001	83.3986	82.6618	84.7956	82.7999	90.9351	88.1836	61.1146	52.8719	61.2585	64.2329	73.8619	66.4861
316.164	76.1019	82.8429	81.0568	81.1547	81.9274	89.9973	55.7285	51.3991	59.3252	62.0622	77.6982	56.2627
319.329	84.1332	82.2997	94.8654	81.6632	82.2133	89.3652	56.9427	53.2032	51.2889	60.2368	75.2941	67.9079
322.497	84.2311	83.2503	92.8215	76.9369	87.2176	90.8766	54.2653	56.1856	54.7005	63.5915	67.7238	60.6635
325.668	74.8286	90.5387	88.9332	84.3853	81.0981	87.4966	51.6189	51.1782	58.0364	64.1835	66.2916	62.4238
328.85	81.9785	86.1476	88.7836	85.7015	89.3051	92.2506	57.939	48.8218	58.7187	59.3488	73.555	64.3196
332.048	73.4574	81.349	81.4058	86.3596	75.4075	92.0033	55.2927	56.1856	56.2168	65.5155	71.7136	68.8558
335.231	78.9422	79.3572	88.1854	83.4879	86.7029	88.1561	54.0162	61.5611	53.9803	65.3675	69.2583	73.3243
338.44	80.0686	83.6578	92.8714	80.7359	87.3606	87.4141	54.2964	53.866	56.5959	66.7982	64.8593	62.2884
341.617	79.8727	77.6822	98.5045	78.5821	86.4455	87.579	47.5093	51.1782	54.5489	66.0089	63.4271	63.1686
344.79	88.6876	84.2463	94.2173	84.0562	83.7861	85.1608	55.7908	56.8851	51.3647	65.8115	66.8031	67.7725
348.005	78.0607	87.0077	94.1176	82.1119	88.5902	88.8431	46.5442	54.9705	54.2077	65.8115	61.8926	65.7414
351.189	83.8883	94.0697	88.7836	85.5519	83.3572	84.8585	49.9066	56.1487	55.1933	61.6182	69.1049	66.4861
354.357	93.7316	77.139	86.5404	78.6719	85.6448	81.3135	48.9415	56.6274	60.8036	65.7622	66.1893	60.9343
357.528	79.4809	84.0652	84.7956	86.5091	80.2974	83.7593	50.4047	50.7732	52.8431	70.0543	64.9105	61.8822
360.714	74.2899	79.0856	83.9482	81.7529	85.9308	94.8612	50	46.539	51.7058	60.9768	65.8824	62.2884
363.886	83.4966	81.6659	84.4965	84.2955	81.9846	93.5697	49.5641	50.2946	57.2782	58.1154	74.6292	55.4502
367.126	86.4838	90.584	76.5703	78.2531	89.1907	84.3638	53.0199	53.866	56.2547	69.3636	58.4655	64.5227
370.317	90.6954	82.9335	86.989	72.8986	82.6423	92.8002	55.0436	54.0869	58.188	58.5594	65.2685	68.3819
373.485	83.6925	82.7524	78.9631	79.1804	86.3597	87.4416	52.0859	60.4566	59.1736	63.7889	71.9693	59.3094
376.654	83.4476	84.2915	91.675	83.2187	93.4229	89.3927	53.1445	52.5037	58.4155	62.1608	60.0512	60.1219
379.831	80.8031	77.2748	85.3938	87.3168	79.8685	86.6996	55.604	46.2077	53.26	60.7795	66.1893	59.1063
383.014	87.1694	88.4563	79.2124	78.9112	81.4698	91.2064	51.1519	51.2518	52.4261	61.7662	68.9003	56.872
386.194	82.1743	80.3984	87.3878	82.77	86.2739	88.266	46.7621	52.8351	55.1933	52.4914	66.7008	65.4705
389.354	80.2155	80.9869	87.7866	83.6674	88.533	89.0629	52.6463	58.7629	55.6103	60.8288	60.8184	59.9865
392.557	82.2723	88.1394	85.7428	81.3341	88.3329	88.6232	48.4745	47.9381	51.8575	65.3675	64.2455	55.3825
395.731	80.95	84.0199	82.7517	86.9877	80.7549	82.4952	54.1719	57.5479	59.2115	62.2102	62.0972	57.9553
398.938	75.808	82.6166	94.2173	86.3596	81.4412	91.1789	51.1208	51.3991	53.1084	66.4036	61.8414	62.9655
402.114	85.5534	87.3699	80.8076	79.8086	87.9897	89.3652	53.5181	50.6996	52.4261	57.6221	69.8721	59.5125
405.321	77.1792	86.9172	79.9601	79.7188	77.2948	87.2492	48.8169	50.5523	58.1122	61.6182	66.087	57.0074
408.515	88.1978	92.3042	87.7866	77.2958	85.9594	89.7774	51.1831	52.8351	50.7961	59.5461	70.2813	52.4035
411.701	85.4065	86.2834	78.4646	83.9366	83.0998	87.1943	48.7235	59.6834	54.4731	55.8954	65.7289	62.3561
414.877	87.2674	87.9131	84.6461	84.5049	88.0469	85.4356	51.5878	49.0427	51.3647	63.8875	65.1151	55.7211
418.111	91.43	76.3241	93.1705	82.9195	86.3597	88.8156	54.7011	53.056	53.9803	64.7755	64.7059	64.7258
421.327	79.5299	77.3653	93.2203	77.2659	82.4421	88.6782	51.3076	48.9691	54.7763	59.6448	59.5908	62.4238
424.536	86.7777	88.5921	81.5553	76.907	88.8762	92.388	46.7621	54.9705	52.5398	53.7741	63.2737	51.6588
427.701	82.2723	86.6455	80.8574	77.7445	93.0798	77.1366	49.6264	47.0545	50.1137	63.2955	59.8977	64.3873
430.899	86.3859	83.522	84.7458	78.9411	85.9022	87.1943	46.8244	56.5538	51.5921	64.2822	61.9437	63.5071
434.087	84.1332	84.0199	85.2443	82.9794	79.2393	89.008	54.6389	45.324	55.8757	58.5101	57.3402	60.2573
437.286	86.4349	79.3119	83.3001	78.6719	88.4472	84.776	51.3699	54.0133	50.4928	55.1554	60.9719	69.1266
440.495	89.569	75.3735	82.2034	81.0649	79.5539	89.7225	48.599	53.4242	55.9894	57.0301	67.3657	61.6114
443.685	83.4966	78.1802	82.3031	84.5947	83.014	90.4644	48.8792	50.6627	53.0326	63.8875	63.2225	44.8206
446.866	90.5485	80.0815	77.1685	79.659	89.2193	84.3638	48.9415	54.6392	51.7058	61.6675	66.3939	54.7055
450.062	91.381	77.8633	91.4257	81.1247	79.6397	85.7378	47.9452	46.2813	56.8992	62.2102	67.0077	58.2938
453.245	85.7003	85.0611	83.001	81.9025	80.8407	83.0723	47.4159	47.2754	49.8863	62.0128	56.8286	59.851
456.444	83.0069	84.9706	91.9242	84.0263	82.7566	81.6983	50.5604	51.7305	61.8271	58.6088	65.2174	60.0542
459.66	79.8727	86.6455	92.1735	80.4068	82.5279	84.0616	47.6339	44.6981	49.2418	61.3222	65.9847	62.7624
462.844	81.3418	83.0693	85.7428	83.2785	83.3858	86.6172	47.2603	45.7658	46.4367	55.5007	56.5217	57.9553
466.018	80.8031	85.876	93.5693	80.8854	79.5253	87.1118	49.5641	48.9691	51.8954	61.6675	60.9719	60.2573
469.229	83.2517	81.9828	88.7338	80.7957	84.0721	83.8142	50.4981	48.0486	54.094	62.6542	60.5115	58.9032
472.434	86.5328	82.2091	94.2173	75.4412	82.2133	88.3484	42.0299	50.4786	51.8954	52.294	66.7519	56.8043
475.608	83.4476	77.8633	93.6191	69.4287	83.0426	88.321	46.8555	54.676	52.8431	56.5368	66.5473	58.2261
478.78	84.8188	88.411	81.4556	83.9665	81.0409	88.1286	48.6301	47.4963	50.0758	51.702	60.1023	48.7475
481.965	79.4809	79.0856	86.1416	79.0906	83.6717	83.9516	45.1121	51.5832	51.7058	60.5821	58.9258	57.5491
485.141	89.0304	83.4314	80.5085	77.1762	84.4152	89.3927	53.4869	51.5096	54.7763	61.7662	55.7545	52.4035
488.303	78.4525	83.0693	86.2413	73.4071	84.9871	85.4905	44.3649	56.7378	50.417	58.4608	61.2276	57.7522
491.491	75.2693	81.4396	77.6171	78.1633	83.2142	85.4081	48.8481	49.3004	53.9803	53.626	70.2302	63.1686
494.693	77.8648	78.7687	87.4377	81.4239	84.4152	81.6708	47.7273	46.0236	50.3791	58.3128	58.6189	55.5179
497.893	79.7258	91.6704	82.9511	83.099	84.7012	79.8846	47.4782	56.8115	53.4117	57.1781	54.3223	59.851
501.117	68.7071	85.5591	95.9621	76.0096	77.8953	83.0998	46.0461	46.5022	51.5921	56.1914	64.7059	66.2153
504.329	91.381	83.703	88.8335	76.0096	83.5859	90.6568	52.5841	54.5655	51.5163	63.1968	63.0179	55.3148
507.536	71.2047	81.349	78.0658	86.0305	75.6935	81.9456	44.9564	48.0486	53.6391	58.5101	60.9719	54.9763
510.725	80.6072	76.5052	86.1416	78.971	86.1024	87.7714	51.7123	47.9381	54.5489	52.3927	55.9591	53.9607
513.912	87.1694	82.2997	80.6082	77.595	75.0929	83.7868	51.4944	46.8336	54.3973	60.3355	56.5729	52.8097
517.082	85.2106	75.962	82.8016	76.9967	83.0712	88.0736	48.2565	51.7673	46.6641	55.6981	59.6419	53.3514
520.275	81.6846	68.7641	83.4497	73.8857	82.1847	85.3531	44.9875	52.0619	52.6535	49.9753	58.4143	54.367
523.476	78.3056	83.1145	92.4726	77.7445	79.7827	84.144	49.8132	52.5405	55.6103	50.7647	60.8696	62.8301
526.668	82.762	76.5957	86.9392	78.9112	72.0618	84.6386	50.3736	49.9632	55.1933	56.8821	59.8465	62.153
529.852	78.0118	73.3364	78.664	75.1122	76.294	83.7593	50.1557	51.2887	52.6535	51.8007	64.6036	61.476
533.039	87.1205	84.6084	82.004	81.723	82.1847	84.5837	56.0399	49.7423	53.6012	56.3888	64.0409	52.8097
536.222	79.383	81.0774	85.7428	84.6545	82.5851	87.0844	49.0037	48.6745	55.6861	59.0035	59.0793	54.2316
539.399	93.046	78.6781	91.5254	80.0479	89.0478	81.2036	53.6115	46.5758	49.4314	61.4702	63.1202	50.5078
542.582	81.048	86.8266	81.2562	81.364	82.9854	84.6936	50.934	43.0412	50.1895	53.7741	61.0742	58.8355
545.751	88.2958	79.6288	87.986	78.4325	84.9299	80.3243	47.1357	50.1105	46.74	61.6182	55.601	60.2573
548.92	85.6024	89.0448	91.4257	80.4367	82.3849	83.5669	48.5056	53.7923	47.7255	59.1515	61.9949	50.8463
552.078	86.288	75.6451	86.6899	78.4625	84.3866	80.0495	48.9726	55.5965	50.4549	51.11	57.1355	59.174
555.253	85.5534	80.5342	89.8804	76.9967	86.1882	84.5287	49.6887	48.4904	52.2365	52.0474	57.0332	59.9188
558.469	83.0558	77.8633	81.1067	77.5351	83.014	84.0616	46.264	50.4786	54.3215	53.1327	69.8721	54.1638
561.673	83.5945	73.8796	78.7637	81.2444	84.5868	82.1379	48.6301	49.19	53.8287	57.3261	62.711	52.3358
564.927	80.95	73.8796	89.2822	76.2489	91.6786	86.947	43.8667	41.2371	50.2654	57.5234	67.8261	64.9966
568.122	83.4966	79.3119	80.4586	85.163	85.1873	77.8236	41.4072	49.8527	51.5921	58.4114	59.0281	60.7989
571.312	80.2644	75.464	84.1476	75.9797	85.6734	81.8082	49.6887	48.2327	47.4981	58.1154	62.0972	49.4922
574.482	75.808	80.8511	83.6989	82.5007	88.0755	87.3317	51.2453	52.3564	51.0235	58.3128	53.8107	52.4035
577.667	75.5632	81.2132	79.0628	76.1292	83.8147	80.654	45.33	51.9146	51.5542	53.3794	59.5908	56.3981
580.918	81.048	75.962	80.658	75.0523	82.5851	81.4509	47.2603	52.025	51.0614	51.3567	59.8977	55.9919
584.103	72.8208	78.9498	78.9133	78.6719	80.7835	83.0723	45.0498	49.2268	47.953	52.3927	60.5115	61.0697
587.34	82.4682	72.5668	84.4467	72.8388	82.6423	78.7579	44.2403	48.4168	49.6588	56.2901	57.3913	63.1686
590.513	82.4682	79.493	87.5872	76.6078	85.4733	83.0723	51.7435	45.1399	48.2942	62.5555	59.8465	56.3981
593.707	81.8805	78.3612	83.8983	75.6506	81.2125	82.3853	42.061	47.9381	48.3321	59.7928	60.3581	57.2106
596.941	77.7179	69.7601	80.4586	74.6934	75.8364	83.0998	49.7821	45.0663	53.7528	54.8101	62.1483	55.3148
600.12	83.5945	78.3612	82.9013	76.0694	79.8399	83.0448	49.4396	53.7923	57.6573	64.6769	57.4425	50.1016
603.315	80.6072	78.4518	86.7398	73.5567	79.125	78.7304	47.3537	49.7791	48.2563	52.3434	65.2685	58.9709
606.483	74.9265	85.1064	88.5344	68.4116	78.696	81.7532	48.1009	49.4477	52.6156	55.2047	63.6829	63.7779
609.696	84.427	80.5342	82.8016	82.2614	78.5244	78.0709	41.1893	49.6318	54.6247	51.406	59.2327	51.9973
612.876	80.999	91.1725	81.7049	76.0395	82.6137	81.341	50.9651	49.595	53.1842	54.7607	58.977	57.4814
616.051	87.4633	75.8714	76.3709	73.2875	79.8113	78.4007	47.7584	51.8041	48.0667	54.2181	58.0563	54.2316
619.235	80.6072	83.6578	81.1067	77.1762	75.4075	82.9349	48.5679	48.5641	52.5019	50.7647	55.7545	51.5234
622.422	73.8981	88.7279	83.35	71.0739	83.5573	79.3899	47.1669	49.7791	49.0523	52.9354	58.5166	53.7576
625.605	77.9138	74.8755	89.4317	76.6976	75.9794	79.7197	42.5592	48.3432	45.6406	53.6754	62.9156	55.3148
628.787	80.0196	78.7687	85.6431	78.5821	77.7238	84.7486	47.6961	56.0751	47.8393	60.0395	56.5217	48.4766
631.967	80.8521	83.1145	78.5145	78.612	83.1856	85.6554	48.2877	49.6686	53.677	58.7568	56.624	53.1483
635.137	79.0891	77.2748	80.658	76.4882	88.39	80.1044	45.0809	52.0987	51.5163	49.334	48.5934	53.893
638.32	79.0402	81.3038	86.4905	76.2489	73.3772	86.4523	45.5791	46.7231	45.906	55.9941	61.9437	52.4712
641.511	77.1792	83.4767	90.8275	82.7401	82.6709	82.5776	49.4085	50.4418	53.1084	55.3034	54.7826	49.4922
644.682	77.9138	79.6741	81.655	80.4966	82.3849	79.4724	47.6961	40.8321	47.3465	56.5368	69.8721	66.0122
647.852	75.7591	83.6578	86.9392	76.3984	78.1241	85.6829	45.3923	43.299	48.4458	52.0474	57.289	53.6899
651.048	84.5739	82.6166	81.655	73.4969	72.2905	78.8953	47.3537	51.0677	51.6679	53.5767	56.6752	51.4557
654.25	69.7845	75.0113	73.4297	73.7063	72.6051	78.1808	49.4085	49.6318	52.3124	55.2047	51.7136	49.1537
657.441	80.999	80.172	91.7248	73.4071	81.0123	80.5166	48.2254	48.1591	46.0197	54.7114	57.2379	44.4144
660.613	84.5739	75.3282	85.5932	77.4753	77.6952	73.729	46.5753	49.4845	49.9242	55.3034	51.509	57.2106
663.824	79.8237	74.5134	70.6381	79.2402	71.5184	79.9945	49.1283	46.539	50.417	55.2541	59.1816	53.0806
666.994	86.9246	78.7687	76.5703	73.2875	85.845	81.4509	47.3848	51.8409	45.489	55.3527	57.7494	55.4502
670.178	79.7747	76.6863	89.9302	79.2701	79.5539	76.3397	44.6762	46.5758	48.5974	57.0794	61.688	57.5491
673.358	77.4241	76.3694	73.8285	70.1466	79.8971	76.6694	47.3537	48.6009	47.3844	53.9221	54.9361	59.0386
676.526	79.8727	78.1349	82.004	71.1038	77.3234	85.4905	49.8132	47.4595	46.8158	46.818	53.7596	49.4245
679.703	85.2106	71.3898	78.2652	81.8127	77.209	77.0267	47.7895	45.0663	46.8916	61.4702	61.8414	57.4814
682.868	78.2076	76.9579	75.8724	77.4454	78.8962	79.2525	48.3188	50.6259	53.6391	57.9674	57.3913	55.5179
686.042	72.9187	70.6202	80.658	76.8771	85.8164	76.8068	50.5604	52.2459	48.9386	55.5994	51.509	55.7211
689.255	69.001	73.5627	83.35	78.7616	82.6423	75.3504	44.6139	50.1105	47.2328	51.85	49.2072	59.9188
692.46	75.0245	79.6741	77.7667	76.0694	71.1181	77.4663	46.5753	48.2327	48.2563	53.33	52.4297	59.5802
695.631	73.8002	79.2666	78.7637	76.4583	73.3772	80.4891	51.3387	43.0781	49.0523	52.146	56.8798	46.8517
698.814	79.8727	71.435	77.5673	80.676	77.4378	76.5045	43.68	52.3932	49.583	53.1327	54.1688	56.0596
701.977	81.9295	74.8302	88.8335	76.7574	76.6371	82.7975	43.929	45.6554	45.6406	55.4021	55.5499	50.237
705.184	83.4476	78.0896	83.3001	75.501	72.7481	85.8478	43.929	45.324	53.1463	52.3434	54.8849	55.7888
708.358	73.4084	86.4192	74.0778	72.8089	76.9231	77.9335	43.1196	51.0309	44.3897	49.9753	56.5217	49.2214
711.559	81.2929	78.2707	80.5085	77.2659	78.0383	73.4268	46.5442	49.3741	50.7961	54.1194	56.0614	45.3622
714.737	73.2615	72.0688	75.9222	79.0009	71.8902	82.1379	45.8904	49.3373	50.1516	54.4647	57.0844	55.4502
717.907	75.2693	78.4971	90.0798	71.9414	78.553	85.3531	46.7621	45.7658	51.8954	51.8994	52.3785	48.1381
721.081	77.8648	84.1557	85.6929	81.0649	75.1787	82.6326	49.8132	51.4359	43.9727	58.2141	53.7084	63.0332
724.314	79.8727	75.5545	80.9571	72.1208	77.3234	76.3122	41.2827	46.9072	52.0849	54.6127	57.8005	52.2681
727.48	76.2488	71.1634	84.8953	74.4541	75.6649	73.2894	44.9564	48.9691	44.5792	49.8273	61.1253	53.6222
730.651	80.6072	75.5998	82.1535	74.5737	74.2065	78.2083	41.5629	48.6377	54.4352	54.3661	59.5396	43.8727
733.82	95.4946	80.4436	77.2183	72.6593	76.0938	79.0327	45.2989	48.6377	45.7544	59.2008	58.1074	47.258
737.019	82.6641	80.5794	82.9511	73.7063	74.7784	79.8846	47.0423	39.7275	53.9045	57.1781	48.9003	47.5965
740.189	79.0402	82.8882	75.3739	72.1807	76.3226	78.6755	41.812	45.8763	49.1281	52.4914	58.7724	56.5335
743.373	85.9452	83.024	87.6371	75.501	77.0661	75.7626	44.8319	44.1458	47.536	49.6793	58.8747	55.5179
746.539	71.1068	76.7316	83.5992	75.6805	68.3729	76.2023	41.9054	50.0736	47.2328	56.1914	53.8619	62.3561
749.72	80.8521	82.1186	81.4058	82.2016	81.1267	75.0481	41.2516	47.3122	43.7832	60.0395	52.2762	55.9919
752.891	74.8286	80.8963	76.2213	78.7616	72.5193	75.5427	42.6526	49.8895	49.4314	54.1194	56.2148	58.2261
756.071	87.904	78.0896	84.3968	76.0993	74.6068	83.5394	43.7422	50.7364	50.834	56.3394	59.4885	50.237
759.245	72.429	80.67	74.4267	75.9198	75.9794	78.1533	43.3375	46.539	51.4026	57.0301	54.0665	47.3257
762.442	78.6974	76.9579	74.8754	69.6081	82.4135	81.8082	48.8169	42.2312	48.5974	54.1194	60.2558	50.914
765.634	83.0069	70.9371	81.4058	70.3261	76.9231	75.7351	44.5828	50.3682	47.4602	53.2807	57.1355	57.8876
768.831	75.1224	80.3078	80.658	73.1678	77.8953	77.9335	39.4147	51.215	45.3753	60.0395	56.1637	54.5024
771.992	76.7875	79.1761	75.4736	79.2701	77.1232	76.3122	49.2217	45.5817	51.0993	56.2901	58.0051	51.1848
775.154	81.2929	73.9249	80.4088	75.3515	79.5825	79.2525	41.0025	48.8218	44.5034	48.446	52.1739	50.1693
778.31	76.2488	74.9208	83.6491	71.4029	70.1172	77.1091	44.8941	47.8645	46.6641	58.0168	59.5396	42.7894
781.495	84.7209	76.2336	78.9631	76.8471	77.8667	78.4556	43.6177	47.6804	47.4223	56.7341	57.8517	58.5647
784.657	76.2977	73.9701	89.9302	74.0951	77.7524	81.2311	45.3611	50.0368	50.834	56.5861	54.7826	47.6642
787.853	83.2517	81.4396	75.2243	71.8217	73.6059	80.1044	43.1818	45.5817	44.5034	52.146	53.1969	51.0494
791.025	77.7669	79.7646	79.6112	75.6506	71.7472	76.2297	42.0922	47.7541	55.6482	48.7913	53.7084	46.107
794.209	85.3085	72.3857	86.8893	72.9285	68.0583	78.4556	45.5168	44.5876	47.5739	49.778	49.6164	54.5024
797.397	73.3105	77.7727	83.5992	75.6207	77.8667	77.8236	46.731	44.5508	49.8484	52.6394	59.0793	49.2214
800.568	84.3291	71.0276	77.6171	74.2447	73.32	81.9181	45.6413	47.4595	46.4367	55.0567	49.3095	46.5809
803.78	79.9706	80.7153	84.6461	72.5097	73.3772	74.2786	38.4807	52.9087	55.1554	52.4914	59.4373	56.6689
806.959	73.2125	68.9	79.0628	68.0227	78.9534	78.4556	46.8555	45.4713	52.3124	47.4593	59.4885	53.4868
810.141	78.9422	75.3282	74.4267	70.9243	77.2662	73.7016	45.5168	43.8881	52.464	52.886	61.5857	51.1848
813.366	77.1303	68.8547	83.6491	76.4882	76.008	72.8497	48.3499	47.1281	43.7832	48.89	56.3171	51.3879
816.554	75.7591	76.3694	84.6959	74.0353	70.1744	70.349	42.5903	46.7231	50.6444	50.7153	52.6854	50.3724
819.76	77.7179	83.1598	81.6052	75.2318	76.1224	72.6848	43.0573	42.7467	47.4981	47.6566	48.2864	55.5179
822.935	74.4858	79.0856	77.1186	73.108	76.151	71.4482	41.4695	45.6922	51.213	48.6926	55.2941	50.9817
826.134	70.8619	80.8963	72.0837	68.7107	75.0643	73.2344	45.5791	43.299	47.6876	51.9487	52.2762	47.1903
829.307	85.4065	72.7026	81.9043	66.886	70.9179	74.3336	50.9651	49.3741	45.6785	51.0113	49.2072	53.2837
832.479	76.8854	72.2046	79.7109	72.061	72.0618	79.3625	45.5791	48.4904	47.0432	55.4514	46.5985	45.7007
835.661	73.3595	73.9249	82.4526	72.4499	75.0071	79.0877	44.2715	48.0486	44.3139	54.4647	50.5882	41.6385
838.839	76.6895	67.723	78.3151	71.4927	76.6943	75.3504	45.7036	51.1414	45.8302	52.146	52.2251	49.6953
842.038	85.3085	73.0647	74.2772	71.6422	72.4907	77.6312	43.213	46.7231	46.5883	49.3833	61.7903	54.7055
845.248	77.1792	75.5093	79.0628	70.3859	71.1181	76.4496	47.9763	49.19	47.8014	49.186	56.0102	49.4922
848.474	76.6895	76.1431	76.9192	77.5351	71.2897	79.3625	38.1382	50.5523	44.2002	56.4874	47.3146	48.8152
851.666	75.7101	79.1308	79.1127	71.044	77.3806	79.7472	49.9689	48.3063	47.3086	48.89	52.5831	54.0961
854.86	80.9011	70.8013	82.1037	75.8301	71.4327	79.7747	42.1856	44.1458	48.1804	51.9487	48.9514	39.8104
858.024	86.3369	75.0566	76.2712	73.6464	77.0947	76.5595	46.5442	46.9809	56.4822	47.9033	56.4194	50.7786
861.205	69.3928	68.1304	83.8983	73.3174	75.3503	75.5977	44.9564	49.0795	52.1986	50.1233	49.2072	57.8199
864.39	76.6405	76.3241	76.2712	74.484	79.4395	69.5521	43.5866	44.919	46.5883	52.3927	48.8491	44.7529
867.576	75.2693	72.4762	80.5583	71.8217	72.3763	79.7472	45.1743	44.2194	47.9909	52.442	51.509	61.4083
870.749	77.4731	81.2132	72.1336	70.5055	75.9222	76.6969	42.061	40.0957	46.9674	51.7514	52.7877	48.7475
873.913	77.0813	79.8099	74.8754	71.2833	74.7784	74.8557	47.198	48.0854	50.1137	49.2847	58.9258	52.5389
877.084	78.4525	74.6944	82.2532	73.9755	72.8053	73.152	41.5318	45.4345	48.4458	55.0567	52.4808	58.023
880.266	73.5553	78.4518	74.7258	71.6422	73.7203	74.4435	40.5355	49.6318	47.6876	51.11	61.7391	53.6222
883.431	88.6876	71.8425	78.4646	77.8044	70.489	76.6419	49.5641	45.6186	46.2472	53.4287	48.5422	58.2938
886.627	72.429	81.5301	79.661	76.3685	74.1207	76.3122	46.9801	45.4345	49.8105	47.8046	48.6957	50.3724
889.807	80.5583	80.67	82.1535	77.9838	74.9214	71.668	43.3375	44.2563	52.8052	45.4859	48.2864	41.6385
892.989	68.903	72.8384	73.9282	74.813	76.6085	74.7183	45.2677	46.8336	47.6497	48.1993	56.4706	57.9553
896.194	75.5632	74.4681	76.8195	69.6979	72.0332	80.9013	42.0922	46.944	47.4602	51.258	54.8849	52.8775
899.371	76.6405	68.6736	67.6969	69.9671	73.1484	75.7901	44.6139	40.7953	50.4549	53.33	56.624	48.2735
902.538	78.9912	72.7478	79.5613	68.3518	77.1804	72.5199	41.5318	44.7717	47.8393	46.818	44.0409	49.6953
905.722	79.7747	70.077	81.6052	70.5055	72.4907	80.3517	41.8431	47.975	49.4693	55.0074	49.4118	47.4611
908.885	75.4652	82.8429	83.001	73.2576	73.2056	77.4938	41.4695	46.539	47.4981	41.3419	53.8107	49.5599
912.068	79.8237	76.1431	80.8076	75.0224	71.7186	78.2907	47.0112	38.218	46.8916	55.6487	56.8286	47.8673
915.235	82.5661	71.0276	75.5234	79.4197	76.3226	70.8711	48.3499	49.5582	49.6588	48.1006	57.8517	46.9871
918.408	76.4447	77.5917	78.6142	69.8774	74.5782	78.5655	41.2827	45.729	42.7597	42.3779	60.1023	55.7211
921.57	71.0088	71.933	78.0658	75.0224	76.3226	70.5688	44.0535	48.0486	46.0955	56.1914	47.468	49.9661
924.758	77.9138	72.612	79.7109	69.5184	70.0601	75.2405	45.9527	42.3049	46.323	43.5126	55.9079	46.9194
927.971	76.3957	68.9905	77.1186	70.2363	72.6051	70.0467	42.7771	46.7968	48.2563	46.4233	56.0102	51.8619
931.186	75.1224	73.8796	80.0598	67.4245	69.8599	70.7337	44.2403	42.4153	48.1046	51.702	52.3274	49.1537
934.35	80.999	69.6243	70.2393	67.5142	66.8001	74.4985	46.5442	43.1149	44.9204	48.742	53.4527	51.1848
937.515	73.8492	76.8221	78.0658	71.9713	71.8902	76.3671	43.2752	43.6672	48.5595	43.5619	52.9923	54.9763
940.691	74.3389	70.9823	79.661	67.0954	74.5782	77.1641	39.6949	43.8144	48.9386	44.9433	47.2634	47.935
943.857	80.95	77.8633	77.9163	62.9076	75.5505	75.1855	42.9016	43.7776	46.2472	55.7474	54.4246	49.1537
947.067	75.6611	74.0607	75.4736	64.8818	63.197	73.8664	46.4508	47.6068	48.0667	51.554	53.9642	46.5809
950.268	78.7953	72.8837	82.4526	70.2363	76.0366	73.2619	45.1432	48.0854	47.2328	51.2087	53.913	50.8463
953.444	77.8648	80.2626	79.8604	79.659	74.95	71.3383	47.1357	48.2695	44.9962	49.0873	56.3683	49.4922
956.613	78.1587	68.7641	77.6171	67.9031	77.1518	73.2344	46.7933	44.7717	43.859	52.8367	55.7545	54.2316
959.795	77.3751	69.579	79.6112	70.356	70.0886	69.03	45.9215	50.9573	51.7058	48.1993	47.468	49.3568
962.985	75.5142	69.2168	81.8046	75.8301	76.5799	70.8162	43.2752	40.8689	50.5307	46.374	53.6573	57.7522
966.169	74.094	78.7234	81.655	72.3302	77.0375	73.2619	43.7111	41.1635	48.9007	52.2447	52.0205	51.6588
969.332	73.5064	70.4391	79.1625	66.7365	69.9743	72.5199	41.3761	45.8763	49.7346	48.4953	49.2583	50.237
972.512	80.0196	77.4106	76.2213	71.9414	67.4578	72.5749	41.8431	48.8586	46.1334	51.702	47.11	54.7055
975.687	76.5426	70.4844	75.673	69.668	66.6285	80.654	42.0299	42.7467	44.5792	45.5846	51.3043	48.7475
978.88	81.9785	75.9167	81.1565	72.061	70.1172	72.8772	40.6289	43.299	51.9712	49.334	51.4578	60.325
982.061	79.6278	77.3653	75.8225	66.4672	77.8096	75.3779	39.6638	43.0781	48.5974	52.2447	55.9079	44.4144
985.234	80.0686	78.7687	67.996	70.4756	75.2359	68.6727	45.1432	45.2872	50.7961	51.6034	57.5959	39.9458
988.44	74.7307	72.1593	83.3001	70.7149	75.8936	72.7947	44.0535	39.8012	46.8537	52.0967	54.9872	45.7684
991.638	77.4241	75.3735	75.6231	70.3859	68.9448	77.6862	44.3026	48.9691	48.3321	44.3019	47.8772	55.6534
994.83	73.0167	68.7641	81.007	68.7407	70.5748	73.5092	47.7584	49.3741	49.2798	46.818	57.4936	48.0027
997.994	81.2929	76.1883	79.5613	75.3515	79.2679	71.0635	41.0648	42.3417	47.6118	45.3379	58.5678	46.4455
1001.21	83.1048	77.6369	76.9691	66.4672	79.1536	76.1748	42.4035	46.1708	41.3571	50.518	49.5141	53.4191
1004.38	85.6513	80.8058	75.9222	71.4029	72.9482	63.6439	42.4346	45.4713	45.9439	51.9487	51.6113	47.3934
1007.55	79.6768	75.7809	78.2652	70.5654	78.7532	71.5032	40.8468	47.8645	48.0288	49.3833	52.6343	41.3676
1010.72	67.7767	67.9946	75.8225	64.1639	69.9457	78.3457	43.0262	42.268	42.3048	53.626	58.0051	48.8152
1013.88	78.3546	76.3694	75.4237	74.9925	70.0601	76.0374	44.3337	43.7408	44.0485	53.2314	56.0614	52.6743
1017.05	79.6768	75.8262	79.2124	67.4245	76.6371	71.6406	41.7808	45.5449	38.2866	48.6926	51.4066	51.8619
1020.24	73.4084	74.966	72.5324	71.044	72.3191	68.8651	42.995	46.3918	42.3806	46.8673	55.8056	55.2471
1023.42	79.285	75.3735	71.8345	70.685	67.4864	72.1627	43.1818	38.9543	45.1478	51.11	47.1611	49.4922
1026.62	74.6817	70.2128	76.7697	68.5911	70.1458	74.0038	46.4819	48.3063	48.4079	52.0967	53.1969	50.7109
1029.85	81.2929	75.1924	78.664	68.262	75.1215	69.8269	43.6177	45.4713	38.7415	47.8046	48.798	47.4611
1033.07	76.2488	69.579	76.3709	69.3688	73.8919	67.4086	41.3761	46.9809	49.0523	51.6034	52.0205	49.6276
1036.28	70.8619	73.6532	77.8664	72.6892	71.547	71.3383	46.2951	44.4772	50.9477	46.0286	61.8414	57.5491
1039.45	78.9422	67.5419	79.9601	69.1295	71.0609	72.0802	38.6675	47.9013	49.2798	48.594	50.8951	50.7109
1042.66	76.3957	76.7768	75.8225	71.2235	69.0592	73.3718	38.8543	47.6068	43.1008	50.2713	49.7698	50.1016
1045.83	77.2772	61.1589	81.007	69.9073	71.6042	70.2391	44.396	49.7423	45.8302	47.1633	50.7417	50.3047
1049.01	77.522	68.0851	79.8604	69.7278	72.7195	72.1077	38.8543	49.0427	42.608	45.3873	57.5448	42.7217
1052.2	74.094	75.7356	73.2303	69.9372	72.9768	76.9992	45.6102	46.2813	43.7832	54.0207	56.624	46.9194
1055.37	72.6738	76.1883	70.987	66.1083	73.6917	71.1734	42.2167	43.9617	47.8014	47.3113	53.0435	45.3622
1058.54	73.8492	74.6492	75.3739	74.1849	69.6025	72.2451	42.3724	41.5685	44.3897	45.8806	47.9795	46.107
1061.74	76.0039	74.3775	76.1216	69.0099	72.5765	71.0085	40.411	45.3976	48.1046	52.7874	50.5371	56.3981
1064.91	73.4084	76.641	77.2183	67.9031	68.6589	71.5581	42.3724	48.1222	48.37	53.8234	53.8107	49.5599
1068.09	74.6817	64.9615	77.9661	73.9156	69.8027	70.8711	40.7846	44.109	42.7597	47.3113	55.4987	47.3257
1071.28	75.6121	79.3572	75.0249	64.5528	68.7446	69.0574	41.8742	39.2857	48.9765	47.6073	49.6164	55.7211
1074.45	74.5348	71.8877	82.1535	70.4457	72.4621	79.1976	43.8045	44.3299	45.5648	53.8234	47.5192	54.8409
1077.66	73.3595	74.2417	86.5404	64.5528	64.4267	65.1827	43.8667	46.9809	43.8969	49.482	48.5934	51.8619
1080.84	76.2977	77.4106	71.2363	71.2833	72.4049	66.3369	45.8593	44.1458	48.2942	48.6433	53.0435	59.5125
1084.06	73.7512	74.0607	77.3679	66.7664	73.9777	72.41	46.6376	40.5376	52.3503	43.5126	47.7749	51.1171
1087.23	80.0196	76.2789	73.33	71.373	66.4856	76.4221	45.3923	45.3976	43.1766	45.0419	52.0205	42.0447
1090.43	78.4525	79.493	76.3709	66.9159	71.3183	68.2605	42.9328	42.2312	48.3321	48.3473	58.4143	53.9607
1093.61	71.6944	73.3816	74.676	73.1678	71.1467	74.0588	43.929	40.5007	43.2904	48.3966	52.8389	49.4922
1096.8	71.5965	65.5953	74.4766	75.3814	75.4075	70.6788	44.863	42.7099	43.4041	54.7114	56.8286	54.7055
1099.98	74.8286	73.789	66.2512	67.9629	70.6892	69.7719	44.2715	45.4713	47.9151	51.3074	52.7877	48.3412
1103.2	82.4192	73.3364	82.4028	63.446	69.7741	72.1902	38.6986	45.0295	39.9166	52.1954	56.3683	46.784
1106.45	78.5015	69.579	71.8843	60.694	68.8876	67.2163	42.6837	43.9249	48.1804	48.9887	52.5831	48.7475
1109.63	79.8727	70.3938	74.8255	64.6724	75.0071	66.7216	44.8319	42.3417	44.655	52.146	56.4194	48.2058
1112.81	79.0891	76.2336	77.318	72.0311	73.8919	65.3201	46.0461	44.4772	41.0538	46.4726	45.1151	44.7529
1116.01	72.8208	70.8918	73.4796	68.6808	73.6345	72.0802	39.1656	45.2135	43.4041	51.85	54.2199	57.8199
1119.18	71.4006	74.785	73.1306	69.0099	66.9717	71.3383	42.6837	38.6966	46.9674	51.5047	45.422	52.1327
1122.38	77.9628	73.9249	71.5852	66.7066	71.0037	75.1305	40.6912	43.1517	46.4746	44.3019	47.8772	43.9404
1125.6	69.3928	66.5007	72.7817	71.1038	69.288	72.1077	48.599	41.9367	42.7976	55.7967	52.2762	44.5498
1128.78	67.9236	70.5297	66.002	71.9414	68.1727	68.2056	45.4545	42.489	44.0485	48.1006	50.6905	49.3568
1131.95	73.4574	72.3404	75.7228	69.1295	72.2619	66.859	41.5629	40.648	43.7453	45.9793	50.2302	44.8883
1135.17	71.5475	68.5378	71.8843	68.3817	70.7178	65.5125	47.3537	47.4227	47.536	46.8673	49.1049	51.1848
1138.38	80.8521	78.4971	70.2891	70.356	69.3452	70.7612	44.3026	45.9499	42.4943	53.626	41.4322	45.633
1141.57	66.7483	75.3282	77.5174	68.4116	69.6025	72.3825	42.7148	43.5935	42.7976	50.962	57.6982	48.2735
1144.76	77.2282	73.0195	78.0658	67.4544	71.1181	66.0621	43.4309	37.7393	43.9348	45.1899	50.4859	50.5755
1147.96	65.7689	68.4473	74.8754	63.7451	77.7238	70.4589	42.4035	41.458	45.2995	50.962	56.1637	44.1435
1151.12	74.8286	73.3364	70.2393	66.8561	61.7672	71.3108	42.4035	42.8571	45.2616	44.5486	52.1228	56.4658
1154.38	69.1479	68.9905	79.4118	65.0314	66.7143	73.7016	44.5517	42.4153	49.5451	45.0419	48.491	42.1124
1157.56	73.6043	75.8714	69.0927	67.6039	70.0315	68.9475	40.8468	42.8203	40.1061	46.374	47.9284	42.5186
1160.78	72.429	80.2173	76.7198	59.0488	73.3486	69.9368	41.0959	43.3358	45.3374	48.0513	51.9182	47.7996
1163.95	75.0245	71.6161	71.7846	70.8645	65.1987	68.6727	39.2279	48.2695	49.0523	49.63	53.1969	48.5443
1167.16	79.9216	75.2377	76.8694	67.3946	69.8885	68.7552	41.6563	43.8513	45.7544	49.8767	47.8772	49.8984
1170.35	79.383	69.4432	76.1715	67.1852	71.2611	72.5199	41.812	44.2194	46.0576	51.258	50.2302	47.5288
1173.52	65.0343	74.2417	72.0837	69.7876	61.9102	67.1063	40.7534	42.673	49.5072	49.5313	54.4246	52.4035
1176.72	75.4163	72.1593	82.9511	66.3476	72.9482	71.1734	37.6712	41.5317	46.1713	47.3113	54.6803	44.6852
1179.91	68.3643	72.1593	72.7318	65.3605	70.0601	67.5185	40.9714	46.5022	46.6641	55.3034	48.491	43.3311
1183.09	68.8051	79.5835	84.995	66.7963	69.145	70.1292	39.5704	40.8689	48.4837	47.0646	56.0614	52.8775
1186.26	78.1097	66.4101	74.3769	69.1894	66.4284	71.8604	41.5629	41.1635	40.8643	45.2886	56.0614	47.1225
1189.45	72.6738	68.5831	74.2772	66.8561	69.9743	70.5963	44.8007	47.8277	43.1008	47.1633	51.509	53.216
1192.63	78.4035	65.3237	67.348	68.4116	66.3712	73.5642	44.7385	43.2622	43.2146	47.5086	58.9258	42.4509
1195.83	69.7845	70.9823	81.007	65.6895	71.3755	69.4422	40.7534	46.9809	42.4564	50.074	57.6471	47.5965
1198.99	71.6944	67.1797	74.4267	61.741	68.6874	71.1734	41.345	43.6672	49.8484	45.0913	51.2532	54.5024
1202.19	80.7052	73.2005	71.4855	65.8092	66.6571	66.7216	44.6451	42.9676	46.0197	57.5728	55.8568	48.6121
1205.39	70.4701	70.077	71.7348	68.98	66.8001	64.111	39.3213	43.299	45.5269	51.702	48.1841	51.6588
1208.56	73.0167	65.6406	72.1336	65.1511	71.6614	70.1566	35.8655	46.0604	44.0485	49.2847	49.0026	48.6798
1211.73	73.3105	74.4228	67.8963	72.7789	64.3409	68.6727	48.132	42.894	46.323	46.5713	54.1688	55.7888
1214.9	75.0245	75.2377	78.7637	62.1298	67.2291	70.7062	42.0299	43.0412	41.0917	42.6246	52.8389	53.1483
1218.06	70.3232	69.4885	77.1186	65.4203	71.4041	72.1352	39.6949	40.4271	44.2002	44.2033	56.1637	49.6953
1221.28	66.8462	74.6492	72.0837	61.2923	63.5688	70.6238	40.7534	39.3225	46.5125	48.298	46.9054	52.3358
1224.46	75.5632	80.3078	70.0399	65.2408	67.3434	70.4314	39.5704	43.3726	43.8969	48.298	49.5652	44.6175
1227.64	69.1969	70.5749	77.5174	70.356	69.4881	71.4757	41.7808	43.0781	42.0773	40.0099	53.5038	39.5396
1230.81	81.1949	69.3526	76.7697	67.245	65.1987	73.6191	44.2715	43.2622	47.7255	50.962	58.5166	51.7265
1234	72.38	69.579	77.2183	63.5956	68.5445	65.2927	39.8506	43.7408	44.2381	53.9221	53.4015	46.7163
1237.19	75.906	66.2743	76.8694	69.2193	69.8313	69.8818	38.5118	44.6613	46.4367	46.3246	50.5371	47.5288
1240.37	65.7689	73.8343	78.1655	66.198	67.6866	65.8697	43.7422	45.2135	45.7544	44.9433	52.1228	54.5701
1243.56	68.1685	77.6822	75.0249	64.0144	63.2828	70.1566	41.594	44.1458	47.1948	40.3552	53.8619	46.784
1246.74	73.0167	69.2168	79.3121	61.9204	69.8599	73.8115	42.6214	43.8513	47.8393	45.7326	54.7315	58.7001
1249.95	77.3751	69.9864	75.3739	64.822	67.0861	73.3168	45.1743	43.704	44.5792	48.1006	46.9565	39.8781
1253.13	71.9882	69.2168	77.4177	67.0655	64.9128	67.7109	40.6912	41.7526	43.1387	45.9299	52.3785	46.9194
1256.33	71.9882	64.6899	67.8465	68.2321	65.7707	67.5735	41.4384	40.9057	47.1948	43.8579	52.7366	49.9661
1259.5	81.8315	70.077	74.9751	71.7021	66.7143	70.9536	42.279	44.5876	45.1478	51.702	52.1739	51.8619
1262.69	76.1508	69.7148	70.4885	68.8304	68.5731	71.1184	35.1494	46.8336	42.229	50.814	53.0435	51.3202
1265.9	74.9755	73.2911	75.7228	63.7152	60.652	69.7444	42.8394	39.9116	44.6929	50.518	51.1509	43.1957
1269.08	71.4985	72.9742	78.9133	62.5486	67.9154	78.9503	42.279	38.5125	43.859	48.1993	52.1228	48.5443
1272.28	75.6611	72.5215	77.318	71.9414	65.9994	65.3476	41.0025	43.3726	40.561	50.074	52.9412	43.0603
1275.52	70.2742	72.3404	77.7667	67.2749	64.97	72.3001	41.4695	39.1753	42.4943	44.4993	54.5269	46.784
1278.69	68.2664	73.9701	78.1655	64.6724	66.8001	64.8805	45.6413	39.5066	44.655	50.666	54.4757	52.4712
1281.87	68.6092	73.9249	75.4736	64.2537	67.801	66.8041	43.0262	41.863	43.442	52.442	47.7749	48.9506
1285.07	63.0754	73.2911	78.5145	62.429	68.4873	70.0192	41.9988	36.8925	44.3897	43.9566	51.9693	52.6743
1288.25	75.4652	65.8669	74.9751	61.9803	72.3477	67.2987	40.9402	39.2489	43.7832	47.2126	52.2251	56.3981
1291.42	72.0372	72.7026	79.4118	66.3775	67.372	73.097	41.9676	42.673	38.2108	47.114	50.3836	50.9817
1294.61	71.7924	64.9163	74.3769	66.9159	72.5479	65.3751	40.411	44.3299	43.1387	48.742	53.1969	52.3358
1297.8	70.2253	73.11	70.7876	64.9118	69.4881	63.5614	38.2316	45.3608	51.5163	48.6433	50.7417	50.8463
1300.99	75.6121	66.8628	71.0867	64.2836	68.0583	66.859	44.1469	42.8203	40.978	38.6285	54.7826	50.0339
1304.17	73.1636	70.8918	72.9811	60.7837	66.457	60.5936	42.1233	42.2312	46.7779	47.9526	50.0767	43.2634
1307.35	74.4368	69.8959	74.4267	65.8391	66.1138	64.4133	43.5554	40.5376	46.2851	48.3473	50.9974	55.1794
1310.52	70.764	71.7519	67.3978	62.6383	65.6563	67.9857	43.4932	44.6613	45.8681	52.6394	49.156	46.7163
1313.71	69.6376	72.6573	75.5733	69.4287	68.5731	70.0467	42.6526	42.7467	45.9818	43.0192	48.0307	50.1693
1316.92	68.2174	71.1634	67.8465	62.758	61.71	65.4575	44.1781	41.053	47.1948	43.3646	49.7187	49.2891
1320.1	68.2664	66.1838	71.1864	65.4502	65.1701	69.03	42.9016	42.489	44.2002	49.334	55.7033	49.1537
1323.29	72.1841	70.5749	78.016	68.0227	64.1407	62.2699	39.7572	38.623	42.2669	45.5846	50.2813	48.7475
1326.48	78.8932	66.5912	73.0309	63.1469	76.4655	65.8148	41.345	46.0236	45.5269	46.0286	47.5192	49.086
1329.69	75.7101	68.0398	72.6321	62.5785	64.9128	64.4408	40.4421	43.4462	42.1531	46.0286	58.7724	51.4557
1332.88	72.9677	64.3278	74.4267	65.5998	67.0003	70.8711	40.7534	42.6362	50.3412	47.0646	47.2634	52.1327
1336.04	72.38	65.5048	73.1306	65.9886	66.4284	67.6834	39.2902	41.3108	48.4079	50.1233	47.2634	48.6798
1339.23	74.4368	66.4101	68.1456	62.9375	70.9465	70.5963	47.9452	43.0044	41.5466	50.3207	58.1074	52.065
1342.4	78.3546	65.7764	74.5264	62.8777	69.0306	62.8469	38.5118	40.5376	44.6171	46.966	52.1739	46.1747
1345.59	72.7718	74.1965	65.1545	66.0485	67.3148	69.9918	46.9489	44.8454	41.1676	57.0794	48.3376	41.6385
1348.75	74.4858	67.5871	70.5882	67.8433	72.2905	65.5125	41.594	42.8203	47.0432	50.8633	50.4348	48.7475
1351.93	67.8257	71.1634	73.3799	70.2064	64.4267	64.7705	41.9676	42.894	42.1531	47.9033	49.3606	45.4976
1355.15	72.6249	74.9208	64.656	62.8477	69.1164	61.7477	43.7422	44.4772	39.7271	47.2126	53.7084	51.7265
1358.34	71.1557	64.6899	70.1894	71.1337	66.6285	64.8805	42.746	43.1149	44.7688	50.1233	55.7033	51.8619
1361.51	67.8746	69.8506	64.656	68.2321	71.4327	66.3644	40.66	43.2622	41.1676	49.5807	50.0767	45.2268
1364.69	70.3722	71.2087	70.2393	64.2537	63.8261	63.5065	45.1743	40.7216	42.0773	49.926	47.8772	44.2789
1367.85	75.2693	69.2621	70.0399	67.0655	65.0558	60.9233	38.8232	43.3726	49.6588	48.594	52.9412	44.0758
1371.02	71.5965	62.6981	75.0748	64.2238	70.7749	67.0239	35.8966	45.1031	43.6315	45.8806	52.9923	50.9817
1374.23	68.0215	64.871	73.9781	64.1041	71.6042	71.8879	38.4184	42.2312	48.2942	46.966	47.4169	48.3412
1377.45	79.0891	78.2707	76.2213	67.3946	70.8321	68.288	43.0573	40.5007	43.8211	44.2033	57.4425	49.1537
1380.65	72.2821	71.3445	72.5823	57.7027	64.0549	68.6727	40.6912	44.5876	43.859	47.262	54.7315	56.1273
1383.84	72.0372	69.6695	73.679	63.6255	62.0532	69.9643	45.7659	43.8881	46.9295	42.4272	57.1867	49.2214
1387.01	63.9569	64.4636	66.0518	65.7194	66.7143	70.6513	38.4807	37.7761	42.6839	52.1954	47.3146	45.5653
1390.2	66.5524	68.4473	70.0399	69.8474	68.9448	67.6559	38.7298	44.1458	44.3897	44.7459	45.5243	59.5802
1393.38	75.857	75.464	73.0309	57.7625	68.3443	67.1338	38.5118	43.1517	44.9962	44.7459	60.4604	49.6953
1396.61	73.9471	73.11	74.5264	66.886	71.6328	69.7719	34.3088	46.6127	42.8734	47.41	56.1125	44.2789
1399.81	66.4055	64.0109	67.0987	62.8777	67.944	63.3141	43.7733	37.9602	43.1766	44.1539	50.9463	52.6066
1403.02	67.8257	80.0815	74.676	62.4888	64.6268	68.2056	42.9639	39.8748	45.8681	51.406	46.3427	41.3676
1406.2	59.4025	70.4391	70.4885	66.886	68.8018	64.111	39.1345	41.3108	46.0197	48.6433	59.6931	44.0758
1409.4	70.1273	75.1924	73.6291	64.1639	58.879	58.615	42.8394	43.0044	45.8681	44.6473	44.3478	39.8781
1412.57	73.3105	66.2291	66.4008	61.8606	66.7715	67.3537	39.9128	42.4521	44.0106	43.8579	50.179	45.2268
1415.76	70.9109	69.2621	71.8345	64.7024	67.2862	63.3141	41.2516	37.813	40.182	43.1179	47.7749	50.914
1418.94	63.9569	62.2454	66.002	61.711	68.5445	67.0514	41.5629	37.9971	42.4943	50.4687	45.8824	47.8673
1422.14	75.5632	74.8302	72.1336	66.2279	65.3703	73.784	41.127	43.7408	41.395	48.6433	39.6419	54.6378
1425.33	71.8903	68.5831	66.5503	67.5142	67.9154	65.1553	37.2665	46.6863	47.953	37.8392	54.1176	43.5342
1428.5	75.857	67.9493	74.8255	66.8262	61.996	64.3309	42.1233	42.7099	45.7923	47.558	53.2481	48.2058
1431.69	69.9804	70.5297	71.9342	64.5528	65.9422	64.6881	40.0062	43.1149	42.0394	40.9472	52.0716	47.1903
1434.87	70.1273	63.7392	73.2303	61.5615	68.6589	66.0896	39.3524	46.7968	40.3715	45.2886	43.3248	46.5809
1438.09	82.811	68.2662	63.9083	65.3904	63.2828	66.3369	39.6015	39.5803	42.608	51.258	47.5192	52.2681
1441.26	75.0245	68.402	70.4387	61.9503	63.0826	60.676	42.6526	38.8439	44.9962	49.334	49.6164	54.2993
1444.46	74.7796	73.4269	76.2712	61.5316	64.7126	66.7766	40.1308	40.3535	42.5322	52.146	53.1969	50.4401
1447.63	68.3154	65.0973	63.1107	63.2067	69.9743	64.6881	44.396	48.3432	41.4708	39.0232	43.8875	49.0183
1450.84	74.192	68.5831	74.3769	62.6084	60.2802	62.4073	38.8543	40.3903	46.6262	48.3473	49.6164	46.1747
1454.03	69.5886	67.4061	61.7647	63.8648	62.5107	69.3872	40.8468	41.9367	43.5178	46.9166	46.0358	53.3514
1457.21	75.857	71.435	68.6441	63.8947	68.0869	64.853	35.8966	44.5876	46.8158	47.7553	46.5985	49.2891
1460.39	70.0784	69.4432	69.99	66.6467	67.6294	67.5735	39.6326	42.5994	46.4746	42.5752	48.6957	49.6276
1463.61	66.6014	65.2331	67.0987	67.245	63.2542	61.4455	39.1656	45.8395	46.1713	51.3567	45.7801	48.2058
1466.8	69.7356	74.0154	75.9721	67.0057	66.3712	66.5018	43.7422	39.3225	41.6603	47.6073	50.8951	49.086
1470	73.0656	64.871	70.2891	62.7879	69.6883	61.7203	39.1345	44.8085	38.3245	43.8086	49.7698	54.7055
1473.18	72.429	66.2743	72.8315	62.6383	63.8261	64.111	41.812	39.9116	46.4746	47.41	51.8159	46.107
1476.37	64.6425	71.3445	75.4237	64.7921	63.7403	63.7813	41.1893	43.9249	42.8355	40.9472	54.2711	51.3879
1479.57	74.0451	74.2417	72.3829	59.9761	66.028	62.8469	37.8269	37.9602	43.1008	46.2753	55.7033	51.9296
1482.78	69.5397	69.1716	65.9521	66.8561	66.8287	68.92	41.9365	43.1885	34.42	46.966	49.6675	45.5653
1485.95	71.0088	70.0317	69.99	60.4547	66.9431	68.1506	42.3412	38.8071	43.3662	45.3873	48.6957	44.0081
1489.14	75.2204	69.8506	72.9312	63.7152	62.4249	58.67	47.3225	42.7835	41.5087	47.0646	50.7417	46.9871
1492.36	68.903	69.3979	68.8933	63.4759	68.1441	63.2042	40.4421	43.5935	45.4132	47.8046	52.6854	48.9506
1495.54	70.0784	63.6487	64.5563	70.8346	64.9414	63.0393	42.8394	45.324	46.702	45.8806	49.2072	51.7942
1498.71	73.2615	71.8877	74.7258	68.7407	66.6285	60.9233	40.5666	38.8071	44.7309	49.2353	52.89	44.6175
1501.92	67.189	58.6691	65.3041	61.8905	62.7395	65.3476	46.264	47.57	45.6785	48.1993	57.5959	50.1693
1505.09	73.2615	66.1385	67.2981	68.8304	60.9379	67.9033	38.8543	43.3358	44.4655	47.1633	53.6573	51.2525
1508.29	75.4163	70.5749	70.5882	61.0829	65.1701	62.7095	38.4496	46.3549	43.1387	44.9926	47.7749	51.2525
1511.51	74.3389	75.7809	69.4915	58.63	66.7715	62.0225	43.929	38.5493	43.442	45.3379	52.532	52.5389
1514.69	77.9138	60.2535	70.1894	63.7751	69.288	63.7538	40.3487	39.2121	44.1243	45.3873	48.4399	48.4089
1517.85	74.143	68.3567	69.6411	65.7493	66.5142	68.3979	39.3213	42.4153	40.182	42.0819	49.4629	44.956
1521.04	75.1224	68.7641	70.5882	65.6297	64.5124	66.0621	42.1544	47.4595	47.3086	56.8821	50.2302	47.7319
1524.2	71.4985	66.048	71.2861	68.0227	58.0784	65.6224	42.1544	37.9602	42.0015	50.1233	45.2685	41.977
1527.38	75.857	69.1263	73.5793	61.2623	62.9397	62.7645	41.8742	43.1517	48.6732	47.854	50.7928	47.5288
1530.56	76.7385	64.2372	74.9751	64.0144	63.7689	63.2317	40.2864	42.8203	41.8878	47.0153	47.3146	46.5809
1533.76	69.1969	76.9126	67.7966	63.6853	66.6571	64.1385	38.2939	44.3299	43.6315	48.6433	46.8031	41.4353
1536.92	66.0137	64.8257	72.5823	61.3222	64.1121	62.3798	38.2005	38.2548	39.7271	43.4139	52.532	38.7949
1540.17	65.2302	71.3445	71.6849	63.4161	67.8296	65.3201	36.9863	41.0898	45.1857	48.3473	54.3734	51.7265
1543.35	71.7434	64.4636	68.993	58.7197	64.2551	63.0118	38.6364	41.1267	42.4185	44.2526	46.1893	42.1124
1546.54	72.429	68.1756	72.7318	62.429	59.3938	65.5949	37.9826	43.1517	41.3192	45.6833	55.0384	46.0393
1549.75	68.5113	66.1385	70.3888	58.4505	69.9171	63.3691	43.1818	42.3049	41.5466	46.8673	45.7801	45.7007
1552.93	78.0607	57.2205	69.4915	67.9629	63.3114	64.5507	42.528	41.7158	43.1008	50.8633	48.0307	53.0806
1556.1	75.0735	67.0439	73.33	60.0658	67.1433	68.3704	40.0062	42.5258	48.0667	50.9127	43.4783	45.7007
1559.28	61.7042	64.0561	67.8963	62.4888	63.5116	65.7049	41.4695	42.6362	39.348	50.8633	45.7801	47.7996
1562.45	64.4956	64.0561	65.7029	59.1385	58.9648	68.4804	37.609	42.3785	51.63	41.2432	48.0307	45.9716
1565.64	67.9726	67.9493	61.9641	65.0613	70.4318	61.5279	37.9514	42.9308	45.2616	47.9033	49.8721	47.3934
1568.87	66.1606	63.0602	70.1396	58.9889	70.4318	63.5614	37.609	39.5066	45.489	51.554	50.3325	42.7894
1572.08	66.7973	68.9905	64.7557	64.4331	63.7975	64.0011	40.9714	38.3284	43.2904	45.1406	46.5473	51.2525
1575.29	72.478	74.8302	67.2981	63.0571	65.7993	64.4683	38.6364	41.053	48.0667	43.4139	43.9386	51.5911
1578.47	71.5965	65.3237	74.327	61.1427	59.2222	63.8087	37.8269	41.7894	39.2722	47.2126	47.6726	51.9296
1581.65	66.6014	64.0561	69.1426	64.3135	63.8261	64.0011	37.9826	41.4948	39.5375	45.4859	46.9054	44.1435
1584.83	69.8335	71.1182	72.4327	60.3051	59.4796	61.4729	39.8817	41.0162	42.4564	41.7859	45.2685	42.8571
1588.05	73.8002	74.1059	73.1805	59.8265	60.7092	67.3262	42.9328	43.1885	45.1478	47.9033	46.0358	52.065
1591.23	70.3232	70.5297	66.8993	63.5956	65.4275	61.5829	39.01	42.673	42.3427	40.0099	46.7008	42.654
1594.44	63.4182	66.8628	72.7817	61.8307	70.3746	63.1217	39.6638	37.0398	44.6171	44.9926	49.6164	40.9614
1597.62	72.2331	66.3196	71.7348	61.4119	60.652	67.3262	41.0959	37.3343	45.0341	51.85	47.5192	45.4976
1600.8	74.4368	67.6777	68.7438	62.8477	69.3452	62.0225	42.8082	42.489	41.9257	49.6793	48.2864	49.6953
1603.99	67.8746	63.0149	69.2921	67.4245	63.1684	64.6331	40.411	44.0722	42.9871	44.0553	46.3427	43.4665
1607.17	75.6121	59.6197	70.339	61.5016	64.3123	62.9843	41.812	38.2548	39.0068	49.9753	50.8951	52.065
1610.35	68.0705	69.1716	76.8694	64.1639	56.2768	59.9066	43.2752	46.8704	42.0394	50.666	53.3504	45.4299
1613.58	67.6787	57.3563	68.9432	58.7795	65.7707	65.1553	35.4296	50	45.3374	45.4859	51.5601	46.5809
1616.81	76.5916	65.3689	65.3539	62.2794	60.223	64.6057	38.0137	44.2931	41.6603	51.1593	57.4425	46.9194
1619.98	69.5886	63.8298	69.99	63.8947	62.9969	60.6485	41.6252	41.5685	42.3427	42.5259	49.156	50.6432
1623.17	71.0578	80.3984	69.99	57.8821	61.7958	67.8758	41.8742	40.7953	41.2434	51.406	52.7877	49.2891
1626.36	70.5681	67.723	70.0897	64.3135	59.4224	63.8637	44.2403	43.4094	43.5178	46.818	52.3274	50.3724
1629.53	68.2174	60.8873	70.1894	62.9076	62.6251	66.0071	39.1656	40.648	48.7491	50.0247	43.8363	46.6486
1632.7	68.0705	64.5541	69.3918	64.4032	62.139	66.0621	43.6177	40.3166	42.9113	46.0779	43.8363	47.4611
1635.86	70.4212	71.6161	66.9492	63.6554	61.9674	65.0179	37.858	42.3049	43.9348	42.0326	51.2532	49.6276
1639.05	67.3849	69.4432	68.7438	62.2196	67.1147	67.601	42.0299	42.7467	46.5883	47.558	49.821	49.086
1642.22	64.2018	73.2005	70.0399	64.0742	63.0826	60.676	35.9278	48.785	50.7582	50.9127	55.3453	49.4245
1645.41	67.8257	63.7845	75.7727	69.997	61.7386	62.8469	38.1382	39.2489	39.9924	51.11	52.1228	48.6798
1648.61	70.4212	69.8959	67.2981	58.7795	71.69	66.4468	44.9564	39.433	40.7885	47.41	48.798	53.2837
1651.79	65.4261	68.5378	59.8704	64.2238	64.3123	61.7203	44.3649	46.3549	46.2851	41.1445	51.4578	40.0812
1654.97	71.8413	65.0521	71.6351	62.9375	61.4527	67.546	38.8232	42.1576	45.5269	49.0873	47.1611	40.6906
1658.16	56.7091	67.4966	65.7029	53.9934	63.5402	63.9187	44.3649	39.5066	44.5413	47.1633	47.2634	41.8416
1661.34	66.0627	67.3155	64.4068	63.0571	59.5939	62.792	40.3487	39.7275	41.1296	41.1939	48.2864	50.9817
1664.51	67.1401	59.4839	70.5882	64.8818	62.9969	61.2256	38.7609	42.8203	41.6224	46.374	50.0256	46.8517
1667.68	74.5348	65.5953	69.0429	65.869	67.944	62.5447	44.0224	44.4035	45.6785	46.4233	54.6803	44.956
1670.89	78.2076	67.6777	54.4865	58.2411	56.048	62.7095	41.7186	43.4094	41.7362	39.7139	47.5192	43.3311
1674.07	67.0911	66.1385	69.8405	60.7239	65.0272	58.7524	42.061	36.782	43.8211	35.4218	47.7749	47.6642
1677.25	63.712	66.0933	69.1426	66.5869	61.8244	64.6057	39.259	39.2121	44.655	46.966	54.578	41.6385
1680.44	64.8384	61.8379	65.4536	61.741	64.0263	63.6988	38.6986	39.838	39.5754	44.6966	52.1739	49.8307
1683.64	64.9363	65.6858	72.333	60.5743	57.2777	63.5614	40.2242	39.1753	38.514	46.3246	50.4859	47.3257
1686.82	69.1479	69.7601	70.0399	64.7622	66.6571	58.56	39.5081	40.9057	46.2472	45.0419	51.202	53.4868
1690	71.9882	61.1589	69.0429	66.886	63.054	63.424	33.7173	43.9249	42.7597	49.186	46.1381	47.7996
1693.24	71.5965	63.8298	71.984	62.1298	61.3097	64.3309	40.5044	40.3535	44.3139	46.5713	54.1176	39.3365
1696.43	65.573	66.5459	70.8375	54.9207	66.5428	58.0654	39.7883	36.5979	45.1857	47.0153	48.5422	53.9607
1699.61	65.8178	64.1467	73.8784	56.1173	60.4804	61.8851	39.0411	42.3049	47.6497	37.5925	48.4399	48.0704
1702.78	71.1557	60.9325	65.8524	62.2495	60.1373	64.5232	40.66	39.2121	47.8014	49.4327	50.8951	48.0704
1705.99	57.8844	67.3155	67.6471	58.9291	63.7118	62.737	39.1656	45.9131	41.395	41.3419	48.7468	52.8097
1709.17	71.3026	67.904	69.6411	62.2196	64.7126	61.1981	35.8032	41.6421	40.5989	45.2886	49.5141	41.1645
1712.35	73.3595	60.7062	71.1366	58.7197	63.3114	66.4468	40.9091	42.8203	47.953	37.4445	49.9233	53.0129
1715.54	60.2351	66.1385	72.5324	63.4161	64.2265	58.0379	36.7061	41.3108	39.2722	46.818	45.422	50.237
1718.73	66.0627	76.8674	55.6331	63.2665	58.9648	65.5675	40.193	41.3108	46.74	45.8313	51.6113	47.935
1721.93	74.9755	69.4885	72.0837	63.087	64.3695	62.7645	39.1656	43.704	47.4602	48.8407	47.3657	50.1693
1725.14	69.001	63.694	68.7936	66.1681	62.0818	62.3523	40.1619	39.1016	43.4041	48.89	48.1841	50.4401
1728.34	71.2537	61.4305	66.6002	59.3778	61.7386	60.8684	40.0996	39.838	41.2813	54.6621	43.4271	51.8619
1731.52	62.2429	57.2657	66.4008	64.0443	62.2534	56.5815	40.193	39.838	40.2578	47.8046	50.7928	46.3778
1734.68	69.3928	59.0312	60.0199	59.318	61.9674	66.9689	37.7646	39.8012	42.0773	47.6566	50.3836	45.7007
1737.87	66.1117	72.9289	72.7318	56.7754	61.0809	60.5386	37.8269	39.3594	42.1911	40.4045	50.6394	43.9404
1741.04	68.2174	63.3771	70.2393	58.5701	66.314	63.8087	39.4147	36.0088	43.5178	43.4139	42.1483	52.6066
1744.25	69.4417	63.0602	69.3918	58.8394	64.0835	60.5111	39.0411	44.6244	45.9818	46.67	54.6803	43.4665
1747.48	69.6866	64.5994	68.5942	60.9632	66.6285	61.1981	39.6638	39.6171	41.3192	44.6966	49.8721	48.3412
1750.66	66.9931	70.258	67.6969	58.7496	58.9934	56.3067	36.7995	43.0412	43.0629	43.4632	52.5831	48.2058
1753.86	64.5446	67.6324	71.336	62.9674	66.0852	60.1814	43.3064	43.2622	44.9204	43.7593	44.9105	52.3358
1757.03	72.9677	69.7148	66.2014	56.536	59.9371	60.4836	41.2516	38.3284	44.4276	47.7553	53.7084	47.3934
1760.19	65.573	69.2621	69.6411	57.8522	67.0289	56.3342	42.4658	36.6348	40.2578	42.7726	50.8951	45.7007
1763.36	67.4339	58.488	64.5563	60.3649	64.0549	65.4026	40.2553	40.243	41.9257	41.7366	47.8772	47.4611
1766.6	63.761	64.6446	63.1107	55.6087	61.2239	60.6485	44.3337	35.6775	39.4996	47.9033	52.4808	40.7583
1769.77	68.0705	66.048	68.7936	56.7754	61.9674	61.5004	42.0922	40.2062	44.5034	44.1539	53.6573	47.6642
1772.97	64.8384	64.9615	72.2333	62.429	59.5081	58.0104	40.0374	36.4507	40.7885	41.9339	46.9565	40.0135
1776.14	68.4623	64.7352	70.1396	56.5061	62.6823	61.3355	41.7186	39.6539	42.0773	44.1046	45.7801	44.3466
1779.34	71.4985	61.3852	67.5972	60.4846	60.9951	55.2075	40.5978	42.3049	43.442	42.6739	54.2199	48.0704
1782.54	67.1401	61.5663	64.9053	57.6129	56.8201	59.1371	39.7883	37.408	47.953	45.8313	48.9003	45.9716
1785.71	68.2174	62.3812	75.1745	57.6129	61.8816	63.5889	38.6052	42.5994	41.7362	44.9433	51.0486	47.1903
1788.9	63.81	56.632	62.4626	55.5489	57.4778	54.1632	42.528	40.7585	43.8969	51.1593	46.5473	43.4665
1792.14	64.9853	67.9946	57.8764	60.6042	60.3946	61.3905	43.4309	38.623	41.9257	51.85	42.9156	52.1327
1795.34	61.998	59.3481	71.0369	59.0488	68.6303	59.4394	42.5592	39.6907	43.5557	44.7953	54.8338	43.3988
1798.55	66.4055	68.8547	60.8674	58.6001	60.8236	64.2484	40.0374	43.299	41.3192	51.0113	47.8261	39.9458

## Sheet: Figure 1-Fig sup 3-Panel B
Time (s)	AB-Cy5/AB 77N0-Cy3 atp			AB-Cy5/AB 77N0-Cy3 amp-pnp
0	93.2343	92.7536	81.994	78.3099	79.808	88.0198
3.655	88.2838	91.0024	86.2202	78.365	91.6408	90.5496
6.849	88.4213	93.2669	90.9524	89.0173	90.0875	95.6383
10.026	84.1584	90.8213	92.2917	84.3105	85.7667	92.4687
13.192	89.0814	90.5495	86.6964	86.9805	89.6639	99.4475
16.379	91.8042	92.7536	88.2738	80.3468	93.0811	91.451
19.554	91.0891	92.4215	88.8393	83.4021	83.0839	92.0326
22.736	95.297	86.8357	84.0179	81.9433	87.8283	90.1134
25.932	90.1265	78.3213	93.6905	84.4481	83.2533	89.2701
29.14	88.0913	87.3792	100	87.008	88.3649	82.0006
32.339	90.7591	94.3841	85.3274	82.4663	86.1621	93.69
35.531	79.2904	100	89.4048	84.3931	82.5473	92.3524
38.746	86.3586	97.192	87.619	92.5957	91.9514	97.7319
41.92	87.1287	90.7911	81.756	83.5122	89.4663	87.6708
45.099	93.3168	86.5338	86.994	86.0171	88.7602	96.0454
48.294	84.6535	92.9046	89.7619	87.1181	90.6806	92.9049
51.518	82.5358	94.9275	88.3929	86.6502	89.7204	90.0552
54.701	87.8163	89.4928	83.0655	82.136	90.5112	94.5915
57.921	93.7294	96.6486	82.381	88.0264	91.0477	89.0084
61.118	90.1815	92.1498	89.8214	85.9345	83.7052	88.8049
64.312	86.1936	94.0519	95.119	97.0823	87.2917	99.7092
67.501	90.9241	94.9577	85.9524	86.0721	88.7602	90.1425
70.67	90.7041	85.2959	86.9345	90.0083	88.026	86.5368
73.866	86.6062	90.7307	89.1964	89.6229	91.9514	100
77.045	91.2266	86.413	82.9167	81.1175	81.5589	88.7758
80.23	94.692	86.4432	82.381	87.5585	93.0528	88.863
83.394	89.5765	87.349	86.9048	88.6045	86.4727	92.8468
86.565	86.6337	88.0737	81.6369	88.5769	90.0028	89.212
89.75	92.4367	96.4976	81.7857	90.779	95.9334	86.7403
92.96	87.7063	90.5797	83.006	88.7146	96.3005	81.2445
96.147	89.0539	92.3913	82.9167	94.0545	87.0093	91.3347
99.322	94.0594	95.5012	86.8155	89.4027	84.5241	92.178
102.5	87.7063	90.3986	83.3631	84.8059	90.6241	84.0942
105.693	90.7866	89.6739	86.9643	90.5863	87.0376	90.4623
108.883	92.5193	90.6099	83.4226	94.9078	84.8066	88.7467
112.094	82.7008	90.8213	86.6964	89.7055	87.9977	89.4737
115.266	92.5193	89.6739	78.8393	88.5494	82.9992	92.207
118.432	89.4939	81.5217	84.9107	94.8527	91.4713	86.7403
121.612	85.2035	91.4251	75.119	91.2744	88.2237	90.0552
124.821	82.4257	90.1268	87.0238	82.3562	95.538	93.2248
128.015	86.5237	89.9758	79.7321	86.54	97.4866	84.4432
131.203	86.6062	89.221	90.6845	92.7608	85.3149	88.0198
134.385	92.7393	97.0411	84.1964	86.9254	88.026	86.5949
137.671	85.4235	93.2971	87.1131	87.6961	88.7885	91.0148
140.87	85.9186	87.4396	75.6845	92.7333	88.1389	90.1425
144.058	90.2365	88.2548	81.369	89.21	92.2621	88.5141
147.271	89.714	98.1582	80.0595	93.4214	92.6857	90.3751
150.498	92.0242	90.5193	91.4881	89.1825	93.9283	91.073
153.686	87.9538	94.2633	78.5714	88.109	93.0528	85.6935
156.873	84.0484	90.6703	84.7024	88.4393	88.9014	86.4786
160.068	92.3542	90.9722	83.6905	92.7608	93.9283	86.1878
163.235	87.7888	95.1087	82.381	89.8706	87.207	87.002
166.42	90.8691	84.1486	79.494	90.311	95.8486	84.0942
169.59	91.9417	90.2778	81.2798	84.2279	88.4778	90.9276
172.789	93.6744	86.6546	80.3274	87.4759	91.076	85.8098
176.005	84.0759	98.1884	77.1131	83.4572	90.3417	88.1652
179.179	81.4081	95.4106	89.1071	98.0457	88.4496	88.2815
182.348	92.6568	92.1196	80	86.5951	87.5741	95.0858
185.548	89.7415	85.8998	81.4583	88.0539	91.4431	86.1878
188.743	88.3388	88.9795	78.9286	92.0176	93.2505	91.9744
191.929	84.6535	99.4263	85.119	94.7426	91.8949	90.2297
195.095	87.7063	89.3116	78.1845	92.403	90.0311	82.9311
198.284	88.2288	90.7307	86.3393	100	93.7023	86.624
201.501	86.1111	91.244	82.9464	85.439	87.913	90.1425
204.712	100	84.994	78.0655	86.2097	89.7769	87.6127
207.895	93.6469	92.8442	75.4167	93.8343	84.7501	86.3042
211.112	87.2937	88.285	84.1369	83.292	100	93.1085
214.284	89.714	87.5604	89.2857	91.5222	96.8935	78.5112
217.51	88.1738	97.9771	84.4345	91.7974	88.2801	88.2233
220.678	80.4455	90.0362	80.7143	93.5866	86.2751	82.2332
223.848	91.3641	88.8889	81.2798	89.6504	91.1324	93.1666
227.06	80.6656	86.1111	88.6012	91.1093	85.7103	82.2041
230.292	86.7712	85.7488	88.2143	84.7784	89.6639	84.4141
233.453	87.8163	87.7717	86.9048	95.2656	94.2672	83.28
236.632	88.7514	90.006	81.6667	85.0812	92.0926	83.0183
239.794	86.5512	95.471	79.4048	84.1178	90.0028	84.9956
243.007	91.0616	90.7307	86.994	90.6689	90.7371	89.6191
246.193	79.7855	80.465	79.1667	91.5222	94.4648	84.8212
249.388	87.5688	93.9915	86.875	87.2557	86.7552	89.8517
252.559	84.9835	91.093	77.2619	94.1921	94.5496	89.9389
255.766	88.5039	79.8007	79.0179	86.1547	87.3764	82.0297
259.007	87.7888	89.4324	79.6131	92.5957	89.4663	90.695
262.235	88.6689	91.1232	80.7143	89.9532	84.6371	87.3801
265.442	89.2189	87.9831	77.8274	91.2194	85.9644	88.2815
268.662	91.2266	86.1413	81.9048	92.9535	94.126	82.1169
271.82	93.4818	92.2705	81.4583	89.7055	90.5959	94.039
275.008	84.5435	91.2742	90.2679	87.2557	91.3584	86.6531
278.21	90.2915	91.1534	74.5833	91.4121	92.4315	83.1637
281.455	87.2112	93.4481	78.75	90.5312	92.375	83.2509
284.656	89.2464	88.3756	86.1607	90.0358	86.3315	87.1474
287.858	91.1716	87.9227	84.3452	92.1552	89.2968	89.4155
291.049	84.3509	96.0145	86.5774	85.7969	91.0477	82.6985
294.215	89.3289	91.4855	81.5476	82.6865	86.8964	94.9985
297.403	88.6139	92.4215	84.7321	82.659	89.9463	89.4446
300.621	84.846	92.2705	79.256	91.3295	90.85	88.2233
303.791	86.1936	80.2234	80.8631	91.6598	89.7204	80.0523
306.986	91.1441	87.8623	85.625	87.8337	90.85	92.0907
310.164	84.3784	87.5	85.9524	85.6592	94.8037	85.9261
313.33	85.5611	91.6365	82.5298	90.1459	90.6524	87.7581
316.515	89.659	87.1981	85.8631	94.7977	94.3801	90.7531
319.706	85.6436	83.0012	75.3274	89.0173	86.9528	82.902
322.894	88.2563	91.7271	80.119	84.4206	85.3714	92.4687
326.099	85.4235	95.3502	83.1548	87.6411	91.4149	94.2425
329.356	79.7855	91.093	82.4405	89.21	90.3417	84.007
332.558	86.4136	83.756	77.5298	92.4305	89.0144	84.2687
335.772	89.934	93.75	78.1548	88.3292	92.375	87.5545
338.972	92.0517	91.0326	77.381	91.1093	87.0376	80.1977
342.188	85.066	92.1196	82.7381	86.7052	86.1903	82.4949
345.383	91.4741	88.285	79.4345	90.7514	83.9876	79.1218
348.583	88.9714	89.221	80.2381	89.21	91.3866	84.8502
351.807	90.6216	85.6582	83.75	81.6405	87.7718	87.2056
354.988	83.4708	82.1256	77.6786	93.3664	91.3866	90.5787
358.191	91.3091	88.2246	71.369	89.9807	91.1607	88.107
361.367	81.4356	88.4662	81.9643	83.9802	95.3121	82.3204
364.548	84.8735	88.3454	81.0417	89.1825	84.27	83.3382
367.732	85.286	88.9493	76.25	95.2381	92.6574	85.2573
370.922	89.3839	88.3756	78.244	91.9626	83.7052	84.8793
374.137	80.088	85.93	83.0952	90.1459	94.0695	86.3623
377.36	92.9043	91.9082	81.6369	87.7512	89.1274	82.4949
380.552	82.5633	87.8321	74.3452	96.9447	83.4792	84.9956
383.801	85.0385	93.599	77.0238	90.5312	89.0991	89.4737
386.975	80.9131	88.3454	82.4107	93.5866	88.1107	84.8793
390.217	81.2156	89.6437	78.244	88.0815	85.3431	81.9424
393.389	91.3091	78.6232	79.7321	89.0173	91.2737	95.2603
396.625	90.7041	84.2089	78.8988	82.9342	89.9463	86.5949
399.827	82.2607	86.2319	83.1548	90.3936	91.2454	84.2105
403.035	88.7514	88.1944	77.619	96.2565	92.7422	88.3396
406.22	81.1056	90.4891	82.8571	90.9441	93.307	79.6162
409.406	89.5215	85.2657	85	89.6229	95.0014	86.0715
412.615	81.8757	89.3418	74.2857	90.311	90.4829	89.3283
415.791	87.8163	92.2403	78.6607	83.6224	85.6538	81.1282
418.977	92.6018	83.9674	83.7202	91.8249	95.5662	87.9616
422.153	86.5512	93.5386	72.8571	86.6777	93.2505	85.0829
425.358	84.846	90.7609	70.6845	87.8337	86.3315	87.9035
428.56	89.604	86.2923	78.4524	89.4027	87.2352	84.2687
431.767	92.2442	87.3188	75.9524	92.403	90.7936	87.729
434.947	87.7338	88.4964	85.2976	86.2373	91.4149	82.6403
438.133	84.2684	93.5386	83.1548	91.5222	86.7269	81.797
441.31	85.9736	85.8696	79.8214	91.8249	91.6973	90.2588
444.493	91.2266	88.6171	82.2619	89.9807	85.9079	82.5821
447.709	90.7316	82.0954	77.2619	82.3011	87.8848	89.59
450.879	83.6359	84.9336	77.1726	89.4302	91.9797	84.4722
454.117	86.1111	85.9903	79.7917	90.4762	95.6509	85.7517
457.292	90.7316	93.3273	82.1131	93.3939	91.6973	82.2041
460.478	79.703	87.8925	86.5476	91.4671	91.5843	85.8971
463.649	82.6458	90.3986	78.9583	92.7058	84.9478	86.7694
466.846	83.1408	90.0664	73.9286	87.063	85.6255	96.8596
470.012	89.1914	83.7258	81.3988	87.6961	89.8899	84.007
473.186	88.3113	84.8732	72.6786	86.6502	90.963	82.1169
476.387	90.5391	83.4239	77.2024	85.7693	93.1375	83.0183
479.549	86.8537	92.7536	80.2381	87.4759	86.5292	83.0183
482.723	87.1287	93.2367	79.881	93.4765	83.1121	85.1992
485.923	82.7558	87.651	79.3452	86.6226	92.8269	84.6467
489.121	86.0286	82.1558	81.0417	88.3567	87.6306	86.8857
492.308	80.143	98.3696	83.0952	91.6873	91.7537	83.9779
495.511	81.8482	86.3829	78.75	89.1825	89.6639	85.112
498.678	84.0484	93.7198	81.875	92.0451	83.2533	87.3801
501.859	81.2156	86.8357	75.8929	87.3933	88.5343	84.6467
505.049	87.8163	82.2464	76.8452	88.9623	92.7422	82.2914
508.263	83.1683	92.2101	76.4583	89.8706	89.4663	87.1765
511.494	83.1683	83.122	80.625	91.7424	88.9014	87.5545
514.668	79.8405	78.0797	75.2976	93.2012	91.1607	86.6822
517.928	83.1408	84.8732	84.2857	93.559	93.4199	86.6531
521.101	89.0814	83.6655	77.5595	86.2373	91.669	85.7517
524.268	80.8306	81.2802	71.6369	86.9529	88.6473	83.9779
527.455	87.6238	84.4505	79.256	93.9994	91.3301	82.2332
530.62	82.6733	87.1981	79.8512	89.2926	94.2672	87.4673
533.825	86.1936	85.5072	75.9226	93.4765	88.5061	88.834
537.002	86.2486	86.5942	78.3333	89.4853	91.0477	87.8162
540.221	80.8581	88.8285	76.8452	88.4668	84.1288	82.9311
543.451	79.8405	88.3454	77.0536	90.2009	91.782	88.0779
546.644	88.4488	86.4432	80.5952	92.4855	84.8066	84.385
549.857	80.9956	89.7343	78.4226	89.2375	89.8899	86.1297
553.059	88.3113	86.1413	86.4583	85.962	88.1672	86.1588
556.253	85.9461	83.2428	81.131	86.9529	90.85	79.936
559.49	84.7635	85.1751	79.1964	92.7058	88.0542	86.8276
562.697	83.3608	85.4469	70.119	85.1638	90.37	85.6063
565.874	88.0913	81.6425	78.2738	88.8797	89.0709	83.629
569.042	88.7514	85.93	75.9821	93.6691	92.9681	84.9956
572.245	88.2013	86.8357	77.0833	85.1087	85.9644	89.1247
575.418	81.6832	84.843	75.4167	89.6504	91.0477	80.9828
578.634	85.8086	88.8889	83.75	82.4938	82.2367	86.5949
581.824	85.6711	77.8382	72.9762	84.2554	86.3033	85.3446
585.001	85.396	75.6039	76.3095	88.1641	89.8051	85.6354
588.198	79.0704	87.3792	76.1905	88.9348	90.3982	84.5013
591.383	86.7987	83.0314	76.0714	90.1184	90.4264	89.0084
594.616	85.231	84.2693	72.3512	90.5863	89.2686	85.0247
597.823	87.3212	83.3937	71.131	85.5216	80.7964	89.6482
601	85.9736	83.2428	77.4405	94.4123	88.5908	83.3963
604.194	79.538	94.2935	79.5238	89.733	96.7523	80.4885
607.365	84.1309	90.5797	72.4405	92.8434	89.438	84.8793
610.552	88.1463	89.0097	79.6131	89.678	90.0028	89.1538
613.751	79.6205	87.0773	80.625	83.4021	87.913	80.3722
616.932	84.791	88.0435	73.3333	83.76	91.9232	80.8665
620.11	82.8383	82.3671	76.4583	93.3664	89.325	82.2332
623.315	81.9307	91.9686	80.5655	90.5863	83.4792	86.6822
626.499	79.0704	83.907	79.3155	84.3931	92.7422	87.5545
629.689	80.143	88.4964	77.381	85.384	87.9413	83.1928
632.886	81.9307	82.6691	88.3631	89.21	84.976	79.4417
636.053	82.7833	83.6051	77.3214	91.1919	95.4533	87.351
639.225	82.3157	82.7597	76.6369	88.1365	88.3366	80.4594
642.491	81.0781	82.4879	75.5357	89.2926	85.1737	82.5821
645.67	83.8284	81.0688	72.0833	87.531	93.8153	79.2382
648.857	87.0737	85.2355	74.0476	91.0818	87.4894	83.9488
652.041	80.4455	84.9638	79.9405	96.5043	82.8015	87.351
655.294	87.4037	85.4771	78.8988	87.9714	87.6589	82.6403
658.477	81.1606	88.7379	77.9464	86.5951	88.7885	86.4786
661.662	76.8702	85.2959	76.1607	94.1921	89.438	87.2637
664.878	84.1034	87.0773	77.2917	85.907	91.4996	82.4077
668.061	76.5127	83.6957	81.25	89.21	90.7936	81.9424
671.245	86.2486	81.7633	76.6964	91.1643	84.2417	86.6822
674.441	85.8086	84.5109	73.6607	92.1828	84.8066	82.9311
677.627	84.956	82.7597	73.4821	87.531	92.8269	85.6935
680.81	85.7261	86.413	78.9881	80.8973	84.6653	82.6112
684.013	77.6678	88.8889	76.0119	94.1921	91.7537	84.7921
687.219	86.1936	85.3563	78.4821	85.1363	88.3366	81.0119
690.417	82.2882	88.0435	74.1369	89.733	92.488	88.6595
693.584	79.8955	80.3744	76.6964	80.5395	87.3764	81.1282
696.778	82.0407	83.122	70.9821	84.5307	88.3649	84.6758
699.943	85.5336	75.7548	74.4643	91.4396	85.3996	83.4836
703.14	78.0528	85.5676	75.625	86.9529	83.7334	82.8729
706.321	84.901	87.9529	72.4702	89.3201	92.601	81.5935
709.512	81.3806	80.314	78.75	84.6408	81.9543	81.0119
712.695	82.5908	78.8647	76.131	88.3567	85.4561	81.419
715.876	83.3883	83.9372	74.375	91.6047	91.7255	78.6566
719.049	84.1034	90.0664	76.1607	85.5767	90.7936	82.3495
722.23	90.8966	88.1341	81.131	97.853	88.1954	92.1198
725.467	78.1628	73.7923	72.4702	94.3848	86.6987	85.8971
728.653	81.7107	86.7452	79.8512	85.5216	90.7936	83.2219
731.847	85.8086	80.8575	75.8929	85.5767	89.1838	81.0119
735.083	84.571	87.5302	75.3571	83.7325	89.9181	86.3623
738.3	79.0429	86.8357	79.0774	89.2926	86.501	84.5304
741.487	84.1584	86.8961	74.256	85.4666	82.7732	81.8261
744.657	81.7107	93.3273	76.994	87.1456	87.9977	86.4495
747.861	81.5732	87.8019	79.0476	85.9895	91.782	79.6452
751.046	82.9208	90.7005	75.5952	84.5582	86.7269	83.7162
754.235	87.1562	90.2476	73.5417	91.6873	88.1107	83.0474
757.41	83.6909	85.6582	75.5655	93.6416	81.926	78.3367
760.613	75.1925	87.8925	75.0595	94.3298	86.1056	83.2509
763.772	80.9131	79.4686	80.2679	83.0443	86.4727	85.49
766.956	76.9527	86.6848	73.869	88.6045	79.1867	89.2411
770.126	81.5457	79.0761	80.7738	90.6138	86.8964	76.4176
773.323	83.4433	78.1703	72.0238	91.357	88.1672	88.1361
776.545	82.8383	84.6316	73.8095	92.7608	85.5126	75.4871
779.725	79.2079	86.3829	72.9464	87.2832	94.6625	79.1218
782.894	88.0088	77.1135	72.5893	88.0264	92.0926	86.3042
786.159	87.8163	83.6051	76.9643	85.2464	87.1505	87.8162
789.325	80.0055	80.7669	79.7619	92.5681	84.1288	80.5757
792.494	84.1034	86.9263	73.1548	89.4302	91.8385	78.075
795.704	84.2959	74.3056	73.1548	86.6777	89.1838	88.0489
798.884	80.9131	84.2995	76.6369	85.1363	87.0376	83.3382
802.052	81.1606	88.1341	71.2202	85.2464	80.2598	86.1297
805.269	85.0935	81.7935	73.869	88.1641	86.7834	84.2978
808.468	86.0286	85.4771	72.4405	92.3479	85.9079	87.002
811.66	79.8955	79.378	71.4286	89.3476	84.5806	82.0587
814.853	80.1155	85.6582	71.4583	90.5863	85.2866	83.2219
818.05	75.44	85.5374	67.6786	85.2188	87.6024	77.0573
821.216	82.3157	83.8768	75.1786	85.2739	86.4445	85.7226
824.46	86.7987	79.8611	81.6964	91.8525	92.9963	87.1183
827.652	85.9736	84.6316	74.3452	85.2188	91.0195	84.6758
830.813	81.1606	79.7403	75.119	92.1552	83.6769	80.9538
833.99	85.0385	84.6316	74.7024	91.5222	90.5394	86.2169
837.173	84.4059	83.4239	74.0476	87.063	87.4329	87.2347
840.346	74.0099	78.1401	77.0238	96.3391	87.32	89.212
843.553	81.6557	88.1944	73.2143	92.8434	85.3714	83.5999
846.718	83.1683	90.8816	70.4762	89.155	88.7038	84.5013
849.892	83.4708	84.058	74.6131	90.8065	90.5676	86.4495
853.079	81.1606	80.2838	76.3393	84.338	88.1107	87.0602
856.249	84.516	84.2391	80.3869	92.458	86.0491	85.7808
859.462	78.7679	83.907	80.3274	89.6229	84.1288	84.5304
862.631	81.0231	90.3382	80.4464	86.0996	84.4112	85.868
865.826	84.9835	82.5181	76.994	90.5037	85.9079	88.0198
869.027	79.2629	83.756	78.3631	96.0639	83.6769	82.7275
872.231	81.2706	85.8394	72.5	90.834	81.9543	84.6176
875.393	79.8955	89.6739	70.3571	91.0818	80.4857	80.663
878.628	74.4224	80.0121	76.9345	85.9895	82.8297	86.7694
881.813	81.9857	78.4118	71.4583	86.54	85.2584	84.3559
884.992	80.3355	86.9867	80.744	90.7239	86.4445	79.6162
888.159	86.4961	79.3478	72.9167	93.7517	83.564	85.8971
891.349	79.593	81.6123	74.8214	82.8792	86.4727	77.5516
894.533	79.7855	79.6498	78.869	89.5679	80.2033	81.5644
897.759	82.0132	78.8949	78.0357	89.4027	90.0028	82.2623
900.934	81.1331	82.2162	76.7857	89.6229	86.9246	75.7488
904.119	79.538	76.8116	72.2917	86.1547	86.6987	80.5757
907.304	84.1309	84.6618	76.131	87.6961	83.564	84.9084
910.465	88.6139	72.1316	79.9107	97.1649	92.7422	80.9828
913.659	81.8757	86.3527	73.4524	95.0729	96.6958	79.8779
916.845	84.2409	85.0845	77.7976	93.6691	83.9029	89.1247
920.028	77.2827	84.4203	79.5238	83.4572	90.7936	78.7438
923.204	78.0253	91.0326	75.6548	88.7696	92.0644	83.8034
926.384	82.0132	81.1292	75.4167	90.779	87.9977	88.4559
929.554	80.8031	79.529	83.5119	85.4941	89.5792	75.458
932.796	82.0132	84.994	73.0952	85.8244	96.4417	80.9828
935.97	76.5402	87.651	73.6607	87.0906	88.1954	77.3481
939.139	79.1254	75.3623	74.6429	89.3476	82.8015	80.8084
942.338	74.6425	76.7512	77.5	88.7421	88.1107	75.6615
945.546	81.1606	85.628	71.1012	89.6229	85.682	83.28
948.717	84.7635	84.4807	76.8155	87.8613	77.9723	83.1637
951.946	89.2189	82.4275	67.6786	95.6785	90.6806	84.5013
955.136	78.2453	83.0918	78.244	83.4297	85.2302	80.663
958.315	84.3234	83.8768	73.0952	85.907	87.3764	79.3254
961.535	81.9307	85.2053	73.3929	87.3383	91.6408	77.1736
964.702	81.0781	84.843	76.9643	87.6686	86.4727	87.2637
967.875	82.0682	84.1787	77.0238	87.3108	80.2316	80.5176
971.091	77.8053	78.1703	79.8512	94.0545	88.1672	82.3786
974.298	83.4983	79.8913	75.9821	88.7146	82.8297	85.3446
977.486	73.3773	79.4082	72.3214	90.4211	87.0376	79.7034
980.646	77.8878	77.808	78.4524	88.7971	83.8464	86.1006
983.827	90.264	86.6848	73.0952	91.935	84.9478	83.5708
986.997	80.1155	80.5254	78.4226	88.687	89.6639	80.7793
990.2	76.7877	82.035	73.0655	87.8062	91.5843	83.9197
993.386	82.1507	80.4348	76.131	82.3837	90.2287	83.8034
996.62	81.7107	70.0785	74.5536	87.3933	91.3866	90.5496
999.796	79.2904	80.8877	77.6488	90.9716	83.8746	82.4658
1002.98	84.2134	81.5821	77.9464	93.5866	83.6487	82.5821
1006.14	80.5006	88.1341	77.9167	93.3113	80.0621	89.0666
1009.36	79.4829	78.6232	70.744	82.9342	88.0825	82.0878
1012.54	85.3685	81.3104	67.4107	84.916	91.1607	85.4318
1015.72	70.4895	77.8382	72.4107	84.7784	85.2019	80.2268
1018.9	79.0704	87.651	71.3393	86.2923	89.0709	82.2914
1022.12	81.8482	80.8575	71.9345	93.2563	88.7602	86.2169
1025.3	79.4554	84.3599	76.1905	89.155	82.9709	82.0006
1028.47	76.2376	79.3176	76.4286	86.7327	88.7602	84.2396
1031.69	85.7261	80.7367	73.6012	85.6868	83.6769	90.1716
1034.88	77.5578	81.2802	72.6488	81.7506	86.9811	78.802
1038.06	84.2684	77.0229	71.5179	84.2279	84.9195	79.7325
1041.27	77.6403	78.744	74.2262	78.9981	79.5256	87.4382
1044.44	82.1782	81.3104	72.1131	87.4484	83.6487	85.8098
1047.63	84.736	78.6232	68.631	88.3567	88.9014	83.0765
1050.81	82.2057	78.8949	73.3929	82.9342	87.4894	87.0602
1054	87.8438	81.7935	68.244	84.4481	85.3996	79.7906
1057.2	82.5633	80.8575	77.6786	88.9623	84.4677	84.6176
1060.38	79.758	84.0882	76.8155	91.0267	88.845	77.319
1063.56	77.8328	80.9179	77.0536	88.1916	85.8232	84.2978
1066.73	77.9153	86.1111	71.7857	84.5307	87.8001	86.3042
1069.92	76.1001	83.2428	68.8393	85.439	81.333	79.4999
1073.1	79.0979	80.7367	75.4762	90.6689	84.8066	85.3446
1076.27	80.088	76.57	78.8095	89.6504	81.5589	86.6531
1079.46	80.5281	92.4215	75.8631	87.2557	86.6704	85.7517
1082.67	84.3784	80.6159	75.2083	90.3936	90.2287	78.7147
1085.87	80.6106	88.7681	70.8333	88.7696	88.1107	76.941
1089.1	81.6557	76.872	68.006	85.0812	80.3728	83.4836
1092.29	77.5578	84.6618	73.9881	85.962	84.6936	88.0779
1095.47	78.6579	79.4988	77.3512	87.0906	84.3547	82.8148
1098.65	75.7976	82.2464	68.9583	89.6504	89.4663	86.5949
1101.84	75.275	77.5664	72.8274	89.1825	89.2121	83.5999
1105	79.0704	84.4203	74.1369	91.2744	89.8334	81.7389
1108.2	78.8504	84.6316	73.2738	89.6504	82.8862	86.4786
1111.38	81.7107	80.5857	67.7976	87.531	84.976	81.2736
1114.6	77.4477	83.9674	71.9048	86.6502	91.2172	87.4091
1117.78	80.473	82.8804	67.9167	91.88	91.5561	74.0913
1121	77.5578	74.9396	65.0893	96.9447	84.5241	79.6743
1124.26	77.4202	80.0121	72.1726	87.0906	84.9195	83.5126
1127.44	80.088	85.6582	70.625	87.1456	86.388	88.6595
1130.62	73.7624	82.971	74.8512	86.0171	88.732	81.3027
1133.81	79.4829	84.2391	71.5774	85.3289	86.5575	79.3835
1137	83.8009	85.5072	70.3869	87.4484	85.0042	81.3027
1140.2	79.2904	79.8611	77.7679	84.2004	84.2982	80.2268
1143.38	76.1551	80.1027	75.9524	84.9711	87.9695	86.1588
1146.59	75.8251	83.3031	71.994	88.9348	84.6371	77.6098
1149.84	77.2827	78.5326	71.1012	90.0908	79.4973	81.8261
1153.04	77.9703	78.3816	71.8155	88.687	85.9079	85.3446
1156.22	77.6953	81.1896	74.2857	85.2188	79.4973	79.18
1159.4	78.7404	79.0157	76.5476	88.7146	90.4547	77.8424
1162.58	77.4752	75.5133	69.5536	87.1181	80.9658	86.4205
1165.78	77.4202	80.6461	76.9048	81.8057	81.1353	75.458
1168.94	78.6854	75.2114	75.3274	82.3562	83.8746	79.6162
1172.17	75	80.8575	68.6607	90.5863	82.7732	83.3963
1175.34	85.066	75.785	72.3214	92.4855	86.8399	76.4176
1178.52	80.9131	86.4432	70.5952	86.8979	85.569	80.9538
1181.69	75.3025	82.971	74.1667	92.3479	84.8348	76.9991
1184.87	78.4378	79.2874	77.619	82.9893	87.913	77.2318
1188.06	75.22	80.5857	75.1786	94.4949	86.8681	84.1524
1191.25	83.7734	86.9263	74.3452	89.1825	84.5241	82.0587
1194.43	83.1683	92.3309	72.3512	83.4572	81.3612	82.9311
1197.6	81.0506	75.5133	78.0357	88.4118	88.7602	91.4801
1200.79	82.7558	81.7029	74.6131	86.7327	82.2367	84.0942
1203.99	82.0957	83.3635	68.1548	85.6317	96.4134	82.4949
1207.17	86.4686	79.5592	74.1964	86.5676	79.8927	80.3722
1210.38	79.2079	76.4795	70.1488	86.8979	82.8579	83.658
1213.57	78.7679	82.8804	65.8631	82.5764	79.4973	78.2495
1216.75	79.1804	80.9179	77.2619	80.7872	84.863	79.4999
1219.96	76.4576	84.3901	76.7857	85.1913	84.0158	85.9843
1223.14	81.3256	79.7705	67.3512	87.1456	82.3779	84.2396
1226.31	74.945	82.1256	69.8214	85.1363	89.4945	84.1524
1229.5	86.1661	79.0157	68.2738	86.8428	85.5126	80.9247
1232.68	70.7646	82.9408	71.1012	84.9986	89.551	79.6452
1235.86	82.6733	79.4988	71.2798	81.1451	86.6987	80.4885
1239.02	76.2376	78.9251	70.5952	86.0446	88.7885	83.3673
1242.21	79.2354	73.0072	71.9048	90.5037	87.9977	83.7453
1245.43	74.4774	84.7826	72.4405	85.3565	83.6769	84.6758
1248.63	76.5402	84.3901	73.3631	82.659	84.4959	85.8971
1251.82	77.6953	77.8382	74.2857	88.4118	90.37	78.8892
1254.99	79.4279	75.4529	75.8036	84.6683	85.2584	84.0361
1258.17	82.8383	86.5338	72.3214	84.0077	87.1223	76.97
1261.36	74.4774	77.8986	69.6726	89.733	79.808	77.1154
1264.56	77.0902	83.9976	77.3214	89.3201	90.0875	81.9715
1267.77	72.9923	76.5399	70.4464	85.7143	87.8565	88.6595
1270.97	81.4356	85.8696	70.5952	92.4855	87.9695	84.2687
1274.13	76.9802	82.4879	69.7321	84.0903	83.5357	79.6452
1277.34	72.8823	80.2234	68.5119	89.8982	79.8644	79.8488
1280.55	75.9351	80.4952	71.4583	86.4024	86.2468	79.9651
1283.77	73.0748	76.1171	74.9702	92.0451	93.1658	85.4318
1287	79.978	83.1824	68.1845	81.9433	83.8746	84.2687
1290.18	77.9703	74.6679	69.1964	89.6229	82.745	85.6063
1293.37	76.8702	82.0652	74.7024	85.7969	82.5191	77.8715
1296.55	74.9175	77.4457	72.2321	87.3383	80.9376	78.1913
1299.73	74.7525	82.5785	70.0893	87.2832	88.4496	81.7098
1303	77.3377	74.7283	70.5357	87.4209	84.8913	85.2573
1306.17	77.8603	84.8128	65.0298	87.8062	88.8167	84.5595
1309.38	80.9406	75.4831	69.5833	85.8794	83.2533	80.8084
1312.61	76.6502	79.6498	64.8512	86.2373	84.8066	81.1864
1315.78	79.3729	78.8949	74.1964	83.237	85.0042	79.936
1318.97	80.1705	77.1437	72.619	88.9623	80.4575	78.2786
1322.16	78.6579	80.2838	76.369	82.8516	87.4894	82.7566
1325.38	79.5105	78.2307	70.3274	88.5769	80.9658	83.7744
1328.68	79.4829	92.9348	76.6369	84.4481	82.3779	85.519
1331.92	69.6645	80.4952	74.7917	86.9805	81.5589	81.4772
1335.1	77.1452	80.314	72.2619	81.3653	82.5473	83.4545
1338.27	83.6359	76.9324	71.4583	90.834	85.3714	79.936
1341.48	78.2178	79.6196	73.6012	85.1638	80.8529	86.2169
1344.66	72.8548	78.8043	74.6131	88.687	93.3635	84.8212
1347.84	75.8801	77.6872	72.1726	84.0352	79.7515	83.1056
1351.07	75.6051	79.1365	69.0179	85.1087	81.3047	80.4594
1354.28	79.4554	80.0121	70.4762	93.7517	93.0811	81.8552
1357.46	69.0594	81.5217	72.3214	87.5034	85.5408	84.0361
1360.67	79.4554	83.7862	72.7679	91.1643	83.9876	83.1928
1363.85	85.3685	81.8539	72.1131	92.6782	89.2686	85.5481
1367.04	78.9329	77.8382	71.6369	84.6683	83.7616	77.2318
1370.23	79.4829	85.4469	77.2917	89.7881	79.2432	81.5063
1373.41	72.4422	81.4614	77.9167	82.8516	79.3279	80.0523
1376.61	78.6854	70.7428	76.9643	81.8057	86.614	77.7842
1379.79	75.9901	78.5628	76.1905	90.0908	92.375	84.1233
1382.99	77.8878	77.4457	72.5	95.3757	81.5871	78.9474
1386.19	82.2607	77.4155	67.1429	86.7878	85.089	81.3609
1389.37	81.8207	78.9855	72.4405	83.2095	84.3265	77.3771
1392.56	79.8955	84.9638	72.7083	93.5315	84.157	82.2041
1395.74	74.2024	80.2536	73.6012	84.5857	82.2367	76.97
1398.92	77.8053	73.4601	70.3571	89.8431	89.0709	78.6566
1402.13	80.1705	84.8732	73.2143	84.861	84.863	76.3303
1405.32	72.3872	84.2995	71.1012	85.7969	81.6436	78.8601
1408.49	69.1144	83.0918	72.619	90.9716	80.8246	81.6226
1411.68	83.0583	83.6957	74.9405	88.5769	80.2316	80.4885
1414.88	81.2706	80.9481	78.4821	93.1186	81.7283	81.7389
1418.07	70.8746	80.1932	66.7262	88.5769	79.0455	90.4333
1421.28	76.7877	80.5857	73.4226	93.7242	87.0658	81.3609
1424.5	75.055	84.7826	78.244	89.4027	85.089	87.6708
1427.7	77.1177	82.1558	70.3571	81.09	82.6038	81.1864
1430.89	80.5831	77.2947	71.756	84.6408	76.9839	83.2509
1434.08	78.7129	78.0797	74.6131	88.0264	87.7436	83.9197
1437.31	76.8152	79.2271	77.7976	83.8976	83.2533	76.8828
1440.52	77.9703	79.4988	68.4226	93.0636	92.5727	79.4417
1443.69	79.2079	79.2874	70.2679	80.8148	80.5705	83.8034
1446.87	76.7602	87.1981	70.1786	85.7693	89.7204	82.4658
1450.06	74.6975	77.9891	68.8393	82.136	82.3496	84.0651
1453.27	83.1133	78.0495	74.2857	92.1277	83.9593	85.3737
1456.44	78.0528	80.6763	72.0833	87.1731	88.7885	82.6985
1459.6	73.7349	80.6461	73.5119	86.5676	84.976	80.6048
1462.79	77.4752	77.0229	76.4286	85.907	82.5755	83.658
1465.98	83.8009	78.1099	71.994	86.6502	80.4857	81.1282
1469.17	77.8328	81.1594	70.5357	80.1541	83.451	77.7261
1472.35	77.3102	76.3587	67.6488	91.4671	80.0339	83.658
1475.54	75.3575	81.8539	69.1369	85.907	88.1107	80.9247
1478.71	79.1254	78.5326	75.5655	81.613	84.3547	85.0829
1481.88	79.0154	85.2355	70.6845	84.5032	84.5806	84.0361
1485.04	73.3223	72.4034	71.875	82.714	82.2084	82.6694
1488.21	79.3729	76.1473	68.631	88.4668	82.745	87.5254
1491.42	75.8251	85.1147	73.7798	85.962	87.7153	82.4949
1494.63	74.2024	80.7971	71.0714	88.3292	83.2251	77.319
1497.83	78.7129	76.872	73.8095	86.1272	85.1172	80.8375
1501.04	79.3179	79.2572	74.5536	82.6039	85.569	78.2204
1504.21	78.8229	78.9553	75.3571	84.4756	82.1237	81.041
1507.39	77.6678	83.3031	70.3869	98.1833	81.5024	87.4382
1510.66	73.0473	78.8345	70.2381	89.1274	87.3764	82.8438
1513.85	80.6106	79.2874	64.0179	83.9802	82.0107	84.7339
1517.04	72.6898	73.6413	73.2143	82.9893	80.1751	79.1218
1520.23	80.5556	76.8418	79.0774	89.2375	90.6524	82.2332
1523.42	75.6876	88.8587	70.9226	91.1368	80.4575	78.8601
1526.61	71.8922	86.2017	75.5655	82.5764	84.5241	82.5531
1529.81	77.3652	77.2645	73.8393	78.7228	88.2519	80.9828
1533.02	79.813	80.4348	65.8631	92.1552	89.2403	78.3658
1536.23	77.5578	77.5966	75.2976	85.2464	84.8913	79.5871
1539.42	69.802	82.4275	73.3333	87.8613	88.3366	79.6452
1542.59	73.4598	79.4988	69.7024	83.815	89.0426	79.7325
1545.76	78.5479	71.6787	68.3333	84.916	86.6704	79.3835
1548.94	75.5226	85.93	74.3155	83.8976	84.5241	78.3367
1552.18	77.5303	74.5773	70.5655	86.0996	85.1454	79.6162
1555.39	81.6832	83.2729	70.3869	84.8335	83.8464	86.0715
1558.59	78.1078	84.3901	68.6607	82.2461	86.2751	84.9375
1561.76	75.7151	79.9819	75.9821	85.9895	87.3764	87.6999
1564.96	75.6326	78.8949	62.7083	81.9433	85.2584	83.0183
1568.15	78.1628	76.0266	70.8929	84.9436	81.1353	81.9133
1571.37	78.1903	80.2536	74.256	86.5676	76.4473	85.4318
1574.56	74.1474	77.0229	71.369	83.292	78.9607	76.7665
1577.74	83.9109	82.1256	75.625	86.1822	80.2598	82.6985
1580.99	75.7151	80.5254	77.8571	93.8343	83.6487	81.1282
1584.17	76.9252	79.7101	69.1071	85.3565	85.9644	80.1687
1587.36	74.6975	78.9553	70.4464	81.7231	86.3033	78.5403
1590.53	74.4224	74.8188	72.5	84.9436	81.3612	75.6034
1593.71	74.2024	76.2077	69.5833	92.1828	82.632	82.3204
1596.89	74.4224	80.0423	66.0714	83.0168	79.4973	80.7502
1600.07	71.5347	85.5978	69.7024	86.9529	86.9246	84.5013
1603.28	80.2805	86.2017	73.4226	84.5307	81.4742	80.2268
1606.46	73.3498	84.0278	69.1071	80.9524	86.3598	77.9878
1609.63	75.7701	79.378	69.5536	87.063	86.3315	79.7325
1612.81	80.8031	82.971	71.8452	88.3567	77.7464	85.3737
1616.02	73.2673	77.0531	71.131	83.5398	79.2714	86.5949
1619.21	76.8702	80.8877	66.1012	84.6958	82.745	80.5757
1622.38	76.9252	81.1896	73.6012	82.8516	81.0506	79.4417
1625.56	80.6931	83.4843	71.2798	92.5957	85.4561	82.8729
1628.72	69.1969	81.7935	82.7976	88.4118	87.1223	78.6566
1631.9	77.3652	79.4686	73.1845	89.0999	89.6357	79.558
1635.11	79.4554	85.9903	77.3512	80.567	89.325	88.7177
1638.31	78.9329	77.657	66.7262	85.0537	85.0607	75.109
1641.51	85.5611	77.5966	74.4048	80.7322	81.1635	82.0587
1644.69	76.4301	78.9553	73.9286	80.2918	80.7964	78.2786
1647.89	77.0627	76.2681	76.131	76.2455	82.4343	74.4112
1651.07	70.3795	80.7367	72.381	89.5403	79.7797	75.1963
1654.27	76.4026	75.0604	74.1071	77.2364	81.8978	79.2672
1657.45	74.2849	84.4807	70.7143	85.5491	83.4792	80.1687
1660.63	75.6051	82.6087	67.0536	88.0264	82.9144	85.868
1663.82	73.0198	77.2041	72.381	82.4938	82.2367	84.9375
1667.03	75.275	77.4155	73.0655	91.6047	81.4459	78.0169
1670.21	74.3399	78.2307	69.7917	89.3201	86.7552	81.3318
1673.38	82.5633	85.8092	76.25	90.5037	87.5177	82.8729
1676.57	78.8229	82.0652	67.1726	83.0443	87.9695	77.9587
1679.76	78.1078	82.2464	74.6429	87.1456	84.6936	83.0474
1682.97	78.7954	78.4722	69.5536	83.0168	80.3728	74.1204
1686.16	73.5974	81.5519	72.2619	84.5032	84.9478	82.9311
1689.42	76.7052	80.0121	68.0655	79.6587	82.2367	80.1687
1692.63	74.3124	77.2041	70.4464	87.2282	88.4496	79.7325
1695.83	72.9923	76.2681	70.4167	84.5582	92.1209	78.7438
1699.02	72.7723	73.7621	71.1905	88.3567	86.614	76.563
1702.21	78.2728	79.8611	72.4107	91.1643	83.7899	86.6822
1705.41	71.4521	76.6908	77.8869	85.6592	81.4459	84.4722
1708.62	76.2376	81.8237	66.9643	86.7052	87.2917	86.5077
1711.84	74.89	74.3056	63.5119	87.2282	84.5806	77.0864
1715	74.2849	79.8309	68.8393	87.5585	91.0195	75.6615
1718.16	74.725	82.337	67.1131	85.8244	86.6987	80.9247
1721.35	79.4279	78.5326	72.9464	83.292	85.6538	78.9183
1724.56	71.5072	79.9215	70.1488	84.2279	87.9695	78.453
1727.76	79.7855	81.7935	64.256	84.9436	81.0788	81.2445
1730.96	73.6799	73.3394	71.5476	85.2739	83.0556	77.697
1734.13	78.3828	77.1437	74.2857	88.7696	83.2251	83.1346
1737.31	70.242	84.1787	70.2976	90.4211	86.5575	75.6034
1740.49	75.6051	76.3587	69.494	80.5945	82.7732	82.4658
1743.67	71.8372	76.0568	69.7321	92.1277	78.2547	81.5644
1746.83	73.8999	75.2717	73.869	81.3653	83.338	85.8971
1750	69.4719	81.7633	74.2262	89.0449	78.6501	83.9488
1753.19	76.8152	72.1014	70.8631	85.0537	83.338	77.4062
1756.38	78.3278	76.5097	66.3393	86.9254	87.2352	80.6048
1759.55	74.9725	72.3732	75.4762	85.1913	89.1556	83.6871
1762.72	78.9329	77.6872	74.7321	89.1825	81.5589	82.2332
1765.91	76.7327	75.9964	69.494	82.2186	85.1172	81.6516
1769.09	76.8152	77.9589	69.8214	81.3102	84.2417	84.1233
1772.29	77.6678	79.4384	68.8988	86.0996	84.4677	79.2382
1775.45	82.1782	77.8382	69.9702	86.6777	86.7552	77.9587
1778.63	75.9076	78.5024	68.4524	88.3292	90.2005	78.1041
1781.84	77.1177	81.5821	67.4405	89.0449	90.2852	75.3417
1785.04	77.2827	78.0495	76.8155	88.1916	82.5473	79.3545
1788.28	71.9747	80.7065	69.0476	86.2373	84.27	81.5063
1791.47	75.44	77.2645	70.7738	81.6405	89.9463	78.3949
1794.98	74.615	74.8188	67.2024	90.2835	86.8964	88.1361
1798.14	75.11	75.6944	75.1786	82.191	81.9543	80.5176

## Sheet: Figure 1-Fig sup 3-Panel C
	AB/AB-Cy5 0N0-Cy3 amp-pnp			AB/AB-Cy5 0N0-Cy3 atp
0	96.5527	80.8564	89.9359	87.9867	90.5702	88.8676
3.625	88.9794	90.6801	86.6257	84.01	86.1196	87.2361
6.788	85.1792	93.9826	87.3465	97.6363	89.4854	98.7844
9.981	89.9566	84.4388	86.3054	89.5717	96.5229	100
13.148	89.5494	88.0213	94.8745	88.5984	88.4562	84.485
16.327	90.1737	85.4184	90.4965	100	92.7121	86.2764
19.498	81.6504	100	93.3796	92.8254	91.516	91.2668
22.659	92.1824	91.0719	91.4576	85.5673	89.5132	90.1152
25.818	90.0109	88.8049	95.0347	97.7753	94.2976	90.7869
29.004	93.6754	86.7338	90.4164	89.8776	95.7163	88.7396
32.173	91.0966	86.1461	92.9525	92.7419	84.1168	88.1958
35.347	93.1325	80.4366	97.9712	94.188	100	90.2751
38.526	89.2508	86.398	94.7678	91.9355	92.7121	88.0998
41.703	89.3051	87.3496	89.5622	94.2158	90.3755	87.8439
44.874	91.5038	86.314	91.0838	86.04	92.1001	83.3973
48.04	96.2269	93.8707	92.3385	94.5773	83.1433	76.9674
51.214	94.4897	88.2172	87.6135	89.2659	98.8039	91.9706
54.386	98.317	92.5833	89.8025	91.6018	84.5341	93.73
57.547	85.1792	84.2989	90.4698	85.6507	89.7357	87.428
60.747	96.6884	88.8329	95.0614	90.4894	90.7928	93.9859
63.927	84.962	90.7081	93.4864	90.0445	87.6217	79.7185
67.094	86.9164	88.9729	89.1084	89.5717	87.9555	93.666
70.287	83.7948	88.4691	94.8211	87.8754	90.8484	92.3544
73.472	90.0109	90.5122	90.0961	91.0178	87.733	90.691
76.665	88.7351	94.0666	91.4309	88.4316	87.5661	83.2054
79.858	91.3409	90.7921	95.1949	85.2058	88.178	79.4626
83.025	90.5537	91.2399	88.3342	92.6585	91.4604	88.1638
86.193	94.1911	95.1301	90.9237	89.5717	94.7149	88.0678
89.359	83.6048	89.8964	94.4207	88.6819	84.6453	83.4613
92.53	87.1878	91.4917	93.3262	90.7397	89.7914	85.0288
95.726	91.4767	85.1665	93.166	95.9956	94.9652	79.4306
98.894	94.2182	86.286	94.7144	91.3237	90.765	86.0845
102.055	89.4137	84.5508	91.0838	93.4372	89.7357	80.6142
105.234	89.4408	93.3389	93.4063	86.5962	87.6495	89.2514
108.41	88.4365	92.1355	94.1004	92.1023	89.0125	84.261
111.586	99.1585	90.3442	89.1084	92.6585	89.3463	86.1484
114.772	95.114	89.7005	83.1554	89.0156	81.363	93.2821
117.938	89.0608	93.255	91.2974	91.4071	90.3755	88.1958
121.103	92.1281	92.1914	88.2541	89.4327	92.3505	85.3487
124.281	93.0782	86.1181	87.8804	83.5651	87.9555	82.6935
127.457	92.5353	83.6552	90.6567	92.3248	89.8192	82.7895
130.621	91.6124	91.6877	98.6919	87.1246	89.9305	85.9245
133.782	93.5125	87.3496	90.283	87.5973	90.0695	83.3013
136.953	92.1281	89.2527	91.7512	89.2937	89.7357	88.8996
140.123	86.5092	90.7081	90.016	82.4249	91.9889	86.0525
143.289	97.5299	87.5455	95.4618	85.5395	86.1474	89.5074
146.453	89.1151	86.286	84.2766	89.1546	80.9458	87.3001
149.619	93.241	83.3753	85.024	89.3215	94.2976	91.0429
152.791	94.0825	84.3549	87.2664	84.6496	93.8804	80.2943
155.967	93.2139	95.0742	89.8558	88.0145	84.6175	85.7326
159.132	90.7709	89.4486	95.1682	89.9611	88.79	88.1638
162.306	91.6667	89.5326	89.4554	84.3437	81.057	87.3001
165.473	88.7622	91.9116	87.0262	86.5128	89.7914	86.4683
168.651	88.8979	88.3291	89.3219	88.2925	88.7344	84.8049
171.818	91.2595	92.6672	93.1927	89.7108	85.2295	85.8605
174.984	88.9794	95.0182	85.7181	86.4016	87.121	87.8759
178.154	89.5223	88.2732	92.0448	87.4583	87.9555	82.4696
181.331	87.6221	91.4638	94.6877	89.5161	81.4465	81.222
184.501	88.8436	90.0644	90.9503	94.1046	94.8261	86.2764
187.667	92.3996	93.115	84.4634	90.1001	86.8985	83.1094
190.855	96.987	89.3927	96.6898	89.5996	83.0598	93.3781
194.024	89.468	93.283	93.5131	92.6029	88.5118	79.4626
197.189	93.1325	91.016	89.5088	88.0423	84.8679	87.9718
200.366	97.9642	90.932	96.6364	88.8487	82.3922	88.5797
203.525	94.0825	92.5553	91.9915	93.1034	86.7038	86.2124
206.699	86.5907	90.7921	87.6668	80.8676	85.6467	87.8119
209.865	94.0825	87.0137	90.5232	89.5161	84.1168	82.5656
213.027	90.9609	87.6574	93.8601	82.2024	85.6189	90.0512
216.189	88.8708	91.0719	100	85.9288	92.2392	89.1875
219.365	85.8035	89.6446	89.2686	89.5717	89.8748	84.1651
222.54	90.7709	87.0697	88.3609	85.7063	82.2253	87.3321
225.719	96.5527	87.8533	93.6733	84.7887	89.2907	81.158
228.911	86.1835	95.0462	99.1725	87.208	85.5355	77.9591
232.077	87.1878	88.1332	86.0384	89.238	84.4784	93.634
235.254	96.3355	90.1203	85.638	84.2603	88.6787	80.1663
238.452	89.468	88.1892	98.5051	80.5895	90.0974	80.9021
241.644	88.3008	87.0977	90.0427	88.1257	85.0348	81.5099
244.841	90.0923	92.4153	88.1474	88.4038	80.751	84.5489
248.014	91.911	86.8178	85.5846	90.1001	83.6439	86.2764
251.179	92.6167	88.553	86.3855	83.3982	84.3394	87.428
254.345	86.6721	97.0053	87.5334	86.485	88.3449	86.2764
257.509	90.5537	89.5046	99.8398	90.7397	86.2309	82.8535
260.707	95.3583	89.8964	95.6754	92.158	86.0083	85.6686
263.869	91.721	84.7747	93.4063	79.1713	85.4798	75.8477
267.062	92.7796	96.0537	86.9728	90.7953	85.5076	81.0301
270.228	95.3312	90.0924	89.7491	85.9288	87.7886	81.126
273.408	86.5364	86.8178	92.5254	85.5673	88.2893	83.5893
276.58	92.3724	89.0848	87.9338	89.4883	84.0056	78.4069
279.743	96.3355	91.1559	93.433	86.04	85.0904	82.0537
282.923	91.5038	86.9577	94.5008	80.7286	88.9013	87.9079
286.102	91.5309	84.9706	94.4207	83.5373	88.5118	85.9245
289.283	89.0337	87.0137	85.0774	81.7853	82.5869	86.9482
292.481	94.8154	99.3563	88.6546	83.9822	82.7816	80.5502
295.649	87.7579	89.4486	85.5312	86.4572	89.2072	87.3001
298.837	97.3941	85.8942	89.9893	88.8487	86.1474	87.0441
302.011	88.3008	94.4025	93.433	85.1502	80.5841	79.7505
305.184	83.1162	83.7112	95.7822	85.8454	90.9597	79.1747
308.355	97.7199	87.9933	93.7533	90.3782	89.3463	83.4933
311.548	91.7481	89.7845	84.5969	81.3682	84.9513	86.3404
314.723	89.1422	92.3314	91.5376	81.396	88.484	85.3487
317.895	90.4452	93.087	86.3855	87.2636	84.2003	84.7729
321.086	88.2736	86.5099	88.5211	89.3215	86.4534	82.9175
324.255	91.6667	91.2958	82.4346	84.8443	91.0431	82.7895
327.438	93.0239	86.0062	90.5499	86.1513	85.5911	89.0915
330.603	96.3626	88.553	90.977	80.4783	87.4548	80.5182
333.773	89.5494	91.6597	87.8537	83.2592	86.064	79.5585
336.941	89.6851	92.6392	87.3732	91.8242	89.1794	81.6699
340.132	91.911	90.7361	90.3097	88.3204	83.6439	83.6852
343.309	93.8111	97.2572	90.2296	84.594	77.7469	81.8618
346.481	97.1498	83.8791	86.9194	88.8487	88.6787	86.9162
349.656	90.3909	91.7716	97.4373	88.9878	88.2615	80.0064
352.868	87.0793	86.1741	92.7923	89.5996	77.4409	80.6462
356.057	94.164	91.6317	92.7389	84.5384	91.21	87.396
359.232	93.051	88.8609	91.1639	87.8198	87.4548	80.1024
362.393	89.5494	92.9751	92.6855	87.5139	81.9193	83.1094
365.561	95.6298	94.5704	93.2194	82.5362	85.9249	77.4152
368.731	89.8751	89.7565	89.0016	82.3415	84.8957	82.6296
371.913	88.3279	88.3291	90.1228	80.4783	87.4548	88.1318
375.098	86.3735	92.9751	87.9071	85.7898	81.975	87.0122
378.26	88.8165	99.944	91.1906	87.7364	78.7761	84.517
381.429	94.164	91.6597	83.9028	81.1457	83.9777	84.6449
384.599	88.1922	90.5961	91.8847	85.317	82.0306	82.9495
387.763	88.8708	85.9782	87.6935	89.5161	80.3338	85.5726
390.938	90.1737	83.991	96.5296	83.2314	85.2295	81.5419
394.101	91.9924	90.848	84.3833	76.0567	89.0125	82.1817
397.266	92.5081	86.7898	95.1415	84.2325	83.5883	80.6142
400.462	90.8523	84.9706	82.7282	83.3148	88.8456	78.3749
403.627	93.3768	83.7951	93.5665	81.0345	85.6467	79.9104
406.787	88.4365	89.1408	94.661	84.8999	85.7858	88.1958
409.972	94.354	88.3571	94.7411	82.2024	83.338	81.0621
413.135	91.0695	86.1461	92.0982	82.9533	81.8081	84.485
416.307	91.8567	87.5175	93.1127	80.2002	90.8484	83.4613
419.473	95.1412	90.0924	83.7427	80.8398	76.7455	80.6142
422.654	88.4636	89.1128	98.2381	81.7297	85.6745	85.6366
425.835	92.8339	89.8964	93.6999	87.0968	76.1335	87.0122
429.001	90.6352	88.3571	87.5067	87.208	82.42	83.5253
432.179	88.6536	85.9502	90.4965	81.3404	79.7775	81.4779
435.357	95.1954	93.8707	88.2007	86.5684	90.4033	76.8714
438.538	92.481	85.6143	95.1949	83.2314	86.3978	80.0064
441.734	88.0565	88.8609	94.4741	85.2058	86.7872	77.2873
444.924	89.9837	86.6499	91.9114	83.4816	83.0598	80.0704
448.096	85.6678	82.7036	92.6855	80.3393	82.42	86.4363
451.266	87.3779	90.4562	92.3919	77.8643	84.4506	83.9091
454.449	94.7883	90.1763	84.5435	82.3693	80.9179	81.158
457.61	89.1965	87.5735	91.0571	81.7575	84.1446	84.1651
460.772	95.684	91.1279	97.1436	82.2581	82.9207	85.9565
463.955	93.5668	89.7285	89.2686	86.4572	79.7497	79.4946
467.124	88.7351	88.1612	92.3919	89.5161	82.6982	82.3097
470.293	89.4408	87.3216	91.7779	82.2024	83.0876	80.4862
473.464	92.6167	86.1181	96.1559	83.2036	75.7163	87.6839
476.637	91.3409	86.1741	88.9749	79.0044	83.4492	76.3916
479.825	93.6211	83.5992	85.8516	82.4249	79.9444	80.8381
482.988	80.6189	85.7263	86.9995	84.1769	91.7385	75.08
486.161	90.1737	86.6499	90.977	74.8331	84.7566	81.7978
489.345	89.2508	89.2807	90.7902	80.6174	81.2517	75.016
492.506	84.8534	87.1537	88.708	79.7275	86.5647	83.1414
495.685	100	94.1226	88.9215	85.1502	89.1238	75.4958
498.863	94.8969	90.7081	89.5088	84.4828	76.6898	82.1817
502.035	88.6536	94.4305	90.3897	84.5106	87.5104	80.5502
505.214	92.5353	89.4207	90.3897	78.8376	83.0876	81.6699
508.415	91.7752	87.4615	81.7672	85.4283	85.0904	81.7019
511.597	86.1564	84.3549	84.9706	87.5417	80.8901	89.0915
514.783	86.5907	82.3957	86.4656	79.4494	83.0598	78.5029
517.953	94.8154	82.7876	95.4351	81.535	83.1433	81.382
521.116	91.7752	93.7308	91.3241	77.9477	83.1989	78.7588
524.303	94.0011	89.7845	88.8414	79.6997	78.025	80.0064
527.473	94.3268	91.6877	82.3278	84.4549	83.9499	84.1971
530.645	94.9511	87.3216	85.8783	81.8687	88.5675	76.6475
533.819	92.7796	85.4744	92.3652	81.5907	79.249	76.9674
537.009	87.6493	88.749	97.4907	84.9277	77.1627	80.5822
540.185	87.6493	86.37	92.9258	77.0578	86.9541	79.2386
543.353	90.8252	88.9169	94.7678	76.4739	80.5285	78.183
546.517	89.3051	89.2527	88.7347	83.2036	79.249	82.2457
549.687	88.9251	85.9782	91.2707	77.8087	80.6398	79.4946
552.853	95.1954	82.3678	86.9995	80.673	76.6342	83.5573
556.04	86.7535	88.525	86.2253	82.6752	82.5591	80.8061
559.23	86.4278	87.4615	89.2419	72.9978	79.9166	83.3653
562.394	99.7828	89.7005	91.3508	83.7597	87.0097	84.1651
565.575	95.7383	81.6401	87.7202	88.3204	81.363	73.1606
568.745	93.5125	88.9729	94.1004	78.921	82.6704	81.5739
571.916	90.5266	85.6703	86.9728	80.5617	82.8929	73.8964
575.088	93.241	90.7081	88.9749	80.9511	87.121	85.3807
578.266	88.1107	90.1483	86.7058	75.6118	81.4743	76.9034
581.444	85.152	85.4184	90.5232	85.5395	81.0848	83.5253
584.616	92.4267	89.1408	90.4431	77.1969	79.694	77.9271
587.779	85.532	87.9653	87.2664	77.6974	79.6662	75.4958
590.971	96.3898	92.7232	89.2952	77.0578	81.5299	78.8228
594.133	88.7351	89.6446	88.0406	82.1746	77.0793	74.7601
597.292	91.7752	84.9426	83.6893	77.4194	79.5271	81.7658
600.472	87.3507	88.8049	81.6604	80.9511	80.3338	80.6142
603.649	92.7253	88.1892	87.6401	83.7597	79.3324	76.1356
606.82	85.5049	85.8382	92.9525	76.1958	73.2128	78.023
609.981	85.9121	83.9071	88.9482	81.3126	80.751	79.4626
613.159	85.2063	88.525	97.7843	78.6707	79.2211	77.4792
616.321	90.3366	83.9071	89.1351	81.396	86.815	78.8548
619.493	90.2552	86.8458	85.1575	79.8665	82.5869	77.5752
622.663	90.1466	90.1203	91.0571	78.8932	80.0278	86.5323
625.829	94.8154	89.5606	91.4042	82.119	76.5508	78.7268
628.992	97.5299	83.1794	83.4223	80.8676	79.6106	80.6142
632.161	90.0651	89.6725	89.6957	81.1179	78.025	78.6948
635.332	86.2649	84.6348	89.5622	69.327	78.8873	79.3026
638.498	85.2334	90.4562	94.4741	85.3448	81.363	75.7518
641.662	87.3236	83.0675	85.5579	74.8888	82.4478	82.8855
644.853	90.4723	89.8685	89.8025	79.1713	84.4784	83.0774
648.022	88.8979	90.82	91.3508	78.6707	85.0348	75.08
651.192	91.6395	85.2225	88.3609	88.4316	78.1363	80.1663
654.358	84.7991	91.7156	91.858	76.1123	76.1613	74.5361
657.535	92.0467	84.075	89.9359	82.0356	78.8317	83.7492
660.689	94.5711	82.5637	89.3219	80.0334	77.1071	72.7447
663.877	92.8339	85.6423	93.6999	79.7275	83.3658	75.9437
667.041	91.5038	94.3465	88.094	83.8988	80.1113	80.9341
670.252	87.6493	87.0417	85.6914	80.7286	82.2531	83.5253
673.415	89.9294	91.7716	86.6257	77.0857	83.5049	75.016
676.599	86.835	84.131	85.0774	75.4171	82.3366	79.7825
679.787	92.7253	85.8942	88.0673	85.2614	80.9179	74.8241
682.961	86.8893	83.2074	94.5275	77.3915	77.1071	79.2706
686.137	92.8067	83.8791	86.3588	86.5406	73.1293	76.1996
689.315	86.0206	84.4668	85.6647	71.3571	81.363	74.952
692.489	86.3192	87.2936	90.283	77.8087	82.7816	74.1203
695.661	84.9077	86.258	86.2787	83.6763	84.0612	87.524
698.847	89.2237	91.0439	89.9359	76.3904	78.4701	78.3749
702.016	90.0651	83.0954	83.716	78.059	89.4854	83.4293
705.179	93.0239	91.1839	91.6177	81.2848	80.8901	75.2399
708.343	91.911	88.8049	89.3486	74.7775	80.2782	78.151
711.518	93.1868	88.3571	87.3198	80.228	77.8581	76.9994
714.713	90.038	92.4153	90.897	77.475	77.8303	82.7255
717.874	86.1835	87.6854	85.5846	80.7286	72.0445	78.3109
721.058	88.5451	84.7747	91.6177	73.0534	80.2225	82.5976
724.256	87.7036	93.9267	85.1041	83.2314	76.662	76.0397
727.416	92.0467	83.5153	86.8393	76.4739	81.3908	78.183
730.621	90.418	91.6597	84.2766	77.2247	80.1669	78.6308
733.817	91.2052	84.4668	90.4965	77.5306	74.4089	78.4709
736.977	94.5711	80.3526	82.8083	80.3393	78.5535	82.0857
740.142	85.8035	89.9804	84.063	77.5862	70.0974	76.9994
743.317	90.4452	88.0772	89.1885	84.01	84.7288	82.6615
746.513	91.0695	83.4593	91.244	80.9232	77.3296	79.4306
749.687	86.2921	91.0439	89.2686	79.8109	82.9764	86.4683
752.865	91.5309	81.3882	93.3796	75.9177	79.0264	76.1036
756.034	86.5364	83.4313	86.3054	80.3393	77.274	74.7921
759.208	89.3051	86.6499	92.472	71.5239	79.0264	75.6558
762.401	92.5353	86.258	89.055	82.0356	75.6885	75.8477
765.579	90.2009	91.7716	84.5702	78.7264	78.8873	73.1606
768.751	90.3366	89.9524	86.4389	79.9778	77.8581	77.7991
771.918	84.962	85.6423	82.8617	78.4761	80.2782	73.3205
775.088	93.8925	83.4593	89.6156	77.3081	73.6022	72.5528
778.257	82.4376	85.5584	83.2088	74.8888	70.8206	73.3525
781.434	84.2834	87.3776	84.41	80.6452	82.726	75.4319
784.615	88.2193	86.37	84.8372	77.5862	78.3032	74.2482
787.795	87.5679	85.4184	88.1741	81.8966	82.6704	74.0243
790.966	93.4311	93.5908	93.78	77.9199	80.612	69.9936
794.139	90.1737	82.1159	90.5232	72.2191	79.8331	73.8964
797.308	86.3464	83.4313	82.3278	75.4171	73.1572	77.5432
800.478	85.6135	95.7179	95.4618	82.8977	83.2267	78.6948
803.656	88.5179	82.8995	91.1906	80.8676	76.2726	81.35
806.818	90.038	83.4873	92.1516	81.7853	79.0542	81.6699
809.989	87.6221	85.6423	83.2888	72.9422	74.8261	78.8868
813.155	85.0163	90.4842	88.1207	74.277	77.6634	76.1356
816.318	90.3366	84.103	88.5745	79.366	72.4618	75.4958
819.494	89.2508	86.0062	89.4287	75.8065	75.9666	74.6321
822.659	83.7948	91.3238	89.0283	77.3359	80.6954	82.1497
825.825	89.7394	86.8738	91.0571	80.3949	83.1989	75.3679
828.999	81.0261	89.6446	83.9829	74.6941	77.6912	82.0218
832.172	89.5765	80.7445	90.7635	80.8954	79.3324	79.7825
835.335	91.9653	86.0341	90.2029	78.8654	81.5299	73.0006
838.507	90.5809	85.0546	88.0673	80.0334	80.1391	84.421
841.667	88.7079	81.836	86.2787	73.693	77.886	77.7351
844.882	84.1205	88.0772	88.3609	72.5528	69.0125	71.4012
848.051	91.7752	79.9328	92.819	78.059	80.0278	75.2399
851.232	83.7676	87.5455	84.7838	76.9744	74.8261	75.9117
854.414	92.1281	85.7263	89.7758	76.9466	77.4965	76.1996
857.606	86.9978	93.7308	92.6588	74.5273	83.2267	74.0563
860.762	91.3138	89.5046	85.5579	76.2792	76.5229	74.4082
863.952	90.1737	90.932	83.9028	73.6652	78.6648	78.5669
867.118	83.5505	92.4153	90.7902	79.1713	79.4715	73.7684
870.299	92.3181	86.9018	92.0448	78.0311	77.3574	76.9354
873.465	82.0033	86.5659	93.9936	75.1669	78.8595	78.215
876.635	88.1379	87.1537	87.8537	79.5328	75.9944	77.991
879.808	84.8534	85.3345	84.6503	73.2481	71.7107	73.8964
883.007	95.3855	89.7285	89.5622	75.8343	79.6106	73.3205
886.165	93.2139	89.2247	88.5211	74.4438	78.0529	73.6084
889.348	85.532	85.3345	92.9258	75.3059	75.7163	80.6782
892.502	84.5548	84.5228	88.3609	82.7864	73.7413	73.8324
895.682	85.6135	83.3193	86.3321	73.3037	77.1627	78.3429
898.845	88.2465	87.2096	88.8681	79.5328	71.9054	69.3538
902.014	86.1564	93.5628	80.1388	72.97	81.3352	69.9936
905.175	84.2834	87.4335	89.0016	86.9855	74.1029	78.279
908.343	86.5364	82.3398	90.5232	77.475	77.7191	74.5042
911.501	82.0304	88.8889	82.9685	73.5261	70.6815	81.9898
914.661	94.3811	85.4744	92.0982	81.5072	72.8234	70.0576
917.832	83.4962	85.0266	95.275	73.0534	77.5522	80.0064
921.014	88.4365	90.5402	89.9626	72.3582	73.0181	75.3039
924.189	85.5049	86.37	95.8356	74.9722	75.3825	66.5067
927.368	84.8263	97.5931	86.1185	74.8053	73.1015	73.8324
930.548	89.0065	86.342	86.7058	72.97	70.904	72.8727
933.723	85.9935	85.5304	86.7058	78.4483	75.5216	65.3871
936.888	86.0749	86.314	86.0117	75.4171	78.5257	73.0646
940.073	89.3594	82.9275	90.1495	80.3949	72.4061	79.4306
943.242	88.0836	81.9479	86.4656	84.4549	78.1919	68.1062
946.42	86.4007	76.5183	89.2952	76.8632	71.1822	83.8452
949.582	86.0206	78.4215	87.7202	78.0033	72.5452	65.8029
952.745	83.6048	84.2709	88.9215	70.7175	77.6912	78.4069
955.92	85.9392	89.2247	85.5312	73.4427	72.6565	70.7933
959.097	94.8969	86.426	86.9995	76.4182	74.5758	78.9507
962.272	78.203	82.0879	83.9562	74.1657	72.3227	73.1606
965.459	89.4408	82.9835	91.0571	80.3671	74.0473	72.3289
968.627	85.8578	85.3904	84.5702	80.5617	78.2476	75.3999
971.823	84.8806	77.9737	88.2808	74.4438	78.1085	71.4971
975.001	85.9121	88.553	86.4122	76.9744	74.1307	67.7863
978.186	89.6851	83.5432	89.8825	81.2013	82.6982	74.888
981.382	94.9511	87.8533	89.6423	78.9766	79.1655	70.0256
984.549	88.5722	85.3904	82.9952	78.8654	82.9207	81.7019
987.737	92.291	85.2785	92.5521	75.9733	77.6634	82.1177
990.934	86.9978	85.9222	90.0427	76.8354	77.0515	74.3122
994.11	86.2649	88.2452	89.1618	79.5606	77.58	69.6097
997.289	90.9881	81.9759	90.4164	72.9143	76.7177	77.7671
1000.47	90.8795	86.9577	86.3054	73.8598	74.7427	70.8253
1003.66	85.8035	83.5712	89.4287	75.0556	77.7469	75.112
1006.84	86.9978	79.0652	86.3588	78.3092	78.637	72.9047
1010.01	90.8252	84.6907	92.3118	77.5306	80.306	66.1868
1013.19	91.1781	87.7974	87.8804	73.1646	71.1266	84.1331
1016.39	88.9251	82.7036	85.4778	71.802	71.9332	71.913
1019.58	87.8664	85.0826	84.5702	77.03	81.1683	73.6404
1022.74	88.0022	86.37	90.897	74.3604	70.2086	70.6014
1025.91	89.8208	86.7898	79.1778	75.3893	74.9652	65.707
1029.06	82.8176	80.2127	89.0016	76.5851	75.2712	71.2092
1032.24	83.2248	86.426	87.0796	72.1913	74.4089	74.0243
1035.4	84.5277	81.3602	89.7491	69.9666	77.1071	70.9853
1038.6	86.4007	85.3345	88.4944	76.168	76.1892	66.5707
1041.78	83.4148	87.8533	91.6444	71.1624	72.6008	76.9994
1044.96	91.2866	82.8995	89.4287	71.3849	73.185	77.2233
1048.12	84.962	87.1257	87.3465	74.3048	74.0195	76.3596
1051.29	87.1607	87.6574	88.5478	69.8554	74.1586	73.6084
1054.49	83.8219	85.2505	82.8617	68.0756	75.7997	67.8503
1057.67	84.6091	84.159	92.0715	78.1702	79.0542	72.1049
1060.87	90.2552	85.5863	89.5088	72.8587	68.8734	72.2969
1064.04	82.6819	78.7294	87.48	76.2514	72.9624	74.6641
1067.23	91.0423	80.9964	83.1554	77.2803	76.4395	74.2802
1070.4	86.5092	86.7338	84.8905	72.9978	74.7427	78.3109
1073.6	87.8936	87.7134	90.7635	72.7475	74.1586	79.8145
1076.77	82.139	84.2149	88.3609	74.0267	76.8846	70.7614
1079.95	86.8621	93.143	90.0427	71.9132	68.6231	81.19
1083.15	79.7774	85.6703	85.024	71.1902	69.9026	73.4485
1086.33	88.5993	82.2278	87.4266	71.9132	74.242	71.913
1089.52	87.6764	88.749	92.9792	74.1657	73.4075	71.5931
1092.68	90.7709	89.4766	85.1308	78.059	77.3574	69.2258
1095.87	87.8664	84.2709	89.5889	76.7798	76.2726	73.0966
1099.03	84.4734	82.7036	86.0918	74.8053	72.267	76.6475
1102.23	80.4289	84.047	93.7533	73.109	80.9179	72.2329
1105.41	88.6808	83.2074	90.1762	68.6874	72.7677	76.3276
1108.61	87.8664	80.1567	88.708	75	68.178	68.5221
1111.82	85.0977	87.2656	90.4431	71.8854	71.5438	72.6168
1114.98	80.1846	88.693	86.7859	73.9433	72.8512	79.0467
1118.14	88.0565	81.0243	89.1618	81.257	73.9082	78.4709
1121.32	86.5092	84.7747	89.9893	81.0901	74.3255	75.144
1124.48	81.2704	86.0901	89.0016	74.416	77.3296	71.3692
1127.65	83.9577	88.9729	88.6279	75.1669	75.2434	65.8349
1130.85	85.4235	80.2967	91.4042	72.4416	74.5758	70.7933
1134.03	85.4506	74.923	85.5579	68.3815	75.0487	72.7767
1137.21	85.2334	84.5508	86.3855	69.9388	81.0848	69.8017
1140.37	83.9577	78.7294	89.669	69.7442	79.1099	73.1926
1143.54	88.4365	90.3442	88.8681	76.2514	68.8456	72.4888
1146.71	89.3865	82.4517	83.449	71.218	74.7149	67.0186
1149.89	82.8447	83.4593	84.6236	70.356	80.4172	66.2188
1153.07	88.4093	82.6196	87.6135	70.8287	70.9318	78.055
1156.27	87.8664	89.4486	84.5969	78.4483	73.936	66.5387
1159.43	81.3518	84.8027	88.2007	70.8009	76.8289	68.874
1162.6	86.2649	83.7671	86.9461	75.3893	72.573	71.2732
1165.77	88.165	90.3442	87.7202	69.9388	71.4325	71.849
1168.98	96.0912	84.187	84.7571	76.4461	74.0473	74.6641
1172.14	86.0206	82.4237	85.8249	73.8877	76.8846	74.0883
1175.32	85.5049	82.2558	86.1986	68.7987	75.7719	67.0505
1178.54	86.3464	82.7596	86.9995	73.7486	74.3811	69.4178
1181.71	84.9077	84.4668	87.3198	77.8643	71.1544	68.5861
1184.87	90.418	86.398	93.4597	78.7264	70.9597	64.6513
1188.05	81.4332	85.2225	81.4736	76.7798	80.0834	67.7863
1191.22	83.8219	80.7445	88.3342	71.4961	72.9346	74.6321
1194.42	85.532	88.693	86.0651	75.6952	69.0125	69.9616
1197.59	84.0119	82.7036	95.8623	78.9766	71.7107	67.0186
1200.77	79.8046	82.5637	85.3444	68.5484	74.1307	76.6475
1203.93	90.3094	81.0243	85.2643	67.5195	74.1864	69.1939
1207.13	80.8903	89.2247	86.4656	67.1301	75.0487	72.1049
1210.3	85.3963	88.4131	92.6321	73.4149	76.2726	75.6878
1213.48	84.5548	88.525	85.1575	76.9466	75.4103	72.3289
1216.64	85.0977	80.4926	84.7037	67.5195	69.4576	73.5125
1219.81	86.1564	86.7058	84.1431	69.0768	72.5452	68.9699
1222.98	87.6493	78.7853	83.6626	80.228	72.2114	68.65
1226.16	88.9522	81.4442	87.3465	66.3515	74.3255	73.3205
1229.32	82.8176	91.4638	89.2686	67.8532	69.8748	68.0422
1232.51	83.2248	83.6552	86.252	69.0768	70.2643	69.8656
1235.66	87.7579	85.6703	87.9338	74.8888	75.4381	73.6404
1238.85	83.1433	82.6196	87.2397	69.1602	68.8178	70.6654
1242.02	86.6992	79.2331	89.9092	70.495	73.3519	69.0659
1245.19	90.1466	90.4282	87.48	74.0267	67.2879	72.8407
1248.35	84.4463	85.6703	85.9584	75.7508	71.9889	67.9782
1251.51	82.899	89.6446	79.2579	72.4416	73.2684	70.8893
1254.71	88.9251	85.0266	93.2461	67.5751	69.8192	77.0953
1257.89	90.3366	85.0826	80.8062	67.5195	69.4576	69.0659
1261.05	84.6906	80.2687	91.1906	68.9655	73.7135	74.4402
1264.24	89.5223	84.103	88.441	72.6085	72.3783	69.0019
1267.41	90.4723	82.5637	88.9749	70.0501	71.9611	67.9782
1270.6	86.4278	83.9351	88.3075	72.0523	75.3268	68.1702
1273.79	83.2248	82.8435	79.7918	73.5261	70.7371	67.5944
1276.95	84.582	86.7058	84.2232	63.0145	70.6259	69.0979
1280.13	85.152	84.7187	88.4677	72.2469	71.2378	71.6891
1283.3	91.4767	76.8262	81.6871	72.6363	73.1572	67.5944
1286.48	88.2193	84.3549	82.7015	75.8899	73.2684	68.682
1289.69	82.0304	80.0448	88.7347	72.2747	72.8234	70.4415
1292.87	83.9848	85.2225	84.7037	72.9422	71.7385	67.4984
1296.06	84.3377	86.9577	88.094	73.8042	70.5702	72.1369
1299.23	84.4191	80.8844	87.3198	70.4394	73.8248	71.1772
1302.42	87.1064	80.7445	89.9359	69.7442	71.6829	74.2802
1305.61	85.1249	79.6809	85.5312	71.941	70.4312	70.3455
1308.81	91.4767	77.4139	94.2605	71.7186	67.733	72.8087
1312.02	86.2106	78.3935	85.6914	74.7219	73.7691	72.5528
1315.19	95.6569	79.0652	81.7405	74.416	74.1586	65.675
1318.4	80.4017	92.1355	90.7101	73.7208	71.5994	72.5848
1321.57	88.355	87.1816	82.7282	67.436	75.1878	68.5221
1324.78	90.8252	84.2149	84.2499	77.2247	66.509	66.0269
1327.94	92.101	90.1483	81.5537	69.7998	74.0195	73.7044
1331.11	89.2237	81.5001	81.3935	68.6874	70.3477	65.547
1334.29	79.8588	78.1136	82.0342	69.2992	71.0431	75.5278
1337.47	81.9761	83.6272	84.677	69.9388	72.4618	70.9853
1340.64	90.228	82.4517	80.4058	69.4105	80.8901	76.1036
1343.82	78.5831	86.1461	84.1164	69.9944	68.8456	68.3941
1346.99	86.2106	88.1612	84.2766	71.2458	66.8428	70.0896
1350.24	96.1726	79.2051	91.0571	75	71.21	73.0966
1353.4	82.3833	88.2172	83.2888	66.4349	70.1252	68.5861
1356.6	85.3149	86.7898	86.6524	69.2714	76.7733	69.3218
1359.78	81.7318	83.4313	87.3999	72.8309	73.3519	74.7281
1362.96	81.8404	83.9071	84.4634	67.297	69.541	70.9213
1366.13	79.0988	80.7165	84.7571	71.5239	68.9569	67.4024
1369.31	86.9435	83.9351	84.1431	65.1835	71.7385	67.8823
1372.49	79.8046	86.0621	83.3956	74.6107	71.516	68.1702
1375.71	83.4691	80.2127	88.094	74.3326	72.7399	62.476
1378.88	82.2204	79.541	84.5168	74.5829	70.0417	73.6724
1382.09	89.6851	90.3442	90.7635	71.2458	76.3561	66.9226
1385.27	84.582	82.7316	87.7202	70.356	71.3769	76.3276
1388.44	84.7991	79.513	88.708	69.772	72.9903	67.6264
1391.62	85.532	79.1492	87.6401	72.9422	68.6509	73.1606
1394.79	81.5689	81.6961	87.9338	68.4928	68.2893	67.7223
1397.96	82.4919	85.3624	86.519	73.1924	71.5716	67.4024
1401.14	87.2693	85.3904	88.6012	77.2247	68.5396	61.1004
1404.32	91.5852	90.904	77.496	71.5517	71.8776	71.817
1407.5	86.8078	85.1106	84.8905	75.6118	70.5981	68.1062
1410.77	81.9218	77.8617	79.7651	77.475	71.7942	62.8279
1414	87.0793	81.752	92.0715	68.9933	71.8776	66.1548
1417.16	82.2747	83.5992	84.6503	69.5773	74.3255	62.1561
1420.34	89.1422	76.6023	84.0096	66.1012	69.847	71.977
1423.51	84.4191	87.3496	89.669	68.5762	72.7121	67.4984
1426.67	85.4506	85.3624	81.9541	72.8031	77.274	64.7473
1429.85	85.2877	79.457	90.0694	66.1012	70.8484	69.0659
1433.06	84.6363	86.7898	78.6706	68.2981	70.4033	71.3692
1436.25	89.9837	81.4722	87.3732	77.0857	65.6467	69.6417
1439.42	83.7676	79.569	79.7384	70.5228	71.6551	68.682
1442.6	85.7492	78.7573	80.5125	71.7742	69.2907	76.2956
1445.76	87.1336	83.9351	81.8206	67.8532	65.0348	64.8113
1448.94	85.2334	83.3473	88.1474	65.0167	68.2058	69.3858
1452.12	86.0478	87.0977	88.8147	69.2992	74.4924	64.1395
1455.29	84.4463	89.2807	90.016	73.2481	69.0403	70.9533
1458.45	85.5863	78.1416	84.3833	69.3826	76.0501	67.9782
1461.62	82.4919	80.6885	90.977	74.1101	72.0723	72.1369
1464.79	84.5548	82.5917	86.9995	67.7697	70.0139	69.1619
1467.96	88.4365	83.5992	86.6791	70.7175	74.1029	69.6097
1471.14	87.3779	80.9964	89.7491	74.7219	70.1808	76.7115
1474.32	89.0879	85.1106	85.7982	69.5217	73.2406	67.7863
1477.5	78.4473	82.0039	89.8292	71.2736	68.5396	63.2118
1480.68	85.6406	89.4207	85.0507	71.3849	61.6968	72.9687
1483.88	80.8903	81.3042	85.3711	72.386	60.6398	70.3135
1487.06	81.3789	87.6574	83.4757	61.4572	71.3213	65.9309
1490.23	81.1618	84.6068	87.1062	67.436	72.8234	62.38
1493.42	90.0651	84.2989	86.4656	70.0501	70.0974	66.3468
1496.58	83.5505	79.9888	85.9584	69.4383	67.4548	64.5234
1499.76	83.2248	82.2558	85.5045	73.5539	69.9026	66.9866
1502.92	82.5461	85.1385	88.9749	67.2692	68.4562	69.0659
1506.12	76.0043	85.8382	84.4901	69.4939	69.2629	67.5944
1509.31	82.899	78.3655	80.8329	68.6318	67.733	66.1868
1512.47	84.2562	75.3149	90.9503	71.2736	71.6273	63.1158
1515.64	88.3822	81.752	78.0833	68.9099	70.6537	63.8836
1518.81	88.8979	80.6605	79.0443	67.5473	69.4854	66.7306
1521.97	87.9479	84.7747	81.9808	72.0523	65.6745	65.515
1525.13	86.2378	81.3602	93.6199	70.0779	70.1808	67.7543
1528.3	88.9522	78.8693	83.716	69.4105	65.8693	68.2662
1531.49	87.4864	81.5561	87.9872	64.7942	70.153	66.5387
1534.66	86.4549	86.0062	84.5969	71.5239	72.7399	66.6667
1537.84	82.4647	80.7725	91.0037	74.0545	69.6523	69.7377
1541.05	87.4321	80.8844	91.6978	70.2169	70.7371	60.4607
1544.23	81.6504	86.0621	83.1821	70.2169	67.8999	64.7473
1547.41	87.5679	82.7596	92.0182	72.3582	68.6231	66.9546
1550.62	83.3605	86.9018	89.2686	67.436	70.6537	71.4971
1553.79	86.1835	84.3549	79.6316	71.079	67.8442	68.5861
1556.95	91.5309	85.5304	87.8003	66.129	63.4771	65.3551
1560.15	81.5689	79.9328	83.716	67.4638	71.4047	62.8919
1563.33	78.5016	76.9102	83.2355	70.7175	75.4103	63.1158
1566.5	82.6276	77.6938	87.5601	62.9032	69.4298	67.4344
1569.73	81.1618	82.8156	88.1207	68.9655	77.0515	70.4095
1572.9	92.7524	83.7112	84.2232	66.9355	69.5132	62.476
1576.06	82.3833	81.2203	80.9397	71.1346	69.7079	68.3941
1579.24	87.405	92.7512	80.3791	74.7775	67.5382	67.1145
1582.42	81.8404	84.4388	82.8884	70.2725	70.904	67.9143
1585.61	87.2421	86.286	87.9338	68.7152	69.9026	66.6347
1588.77	80.5646	82.0319	81.7405	67.9644	67.2601	68.2342
1591.92	81.0803	82.0039	81.874	67.7697	67.3435	64.2674
1595.09	83.5233	81.0803	86.9461	68.1313	72.7955	66.3788
1598.28	84.1477	81.0523	87.9071	69.8554	73.7135	57.0377
1601.45	82.2204	81.2483	79.8452	63.96	67.5939	71.817
1604.64	80.1846	83.8511	88.7347	67.4082	64.9791	63.3077
1607.82	82.4647	76.9102	85.9851	71.9132	62.5869	68.1702
1610.99	83.4148	82.5637	85.1842	63.96	67.2045	68.0742
1614.16	85.9121	78.2816	80.4058	71.218	70.3755	67.4664
1617.36	86.9164	77.9457	87.5067	67.1858	64.6453	60.7486
1620.54	78.3931	76.8262	86.8393	67.2136	66.9541	68.5861
1623.7	88.4365	78.8973	86.1452	70.4116	67.121	66.3468
1626.87	96.2812	80.1287	89.8292	67.5751	66.815	64.5553
1630.06	87.7036	80.9964	81.5804	71.3849	64.5619	60.7806
1633.21	83.7676	83.6272	86.9194	70.3003	67.3992	68.5541
1636.4	87.595	80.7725	87.9338	68.3537	70.5981	63.6916
1639.66	83.6319	76.4903	81.1265	67.297	69.4019	66.6987
1642.84	83.9577	77.4419	87.8537	65.8788	65.0904	71.1772
1646.01	86.2106	79.541	89.9092	67.0189	67.6773	70.2815
1649.19	86.0478	79.569	85.5312	67.3526	69.5688	65.9629
1652.37	88.3008	82.0039	81.874	76.2514	74.0195	67.4664
1655.53	86.3464	87.3496	83.6359	68.4093	68.9569	66.8266
1658.7	86.2106	83.991	90.283	70.1613	70.7928	67.4664
1661.9	87.1336	78.0297	83.6893	69.5773	70.904	63.3397
1665.07	87.025	76.4903	87.9605	66.9077	72.4339	63.5637
1668.27	83.4148	81.3602	86.6524	69.1324	70.8484	67.8503
1671.45	85.2334	80.9684	88.2541	61.8465	67.4548	63.1158
1674.64	85.7763	78.3375	82.2744	69.5495	63.7274	64.9392
1677.81	88.7351	78.6454	87.2397	69.2992	63.9221	66.2828
1680.99	86.9978	82.0039	87.0796	64.099	69.5967	69.4178
1684.18	81.5961	80.9964	80.9397	68.604	67.7608	67.7863
1687.37	81.5147	83.5432	85.2376	73.4705	62.9485	64.8433
1690.55	85.1792	85.3065	81.7672	67.2136	68.2893	62.6999
1693.73	84.392	76.7702	85.8516	69.7998	68.79	70.5694
1696.93	80.9175	78.1696	77.6295	62.2914	64.9235	62.7959
1700.09	84.9349	80.8844	93.166	69.5773	65.2573	64.8113
1703.31	87.2964	82.9555	80.8062	70.495	67.1488	64.5873
1706.49	90.6895	83.1234	84.5168	69.4661	70.0139	70.3455
1709.66	83.8762	82.3118	85.4511	67.2136	68.178	61.0685
1712.82	85.722	79.597	82.4079	75.3893	70.5981	65.2591
1715.99	84.8534	85.4744	83.796	66.0734	76.8289	60.2367
1719.18	78.2845	79.4291	84.1164	67.5473	69.7636	61.9962
1722.38	84.5548	81.92	86.3588	69.3548	68.0389	63.7876
1725.55	85.342	75.8746	83.3956	67.436	67.8442	61.7402
1728.74	84.7177	75.9026	81.0198	67.5195	69.2907	62.1241
1731.92	83.0619	82.5637	83.5825	65.3226	70.4033	68.3301
1735.13	84.3105	80.1567	80.7528	77.2525	67.2879	67.5304
1738.31	85.8849	78.7573	85.3711	63.376	65.0348	70.6334
1741.48	83.1976	78.6454	82.9685	65.8231	73.6579	69.7057
1744.65	79.9403	78.1696	85.9584	64.2102	73.9917	66.5067
1747.83	88.4365	78.7294	86.1986	64.6274	70.2086	65.0992
1751.01	78.2845	87.7974	86.6791	65.2948	73.4631	63.1158
1754.18	78.203	79.9888	82.7549	66.6574	68.5118	64.1715
1757.35	81.1618	89.6166	83.6092	64.1546	72.0445	59.5969
1760.55	84.6634	86.8458	80.8329	69.0211	63.6439	69.2898
1763.73	81.3246	83.1234	81.7672	64.822	71.2935	71.4012
1766.9	78.0402	80.5206	87.4533	69.7998	65.7302	70.3135
1770.1	82.139	80.5206	90.2029	63.96	68.6231	66.6027
1773.27	81.8132	83.7671	77.4693	70.8287	68.0111	65.675
1776.44	82.6004	85.1385	83.8494	67.5195	68.8178	72.3928
1779.61	87.0793	77.7778	81.7138	69.3826	64.8957	66.5707
1782.77	82.8719	85.0266	81.26	72.1913	63.6996	66.6027
1785.93	85.152	76.2385	84.5702	68.2147	66.5369	70.6974
1789.1	83.1433	78.8133	85.2376	68.0756	70.153	64.9392
1792.31	82.4376	76.5743	77.0422	69.188	66.2865	62.8919
1795.49	77.1987	84.075	84.7571	68.604	66.5647	65.2591
1798.67	80.456	81.4162	81.4202	68.2147	68.484	61.4843

## Sheet: Figure 1-Fig sup 3-Panel D
Time (s)	ZB/AB-Cy5 77N0Cy3 amp-pnp						ZB/AB-Cy5 77N0Cy3 atp
0	93.3578	91.8515	96.6709	98.5931	111.424	86.8317	100	100	97.0252	98.6664	98.2147	101.183
3.689	91.0475	95.4616	93.9565	92.8531	109.961	90.8272	88.2841	90.0549	100	98.7309	100.022	96.6014
6.928	100	96.0031	94.5967	91.9527	101.97	90.3208	97.9754	90.6955	95.2326	103.893	103.377	92.7296
10.105	95.1431	90.82	91.5749	98.5931	97.6365	88.1823	88.5496	91.0311	93.7071	105.119	89.8903	99.0536
13.285	94.2505	93.115	92.548	93.247	104.052	95.0478	90.541	83.374	94.1648	91.5035	94.2783	87.1155
16.485	93.5679	96.854	91.242	90.0957	103.883	89.758	86.16	89.5668	89.2067	83.2437	94.2138	89.6967
19.679	93.4366	94.0175	91.7542	98.3118	105.121	91.8402	87.4544	98.2001	88.8253	90.7937	100.409	101.957
22.861	86.2956	92.0835	99.1549	102.589	92.5155	94.3163	93.2625	80.3539	80.2441	102.538	88.2125	98.1501
26.034	91.2313	90.8716	90.4481	97.6365	103.77	94.7665	85.1643	81.2386	83.9054	92.6651	93.2459	90.0194
29.213	90.5487	96.9572	98.233	98.3118	93.7535	91.5588	85.1643	79.0726	87.4905	84.2117	89.7612	99.6343
32.393	92.7803	94.9974	97.5928	101.238	103.264	87.7884	93.6276	79.6522	79.7101	97.892	94.0202	87.18
35.561	89.3935	94.6622	86.6581	99.6624	93.5284	94.3163	84.9652	88.2855	77.193	93.8266	95.3108	89.8903
38.734	85.1405	93.8112	98.822	98.0304	95.498	87.1131	91.1384	82.3368	81.8078	89.1805	84.3407	80.7916
41.919	84.1691	100	100	97.0174	104.615	87.6196	87.8526	83.8621	77.7269	87.4382	94.6655	87.5672
45.106	97.7947	93.605	94.7247	100.506	101.97	87.1694	86.7242	78.8286	79.7101	80.7916	92.6006	82.4048
48.297	90.2074	93.2697	91.0627	90.3208	108.441	77.3213	83.0402	79.3472	75.4767	87.8899	86.2121	84.7924
51.476	89.131	95.5905	87.9385	97.9741	100.675	88.9139	74.5768	81.1775	80.7399	80.2753	104.861	93.8266
54.668	89.7611	88.3445	93.2394	91.4463	94.5414	83.2302	79.7212	79.1946	71.3577	83.3082	92.8587	88.9223
57.843	90.785	96.1062	82.2023	91.0523	106.359	85.0872	76.2363	77.6693	76.9641	82.0822	83.3728	83.889
61.028	91.7039	96.4673	88.5787	95.1041	104.446	84.2431	76.9333	78.798	75.1716	92.8587	99.6343	90.9228
64.191	86.4269	92.5219	97.9001	96.2296	94.3163	91.2774	76.1367	72.4527	75.2098	79.6946	77.5005	79.9527
67.362	91.3626	95.5905	90.3969	96.6235	100.506	91.5588	78.6923	75.7169	77.7269	79.7591	100.151	83.8245
70.554	92.3339	91.671	94.0845	91.6151	104.727	97.1863	80.2854	75.9304	74.4851	83.5664	91.8907	81.695
73.726	87.7921	98.5044	82.8937	102.983	93.4159	82.6674	73.8467	68.2123	75.7056	87.3736	93.2459	79.8236
76.899	91.9139	89.6338	86.735	103.77	101.913	82.5549	74.9751	71.446	72.6163	81.8886	88.7288	85.7604
80.071	97.2171	90.9747	90.9603	92.6843	95.4418	91.8402	76.8337	74.1916	75.9725	70.1441	86.3411	82.2758
83.239	86.1906	92.3414	92.3431	85.3686	98.0304	87.6196	78.5596	69.8902	70.061	88.8578	85.5023	86.6638
86.415	92.2027	96.132	90.5762	92.2904	95.7794	82.2735	72.7846	72.6968	76.087	84.6634	80.9206	80.9852
89.595	90.1811	95.6937	90.5762	94.3163	92.6843	87.7884	74.4773	78.0964	74.8665	75.242	88.2125	82.3403
92.773	89.3673	91.2326	95.7746	104.389	93.641	87.4508	70.8928	72.1782	69.0694	85.8249	88.5997	84.9215
95.948	85.0879	90.4074	91.5493	100.338	92.4029	87.6196	77.5639	70.1647	70.595	76.7262	77.1134	92.407
99.126	90.7587	87.6225	97.3367	97.2988	89.4766	90.2082	68.5032	76.9067	67.6201	80.4689	75.8873	69.9505
102.292	84.6679	91.0521	96.21	96.8486	105.74	89.758	65.7152	67.4802	78.5278	71.4347	90.7937	81.1142
105.517	87.0832	87.7514	90.4481	110.186	99.7749	90.0394	70.4945	68.914	69.4508	84.3407	84.2762	80.0172
108.698	86.4794	98.1949	95.032	98.8745	90.0957	91.8965	70.1294	71.507	73.074	71.951	77.6941	80.3399
111.906	87.3195	98.556	93.3675	98.9308	88.0698	82.9488	70.2954	71.324	72.5782	71.6928	78.404	78.4685
115.075	88.5009	97.7824	90.064	98.5369	91.8402	86.888	74.079	65.9549	65.4462	75.3065	89.5676	79.5655
118.249	93.069	90.7169	90.064	104.502	85.5374	91.0523	71.0919	63.9414	63.8444	73.9514	79.1783	79.3719
121.435	89.8661	91.8257	91.2676	88.6325	89.4204	86.5504	72.154	72.4222	70.0992	75.3065	76.0809	81.9531
124.617	86.3744	90.2785	91.9078	92.2904	92.5155	95.3855	63.2592	66.7785	68.0015	70.6604	72.5317	76.7907
127.792	90.8637	98.2207	92.7273	96.5672	104.164	83.5678	68.1049	66.565	64.4165	64.1428	84.5988	70.1441
130.994	88.921	96.854	82.1511	88.5763	93.9223	88.8014	63.1596	66.5955	67.582	73.9514	78.1458	76.9198
134.19	84.4316	89.7628	86.0179	93.6972	102.307	80.2476	62.8277	62.2331	70.7475	79.1138	80.9206	73.9514
137.361	86.3744	94.6364	93.0858	83.399	86.7192	83.5115	73.3488	63.3313	71.9298	69.5633	74.7257	72.6608
140.547	84.9042	94.7138	94.6991	89.4766	84.9184	87.0568	63.4583	62.3551	69.3745	74.8548	78.7266	75.3065
143.756	85.3767	91.2326	91.114	95.4418	100.225	88.0698	68.7023	62.4466	65.9039	60.5291	75.371	71.6928
146.921	89.9711	92.9603	87.6825	92.9657	92.8531	91.39	70.2954	59.518	63.8444	77.5005	68.789	73.6933
150.092	82.9089	91.1294	93.3675	97.4114	98.4243	92.3467	62.3631	65.8328	56.4836	79.0493	83.6309	71.1766
153.27	87.6608	95.6937	88.8092	100.113	89.5329	86.4378	66.4786	59.7621	61.823	68.0792	77.9522	69.4343
156.488	91.9926	90.3816	89.2958	88.2949	88.8576	88.4637	63.8898	59.1214	62.5858	69.2407	78.0813	61.8197
159.664	83.644	88.8602	89.8335	92.009	96.3984	90.7147	64.62	61.4094	61.9375	69.4988	81.3078	72.2091
162.833	88.8685	89.2986	90.0384	93.1345	98.0867	78.7282	59.9071	64.4905	56.7124	63.9492	80.8561	67.1757
166.032	87.9233	92.0062	88.8348	93.4159	90.7147	80.4727	57.9157	69.7376	61.7849	63.3685	75.0484	59.2385
169.225	82.9089	86.4879	87.1191	91.7839	94.0349	84.9184	58.314	65.3142	64.836	67.1112	70.0796	75.8228
172.399	86.7419	86.1269	91.0371	95.892	92.2341	94.9353	65.5825	63.6059	61.8993	68.4018	66.595	79.501
175.585	80.8349	92.2125	90.3201	85.9876	96.8486	80.9792	63.0933	63.0872	59.6491	71.5638	80.598	74.7903
178.758	90.2337	96.2352	94.8271	85.3686	96.1733	93.3033	52.3399	64.216	56.9031	64.7236	71.8864	68.9826
181.954	84.1953	94.8427	94.8015	87.7321	89.9268	85.0872	59.6084	59.0604	57.5896	57.3026	78.2749	78.5975
185.146	85.3767	89.8659	86.9142	85.8751	95.1041	88.5763	59.9734	57.9927	56.5217	73.6287	71.5638	70.2086
188.347	86.952	89.608	90.0896	98.5369	93.6972	90.377	56.6877	55.6742	61.8993	66.5304	76.5971	68.7245
191.546	86.3481	90.6137	87.6825	99.381	98.3118	76.8711	57.8825	67.2971	58.505	66.4659	73.6933	73.3706
194.719	80.7824	93.2182	86.735	89.8706	91.6151	85.9313	61.5002	52.8676	54.8818	62.336	67.1757	65.3044
197.916	87.7133	92.2641	90.9859	102.645	92.628	88.2386	59.7079	64.4905	59.9542	66.3368	64.4655	71.6928
201.089	85.8493	86.1269	88.2202	86.5504	91.2212	76.1958	60.0066	57.8401	60.2212	61.1099	71.3057	63.3039
204.331	87.9496	90.6911	88.8348	93.7535	86.269	88.2386	56.9532	56.2233	60.4119	60.0774	74.145	54.8505
207.517	86.0856	87.2615	86.5813	99.2684	86.3253	80.9792	55.0614	55.0946	58.7719	59.3676	71.0475	66.3368
210.677	85.9281	88.4992	89.4238	97.5239	85.4811	92.5155	63.392	59.2434	53.5088	64.2719	73.4997	71.4347
213.854	87.9758	89.0407	92.1383	85.9313	92.2341	75.3517	59.2765	56.3453	60.8696	59.4967	69.5633	63.2394
217.035	89.7348	90.3559	89.8848	85.256	89.5892	83.6241	59.1437	61.1959	51.7162	61.0454	73.1125	63.433
220.241	83.0139	93.0892	85.9411	89.3641	88.1261	73.4947	63.392	60.9213	57.8185	65.6915	70.2086	64.53
223.427	84.5891	87.4162	84.4814	96.3421	93.1908	80.4164	58.9778	63.4533	54.5385	54.8505	64.0783	59.6903
226.623	91.6514	81.1243	89.3726	88.8576	97.1863	88.52	59.7411	56.5589	52.2883	59.1095	73.3706	60.142
229.832	90.89	94.8169	90.8323	85.1998	87.901	79.5723	60.2058	59.64	54.119	59.3031	70.1441	71.6283
233.022	84.1691	86.3847	84.1997	85.4249	92.009	89.139	59.3428	56.4369	59.9542	62.8522	73.048	63.4975
236.197	81.465	89.6338	92.5224	97.3551	98.1992	77.3776	58.0485	58.0842	57.4371	67.7565	70.7249	62.6586
239.377	85.7443	90.8716	90.3457	91.5025	92.2904	85.8188	57.451	59.6095	56.2166	68.2727	69.3698	67.8856
242.585	83.539	88.0351	88.1178	95.892	91.5588	79.2909	51.2778	60.3722	53.9664	60.2065	74.2095	63.6266
245.782	88.5009	91.181	90.6786	90.8272	99.2684	83.2302	54.1321	54.9115	59.9161	59.1095	69.8215	67.692
248.963	80.5461	87.7772	81.7157	87.4508	93.641	82.1047	56.389	54.7285	57.7422	63.7556	78.8557	57.5608
252.14	88.8947	93.1408	88.4251	94.3725	98.368	85.5374	56.4885	53.7523	56.1022	56.7219	64.6591	61.6907
255.333	78.5508	86.9778	78.4379	92.9094	91.2212	85.7062	51.9416	52.8981	55.1487	65.0462	65.8851	66.724
258.522	82.2788	86.6168	87.4776	93.1908	95.0478	79.0658	55.5924	56.8334	52.4409	56.2056	68.918	58.1415
261.703	88.1334	87.9577	87.452	92.3467	92.9094	82.78	53.7006	56.4674	58.3524	65.1108	73.9514	61.7552
264.95	83.0664	94.327	89.6543	97.13	91.0523	83.7929	57.451	55.2471	60.3738	69.7569	58.9159	61.5616
268.14	82.6989	85.4564	86.3508	88.7451	84.7496	90.377	58.5795	55.7657	49.9237	57.9479	70.0796	67.5629
271.313	92.0714	93.6823	89.0397	88.2386	93.1345	78.6156	54.5636	56.3758	53.7757	64.0783	59.6903	65.1753
274.492	77.5007	90.8716	90.3713	91.8965	94.0349	83.6804	51.9748	58.7553	51.7544	54.7214	63.1749	69.8215
277.702	82.2263	82.5683	93.2907	89.8143	93.4721	80.5853	54.464	58.9689	50.6865	56.2702	64.2719	64.9172
280.872	81.1762	79.6029	83.1498	85.8188	89.3641	91.5025	51.7424	50.7016	47.521	59.4321	67.4339	67.0467
284.036	82.6989	86.9778	89.7823	85.9876	103.883	84.1306	57.617	53.9048	55.3013	62.9168	64.2719	61.5616
287.231	87.5295	89.0665	81.9974	85.8188	87.2819	74.0574	55.4597	53.5387	54.2715	59.4321	68.918	52.0757
290.402	80.3098	85.9206	83.7644	93.5284	85.8188	82.3298	54.0657	55.8877	56.4836	63.6266	63.8847	59.1095
293.575	86.952	87.5967	86.402	101.182	84.9184	88.0698	54.1321	54.5455	49.5423	55.3022	63.1749	60.3356
296.749	86.5844	83.7803	86.8118	92.0653	95.498	87.6196	55.4265	54.1184	52.8986	56.2056	62.7877	61.6262
299.931	86.6107	88.2414	82.6376	95.7794	91.8965	78.8407	58.2144	50.061	52.479	57.2381	60.3356	62.1424
303.109	80.6511	82.852	84.1485	96.0045	88.2949	83.399	55.4597	56.8639	61.9375	61.6907	66.6595	59.045
306.289	81.1762	85.4564	78.2843	90.4896	93.5847	79.7411	54.0989	52.7456	44.8131	49.9462	61.8843	59.6257
309.452	82.3051	88.2156	86.9142	91.3337	89.3078	82.3298	50.6472	55.2776	52.8223	61.8197	60.8518	54.4633
312.62	85.193	91.3357	81.9718	91.5588	91.6151	76.3647	46.93	50.2135	48.0549	50.3334	68.7245	56.7864
315.834	80.9661	89.5823	86.5045	92.3467	87.9572	82.8362	54.995	54.0574	46.8345	58.9804	63.2394	62.0779
319.026	76.398	85.1728	87.0166	92.5155	88.2949	74.8452	50.3485	53.7218	50.6484	66.2078	73.6933	53.3018
322.189	78.2358	85.5338	85.0448	89.8143	84.6933	72.0878	56.2894	57.9927	51.4493	55.883	64.6591	61.6907
325.358	81.9375	84.3476	82.8681	87.6196	91.39	83.2864	57.5174	53.7523	54.6911	57.8834	60.3356	57.4962
328.522	76.4505	89.376	81.8438	92.2904	91.8402	87.507	57.9489	52.5625	51.1823	56.012	64.7881	60.8518
331.693	86.6369	86.3332	86.5045	88.0698	83.3427	78.6719	53.9993	54.2709	47.6735	51.6885	61.1099	48.3975
334.863	83.434	82.9293	85.8643	89.7017	88.2949	81.7107	56.1235	52.5625	50	53.7535	61.0454	63.4975
338.063	82.7514	84.2702	80.6914	93.641	90.377	84.0743	51.5101	51.0067	50.0763	50.6561	62.0133	55.7539
341.236	84.7729	87.5967	85.9155	86.1002	84.7496	86.4378	47.9257	51.7084	46.5294	68.0146	64.2074	47.4941
344.403	76.0567	85.0181	83.0218	85.256	91.8402	81.148	57.8493	53.9048	50.3432	55.3022	54.9796	51.1078
347.591	84.0903	82.5683	85.4802	86.7192	90.9398	79.3472	54.8291	50	50.9535	60.8518	58.4642	58.5287
350.802	75.4791	90.4848	82.484	82.4423	87.7321	87.0006	54.995	51.3423	55.3013	55.1086	66.0787	50.8496
353.998	91.8614	88.2156	81.8182	97.13	80.8666	80.3039	57.7498	49.1153	49.5423	57.1736	64.6591	59.4321
357.196	92.1764	89.1955	85.7106	85.256	84.2431	79.0096	59.011	53.5692	46.8345	48.1394	65.5625	60.3356
360.375	84.2478	87.5709	79.1293	92.628	88.1823	84.018	55.161	52.8066	49.1991	55.1086	53.4954	58.6578
363.581	79.4434	83.5224	80.5634	94.4288	79.4035	85.031	54.6631	43.5326	51.1823	57.9479	60.3356	59.6257
366.769	74.9015	81.3048	78.3099	85.7625	98.1992	82.4986	54.9286	56.9555	48.9703	62.8522	57.1091	58.0125
369.978	79.9685	86.3074	81.9718	93.4159	94.8227	84.5245	51.145	50.8847	54.8436	59.174	59.045	58.4642
373.156	78.6296	85.9464	81.8438	91.8402	91.6714	87.3945	49.8838	53.4777	51.0297	52.8501	60.2065	55.0441
376.328	77.3956	89.2986	80.8707	88.2949	80.6415	83.3427	47.5606	47.1324	51.2586	51.3014	56.3347	51.5595
379.519	78.7346	77.6173	82.3303	94.879	88.0698	79.1221	48.5894	53.8133	49.5042	53.3663	54.1407	50.2043
382.686	76.9756	83.0583	89.1677	103.039	83.9617	77.7153	49.7843	49.5119	50.9916	46.9778	53.9471	55.4313
385.862	76.8443	85.3275	81.8438	82.6111	76.3647	70.3995	50.78	49.2068	53.7376	62.336	64.0783	57.6898
389.047	79.3909	80.9954	87.4776	90.9961	85.5937	82.8362	51.311	51.1897	45.5759	57.1736	55.2377	55.6249
392.221	80.4673	83.0067	80.5634	82.9488	90.5459	82.386	53.8666	47.2239	47.4447	50.3979	57.3026	55.4958
395.401	76.7393	84.3992	90.525	95.6669	89.139	82.4423	48.2907	48.9628	49.3516	49.9462	61.1099	57.1091
398.575	75.1641	83.8319	79.7183	94.8227	75.0141	76.7586	47.6933	50.122	48.8558	56.1411	61.1744	54.6569
401.742	81.5175	83.7029	78.5147	87.3945	87.7884	86.2127	50.3153	51.7694	44.4317	53.3018	63.0458	56.5283
404.926	75.6892	84.8633	83.1242	96.0608	86.3815	77.6027	54.2649	50.3356	47.9405	51.6885	59.1095	52.6565
408.09	75.5579	88.7829	75.5954	89.3078	71.0186	84.8059	52.4726	48.5357	48.2075	52.1402	53.3663	57.8834
411.262	78.157	80.9954	82.4328	89.3078	92.8531	64.8284	52.8377	47.1324	53.2037	58.5287	57.5608	58.3351
414.454	80.4411	82.4136	79.6927	98.1429	84.4119	83.1176	53.9993	49.6949	45.5378	49.43	66.9176	63.5621
417.629	85.4292	81.4079	79.6159	81.4856	81.5982	75.2392	49.9502	49.817	51.4874	50.527	65.9497	56.012
420.813	78.8396	84.8375	80.7939	81.5982	84.0743	77.4339	49.2532	45.7596	48.36	55.1732	52.592	56.3992
423.981	79.5222	81.3306	77.1319	82.1047	83.5678	83.8492	50.9459	48.3832	47.521	53.818	56.3347	59.6903
427.142	79.3647	80.4538	81.5877	97.2425	82.6674	84.9184	50.3153	50.3051	41.4569	61.4971	54.3988	50.6561
430.344	79.2071	84.1155	82.7657	90.9398	90.2082	81.5982	48.2907	47.468	45.4233	53.5599	60.3356	57.6898
433.514	82.7251	77.411	81.4341	85.3686	83.1739	75.1266	55.5924	48.1391	49.9619	52.2693	51.8176	57.4962
436.695	80.9399	82.0526	78.8732	93.9786	87.2819	86.3815	44.5071	43.9902	47.4447	47.8813	59.4321	57.6253
439.871	80.7299	80.1702	78.5147	88.9139	87.4508	72.9882	50.0166	51.9829	44.3936	49.9462	54.2052	61.8843
443.079	80.4411	84.1413	83.2522	84.9184	83.0051	79.91	47.6269	45.363	45.4996	53.3018	66.5304	62.0133
446.274	76.6343	80.9696	80.4866	90.9398	82.8925	70.8497	47.1623	48.9323	48.0931	47.4296	56.4638	57.1736
449.452	79.1809	87.5451	82.5096	90.771	84.9747	62.9713	50.9459	43.8072	47.5591	58.9804	68.0792	52.1402
452.619	71.8036	80.3507	78.3867	88.8576	80.3039	77.4902	50.0166	49.3289	48.4744	54.7214	59.6257	55.9475
455.8	80.2573	82.3363	81.7414	92.7406	80.7541	77.9403	48.1248	48.6577	38.6346	52.2048	56.6573	52.3338
458.98	70.0184	87.6483	78.694	94.9353	93.1345	77.9403	52.2735	45.424	42.9825	52.592	55.2377	52.0757
462.158	77.1331	79.2677	80.0256	87.6759	75.0703	81.3731	45.0382	46.5223	47.4447	50.2043	61.4326	53.8826
465.32	79.8635	77.6689	83.2266	94.0349	96.1171	80.529	54.4308	47.7425	51.3349	52.2693	54.2052	58.6578
468.511	81.9375	78.623	81.2804	92.5155	89.6455	84.3557	51.7093	44.3868	44.6224	48.1394	58.1415	54.0761
471.684	74.429	79.9123	77.7721	93.0219	80.3039	78.6719	53.933	44.6309	46.9489	52.7855	54.3343	49.6881
474.903	74.1664	80.5054	79.1037	83.7366	86.6066	74.2825	47.9257	50.3661	42.1815	53.4954	57.4962	57.7544
478.071	83.8803	77.9526	80.0768	79.7974	87.9572	72.8194	46.8636	51.6473	45.2708	49.8172	63.6911	48.2039
481.25	73.8777	81.7432	80.8195	87.0006	82.6674	91.3337	50.614	50.6406	51.9069	49.6881	62.465	51.2368
484.43	71.3836	79.8092	83.662	86.2127	78.5594	79.4035	50.3153	46.0647	49.0847	51.7531	46.4616	55.3667
487.609	77.6844	81.2532	79.5903	83.2302	85.4811	75.6331	51.2446	48.3527	50.8391	48.9137	56.0766	47.4296
490.792	71.7774	76.1991	76.21	83.6804	86.9443	79.4035	43.2459	43.5937	54.8436	52.4629	56.4638	51.8821
494.015	77.2119	77.6947	78.2586	84.637	76.0833	88.8014	45.0382	49.2068	42.4104	48.3975	67.5629	53.5599
497.231	73.2476	82.4394	75.7746	80.5853	85.9313	87.507	48.689	48.7187	47.4066	50.7851	60.0129	58.0125
500.408	75.9254	77.05	81.1012	96.0045	83.7929	71.2999	48.0252	51.0677	50.1907	50.9787	58.3351	63.9492
503.573	77.3694	79.8092	79.4366	73.8886	83.6804	81.3731	41.9515	44.8139	51.6781	50.3334	59.8838	52.6565
506.743	75.0591	83.4193	80.5122	86.269	87.2257	72.5943	54.2649	47.0409	43.135	54.0116	59.6257	53.6244
509.945	72.1449	80.2991	75.032	92.5718	84.9747	79.6849	47.992	43.014	51.2204	50.2043	60.9163	47.8813
513.167	78.4195	84.296	75.3393	95.9482	87.6759	80.4164	45.3701	46.6138	48.2456	54.786	66.1433	47.365
516.392	75.8467	77.8494	76.6709	88.52	87.2819	81.8796	51.2114	44.3258	51.2204	51.2368	49.8817	54.3343
519.611	73.7201	76.1217	80.0256	81.6545	82.8925	75.4643	47.2951	47.6815	51.64	50.4625	54.3343	58.9804
522.844	75.7417	82.3878	75.9027	91.8402	86.1002	80.0788	50.2157	49.0543	47.3684	48.6556	51.1078	44.3321
526.012	76.7918	81.8205	79.6671	95.2167	84.4682	72.7068	50.8795	49.8475	47.254	49.1719	54.915	51.2368
529.215	72.7488	76.8953	78.7964	76.1958	77.8841	77.8278	53.1364	47.4985	43.2876	54.4633	48.7847	51.3014
532.392	79.6009	82.3878	75.5442	85.4249	91.8402	79.4035	52.4726	44.4783	51.6018	43.1706	56.0766	49.4945
535.557	76.6343	76.0186	81.2292	88.4637	81.9358	70.6246	48.689	50.2441	48.5889	52.0757	54.4633	42.4607
538.756	82.8301	79.2161	78.3355	83.1739	81.9921	81.9921	54.7627	49.0543	47.8642	54.1407	60.7873	46.3971
541.927	78.2095	80.9696	80.5378	87.8447	89.1953	80.0788	52.8045	50.9152	48.9321	53.5599	53.4954	57.5608
545.107	76.4768	80.8406	75.3393	86.3253	83.399	72.0878	47.3282	42.953	46.5294	50.2689	58.077	48.6556
548.289	72.3812	81.4337	80.5634	82.8362	82.1609	80.3602	47.5606	51.0372	48.0168	41.2347	57.6898	50.8496
551.467	72.4337	82.6199	72.2919	90.8835	77.7715	76.5898	52.1075	47.529	47.6735	50.7206	54.5279	46.139
554.635	72.8538	77.2047	78.5403	88.8014	81.8796	72.3692	48.9545	47.7425	42.6392	42.7834	52.4629	58.8514
557.801	75.5579	86.9263	75.4161	91.3337	80.9229	76.3647	52.0743	50.3356	41.6095	45.3001	55.6894	49.559
560.983	73.1688	79.7318	74.5967	87.3945	74.789	70.906	47.7265	49.1153	49.9619	52.2693	49.8817	51.4304
564.152	75.0853	77.9526	76.0563	85.4249	77.1525	72.0315	51.9416	51.7389	41.6095	49.8817	59.2385	45.6872
567.326	74.849	80.5054	75.7746	82.4423	85.0872	77.3776	47.461	47.0409	45.1182	51.3014	55.4313	45.7518
570.507	72.565	80.2218	75.6466	84.637	77.8841	75.3517	48.4235	46.5528	43.0587	50.6561	47.0424	44.4612
573.718	73.2738	85.6627	78.1562	86.3815	91.8402	76.5898	48.9213	45.119	44.5461	46.139	54.8505	50.3334
576.894	73.4576	85.7916	76.1588	89.4204	83.7366	84.0743	45.8679	46.1867	46.0336	51.4304	55.6249	56.4638
580.073	72.3812	74.1104	71.242	96.7923	82.4423	64.9972	50.3153	43.7157	52.0595	45.9454	65.4334	51.624
583.267	71.1998	80.2476	82.9449	84.4682	79.4598	73.6635	45.6688	44.9664	40.9611	53.4954	54.3988	47.9458
586.476	74.8753	84.064	72.7017	82.4986	82.7237	80.0225	46.3989	53.5387	48.2456	55.2377	52.7855	57.5608
589.659	73.8514	76.8179	79.6671	85.3123	90.3208	74.4513	49.5519	46.1867	47.5591	50.0108	53.6244	56.7219
592.838	74.7178	82.0784	78.9501	77.5464	78.9533	74.1699	56.8536	47.3459	45.9191	49.1073	55.1732	45.8808
596.019	72.0137	78.3394	74.9552	86.269	85.9313	67.8109	46.6313	48.1086	41.8764	45.8163	53.818	50.3979
599.204	71.7774	75.4255	77.1319	85.9876	84.0743	75.1266	49.1869	46.1562	45.6903	47.1069	48.5266	46.9778
602.383	71.4623	76.5343	76.6965	91.1649	78.3905	69.3866	45.3369	47.407	48.3982	42.3962	54.5279	46.7197
605.558	70.5697	82.2847	80.9731	94.1474	77.9966	77.8278	44.4739	47.9866	45.0038	56.7219	54.5279	52.0112
608.759	76.6605	73.5431	75.7234	79.516	85.4249	81.767	45.4696	47.651	43.0206	52.7855	51.1078	39.1052
611.926	70.2284	81.7174	78.5403	91.8402	83.7366	86.0439	50.8795	56.8029	45.4233	48.333	53.0437	47.5586
615.147	75.7942	79.1387	69.4238	87.901	80.2476	82.8362	48.0584	45.3935	42.4485	53.1082	54.2052	42.009
618.317	74.0089	77.4626	77.3624	71.9752	75.5768	72.2003	47.9257	44.5699	43.8596	53.1082	55.9475	47.5586
621.494	73.2213	75.3997	70.8067	92.6843	83.6241	69.3303	48.2244	47.529	53.0511	52.9791	50.9787	52.2693
624.725	68.8107	76.6117	76.7734	91.5025	80.9792	73.2696	52.1407	45.363	44.508	45.7518	51.8821	51.4949
627.887	70.8585	74.9097	78.8732	95.8357	79.6286	74.8452	52.3399	51.0372	46.6438	60.9809	62.2069	49.2364
631.076	73.3526	83.1614	75.1088	88.0698	78.1654	74.3388	44.6399	46.7968	44.2029	41.4928	54.915	40.783
634.272	77.2644	79.1129	74.7247	78.1654	90.7147	77.4339	45.3369	43.8072	44.8131	47.6231	55.883	49.6881
637.457	75.2166	81.1243	75.2369	89.5329	85.1435	73.1007	47.2287	44.1123	43.7071	54.2697	51.1723	47.6877
640.632	71.8561	75.2965	73.854	76.4772	80.8666	71.6939	48.1248	45.4851	40.6941	46.7197	54.2697	45.8808
643.849	72.3287	78.984	75.5442	90.5459	83.1739	73.6635	49.1205	49.4509	44.0122	46.7843	53.0437	50.0753
647.02	70.1496	74.9871	78.0026	88.4637	78.5594	71.4688	44.4408	49.8475	52.9748	52.9791	48.5911	49.1719
650.202	72.7225	70.6034	76.4661	93.8098	81.4856	73.0445	51.4437	46.5833	41.4188	51.1078	57.8189	46.9778
653.382	71.4098	81.1501	76.0563	90.8835	84.018	69.4429	47.4278	45.6986	41.3043	48.333	46.0099	47.0424
656.577	73.3263	71.5059	76.5941	89.3078	77.3776	73.776	48.5231	44.3258	44.775	46.8488	53.4954	42.5898
659.756	67.8393	70.9902	73.4187	85.7062	75.8019	72.7068	47.992	47.3154	43.5927	56.6573	53.4954	47.5586
662.93	70.1496	71.2996	70.5762	88.1261	83.0051	71.5813	43.5778	44.2343	41.0374	45.7518	50.1398	50.8496
666.119	72.3024	78.7004	77.388	88.52	72.2566	71.2999	49.6515	46.2477	47.7117	50.9787	61.6907	48.3975
669.309	71.1735	76.4569	81.2804	81.5982	71.8064	79.5723	47.0627	45.6071	41.3806	48.2039	48.0749	49.1073
672.467	71.0423	78.1588	73.1114	85.8751	78.3905	77.04	48.0584	45.2105	41.0374	53.8826	55.3022	48.3975
675.652	70.4122	72.0732	77.7465	95.5543	75.408	68.655	46.93	44.1733	46.8345	56.9155	52.5274	48.0103
678.826	71.4886	77.7463	70.4225	81.3731	81.6545	69.7805	46.6313	47.1629	48.0549	47.0424	52.6565	48.3975
682.013	72.3812	73.4399	77.7209	84.1868	76.4209	72.9882	51.2778	41.8548	49.0465	51.1078	58.2061	55.9475
685.173	69.9396	72.7695	72.4968	84.8059	77.7153	64.0968	46.3989	47.2849	45.614	45.2355	55.883	50.1398
688.339	69.6508	82.9293	74.0589	94.2037	80.529	72.7631	47.3614	44.2343	44.8894	50.0753	53.7535	48.7202
691.519	72.8013	77.2563	68.0922	88.9702	82.9488	74.5639	46.1002	44.4783	40.7704	51.1723	58.3351	44.1385
694.7	73.7989	73.5946	69.8848	87.6196	76.9837	76.1958	43.7106	48.5052	49.8474	48.5911	55.6894	47.9458
697.863	68.4169	72.3827	77.6184	84.4119	84.3557	75.1266	47.0295	42.6785	43.7452	47.0424	54.4633	47.6877
701.063	74.0614	83.8834	72.42	87.7321	79.0096	70.3433	49.7511	49.5729	45.3852	56.5283	57.7544	44.0095
704.228	71.8824	76.1733	78.7708	82.1609	70.6809	73.3821	46.6976	46.2782	38.5202	45.8163	52.0112	50.9142
707.425	67.7343	72.1248	72.2407	95.3292	75.2392	75.0141	46.3989	44.3563	42.9443	49.0428	52.0757	49.0428
710.616	75.2166	77.3337	76.1332	85.1998	74.3388	69.2178	48.2576	44.2953	43.8596	53.818	60.4646	45.8163
713.781	73.0375	77.7205	72.3431	84.1868	81.6545	70.5121	50.7468	44.3563	42.3722	50.2043	48.5911	48.1394
716.959	76.2667	74.7808	71.6261	83.4553	83.4553	66.9105	48.2244	44.4173	43.2494	46.9778	57.0445	39.4278
720.127	71.0423	73.7236	75.7746	89.8706	88.1823	70.7372	48.4567	46.7358	43.9359	44.9129	60.7873	45.3001
723.307	68.6532	76.689	78.0026	91.6151	69.5554	63.1401	48.1912	44.4173	45.8047	52.6565	51.1078	45.8808
726.488	68.9682	67.4317	67.9641	86.9443	79.6849	71.4125	51.4106	45.6376	49.2754	54.7214	51.3659	48.462
729.677	68.732	75.4771	70.2945	79.4598	72.8194	74.2262	53.7006	49.1763	47.5973	41.0411	40.1377	46.139
732.874	69.7558	77.7978	64.5327	83.0613	80.6415	74.1137	40.6572	47.5595	41.9527	42.9125	47.7522	47.6231
736.078	74.5603	71.2223	70.1665	87.901	80.8104	75.9145	47.2951	50.2746	43.5545	47.4941	52.6565	45.1065
739.253	70.4122	73.4657	69.8335	79.6849	83.2864	68.3737	47.4278	41.1226	43.9741	45.1065	54.0116	43.6223
742.442	72.1712	76.1991	74.3406	90.8835	76.4209	73.8886	44.1421	45.9121	41.9146	49.3655	54.2697	43.2996
745.612	69.047	72.1506	71.4725	83.5678	74.6201	69.5554	51.1782	48.9323	42.0671	52.1402	47.6877	46.0099
748.82	73.3001	71.8154	73.1626	88.0698	72.5943	70.6809	45.702	42.5564	46.5675	55.1086	53.818	54.3343
751.986	67.3405	73.5173	74.3918	83.9055	73.3821	73.5509	41.8188	42.4649	45.042	40.5248	53.1082	47.1069
755.213	74.2452	77.9268	76.9014	85.0872	91.6151	79.1221	42.1507	45.5461	46.7582	47.6877	54.2052	44.8484
758.394	69.5983	77.772	75.9283	85.9313	82.6674	72.3692	47.4942	47.834	43.0969	48.0749	37.4919	46.5907
761.566	69.2045	74.6777	71.8054	83.7929	77.8841	70.3433	42.0511	45.5461	43.9741	45.6872	46.268	49.1073
764.753	77.9732	72.6663	67.6312	86.888	78.897	71.1874	46.9632	43.6242	37.7574	54.0116	51.1078	37.6855
767.923	72.3812	69.3141	69.1421	86.269	76.0833	74.1137	47.0627	47.0714	43.6308	47.236	47.5586	44.4612
771.087	67.8918	78.3651	69.7055	77.8278	80.0788	71.0748	50.6804	43.2886	44.7368	47.6877	51.8821	53.689
774.254	66.7367	79.345	76.1844	91.6151	87.6759	67.1919	46.1334	44.6309	44.8131	57.8834	57.6898	40.8475
777.413	67.7868	76.1475	74.6991	87.4508	80.7541	73.9449	43.611	46.3392	41.3043	39.4278	43.8804	49.2364
780.586	74.3502	73.8267	73.2907	80.8666	89.1953	70.906	45.4364	46.4918	45.9573	43.3642	52.3338	40.8475
783.786	74.2977	69.443	74.5455	84.018	80.2476	67.417	43.9429	49.5119	43.9741	50.1398	48.3975	47.236
786.975	69.2045	75.967	72.5224	96.9049	86.1002	68.655	51.4769	50.4271	45.4615	50.0753	53.1082	46.2035
790.144	69.8346	74.1877	77.2855	72.538	79.6849	77.04	46.9963	43.8377	46.6438	43.1706	54.786	42.0736
793.307	69.3095	74.3167	72.3431	92.1778	74.9578	70.5684	49.7843	45.9426	41.9146	48.3975	54.1407	43.2996
796.484	71.7511	70.6034	66.0435	81.4856	75.6331	68.5425	46.93	46.6443	39.3593	47.8167	49.1073	51.624
799.656	70.7535	75.2192	71.5493	84.3557	82.2172	74.7327	50.2489	45.3325	45.1564	49.0428	61.1744	45.9454
802.824	71.0685	71.9701	73.598	81.148	76.5898	71.7501	45.0382	47.1934	45.0038	45.0419	48.0103	50.0108
806.005	62.116	68.0248	72.9321	90.1519	78.897	67.9235	48.6558	44.4173	42.2197	45.8163	50.7206	45.2355
809.194	72.3812	68.8499	74.4174	86.3253	77.2088	76.4209	52.5722	45.5461	38.9397	50.4625	53.6244	48.9137
812.364	68.732	76.2249	70.3457	87.9572	81.3168	75.2954	50.5144	41.9158	41.3425	47.1714	55.0441	45.3646
815.567	71.6198	70.4229	73.9821	80.6978	77.7153	70.7935	43.1132	44.2038	46.5294	49.4945	52.6565	48.2039
818.735	66.1066	73.2594	74.4686	86.1564	79.516	83.2864	44.8058	45.1495	42.0671	48.2684	49.559	50.2043
821.95	70.2547	73.1821	72.1895	88.9702	85.0872	79.3472	45.4364	44.3868	42.5248	46.3325	48.333	49.8817
825.129	67.6293	75.6576	72.0871	81.7107	81.3731	64.8846	50.1825	46.3697	47.521	51.3659	44.2676	41.4928
828.372	72.5125	68.7726	68.169	85.7062	81.148	74.6764	45.2705	47.4985	45.6903	48.2039	55.883	46.3325
831.535	67.6293	69.3399	69.2702	84.5245	78.3905	65.6162	45.5692	46.9799	39.1686	43.8804	48.2039	50.6561
834.705	71.1473	70.1135	69.6799	80.4727	85.8188	68.8239	45.6024	44.7224	47.3303	46.7197	53.4954	50.0108
837.879	70.7272	75.1934	77.516	82.0484	71.1874	66.2915	48.5563	44.9359	41.2662	51.0432	48.5266	51.0432
841.066	71.5936	66.6065	64.968	85.65	84.4119	69.1052	47.5274	40.0854	47.1014	46.5907	48.462	41.6219
844.232	68.3119	75.1676	66.9398	81.2606	70.287	63.4215	51.9748	48.4747	45.9954	49.2364	42.2026	46.0744
847.393	66.2904	67.9732	71.37	80.9229	73.776	78.278	46.1002	42.709	35.8505	50.2689	50.2043	38.0082
850.565	65.634	71.5833	71.6773	86.2127	74.1137	65.785	52.3067	44.3563	45.8047	43.2351	44.6548	49.0428
853.752	71.1998	68.3858	69.8592	89.1953	72.4817	71.525	42.4494	49.2678	41.5332	44.7193	56.7219	48.5911
856.938	67.3405	70.2424	66.4277	88.5763	74.2825	74.395	40.7899	42.2209	46.8726	40.4603	52.1402	42.8479
860.145	60.7509	77.7978	64.507	79.9662	72.9882	69.8931	50.0166	44.2343	38.6728	46.9778	46.5261	44.4612
863.38	66.9205	67.7669	69.5006	79.0658	73.6635	71.2437	42.1507	43.075	44.4699	54.1407	48.9137	52.3338
866.577	68.0231	70.3713	75.3905	83.7366	70.4558	79.2909	49.0209	42.0683	41.9527	40.6539	48.462	45.2355
869.765	66.5529	72.8468	79.7951	83.2864	74.2825	57.9066	43.777	39.5363	39.9695	49.6881	58.4642	41.4928
872.973	66.2116	71.2481	70.9603	82.6674	67.8672	77.9966	48.855	44.8749	41.2662	40.783	56.7219	44.2676
876.176	67.3405	69.8298	66.4277	90.377	71.7501	71.2437	45.7683	44.1428	42.296	53.0437	49.8172	52.4629
879.382	67.0517	67.8958	67.58	82.6111	78.7845	64.4907	46.7308	41.2142	48.5126	42.8479	57.4317	43.4932
882.562	69.4933	66.3744	68.6556	80.8666	71.4125	70.1182	42.7149	36.7907	40.3509	51.3659	55.9475	52.9791
885.74	65.3977	76.9727	69.5775	77.8841	74.8452	61.7895	49.4524	43.2886	40.8085	44.7838	49.7526	47.3005
888.944	73.0375	73.8783	70.2689	82.4423	81.2606	70.8497	42.7813	43.8987	43.4783	48.3975	55.3667	53.7535
892.12	67.9968	67.9732	74.1101	86.0439	75.1829	66.6854	46.1998	47.0409	44.3555	48.2684	49.559	43.2351
895.296	67.393	70.0361	66.0179	75.2954	78.0529	66.5166	49.22	41.6412	43.0969	47.7522	50.2689	45.2355
898.478	69.5721	66.9933	71.6773	85.65	74.5076	62.4086	43.9429	42.0683	35.3166	46.2035	55.2377	41.6219
901.669	69.257	67.5606	69.0141	88.6888	74.1699	69.1052	48.0584	40.7871	41.495	45.171	54.5279	37.5565
904.835	69.3358	70.294	69.4238	82.1609	73.0445	57.7378	49.4192	44.7529	41.8383	49.1719	46.5261	45.5582
908.019	64.1638	65.4461	70.7298	81.7107	78.3343	70.906	42.0179	43.5631	44.3936	53.3018	52.0112	48.5911
911.186	65.109	67.5864	66.1204	81.0355	80.3602	68.8239	44.5071	42.5564	40.6941	49.8817	54.0761	46.4616
914.359	63.5862	67.4059	76.2356	84.2994	76.0833	62.6337	43.9097	44.7224	41.9908	41.0411	53.4954	40.3958
917.545	66.2641	63.9505	67.3496	79.5723	71.6939	70.1745	49.0209	40.9091	45.6903	44.2676	50.7851	44.5257
920.716	65.8178	60.4951	69.6543	79.91	67.5295	71.1874	47.461	45.0885	38.1388	44.3966	55.883	48.0103
923.881	71.8561	68.1795	68.0666	78.7845	76.9274	64.0968	43.9097	44.1733	44.9657	46.7843	53.9471	41.7509
927.087	68.4957	65.9618	74.0845	77.2088	74.0574	71.6939	46.067	41.4887	43.7071	44.2031	55.3022	49.8817
930.251	67.183	71.0418	65.096	70.7935	69.7243	65.3348	46.6976	43.8072	41.4569	50.3334	53.6244	56.7864
933.419	65.214	71.016	65.8643	87.1694	68.0923	68.5988	45.1709	43.075	41.4569	43.8159	57.0445	46.9133
936.6	69.2308	77.0758	72.8809	74.4513	66.1227	65.0535	40.0929	47.1019	40.2746	40.0086	45.6227	48.462
939.774	71.2786	73.2594	71.1396	96.3984	71.4125	70.6246	48.3571	45.8511	46.415	47.3005	53.3663	42.0736
942.974	69.2833	66.8644	65.4033	86.888	69.8931	72.0315	46.4985	44.0207	47.7498	57.9479	51.8821	53.7535
946.189	65.1877	69.1336	71.4213	80.529	74.9015	70.2307	45.3037	45.058	43.3638	46.8488	51.4949	47.4296
949.378	64.9777	69.1594	70.9859	80.5853	76.4209	65.5599	45.9343	42.0073	43.2113	49.43	52.0112	45.3001
952.557	69.4408	72.3569	68.3483	74.9015	72.0878	70.5684	39.6283	40.3905	41.1137	44.3321	50.527	46.2035
955.72	63.98	72.6921	65.4545	85.5374	79.8537	58.0191	46.1002	45.8206	42.1053	51.6885	46.139	45.6872
958.942	67.5768	62.6612	68.1434	85.9313	67.8109	69.049	41.6528	42.4344	44.8513	46.3325	51.624	46.4616
962.124	69.0995	66.787	65.8131	80.1913	78.278	80.9229	42.7149	46.0037	41.8002	41.3637	48.2039	47.236
965.328	69.362	75.5802	71.1652	82.8925	74.8452	72.2566	45.9343	38.1025	43.402	49.0428	47.0424	41.9445
968.493	68.1019	78.3136	66.146	86.4378	81.3731	69.049	49.7179	43.5326	42.8299	42.9125	45.4937	39.4278
971.711	67.4193	67.2254	68.4251	73.4384	81.8796	56.1058	44.1089	43.1361	44.1648	42.009	52.8501	45.2355
974.881	66.9992	69.5719	71.37	87.7884	84.2994	73.4384	44.6067	44.3563	46.8345	45.4291	49.4945	48.3975
978.057	65.3452	75.0129	70.2945	77.2088	72.2003	67.8109	40.458	42.4954	42.5629	44.8484	53.2373	37.621
981.243	64.2688	66.1423	69.1933	82.3298	73.6072	73.8323	49.1205	43.7157	43.3638	47.3005	39.3633	46.7843
984.426	69.3358	69.5719	64.0461	73.4947	70.3433	69.5554	42.2502	42.892	40.6178	48.9137	46.3325	46.8488
987.607	61.6697	68.231	68.4507	78.3343	71.1311	66.798	46.0339	44.7224	37.91	47.365	53.5599	44.5902
990.804	67.1567	67.9216	66.6325	87.7884	70.6246	68.1486	47.8925	41.4277	38.9779	42.977	49.0428	51.3659
993.982	64.7414	70.1392	68.3483	79.4035	77.9966	59.5385	43.5115	41.4582	38.1007	47.8813	58.4642	42.4607
997.182	70.2809	70.294	72.9577	85.8188	70.906	70.3433	46.8636	46.4918	48.627	46.9133	47.6231	46.0099
1000.35	62.8774	74.9097	64.6095	84.4119	74.1137	62.7462	42.4494	41.9768	45.2326	46.8488	44.7193	36.9757
1003.56	64.7939	70.8355	70.6018	78.2217	82.1047	66.0664	47.5938	42.1599	48.5126	48.0103	45.8808	38.8471
1006.75	64.3739	68.4631	65.0448	78.8407	70.0619	60.045	47.1955	44.2343	44.0122	45.2355	56.7864	41.5573
1009.93	59.0181	71.0418	66.863	81.5419	75.8582	65.3911	41.7524	40.3295	39.7788	43.8804	46.2035	36.7176
1013.14	67.7343	64.4146	63.3291	88.9139	79.1784	70.9623	51.0455	44.6919	45.2708	39.3633	48.333	43.6868
1016.33	65.9228	70.526	70.2945	85.8751	84.4682	65.2223	43.2459	46.0952	39.9314	45.5582	56.9155	48.7202
1019.51	68.2069	66.426	65.0448	72.2566	70.0619	72.6505	43.0468	47.4375	39.8932	40.5894	54.0761	47.5586
1022.69	61.906	65.343	60.2305	91.2774	75.9145	67.6421	49.4856	38.9567	41.762	47.236	46.7843	48.462
1025.86	64.3213	70.0361	69.7567	80.6978	78.6156	63.1964	49.3196	38.4686	47.6354	42.0736	58.3997	47.8167
1029.03	68.7057	67.3285	70.7042	90.771	65.7288	66.7417	50.8463	42.953	37.8337	44.5902	48.8492	43.8804
1032.21	60.9609	67.9732	64.7119	81.6545	68.2048	72.0315	43.3123	48.2001	44.0885	44.3321	54.9796	47.7522
1035.4	61.6697	64.3889	71.5237	85.3686	67.1919	62.1272	43.9429	43.014	46.3387	46.9133	44.074	40.9766
1038.58	65.9228	70.6292	67.9385	82.4423	69.2741	71.4125	44.4408	41.0921	38.0244	45.7518	55.5603	34.5881
1041.77	63.5337	66.5034	70.3457	84.5808	73.4384	65.8413	46.9632	42.5259	41.8383	46.5907	50.9142	38.9761
1044.93	57.6529	63.6411	67.6312	82.8362	67.8109	66.179	40.1925	46.2172	39.4737	38.3308	50.6561	48.0103
1048.12	63.0874	69.0562	65.3777	92.4029	71.8627	75.4643	42.383	50.2746	44.8131	44.1385	47.5586	41.2992
1051.31	68.2331	69.443	67.2471	83.7929	74.7327	69.5554	43.9429	44.9054	39.7025	51.3659	52.0757	42.0736
1054.5	71.7511	69.7267	66.7862	82.6674	72.7631	63.3089	39.23	42.3124	37.7956	42.977	47.6877	47.5586
1057.67	61.0134	73.9814	63.6364	75.6894	71.525	69.5554	44.0425	46.2172	44.4317	39.8795	51.2368	46.2035
1060.85	64.0063	63.6668	69.9616	83.9617	76.8711	72.8194	43.5115	41.8548	41.0755	51.9467	48.9783	46.0099
1064.02	58.5981	71.3512	68.5787	76.646	67.8109	64.7158	43.2791	44.5699	45.0038	43.6223	42.3962	45.5582
1067.22	61.7222	59.7473	66.3252	83.5115	72.6505	58.3568	44.0757	40.543	36.1937	46.268	55.4313	48.9783
1070.4	65.2927	66.3228	68.3227	89.5892	68.2611	71.6939	42.549	41.8243	45.6903	44.2031	52.9146	41.7509
1073.57	68.7845	64.9304	66.6069	78.6719	80.5853	62.1272	48.5563	41.5497	36.9565	51.0432	44.7193	45.6227
1076.74	65.7128	66.9417	67.1447	79.5723	69.4992	68.8801	44.5071	43.4716	43.8215	49.559	56.012	43.106
1079.92	65.4765	62.197	66.402	79.5723	70.3433	67.3044	43.5778	40.8786	42.1053	42.2672	54.7214	43.106
1083.11	64.1376	65.3687	62.7913	85.8188	76.9837	68.1486	47.0295	39.2007	42.5248	51.4304	48.2684	42.977
1086.3	64.6101	67.1738	62.8681	90.1519	75.8582	66.9668	45.536	41.4582	38.7109	40.2667	50.1398	43.2996
1089.5	61.9323	64.8788	70.9091	77.659	61.5082	64.8846	44.5735	44.5088	42.029	43.7513	51.9467	49.4945
1092.67	67.603	65.4977	67.3239	84.2431	64.6595	66.179	44.9718	42.4344	44.9275	47.365	50.0753	46.3325
1095.83	66.4741	63.4605	69.1677	87.2819	71.919	70.4558	44.8722	45.6071	42.2578	41.5573	59.1095	41.0411
1099.03	65.4502	66.426	62.8937	82.4986	70.9623	64.8846	50.1162	46.4613	41.5332	47.0424	49.4945	51.0432
1102.2	65.319	68.231	66.3252	87.507	81.8233	60.3264	42.1507	44.7224	43.3257	52.592	43.106	42.5253
1105.37	61.486	69.1336	66.3508	81.3731	76.7586	65.2786	39.7942	43.5631	41.1899	41.6864	52.9146	45.6227
1108.54	66.3429	68.0763	68.9629	91.1649	80.3602	64.6595	43.1132	43.3496	41.2281	50.9787	44.2031	44.9774
1111.7	64.2163	65.8071	68.0922	74.5076	71.2437	66.0664	45.3369	39.6888	44.7368	43.7513	49.3655	47.236
1114.93	64.0326	65.3687	69.7823	74.4513	75.1266	57.1187	45.0382	46.0342	44.3173	53.4308	53.6244	44.9129
1118.1	59.5957	65.2656	63.3547	78.1092	72.3129	67.3607	44.0757	46.3392	41.4569	45.2355	53.0437	42.5898
1121.29	61.5385	67.999	62.7145	75.0703	74.9015	56.2183	42.0511	36.9128	47.0252	47.4296	49.6881	47.1069
1124.48	65.1877	65.7298	64.2766	74.9015	78.7282	65.7288	43.5115	38.7431	37.9481	47.6877	49.8172	43.6223
1127.69	64.1638	74.5745	68.8604	86.4378	72.0878	72.538	48.9877	44.1123	40.5797	46.0099	47.1069	45.171
1130.9	61.1709	62.5322	65.5314	88.6325	80.0788	56.6123	47.8593	43.6242	40.389	49.559	46.9133	39.3633
1134.07	64.3739	63.4605	63.3291	85.5937	72.1441	67.1919	41.3209	42.9835	37.5286	49.1719	50.3334	45.6227
1137.25	63.6913	65.4461	64.7631	77.3776	79.0096	63.4778	42.1507	41.8853	38.9779	44.8484	47.236	45.6872
1140.45	60.5933	66.1423	62.8425	79.1221	68.8801	66.0664	43.3123	38.316	41.8002	43.8804	50.527	41.4928
1143.65	60.5671	68.9273	70.4225	89.139	72.1441	62.8025	49.6515	46.0952	42.4104	47.9458	58.2061	39.5569
1146.83	60.6983	70.9386	62.5864	84.6933	72.2003	69.7805	44.6731	41.0311	35.7742	44.9774	53.1727	45.8163
1150.06	59.8057	71.0933	62.4328	77.1525	74.0011	67.2482	41.5201	43.8987	41.0374	39.6214	44.9774	38.2018
1153.26	68.1281	69.082	66.4533	83.3427	75.8019	65.5037	42.9472	44.3258	43.4783	44.0095	44.6548	45.0419
1156.43	62.3786	65.1367	64.7887	81.8796	72.3692	61.9584	39.3296	42.8615	42.6392	46.139	52.5274	44.5902
1159.61	61.9848	66.6323	68.5787	79.4598	75.9145	70.3433	43.3787	45.5461	40.2746	55.6894	45.171	46.0099
1162.82	63.1662	63.3316	63.1754	78.4468	75.5768	69.7243	45.8679	45.2715	40.8848	52.5274	50.6561	39.9441
1165.99	62.3261	65.2914	64.6351	79.3472	66.0664	65.4474	44.7395	37.5534	43.135	47.3005	54.0761	42.3317
1169.16	67.1567	66.6839	59.9232	80.6415	72.6505	61.9021	44.6067	35.0519	42.7155	42.5898	50.2689	48.7847
1172.34	67.0517	62.7385	65.8643	81.767	74.4513	67.5858	44.0093	44.4173	35.5454	44.7838	41.2992	45.0419
1175.52	63.2449	64.6725	66.5301	74.5639	77.5464	63.3652	47.5938	41.1531	46.6819	41.2992	50.8496	41.4928
1178.73	55.9989	69.6493	64.968	82.5549	74.6201	71.4688	45.4364	42.5564	45.4615	54.5279	49.1719	40.8475
1181.89	64.2163	68.5147	64.507	72.538	75.9145	63.0276	42.3498	41.3057	44.9275	40.5894	50.7206	49.43
1185.06	66.0803	65.575	61.6645	83.6241	71.4688	59.0884	44.308	39.1092	39.283	47.0424	48.2039	42.977
1188.21	67.2355	71.6349	61.5621	80.0225	79.0658	60.664	43.8102	42.7395	40.122	43.4932	47.8813	38.3308
1191.37	59.0444	65.936	64.2254	81.5419	70.287	63.2527	38.4666	45.363	37.9863	42.6543	41.2347	40.912
1194.56	61.7485	59.9278	69.5519	85.4249	71.0186	64.8846	43.5446	42.9835	39.2449	45.3646	48.7202	44.2676
1197.72	60.4883	65.4977	62.4328	81.9921	71.1311	58.7507	44.8058	41.9463	40.923	43.4287	43.9449	40.2667
1200.88	60.0683	63.409	64.1997	75.8019	70.7935	62.3523	43.8433	37.5839	39.1686	39.6214	48.462	48.333
1204.05	63.4025	69.1851	62.9962	80.2476	65.1097	72.8756	41.6196	41.7023	41.4569	53.2373	41.3637	44.8484
1207.22	58.388	64.5952	62.1511	81.767	74.0011	62.8025	43.7438	39.5668	39.55	45.171	50.3334	41.5573
1210.39	60.147	67.6637	59.8464	78.5031	66.5166	72.1441	43.2459	39.9024	41.1899	43.4287	53.9471	41.4283
1213.58	63.4287	67.0964	69.9872	84.5245	71.0748	62.9713	43.4451	42.5564	41.8764	41.88	48.0749	44.0095
1216.78	68.7845	68.1537	68.0922	76.4772	78.8407	64.9972	48.0584	43.8377	42.2197	44.4612	49.0428	47.1714
1219.96	62.5361	65.704	62.0999	86.4941	67.2482	58.3005	46.3326	42.709	40.7704	42.2672	48.462	42.0736
1223.13	60.1995	61.0882	65.1472	76.646	71.525	62.2397	45.6356	44.9969	38.4439	49.4945	50.3334	43.4932
1226.31	64.4526	71.1191	66.3252	88.1261	78.7845	63.4215	43.6774	43.5631	39.55	39.7505	60.0129	45.3646
1229.47	62.3523	64.8014	62.1511	80.6415	75.6331	67.9235	41.8188	38.7736	38.9779	53.4308	46.8488	41.2347
1232.64	54.5287	64.3631	59.3342	84.1868	72.8194	58.9195	45.4033	41.7328	41.0374	44.1385	46.7197	42.1381
1235.82	58.8343	65.4719	68.886	80.1351	70.287	55.0929	44.0093	43.2276	42.1434	46.4616	50.7206	43.6868
1239	57.2591	62.9706	64.0717	73.6072	78.2217	64.8846	44.0425	39.5363	35.5072	44.9774	47.6877	46.2035
1242.18	64.4526	55.9051	60.0512	84.0743	69.9494	61.5644	42.1175	43.014	37.7956	42.5253	44.8484	43.2351
1245.44	62.8511	62.4291	65.3521	88.4637	70.0619	70.287	38.8981	40.2685	42.8299	50.0108	54.7214	43.106
1248.61	59.2544	60.9335	62.8169	90.0394	76.646	64.1531	47.0627	43.8682	40.6178	41.4283	47.4941	40.5894
1251.78	62.116	64.3631	64.0205	77.8841	69.7805	56.3872	37.8692	41.5497	36.4989	48.0103	41.3637	44.1385
1254.95	66.2641	63.6926	62.2791	83.1739	62.4086	54.6427	44.8722	43.8682	38.2914	40.5248	46.139	43.6223
1258.14	63.2187	63.3832	65.4033	77.2088	66.179	64.1531	41.9515	44.4478	47.5973	37.1693	46.0099	44.5257
1261.34	64.0326	64.2599	64.5839	78.897	69.049	61.4519	46.764	44.6309	38.4439	37.4274	61.368	41.5573
1264.52	57.4166	67.0964	61.306	81.9921	65.5037	64.8846	43.9429	39.2312	43.0969	50.2043	49.7526	40.0731
1267.69	63.875	62.2486	60.4097	75.0703	70.0056	63.1964	43.0136	40.8786	38.5965	47.5586	44.3966	38.7825
1270.87	67.183	64.6467	66.8118	78.8407	78.8407	53.9674	40.7567	47.0714	39.55	43.3642	46.7843	43.1706
1274.04	65.1877	67.5606	62.8169	81.767	72.538	63.7029	46.3989	41.4887	40.389	44.3321	38.3308	44.2676
1277.22	55.9202	66.4002	66.7862	93.6972	68.0923	66.6292	41.852	43.8072	40.7704	43.1706	47.5586	38.5244
1280.4	60.8559	64.492	64.6351	78.9533	73.7198	63.0276	41.7192	41.1836	38.177	45.7518	43.7513	42.0736
1283.59	62.6411	63.6153	63.5083	76.8711	72.4254	58.9195	43.2459	40.299	35.0877	36.0077	47.9458	39.686
1286.77	60.8559	67.4059	65.3521	79.5723	75.8019	60.664	44.7395	42.6174	35.4691	45.3646	52.721	49.6881
1289.95	62.5624	61.2171	64.7631	85.031	74.2262	64.0968	48.158	39.8414	40.5034	39.2988	45.8808	35.1043
1293.12	60.3308	67.2769	59.1037	71.6376	69.3303	60.2138	41.6528	41.3972	38.5202	36.3949	47.4296	40.5248
1296.29	64.0588	63.8473	60.5634	78.5031	78.4468	64.4907	43.0468	39.4143	35.6598	40.2667	48.462	37.7501
1299.45	59.937	62.4549	61.2292	76.7023	73.9449	60.045	39.7278	42.648	40.2365	43.6868	44.9129	45.6872
1302.64	60.1208	60.1599	61.8694	73.157	78.9533	62.6337	44.7395	44.4478	38.1007	46.6552	50.0108	43.8804
1305.81	62.4836	59.6699	59.8976	84.9184	74.5639	59.7074	41.7192	43.3496	39.4737	41.6864	46.5261	39.6214
1308.99	54.7913	63.5379	59.9488	82.78	71.9752	66.9105	39.1636	43.4716	39.283	42.2672	43.3642	38.9761
1312.18	59.6219	66.8128	66.9398	87.9572	71.4688	64.4907	44.2416	45.2715	40.6941	39.8795	49.0428	29.9419
1315.39	61.2497	62.3775	59.6415	87.0006	75.2954	60.5515	42.6485	45.18	40.389	46.8488	47.8167	42.1381
1318.57	61.4072	64.6209	61.3572	74.9015	72.2566	64.9972	43.0136	43.6852	41.9146	51.4304	44.074	41.3637
1321.75	57.4954	62.1712	61.0243	79.8537	64.1531	64.6033	47.1955	40.8481	44.5843	47.236	53.5599	41.0411
1324.95	58.4405	65.1109	68.9117	76.5898	67.8109	67.1356	40.8895	40.2074	38.9016	46.0744	50.9787	45.171
1328.12	59.2544	59.7731	63.3291	82.5549	63.4778	59.5385	46.6645	37.7974	37.1854	36.0723	46.6552	44.8484
1331.32	59.7007	66.3744	64.2766	77.9966	63.0276	66.0664	47.1623	39.3228	35.8505	48.7847	47.5586	49.6236
1334.53	57.1804	62.9706	64.4558	80.529	74.6201	64.8846	43.5446	40.3295	37.7193	44.6548	52.6565	51.624
1337.7	61.0134	60.8819	59.0013	74.2825	70.5684	65.4474	41.5865	42.831	37.9863	41.88	43.4932	33.233
1341	56.1827	58.9737	63.3547	76.8711	60.9454	71.1311	44.5071	40.1159	39.0923	47.3005	50.9142	41.2992
1344.17	63.5337	62.6096	58.2843	77.2651	73.1007	69.1615	40.3916	45.7596	43.3257	39.2342	57.3026	39.4924
1347.34	53.5836	62.5838	61.1012	78.3905	69.2178	65.785	40.7567	39.8109	38.4058	43.3642	45.1065	44.7838
1350.54	59.1231	64.0536	66.1972	77.9966	69.1052	61.3393	41.4205	41.6412	39.9314	42.6543	54.4633	47.4296
1353.71	61.6697	57.2976	60.3841	71.919	73.0445	53.5172	45.7351	37.7059	40.923	40.9766	46.139	48.1394
1356.9	60.1733	51.1346	61.2804	80.529	63.4215	56.6123	42.7481	43.1361	43.5545	44.7838	47.5586	37.8146
1360.07	60.0158	62.2228	62.2279	85.1998	70.8497	60.4389	45.536	42.4039	40.7323	44.7838	48.7202	40.8475
1363.24	55.1588	64.0021	57.4904	73.3258	71.8627	66.5166	42.914	38.5296	42.2197	41.3637	47.6231	44.0095
1366.44	59.5694	65.8845	62.8169	80.9229	68.655	61.7333	46.764	38.6516	40.0839	46.4616	48.7202	39.4278
1369.62	55.9202	62.3259	60.7682	83.7366	74.2262	63.1401	43.1464	44.0818	43.0206	45.5582	58.077	43.8804
1372.79	57.9417	65.9103	59.5391	88.2949	70.6809	55.7681	46.5981	43.8987	39.2067	41.2992	44.2676	37.4274
1375.97	59.9632	59.2316	60.7682	81.4294	70.7372	62.5211	48.855	39.3228	42.0671	41.88	51.8821	38.7825
1379.17	59.3069	69.443	62.3047	74.0011	62.296	68.7676	38.4003	42.7395	39.283	45.0419	50.9787	38.0082
1382.35	60.9346	66.3228	58.5147	79.0658	69.1052	60.4952	44.5071	45.058	37.6812	30.9744	51.3659	34.3945
1385.51	59.5169	61.6297	62.356	73.6072	71.1311	56.3309	41.0554	43.4411	37.6812	44.3966	48.6556	36.0723
1388.68	62.0373	56.7561	58.9757	84.8621	71.9752	62.3523	41.1218	42.1293	38.6728	36.524	43.0415	45.171
1391.92	63.7438	62.3259	57.2855	79.6849	71.1874	66.9668	45.4364	43.4411	39.6644	41.6864	42.5253	48.2684
1395.1	60.3045	65.0851	62.6889	76.2521	72.5943	68.4299	43.611	40.1464	43.8215	47.5586	42.7834	41.6219
1398.27	59.6482	62.5322	60.2817	72.9319	69.8368	56.1621	42.2171	40.5125	39.6644	54.7214	46.4616	42.7834
1401.43	66.3429	61.3461	60.6146	66.9105	66.4041	64.9409	44.9718	40.7871	42.296	44.6548	45.3646	39.8795
1404.65	63.6388	62.3775	62.5864	83.9617	68.2048	66.6292	45.1709	38.8652	39.8932	40.3958	54.3988	36.9757
1407.85	60.357	70.2166	63.2522	73.2133	71.1874	65.1097	45.9011	42.0378	43.4401	42.0736	60.7227	37.9436
1411.02	60.5146	58.819	57.2599	82.2735	60.2701	67.1919	41.9184	37.7059	38.3295	41.9445	51.9467	45.0419
1414.2	60.7509	58.0712	60.6658	97.13	67.6421	62.0146	41.5865	45.18	33.791	41.2992	50.7851	42.8479
1417.38	59.5957	61.6555	60.128	81.148	71.8064	63.534	48.1248	41.6718	42.2578	50.0753	49.8817	43.5578
1420.58	63.7175	64.1826	58.5403	79.9662	72.1441	60.7766	41.2878	43.3801	45.4996	36.8466	50.4625	41.5573
1423.77	59.2807	60.4693	62.5608	81.7107	69.4429	63.1964	45.3037	42.953	46.6056	42.977	53.4954	51.0432
1426.94	55.1326	62.7643	60.2305	82.8925	68.7676	60.6078	40.2589	42.953	42.9825	45.7518	51.3014	46.139
1430.11	57.5217	61.0624	58.1306	82.9488	72.0315	61.1705	42.4162	37.1263	40.3127	39.1697	49.0428	40.6539
1433.31	61.0134	64.7499	61.7157	79.6286	64.8846	66.2915	42.8808	42.8005	44.8131	41.1056	47.365	41.1056
1436.5	58.8081	61.4492	66.402	79.2347	73.1007	64.8284	41.9847	39.1397	40.4272	40.5894	48.3975	41.6864
1439.66	57.7579	62.687	56.8246	79.0096	72.9882	59.1446	43.8433	34.3502	39.7025	37.9436	47.3005	30.7808
1442.83	61.591	56.9881	61.4341	87.0006	61.1705	52.8981	40.9559	40.2379	45.3852	40.7184	46.3325	38.0082
1446.02	57.4166	60.1599	64.4558	80.5853	72.8194	63.2527	42.4494	42.3429	43.0587	40.5894	33.4265	46.5907
1449.19	54.7125	57.5039	59.9744	79.9662	60.3264	57.6815	45.1045	40.9091	45.2708	47.365	47.5586	40.2667
1452.39	59.4119	59.8762	59.7439	83.8492	63.7029	59.8762	42.8145	42.2514	39.3593	39.8795	50.4625	43.6868
1455.59	62.2211	61.5781	60.3073	75.9145	63.0838	65.166	38.5662	39.2312	40.5416	49.1719	39.815	43.6868
1458.77	63.0874	60.8303	60.6914	88.8014	62.6337	62.7462	42.1839	37.4924	35.9649	43.106	42.2026	43.2351
1461.94	59.3332	59.8762	57.5416	77.3776	66.5729	61.058	43.777	41.8243	42.4485	39.3633	44.074	38.3954
1465.1	55.3951	60.624	63.0474	84.6933	64.0968	57.1187	44.4739	42.8005	42.7155	47.365	48.6556	40.5248
1468.3	61.2759	57.5812	56.4405	88.4074	68.5988	66.1227	44.0757	39.8109	39.016	48.8492	47.3005	38.5889
1471.47	59.0181	61.475	63.5851	75.9707	61.5082	63.9842	43.2127	42.3124	34.3249	45.7518	46.5907	44.3966
1474.67	58.7293	60.3146	60.589	84.8621	70.0056	58.5819	39.5951	46.1257	41.9146	48.7847	49.6881	49.559
1477.85	61.1972	59.6957	59.9488	74.7327	67.5295	57.0625	43.2791	44.4173	35.6598	42.2672	44.3321	46.0099
1481.06	61.6697	57.0655	59.9488	79.4035	65.3348	56.6685	40.0929	42.8615	39.7407	48.7847	49.4945	38.718
1484.23	58.9131	62.7127	61.1268	72.7068	67.8109	60.1013	40.3916	39.9329	38.8635	48.8492	44.7838	39.2988
1487.44	58.7556	55.673	56.6965	77.9966	69.8368	54.8678	38.4666	38.8347	39.1686	37.0402	49.2364	36.653
1490.6	59.4119	59.7215	61.3572	71.919	72.0315	63.534	42.5158	40.7261	41.8002	45.4937	42.7834	46.5261
1493.8	53.4261	60.5725	56.8502	88.9139	75.1266	57.0625	44.0425	44.2038	37.6812	49.7526	42.5253	43.7513
1496.97	60.0683	56.5756	61.2036	79.7974	74.2262	66.0101	40.2921	43.6852	39.55	41.9445	46.7843	40.2667
1500.17	58.8868	60.1599	58.5915	78.4468	68.8801	66.4041	44.0425	37.4314	38.3677	42.0736	42.5898	42.009
1503.43	61.1709	63.0222	61.895	81.6545	73.4384	61.2831	44.7395	45.2105	41.495	44.9774	46.7197	39.2988
1506.59	59.7532	58.1485	59.7183	94.9916	60.4389	62.7462	44.6399	42.5869	39.283	42.2026	39.815	45.2355
1509.77	58.493	59.6184	62.5608	74.0011	62.2397	57.794	39.0972	43.6547	39.1686	42.2672	41.6219	46.7197
1512.95	55.8414	59.6699	55.4417	84.8059	65.3911	61.7895	40.5576	37.2178	40.4653	46.0744	52.6565	38.2663
1516.15	58.7031	63.2543	61.4853	88.1261	72.3129	63.2527	45.7683	43.4106	42.5248	37.4919	45.5582	42.5898
1519.34	60.1733	58.8963	59.6415	80.529	71.6376	64.6033	41.9515	42.2514	37.8337	45.3001	53.4954	44.7193
1522.53	62.3261	58.5353	58.4891	83.4553	72.4817	64.0405	43.5446	43.3496	44.5843	49.6236	54.9796	46.2035
1525.73	62.5361	64.3631	55.2113	76.7586	63.0838	59.0884	40.624	42.5869	38.6728	38.0082	44.9774	41.3637
1528.91	58.1517	65.4719	59.9232	81.5419	65.166	61.058	46.4653	41.0616	38.5202	42.9125	51.1078	35.2979
1532.09	58.6243	60.2888	61.178	70.2307	60.8891	63.1964	41.1218	37.889	43.2494	44.3321	46.8488	38.4599
1535.26	60.9084	61.4234	60.1793	78.5594	67.6984	62.6337	45.2373	38.2855	40.122	40.8475	53.7535	40.783
1538.52	59.0706	64.1052	57.7465	88.5763	63.2527	62.6337	40.9227	43.9597	37.9863	42.977	40.2022	42.2026
1541.7	53.5836	59.9278	56.6197	74.6764	73.8323	61.9021	39.7942	41.4887	38.177	45.3646	51.4304	51.1078
1544.88	60.1208	57.2202	61.8438	81.3731	69.668	60.8329	41.9515	43.1361	39.7407	46.5907	51.6885	49.3009
1548.04	59.5694	57.8649	64.0973	78.1654	65.5599	63.5903	41.0886	41.4887	44.1648	38.1372	45.1065	44.2031
1551.22	60.357	59.8247	54.5455	71.1874	67.1919	61.3393	44.8722	44.2038	39.3593	43.106	46.7843	45.3646
1554.41	64.1376	52.5786	58.4891	84.6933	64.9972	57.8503	44.8722	43.2581	44.5461	40.4603	54.9796	42.7189
1557.58	46.4164	53.9453	61.4085	83.399	65.9539	64.8846	38.1679	40.482	44.508	48.0749	55.1086	48.9783
1560.76	55.6839	55.2604	57.2087	90.4333	68.3174	63.1401	41.852	41.3972	44.4317	39.6214	43.7513	39.9441
1563.92	59.1494	60.1857	63.662	77.8278	65.2223	65.4474	41.2214	39.5668	44.9275	43.7513	44.5902	37.8146
1567.09	55.1588	60.2114	63.9437	74.0574	56.2183	63.3089	41.3873	44.2953	40.2365	39.2988	50.2043	38.2018
1570.3	60.6196	60.1599	60.2561	78.6156	72.9882	62.1835	42.4162	41.0006	40.0839	47.8813	46.9133	40.3313
1573.47	56.8391	58.5611	55.2113	75.5205	68.7113	65.7288	42.9804	37.4009	34.2487	38.4599	48.462	38.718
1576.63	56.0777	57.7359	59.7951	76.2521	72.538	58.9195	44.1089	44.4173	38.1388	38.0082	44.9129	35.8142
1579.81	61.8535	61.114	57.9513	78.2217	66.5166	51.3225	40.2589	43.5631	36.1937	46.0099	41.3637	43.6868
1582.98	60.7509	65.3172	58.3355	77.6027	61.8458	64.3219	45.4364	41.9463	37.9863	38.7825	44.0095	41.1056
1586.15	66.0803	58.1743	60.8451	85.9313	75.3517	58.1317	41.0886	40.543	41.0755	44.5257	49.7526	46.7197
1589.37	54.3187	61.8618	60.0256	76.7023	69.3866	57.5689	45.005	37.3398	36.3844	41.4283	56.5283	38.2663
1592.55	52.0872	59.2058	52.9834	82.9488	72.2003	57.7378	37.305	39.1397	39.2449	43.8804	51.4949	43.0415
1595.72	58.4668	57.968	61.5621	82.5549	68.5425	54.5301	40.2257	39.5973	40.2365	42.4607	44.074	45.5582
1598.91	57.3904	56.4982	58.2074	76.8149	70.6809	63.5903	40.3584	40.8786	39.2449	41.9445	55.8185	43.2351
1602.08	64.0063	58.6127	59.8207	77.659	63.8154	67.1919	43.4783	40.9701	39.2449	46.5261	48.9783	46.9778
1605.27	52.8485	57.3491	57.4392	76.1396	74.5639	60.9454	39.0309	42.648	36.4989	41.8154	47.1069	45.8808
1608.46	56.4715	61.0108	59.6927	83.5115	65.4474	64.4344	38.3671	39.4448	40.0839	40.2667	48.5266	46.9133
1611.62	56.9178	63.8216	56.6965	82.4423	76.8149	59.0884	46.5317	42.8615	38.0244	45.4291	40.783	40.5248
1614.8	56.0252	59.3089	62.356	72.3692	62.5774	53.1795	36.2761	37.8279	42.1434	46.7197	51.0432	43.3642
1617.99	55.7364	60.5209	60.5378	73.6072	66.4041	56.7248	35.1809	38.9262	37.8719	43.6223	44.3321	43.2996
1621.16	61.0659	56.8592	57.0038	78.3343	71.6939	54.4176	42.6153	39.7193	38.5202	45.8808	48.0103	44.7838
1624.36	59.3332	58.8448	58.5403	72.3129	67.8109	58.188	43.3787	40.6955	38.5584	42.5253	44.7193	41.4928
1627.54	56.7866	57.7875	62.8169	77.04	58.5819	63.0276	43.777	37.1568	38.177	51.1078	47.365	38.9116
1630.72	51.9559	61.6297	58.2586	82.386	66.5729	60.4952	36.7076	38.0415	37.2616	43.106	49.1073	41.4928
1633.91	51.8509	55.1057	60.0256	81.9921	58.9758	59.3697	41.852	39.1397	38.2151	40.5248	43.2996	44.4612
1637.11	58.6506	59.8247	54.7247	80.0225	64.4344	63.3652	38.1016	43.1361	41.6095	47.5586	48.9783	38.5244
1640.29	56.8916	62.8932	55.7746	86.1564	60.4389	52.7856	41.4537	42.6785	33.3333	36.0723	41.0411	39.3633
1643.49	57.968	64.3889	56.1332	79.1221	64.3219	54.305	39.6947	37.8585	40.2365	47.4296	45.171	36.4595
1646.67	54.2137	53.7133	61.9718	86.3815	64.7158	60.7766	41.2878	41.5192	33.4477	40.6539	50.9787	37.4274
1649.84	56.1302	55.9567	57.4136	75.5768	68.5425	55.7681	42.2834	43.1666	39.4355	44.9129	46.5261	38.4599
1653.04	58.6243	59.18	56.4917	78.897	63.8154	59.5385	40.4248	37.6449	35.7742	44.9129	46.5907	37.6855
1656.21	55.2901	58.2001	55.9283	74.0011	68.1486	59.0884	41.4869	40.4515	42.1815	40.3958	43.8804	39.7505
1659.44	52.6122	59.9794	58.0538	85.9876	67.6421	56.3872	45.5692	45.6376	40.4272	47.5586	46.9133	44.9129
1662.62	56.524	62.3775	57.8745	82.8362	67.5858	63.928	38.9313	46.0037	35.6217	37.4274	43.8159	38.9116
1665.78	54.7913	59.0253	62.612	77.9403	67.7546	66.0101	38.6658	40.8176	38.4439	39.2342	55.7539	48.9137
1668.96	55.0538	59.1284	56.4661	78.1654	73.3258	67.6421	45.5028	39.5668	43.669	43.5578	52.3338	39.686
1672.15	51.9821	57.9422	57.516	86.3815	61.1142	58.0191	44.6399	37.3093	37.9863	42.1381	49.3655	44.5257
1675.35	59.7795	62.1454	56.4661	79.0658	64.0968	60.2701	39.5287	42.9835	39.3211	42.0736	40.1377	41.4928
1678.52	55.7627	57.7875	57.644	73.157	63.8154	57.5689	37.6701	38.4381	43.6308	40.7184	46.8488	44.5902
1681.69	57.5742	55.9567	58.7708	86.4378	69.2741	59.5385	38.7654	43.1056	36.0793	42.4607	47.8167	40.0086
1684.9	57.4954	62.0939	57.644	80.2476	71.1874	55.5993	41.8852	36.6687	40.6941	40.5894	40.783	40.6539
1688.1	59.5694	57.0397	61.6389	84.1306	61.9021	58.1317	40.9559	41.5802	38.5202	42.6543	46.3325	42.2026
1691.28	52.5597	59.8247	54.2125	85.8188	66.4603	62.4086	43.3123	38.5601	41.9527	36.8466	47.1714	43.6868
1694.46	58.388	57.5039	58.233	79.6286	65.6725	57.794	37.836	41.4277	39.9695	42.9125	50.7206	36.9757
1697.63	61.8535	60.4693	60.2305	68.0923	69.9494	59.7636	40.0597	43.2581	39.1304	42.3962	54.786	41.4283
1700.8	55.8677	58.4838	61.0499	85.9313	71.1874	66.9105	41.686	39.5668	40.4272	42.6543	50.9142	45.2355
1703.97	53.1111	58.4064	58.5403	93.6972	67.417	52.054	39.4623	37.2788	44.7368	49.2364	47.1069	37.4274
1707.16	53.5311	56.7045	63.4059	89.7017	67.5858	67.2482	39.0309	40.3295	37.1854	42.0736	41.2992	46.0099
1710.36	55.2376	57.3749	59.7951	78.7282	63.8154	56.1621	46.1998	42.0683	42.5248	42.8479	48.2039	36.7176
1713.51	58.6768	59.1284	58.9501	79.8537	68.036	53.4046	41.7192	41.3362	38.0625	37.4919	45.1065	34.8462
1716.72	54.7913	62.1712	56.799	70.7372	66.2915	49.5779	40.7899	42.0073	40.923	43.7513	52.5274	39.686
1719.89	55.0013	61.8102	55.8259	78.4468	62.0709	58.188	41.8188	41.1226	41.3043	45.8808	50.1398	38.3954
1723.06	53.5836	57.1944	58.8732	81.8796	67.1919	63.928	42.1175	37.0958	36.7277	41.8154	52.9146	41.3637
1726.27	52.9798	62.6612	55.749	75.9707	69.1052	60.8329	41.852	43.1361	36.0793	50.1398	52.721	38.9116
1729.47	56.8916	59.3347	57.5416	71.7501	72.4817	55.3742	43.3123	38.4381	39.6644	46.139	47.6231	38.1372
1732.66	61.2234	60.2372	54.6479	72.3129	69.4992	52.7293	42.7481	41.1226	33.9054	41.5573	44.5902	37.621
1735.86	52.0084	55.8277	53.8028	82.8362	64.4907	49.6905	44.6067	37.1568	38.2532	47.6231	50.2689	37.2983
1739.05	58.4143	60.392	55.5442	73.9449	72.5943	55.5993	42.4826	35.845	45.5759	38.7825	50.527	44.5257
1742.22	53.2948	56.6271	57.3367	81.148	66.9105	62.0146	44.0425	38.4686	34.5156	38.8471	48.2684	41.1701
1745.41	56.3928	60.8819	58.6428	80.4727	71.2999	64.0968	42.5821	39.3838	35.9649	42.009	41.2992	45.9454
1748.61	53.1898	61.9134	55.9539	79.2909	68.0923	55.2617	41.6528	43.6242	38.7109	44.6548	53.5599	45.7518
1751.78	59.6219	56.6271	55.4161	77.0962	59.8199	61.3956	38.7322	43.5937	40.4272	44.074	44.7838	39.4924
1754.96	55.9202	58.69	58.7196	76.1958	70.0619	60.2701	41.5865	39.9329	40.4653	51.4949	47.6877	40.4603
1758.12	55.4739	60.6498	57.4136	77.4902	61.6207	56.2183	44.9718	40.421	38.1007	41.7509	43.1706	34.459
1761.29	55.8939	56.163	59.8976	82.3298	60.9454	53.9674	41.6196	40.9091	42.4867	40.3313	47.6877	43.106
1764.48	54.765	55.1315	60.7939	79.516	66.6854	65.3348	40.1925	41.0616	43.8978	41.8154	42.3317	39.686
1767.65	52.9273	59.6699	57.7977	70.0056	64.8846	50.5346	38.002	40.3905	41.3425	40.1377	46.4616	45.1065
1770.84	51.247	56.9881	55.5186	87.7884	69.3866	55.0929	46.4985	41.9158	39.1304	40.5248	42.1381	37.8791
1774.03	54.0824	55.9567	60.7682	74.789	69.668	54.924	38.533	47.773	35.5454	32.0714	39.5569	39.686
1777.2	57.5479	57.1171	53.6492	67.5295	67.7546	57.9066	40.5908	38.8652	38.7872	44.3966	45.2355	30.9099
1780.38	52.796	54.6158	56.7734	68.3737	62.7462	58.6944	38.6326	42.7395	40.0458	43.5578	35.4915	36.0077
1783.57	54.765	55.5183	61.1524	81.7107	63.4215	63.8154	45.3701	35.845	38.5965	45.3646	44.3966	39.9441
1786.75	57.7054	55.6215	61.0755	70.7935	67.0793	54.1925	41.3541	40.5735	37.4523	44.5902	42.2026	39.5569
1789.92	56.4715	58.7674	58.7708	71.6376	62.915	59.8762	41.4205	39.9939	33.791	43.0415	50.8496	34.5236
1793.12	56.5765	58.9479	56.6709	79.1784	65.5037	62.6899	44.8722	39.9634	40.3127	45.3001	48.2684	45.5582

## Sheet: Figure 1-Fig sup 3-Panel E
Time (s)	AB-Cy5/ZB 77N0-Cy3 ATP			AB-Cy5/ZB 77N0-Cy3 amppnp
0	92.5249	90.7618	90.2973	86.4603	90.4233	83.0414
3.655	96.8588	92.9903	83.5673	91.7941	94.9856	86.6296
6.849	88.4692	92.3825	89.5541	89.668	89.7657	85.3481
10.026	91.332	95.5024	93.8068	91.4584	87.5462	79.9231
13.192	86.5209	81.9692	85.5491	94.1813	95.9721	84.1094
16.379	96.9384	90.5997	96.0363	90.787	92.2729	89.0645
19.554	81.5109	100	86.6226	86.7214	100	78.6416
22.736	89.9404	85.3323	95.0454	93.9202	90.4233	90.8586
25.932	90.0199	80.8347	87.1181	91.6822	89.3547	89.3635
29.14	80.6362	85.5754	88.8935	91.0481	92.5606	88.5519
32.339	87.5547	86.4668	88.9761	86.9825	99.7945	84.4084
35.531	88.2704	95.8671	79.1908	88.2507	88.9437	93.2507
38.746	93.7972	96.8395	84.1866	88.3253	89.8479	82.9133
41.92	88.6282	88.9384	92.9397	85.8635	89.9712	88.082
45.099	78.9264	88.9789	85.8382	84.558	96.753	87.4413
48.294	86.3221	93.3144	87.5723	87.1317	93.2182	83.4686
51.518	92.9622	97.0016	88.1503	98.1723	91.1632	87.0141
54.701	81.5109	93.0713	92.2378	86.5722	89.3958	89.2354
57.921	85.169	82.8606	87.4071	87.1317	94.9034	85.5617
61.118	78.2505	86.5073	90.1734	87.915	88.7793	83.1696
64.312	100	88.2496	100	92.1298	82.6141	81.6318
67.501	82.1869	80.389	87.1181	92.8758	94.0403	85.0491
70.67	88.7475	88.4522	87.2419	86.5722	94.328	89.2354
73.866	81.9085	91.7747	81.379	86.9079	84.2992	83.8103
77.045	82.9821	82.3339	81.0074	87.6539	82.3674	88.8509
80.23	83.1014	83.4279	88.8109	80.1194	88.2861	93.208
83.394	83.8966	77.2285	83.6499	88.1015	82.7374	92.1828
86.565	75.7058	87.6418	84.1866	87.4301	86.8886	82.5288
89.75	85.6461	89.222	93.6416	91.2719	85.4501	84.7928
92.96	83.4195	82.6985	85.673	83.439	94.739	89.748
96.147	84.493	88.6143	82.1222	90.0783	89.5602	79.7522
99.322	81.9085	84.9271	76.1767	84.7445	88.656	79.3678
102.5	80.7952	88.6548	89.3064	87.3928	83.6005	87.5694
105.693	80.1988	88.2091	75.4748	86.1246	90.9166	82.4007
108.883	85.2485	77.107	82.0809	89.4815	91.492	87.6121
112.094	76.5408	91.9773	77.8282	81.9843	87.0941	82.4861
115.266	85.0497	80.7942	82.7002	96.7922	89.9712	89.2781
118.432	82.0278	83.5089	78.2411	82.32	88.4916	89.4917
121.612	85.328	76.3371	83.4847	94.5543	92.5606	87.4413
124.821	79.2048	83.0227	87.2419	88.0642	95.9721	86.4161
128.015	82.9821	85.4133	88.2742	89.5934	88.1217	92.8663
131.203	83.2207	92.423	86.4575	90.0783	94.8623	85.9889
134.385	76.8191	78.6062	93.4352	91.8314	95.1911	79.5814
137.671	75.666	92.0178	84.8885	82.6184	90.5878	91.1149
140.87	87.3956	78.6467	83.0718	85.4159	89.2725	92.012
144.058	80.1193	88.4927	80.8836	86.5349	85.6556	92.8663
147.271	82.1471	84.846	85.095	97.2025	81.1755	78.9406
150.498	76.7793	81.6451	87.1181	83.1033	88.9848	100
153.686	75.8648	77.0259	86.9116	83.0287	93.6704	92.8236
156.873	76.4215	86.4668	87.6961	89.9664	93.1771	86.6724
160.068	83.0219	81.4425	84.6408	86.2365	93.0538	87.783
163.235	76.7396	79.2545	81.9158	83.9612	87.5462	89.9188
166.42	77.0974	75.4862	73.9884	89.8172	89.1903	84.8783
169.59	77.8926	89.141	81.7919	83.5882	89.3958	83.8531
172.789	77.4553	83.671	82.0396	86.7214	88.3272	81.5036
176.005	86.7992	78.2415	84.8472	84.4834	88.6971	92.1828
179.179	81.3917	85.3323	76.796	91.7195	95.2322	80.5639
182.348	82.3062	79.1734	78.6127	88.288	78.5039	80.5639
185.548	71.8091	77.8363	82.0396	90.1529	86.6831	78.8125
188.743	83.8966	85.2107	82.948	84.3342	87.053	88.2956
191.929	81.5507	78.9303	79.5623	92.6147	89.3958	87.2704
195.095	81.5507	82.2123	89.5954	87.4301	95.8898	82.8279
198.284	74.1551	79.7002	81.379	86.7214	90.3	88.2956
201.501	78.0915	73.5818	83.237	90.5632	81.792	84.3229
204.712	86.0835	83.4279	84.5582	88.0269	85.5323	89.748
207.895	82.8231	81.9692	82.3699	85.1175	90.7933	91.4566
211.112	79.2843	74.919	79.4798	82.8795	93.3005	89.0645
214.284	75.3082	81.4019	80.8423	91.3092	92.2729	80.7347
217.51	80.6759	80.8347	78.1585	88.8474	88.8615	84.3657
220.678	80.3579	76.6207	81.8745	86.3857	94.328	94.5323
223.848	82.8231	80.6726	79.232	86.2738	91.9441	84.3657
227.06	77.4155	80.389	80.7597	87.6166	89.478	86.7151
230.292	78.2903	76.9854	82.5764	89.0339	84.4636	92.3537
233.453	70.6561	81.3209	86.251	87.5047	90.5878	98.5476
236.632	73.1213	83.7115	78.1585	86.9452	88.4916	80.7347
239.794	75.666	79.6596	77.3741	81.4621	84.8335	89.4062
243.007	81.3917	74.0681	77.7044	84.2596	89.7246	89.3208
246.193	80.2386	74.7164	74.4426	89.9291	89.1081	84.0666
249.388	78.2505	82.1313	81.2139	90.4513	91.903	86.2879
252.559	75.1093	80.7536	81.2552	85.3786	84.5458	84.0239
255.766	79.4036	72.2042	85.5904	100	97.2051	81.3328
259.007	68.7475	77.6337	83.8563	87.0198	88.1217	79.8804
262.235	74.1153	80.47	81.7919	93.1369	91.2454	80.3076
265.442	80.4771	82.6175	88.8109	83.7374	88.3683	83.6395
268.662	73.3598	81.9692	82.1222	91.3092	86.9297	86.8432
271.82	79.4433	73.8655	86.9942	92.7639	86.3132	95.8992
275.008	82.8231	76.6207	77.3741	95.2257	91.2454	86.0743
278.21	86.163	76.7423	78.1173	87.0571	85.9022	85.9035
281.455	67.9523	71.6775	81.5855	86.5349	92.3551	90.1751
284.656	77.6541	83.9141	75.0206	86.4603	88.6149	86.3733
287.858	78.7276	69.0843	75.0619	90.8989	88.9848	80.4357
291.049	73.8767	77.269	77.787	84.9683	90.5878	89.3208
294.215	73.996	81.483	72.7911	88.0269	78.2573	90.2179
297.403	76.8588	76.175	82.7828	81.1264	86.0666	81.1619
300.621	74.2744	73.5008	70.6441	96.7922	81.9564	89.5771
303.791	75.666	78.5656	84.8885	90.6751	88.1628	93.507
306.986	73.3598	77.5527	86.0033	89.2577	90.7111	82.0162
310.164	73.6779	72.2853	90.7514	88.3999	96.1365	86.4588
313.33	73.7972	80.1864	87.7787	90.1156	94.5335	88.8082
316.515	73.2803	83.0632	77.3741	89.0712	95.9309	82.8279
319.706	74.6322	75.1621	82.0809	89.9291	93.2182	94.0196
322.894	78.9264	72.9741	84.0215	85.2667	87.9573	83.7676
326.099	70.3777	72.0827	80.3055	92.3909	91.3276	79.5814
329.356	78.1312	74.8784	73.9884	85.7143	92.1085	85.2627
332.558	68.4294	76.9044	78.6127	90.414	87.5462	80.393
335.772	72.8032	72.2447	80.6771	90.4513	83.8471	86.5015
338.972	65.9245	74.5948	80.0165	84.7445	89.3547	86.0316
342.188	71.332	76.9449	74.9381	81.0145	86.1899	89.6625
345.383	75.9046	72.812	76.7547	86.1992	80.2302	88.8936
348.583	74.6322	72.812	84.9711	82.2454	89.8479	85.0918
351.807	74.2744	77.7553	68.6623	88.3626	91.1632	86.0743
354.988	68.5885	76.6207	80.512	86.9825	84.4225	75.1815
358.191	69.2644	73.4198	82.1635	85.4905	87.3407	84.5365
361.367	76.1034	71.8395	78.5301	89.0339	94.2458	83.5968
364.548	70.1789	75.2431	81.4616	90.0783	97.4517	91.1576
367.732	77.6541	70.1783	70.5202	83.6628	90.9577	83.9385
370.922	71.9284	71.7585	84.6821	90.1902	91.903	87.5267
374.137	67.0775	75.5673	81.7506	81.8724	86.8886	87.3985
377.36	74.831	81.8476	83.1544	88.2507	93.2182	87.2704
380.552	70.9742	70.7861	78.943	89.5188	88.8204	88.2956
383.801	66.4414	70.1783	82.0396	92.3909	81.6687	81.5891
386.975	76.4612	72.4068	70.7267	89.4442	84.5458	87.6976
390.217	75.507	78.5251	79.2733	93.4353	99.7123	84.5792
393.389	72.008	72.4473	81.1313	88.3626	86.0255	86.3733
396.625	70.7356	73.0956	82.7415	80.1567	90.7111	85.0918
399.827	77.6143	68.2334	82.948	86.5722	92.3551	86.3306
403.035	76.9781	72.5689	74.4426	87.5793	88.6149	90.0043
406.22	67.1968	71.9206	77.1676	84.4834	86.4776	80.2648
409.406	62.2266	76.4587	78.365	80.1567	84.217	86.6724
412.615	76.7396	67.6661	81.8332	86.5722	90.7933	91.6275
415.791	63.7773	83.2658	80.9249	89.3696	87.0941	85.3481
418.977	70.8946	73.825	70.8918	85.6024	81.2577	75.0961
422.153	67.7932	75.7699	79.6862	92.7639	89.2314	88.7228
425.358	72.9622	67.3015	86.7052	86.5722	96.4242	86.9714
428.56	68.7475	67.5851	80.0991	86.2365	82.573	83.9812
431.767	72.4851	74.3112	73.9884	81.9097	91.7797	89.1072
434.947	71.3718	71.8801	71.1396	88.5117	84.4636	82.8706
438.133	72.0477	73.1767	77.787	85.0056	87.9984	87.5694
441.31	69.8608	70.5835	80.1817	90.4886	85.5323	89.2354
444.493	79.0855	78.282	73.8233	92.8012	82.7785	88.8936
447.709	67.4354	66.0454	80.5945	86.6468	80.6001	84.1521
450.879	75.666	73.7034	69.9009	90.6378	88.5327	84.1094
454.117	72.6441	72.4878	79.6036	86.4976	83.4361	79.6668
457.292	72.167	80.8752	86.9529	83.439	94.5335	79.0261
460.478	73.2008	74.4733	79.1495	87.169	86.3132	83.8103
463.649	75.4672	65.0729	75.3922	82.0589	89.2725	94.6604
466.846	71.5706	74.9595	68.0429	83.3644	95.6843	85.1346
470.012	71.9284	67.8687	69.8596	81.8351	91.903	87.2704
473.186	69.5427	72.9741	75.7225	80.4551	80.3124	82.956
476.387	76.3419	73.1361	78.5714	79.2988	87.6284	81.9308
479.549	73.7575	73.0551	75.4748	84.4461	93.3827	83.9812
482.723	73.002	63.4522	75.9703	80.0448	79.9836	84.3657
485.923	75.9443	74.3517	69.199	85.8262	88.4505	89.0218
489.121	64.9304	66.9773	75.2684	85.0056	88.8204	90.4742
492.308	65.7654	75.1621	71.2634	89.2577	88.5738	84.921
495.511	76.7793	69.3274	76.8786	96.8668	85.82	87.0995
498.678	73.837	69.53	79.7275	88.1761	95.4377	83.4259
501.859	70.5765	72.6094	75.2684	89.9664	76.5721	79.6241
505.049	67.3956	72.2042	75.9703	82.32	91.2454	85.4336
508.263	72.326	66.5316	81.6268	81.201	91.7386	76.7621
511.494	68.6282	71.8801	69.777	84.3715	89.478	91.0722
514.668	73.2406	64.5867	72.1718	83.1406	84.8335	79.795
517.928	65.1292	74.6353	68.91	86.423	93.6293	84.7074
521.101	74.0755	69.0438	74.7316	88.6609	83.1484	82.1871
524.268	70.5765	70.1783	71.1396	92.1298	98.9725	88.7228
527.455	75.507	64.6677	76.6309	80.9772	84.2581	89.9616
530.62	67.7535	73.2172	79.9339	87.8777	91.4098	91.1149
533.825	73.1213	71.1912	69.6532	80.7162	87.7106	90.346
537.002	66.7992	73.906	73.1627	90.414	80.7645	85.4763
540.221	67.3161	74.6759	74.0297	89.295	84.4225	85.0064
543.451	64.175	75.081	76.8786	79.5972	82.5319	82.7424
546.644	67.7535	73.6629	72.0892	83.2898	89.7657	93.208
549.857	70.338	66.9368	70.8092	84.4834	87.6695	86.3733
553.059	69.1849	65.3971	76.3006	86.1619	87.6284	86.9714
556.253	69.4235	69.4489	80.7184	83.9239	96.9174	87.8257
559.49	71.6103	72.0016	69.7358	85.7889	88.4916	91.0295
562.697	76.2624	70.2998	75.3097	90.0037	92.1085	89.2781
565.874	67.6342	67.8687	71.9653	84.1104	83.1895	88.8936
569.042	65.2087	66.2075	76.0116	76.8743	91.903	80.0513
572.245	71.7694	72.3258	71.9653	81.6113	80.6823	91.5421
575.418	63.6978	69.0843	78.9843	80.9772	85.5323	85.0064
578.634	63.499	61.6288	72.8737	86.5722	89.2314	84.6647
581.824	68.2306	77.7553	73.6168	83.2152	87.5051	81.6745
585.001	73.5984	69.3274	76.5483	84.4088	89.4369	84.2375
588.198	72.8827	67.7066	75.4335	87.3555	83.9704	79.4959
591.383	67.3161	64.7083	74.6491	87.2063	93.2594	82.5716
594.616	73.0417	65.5592	70.1486	90.3021	88.8204	85.0064
597.823	69.9404	66.5316	70.9744	80.8653	92.8483	76.9329
601	70.6561	69.3274	72.3369	84.185	83.4772	89.6625
604.194	66.839	65.5592	74.6491	80.194	91.492	80.094
607.365	63.5388	74.5543	67.0107	91.3092	84.9979	77.9581
610.552	69.0258	70.8671	63.2948	87.0571	91.6564	90.6877
613.751	69.7018	73.5008	74.36	87.9523	82.984	81.3328
616.932	66.7992	68.1524	71.3873	82.8049	89.1492	92.5673
620.11	66.7594	69.1653	67.1759	80.9026	97.0818	78.8125
623.315	70.2187	68.0713	75.3922	86.9452	85.0801	84.1521
626.499	62.0278	67.2609	69.1164	80.6043	87.7106	88.4238
629.689	65.6859	69.5705	77.9521	81.9097	83.9293	77.1465
632.886	69.4632	64.3031	77.6631	87.8031	82.984	85.22
636.053	65.7256	68.1524	72.7085	87.3182	89.9712	86.7151
639.225	69.1451	65.4376	77.7457	79.4107	84.4225	84.7501
642.491	60.4374	71.5964	68.3732	85.0429	85.4912	87.185
645.67	73.9563	66.8963	67.052	81.2383	84.7513	85.6044
648.857	66.6402	72.731	78.7779	88.1015	86.8064	88.381
652.041	67.0775	69.53	72.6259	85.7516	84.0937	81.4182
655.294	67.5944	68.0308	70.5202	87.2436	89.2314	81.5891
658.477	70.0199	63.0065	66.0198	79.3361	79.0793	83.4259
661.662	64.334	66.5721	69.2816	78.9258	85.9022	88.2956
664.878	65.328	66.8558	73.4104	83.9239	84.0937	83.9385
668.061	73.4394	71.799	73.4104	93.6591	88.9848	82.4434
671.245	65.3678	63.7763	72.0892	88.8847	85.5323	82.5288
674.441	64.0159	71.637	74.2362	82.6557	86.1077	80.5639
677.627	69.8608	77.3501	72.9562	79.9702	91.7386	85.0064
680.81	65.0497	65.8428	74.2775	84.4088	85.6145	91.8411
684.013	63.5388	66.3695	66.3088	83.2525	85.7378	85.0491
687.219	66.8787	64.9109	69.9009	87.6539	93.2594	81.7599
690.417	67.2763	68.3549	72.9975	89.3323	83.6416	87.6121
693.584	65.6064	66.2885	72.4608	77.8068	82.3674	79.2396
696.778	70.4175	71.2723	71.057	76.7997	85.82	84.5365
699.943	66.3221	65.2755	66.1024	89.6307	87.1763	85.6899
703.14	66.004	68.7196	65.6069	85.0429	82.1619	76.0359
706.321	68.5885	67.1799	77.8282	81.0518	81.1344	77.232
709.512	66.163	67.6661	73.7407	88.9593	84.9979	86.5442
712.695	64.7714	62.6013	65.6895	93.3607	91.4098	83.9385
715.876	75.1889	68.517	77.9108	83.8866	91.7797	78.0009
719.049	63.5388	70.7455	71.8827	86.2365	85.4501	68.176
722.23	68.2306	68.6791	68.5384	81.0145	93.136	81.8881
725.467	65.0497	58.9951	68.6623	86.3111	80.8467	82.7851
728.653	63.34	69.4895	65.2766	85.1548	84.8335	85.3481
731.847	67.9523	68.6791	58.7118	84.6326	79.0793	80.692
735.083	71.6103	65.4781	68.9926	79.821	83.9293	84.8783
738.3	64.3738	72.6904	65.0702	82.8795	92.1496	87.8684
741.487	65.4871	59.0762	72.9562	82.2827	82.2852	84.6647
744.657	60.4374	74.4733	80.3881	83.1406	89.3136	80.094
747.861	65.2485	68.1524	68.1255	79.5972	83.4361	86.1598
751.046	63.0219	62.034	80.2642	86.4603	82.7785	89.748
754.235	61.1531	64.3841	64.4509	81.5367	87.5873	79.5814
757.41	67.0775	69.9352	64.2857	84.2223	83.3128	77.3601
760.613	66.839	64.6272	65.896	87.7285	79.8603	89.8334
763.772	65.2485	62.2771	73.9884	85.4532	87.4229	87.6121
766.956	71.0537	67.5041	63.7077	90.8243	84.217	82.2725
770.126	59.5626	65.8428	76.1767	87.2809	86.4776	84.921
773.323	66.998	65.6807	66.6804	86.05	82.4908	92.4391
776.545	59.2445	70.7861	70.3551	79.6718	89.9712	76.9757
779.725	63.5785	73.1361	67.4649	89.1085	83.6416	84.8355
782.894	66.4016	70.9887	72.5846	83.8866	88.5738	73.3874
786.159	72.1272	62.1151	69.199	86.423	90.2178	82.9133
789.325	61.3917	65.0729	67.5475	84.9683	89.1081	74.6262
792.494	68.5089	65.8833	64.8637	78.3663	85.7378	83.2977
795.704	57.8131	63.9789	68.7861	82.1335	91.6153	74.1563
798.884	65.4473	63.9789	67.4236	82.1335	82.6963	78.8125
802.052	64.3738	66.4506	67.341	78.2171	87.053	88.2529
805.269	72.2465	61.7099	65.3592	74.3752	79.9425	75.4378
808.468	60.7555	69.8136	70.3964	84.7445	81.0522	80.5211
811.66	61.5507	65.2755	67.0107	89.7426	93.917	78.2572
814.853	63.2207	67.2204	74.4013	76.9489	79.5725	87.3131
818.05	62.8628	67.4635	64.8225	82.8049	87.4229	91.6275
821.216	68.7475	58.1037	72.7911	87.3928	80.1891	81.0337
824.46	64.7316	66.8963	66.7217	90.5632	81.5043	78.727
827.652	68.668	67.2609	68.4145	77.6949	84.5869	78.3853
830.813	62.664	69.2058	69.4467	87.1317	83.4772	86.9287
833.99	67.5547	67.2204	68.621	81.4248	85.409	79.2396
837.173	61.2326	66.0454	71.3873	79.4853	78.0518	88.0393
840.346	61.0736	66.248	74.4426	83.1406	84.7513	78.4707
843.553	64.6918	63.128	65.7308	82.6184	82.9018	79.0688
846.718	63.1014	67.5041	70.4789	86.3111	83.8882	87.8684
849.892	68.7078	63.4117	75.6813	82.4692	85.6556	80.692
853.079	64.9304	66.6126	72.7085	91.0481	83.3128	80.8202
856.249	59.0457	66.5721	71.5111	81.8724	81.1755	86.4161
859.462	64.9304	59.7245	66.9694	76.7997	91.081	73.9428
862.631	56.3817	56.4425	75.7638	86.1992	76.12	91.1576
865.826	65.6461	65.3566	76.0116	82.0216	91.2865	78.6843
869.027	71.173	63.8574	68.6623	83.7374	87.6695	82.6997
872.231	64.4533	61.953	68.5384	82.8422	74.106	86.1598
875.393	62.9821	68.6791	71.6763	81.947	84.0115	78.9406
878.628	61.3519	67.2204	71.8415	77.6576	77.1476	77.8727
881.813	65.0895	57.9822	63.5425	83.5882	82.203	82.2298
884.992	59.8807	61.5883	69.9009	84.4088	78.0518	82.6143
888.159	65.6859	64.222	67.5062	76.0164	82.7374	79.9231
891.349	67.0378	64.8298	69.0339	82.8795	89.5602	83.3832
894.533	64.3738	64.7893	77.1263	83.7747	80.7645	83.5968
897.759	65.8449	63.7358	67.6713	82.3573	80.2713	84.0239
900.934	61.5507	60.5754	76.2593	79.4853	84.628	85.0491
904.119	63.0219	66.9368	71.3873	86.796	77.5586	86.9287
907.304	59.3241	64.1005	65.0289	79.2988	77.0654	84.1948
910.465	65.0497	63.4522	60.6524	83.9239	81.5043	78.8125
913.659	67.7137	63.5332	57.9686	83.5136	84.3403	79.7522
916.845	61.8688	64.7488	67.4236	78.2544	88.9437	83.2977
920.028	58.0119	61.2237	73.493	82.5065	86.1899	85.1346
923.204	65.4473	64.4246	72.4195	85.6397	80.3535	91.5421
926.384	66.6799	70.6645	75.1445	87.1317	85.8611	81.4182
929.554	66.4016	59.3598	65.1941	80.4178	81.5043	83.3832
932.796	62.8628	65.8023	70.4377	82.32	81.5454	84.5365
935.97	66.4811	58.59	63.0884	89.8545	85.3268	82.1444
939.139	63.499	69.0032	66.9694	82.8422	87.6695	81.2473
942.338	62.1074	65.5592	67.0933	80.0821	75.4213	81.6745
945.546	65.8449	63.6953	75.4748	77.9933	79.2026	76.6339
948.717	56.0636	63.7358	72.5021	83.1033	81.9153	82.0589
951.946	64.2545	64.222	68.0842	86.1992	85.5323	81.29
955.136	60.9543	60.6159	72.8737	82.7676	85.7378	88.4238
958.315	64.9702	59.3193	67.1759	78.1798	89.8479	84.8355
961.535	61.0338	64.6677	70.8092	89.7799	86.1899	84.622
964.702	63.7773	66.5721	68.332	79.7464	83.6416	86.5869
967.875	65.3678	61.2237	71.3873	84.1104	80.5179	79.4532
971.091	58.7674	64.2626	68.3732	77.956	80.6823	82.358
974.298	66.2823	60.9806	63.5838	84.5953	89.067	74.4554
977.486	62.6243	67.342	61.0652	81.4248	80.1069	83.9812
980.646	62.9423	61.1426	67.6713	84.4088	83.5594	85.6472
983.827	66.0835	61.0616	65.2353	79.4107	90.7933	89.5771
986.997	66.839	63.9789	68.8274	80.9026	84.3814	80.692
990.2	59.2445	68.1118	63.1709	82.0216	88.4094	81.7172
993.386	61.1928	58.5089	74.3187	75.2331	85.5323	86.7151
996.62	59.0855	73.2577	62.9232	82.8795	85.1212	85.0918
999.796	65.4473	65.7618	68.5384	81.0891	86.6831	79.9658
1002.98	62.3459	62.2366	68.0429	80.9026	84.9157	88.0393
1006.14	67.2366	64.4246	70.1899	80.9772	82.2441	83.1269
1009.36	67.1968	58.4279	72.5434	81.4994	84.1759	82.0589
1012.54	57.9324	64.9919	70.7267	79.5226	76.3666	77.3174
1015.72	57.3757	63.9384	71.3873	84.4461	79.367	77.232
1018.9	62.8628	61.7504	64.327	79.5599	85.4501	81.29
1022.12	60.8748	61.4668	70.1899	81.7605	85.7378	89.0645
1025.3	58.9662	59.846	73.1627	81.7232	78.956	84.1094
1028.47	58.33	65.6807	69.488	78.0679	84.8746	75.865
1031.69	63.1809	67.7877	73.0388	86.4603	80.6823	89.8334
1034.88	60	66.8963	61.7671	79.075	85.2446	83.1269
1038.06	61.829	63.3712	59.1247	87.3182	85.3268	76.2495
1041.27	61.9881	64.7488	64.5334	79.0377	93.1771	80.7347
1044.44	62.2664	63.6953	70.4377	82.2081	80.0658	70.5681
1047.63	57.2565	61.9125	63.749	76.5759	85.3679	83.554
1050.81	67.0378	63.0875	68.0842	84.185	81.0933	75.0961
1054	58.4095	65.154	65.6069	76.5759	86.1488	81.9308
1057.2	58.5686	63.2496	68.2494	83.066	86.8886	83.2123
1060.38	63.4592	55.5511	67.1346	81.3875	86.1488	80.6066
1063.56	58.4891	60.8995	66.0198	88.3999	81.4221	86.0743
1066.73	65.0099	62.1556	68.1668	84.0731	89.1081	80.2648
1069.92	59.9602	63.0065	61.8497	76.9489	83.2306	82.5716
1073.1	62.7435	64.222	64.5334	86.2365	86.8475	74.8825
1076.27	54.672	58.4279	68.7448	82.7303	84.8335	80.0085
1079.46	59.7217	61.9125	58.877	77.7695	88.4916	79.8377
1082.67	66.3221	63.4522	63.6251	86.423	79.737	84.1521
1085.87	62.0676	63.3712	64.905	83.9985	83.3539	83.8103
1089.1	66.0835	65.5997	69.1577	84.1477	89.3547	74.4981
1092.29	61.7893	60.1702	63.2948	81.9843	79.2437	84.8355
1095.47	61.0338	64.9109	66.5566	80.4551	75.4624	80.2221
1098.65	61.8688	64.4246	67.4649	82.2081	84.8746	84.2802
1101.84	61.7097	63.2091	62.8819	84.1104	76.2022	75.9504
1105	58.0915	61.3857	66.9694	80.9399	83.395	85.5617
1108.2	70.5765	68.9222	68.0429	88.7355	83.5594	80.3076
1111.38	57.4553	58.9141	73.782	81.0145	83.4772	85.6472
1114.6	60.159	61.9935	65.1115	78.5528	83.6416	80.991
1117.78	59.4433	63.4927	62.6755	84.6326	81.7098	80.4357
1121	63.3797	61.9935	65.8547	81.5367	91.4509	80.2648
1124.26	64.4533	63.4927	71.635	88.3253	78.7916	83.5113
1127.44	64.7316	62.034	61.3543	83.2898	75.3802	79.1115
1130.62	56.1431	57.1718	72.9975	82.1335	81.5043	81.6318
1133.81	59.5626	57.6985	69.3229	80.567	88.0395	84.2375
1137	61.8688	68.8817	65.9372	79.5226	81.792	76.1213
1140.2	60.9543	64.5057	62.18	81.4248	87.464	74.0282
1143.38	70.2187	66.1669	68.1668	73.1816	83.4361	74.7117
1146.59	59.6421	55.0648	66.6804	82.8795	82.8607	82.6997
1149.84	65.0895	57.8201	58.2576	83.8866	76.7365	83.2977
1153.04	61.1133	61.5478	68.5797	86.6468	81.0111	85.818
1156.22	62.7435	61.0616	67.9191	75.6061	79.4492	76.164
1159.4	57.8529	67.2609	61.2304	79.5226	87.4229	82.2298
1162.58	64.2147	65.235	63.9554	81.5367	84.7513	80.094
1165.78	60.2386	62.3582	65.0702	82.7303	82.573	76.8475
1168.94	62.7435	64.1815	67.7126	80.9026	89.1081	79.7522
1172.17	60.2386	63.9789	60.6936	79.8956	88.656	86.2452
1175.34	65.1292	58.1037	58.877	84.2969	79.2848	84.1094
1178.52	65.6064	62.1961	62.469	78.1052	83.8882	85.6899
1181.69	62.0278	59.9271	63.0471	87.6539	80.148	83.2123
1184.87	59.7614	65.2755	57.3493	76.2029	80.6001	72.8321
1188.06	61.4314	64.222	67.4649	83.7747	82.4908	84.4511
1191.25	55.507	64.8298	64.8225	83.5136	77.7641	80.6493
1194.43	59.4831	66.8963	70.7267	81.2383	79.8192	81.7172
1197.6	67.1968	59.9271	62.8819	79.5972	78.2984	82.5716
1200.79	64.2545	59.8055	71.346	77.5084	83.0662	83.8531
1203.99	60.3976	66.329	66.2675	77.6203	81.2988	80.393
1207.17	58.4891	61.9125	68.0017	78.0306	82.1208	78.2144
1210.38	60.4374	63.6548	67.9191	76.9862	81.6276	77.7018
1213.57	59.2445	59.4408	68.3732	79.4107	86.231	79.3678
1216.75	63.1412	56.9692	60.033	82.2827	83.9704	78.9833
1219.96	64.6521	62.8849	64.2031	82.9541	72.0921	82.4434
1223.14	61.67	66.0049	62.1387	84.9683	84.3814	77.6164
1226.31	56.3817	61.3047	65.2766	82.8422	90.9577	71.4225
1229.5	60.1988	62.5203	64.038	81.8724	83.0662	81.2473
1232.68	68.3897	60.7374	66.3501	85.304	77.0242	79.2396
1235.86	59.4036	63.9789	61.4368	85.4905	86.642	77.1465
1239.02	61.6302	65.5997	63.9554	82.2827	89.1492	82.2725
1242.21	54.0755	61.3857	69.3642	84.2969	71.5166	71.2943
1245.43	61.0736	60.1702	65.3592	81.9097	87.6284	86.4588
1248.63	55.2684	55.0648	63.2948	86.1246	89.5191	75.267
1251.82	58.5686	56.2399	70.9331	81.0145	76.9831	76.3349
1254.99	59.841	66.0454	58.3402	82.0216	80.8467	86.4588
1258.17	64.4533	56.9287	64.616	78.5155	84.7102	85.2627
1261.36	59.165	66.6126	61.8084	79.4853	84.628	76.6766
1264.56	63.0616	64.3841	65.2353	76.1656	89.3547	79.6668
1267.77	65.5666	65.235	69.8183	83.5509	82.6552	77.1892
1270.97	60.0398	63.5332	69.4467	79.2988	73.7361	74.1991
1274.13	60.6759	64.6272	70.0661	76.3894	80.6412	76.6339
1277.34	59.3638	58.4684	68.2494	89.2204	82.6963	86.5015
1280.55	60.6362	61.9935	65.0289	73.2562	84.3403	86.5869
1283.77	56.8191	63.128	68.6623	79.2988	86.2721	83.4259
1287	60.835	60.2512	55.7803	80.4178	86.7653	83.4686
1290.18	55.8648	67.8282	70.8092	78.6274	80.3124	78.3426
1293.37	60.5567	58.2658	64.3683	76.464	79.5314	87.5267
1296.55	60.4771	62.5203	65.7308	85.1921	80.8878	70.6963
1299.73	59.0457	65.8428	62.0974	82.9541	81.4632	82.2725
1303	62.8628	62.2771	62.9645	80.0821	77.1887	82.4007
1306.17	62.4254	57.6985	62.8819	81.8351	84.1759	84.0666
1309.38	62.505	63.4522	66.6804	82.8049	76.4077	73.8146
1312.61	58.9662	59.846	69.2816	76.0537	83.1484	73.8146
1315.78	59.2048	55.5511	71.4286	77.7322	82.2441	80.5211
1318.97	56.4215	63.2901	65.4831	83.7001	79.5725	86.9287
1322.16	57.336	58.9546	69.6119	78.9258	82.0797	79.0261
1325.38	55.0298	63.2901	58.877	77.9187	78.6683	78.0436
1328.68	60.7555	62.0746	63.7077	77.1727	79.1615	85.519
1331.92	52.8429	63.3712	67.2585	74.0022	82.5319	82.956
1335.1	54.9901	64.06	65.5656	79.9702	81.0522	77.1038
1338.27	56.3419	59.9676	59.4137	85.4905	85.1212	79.9231
1341.48	56.4612	58.1442	68.2081	77.21	84.7102	83.9812
1344.66	59.9205	59.0357	62.6342	81.8724	78.0929	80.8202
1347.84	61.7893	64.3436	68.1255	84.558	84.9568	77.5737
1351.07	60.9543	58.0227	67.2998	79.1496	80.8467	74.6262
1354.28	62.5845	64.9109	66.9694	81.6113	89.7246	83.4686
1357.46	59.8012	59.8055	60.033	79.1123	83.1484	86.2025
1360.67	63.1809	66.329	69.2816	81.4621	76.8187	75.9504
1363.85	64.6521	54.8622	65.1528	77.7322	73.284	74.1563
1367.04	51.2127	58.671	67.052	76.9862	79.5725	77.4455
1370.23	59.1252	65.8833	62.7581	82.9168	81.2577	82.1871
1373.41	63.1412	63.128	68.5797	80.7535	85.7378	78.4707
1376.61	62.1074	62.034	64.5334	79.3734	83.7238	79.8804
1379.79	56.3419	65.316	63.6664	77.5084	80.0658	83.6395
1382.99	59.9205	70.9076	59.166	83.5509	83.4772	88.4238
1386.19	54.9105	60.5348	65.1115	80.4178	83.0251	77.3174
1389.37	61.2724	63.128	66.0198	76.4267	83.8882	81.3328
1392.56	54.9901	58.0227	65.3179	81.7232	77.1476	84.7074
1395.74	63.6183	61.9935	65.0702	75.6807	80.0658	67.7488
1398.92	60.0795	62.8444	72.3782	78.4782	82.6141	84.9637
1402.13	68.7475	63.5332	59.0421	78.6647	73.0785	79.2396
1405.32	63.8569	68.517	59.455	80.5297	75.5857	76.6766
1408.49	61.9085	64.6677	66.9694	80.8653	73.4073	75.7369
1411.68	58.9264	64.1815	63.1296	79.2615	81.1755	83.1696
1414.88	63.0219	63.4117	67.8365	74.3752	76.7365	80.9483
1418.07	62.3459	57.0502	58.2164	76.837	85.4912	80.1794
1421.28	53.996	61.5478	59.744	75.345	81.0933	72.5758
1424.5	62.5845	58.8331	59.9505	80.6043	85.5323	79.1969
1427.7	55.3479	68.7601	65.3179	82.6557	70.9001	76.8048
1430.89	59.4036	62.4392	66.5153	86.3111	84.7513	85.9035
1434.08	63.6183	65.1135	68.8687	84.8937	90.4644	78.8979
1437.31	59.6819	58.4684	63.46	75.2331	68.5573	77.531
1440.52	58.2903	71.2723	65.2353	76.837	76.2844	70.141
1443.69	62.9423	65.0729	57.8448	77.4711	80.3124	76.0359
1446.87	57.9324	55.5511	65.6069	83.6255	81.6687	70.6536
1450.06	63.1809	61.6694	62.3452	78.2544	87.4229	79.9658
1453.27	64.0954	62.8039	60.1982	75.7553	82.2441	75.267
1456.44	58.2107	59.2382	63.0058	89.295	81.7098	75.0961
1459.6	59.4831	64.9514	58.4641	81.0891	80.3535	75.2243
1462.79	60.7952	64.3841	62.0149	77.4711	80.3535	78.7698
1465.98	54.2744	63.3712	66.7217	89.4442	81.5043	83.255
1469.17	66.3618	58.59	64.2857	80.0821	84.9979	76.463
1472.35	59.2048	55.9562	63.8728	75.7926	79.2026	77.1038
1475.54	60.1988	58.9951	66.5566	81.1264	80.3946	80.9483
1478.71	58.2107	63.4117	64.038	78.4036	81.2166	74.7544
1481.88	59.4831	67.2609	66.474	78.0306	78.2984	82.6143
1485.04	56.1034	62.5203	69.4467	74.3752	72.9552	78.4707
1488.21	58.6083	64.2626	70.1486	81.947	71.9277	83.4259
1491.42	56.6203	61.4263	65.4005	78.9258	81.9153	77.6591
1494.63	57.2565	64.222	65.3179	81.1637	73.9005	79.3251
1497.83	56.6203	53.4846	66.763	81.3129	78.4217	73.4302
1501.04	56.6998	60.2512	67.9191	82.1335	76.9831	75.1815
1504.21	62.664	59.3193	68.0842	70.3469	73.9827	80.2221
1507.39	60.994	62.7229	64.4509	71.2048	84.0937	75.7796
1510.66	64.493	62.2771	62.2626	81.5367	79.9014	76.7621
1513.85	58.5686	58.2253	61.2717	75.0839	86.0666	73.302
1517.04	53.8767	54.6596	64.7812	78.1798	75.3802	78.0009
1520.23	60.7157	61.1426	62.2626	77.0235	78.4628	72.5331
1523.42	52.4453	63.5737	61.0652	78.7393	84.628	79.4105
1526.61	53.3201	55.0243	57.6383	79.1123	86.1899	79.8804
1529.81	56.8588	60.8995	64.5747	81.1637	79.8192	79.1115
1533.02	57.6938	60.0486	60.5285	79.9329	81.8742	76.0786
1536.23	54.7515	58.2658	65.8134	76.3521	79.6958	76.7621
1539.42	60.4374	66.7342	67.0107	78.9258	86.0666	74.8825
1542.59	58.5288	59.9271	65.0289	72.9206	79.737	76.9757
1545.76	53.3201	56.6045	60.9414	80.0448	80.6001	77.1038
1548.94	63.1412	53.9303	68.5797	75.0466	79.737	78.0436
1552.18	59.0855	56.8476	66.7217	73.7411	79.2848	75.6514
1555.39	57.2962	52.269	66.3914	81.9843	87.2996	79.9658
1558.59	56.3022	54.9838	66.3501	79.9329	81.5865	79.4532
1561.76	57.9722	60.6159	59.5376	81.574	84.7513	79.8804
1564.96	62.9821	59.3193	56.73	76.3148	75.5857	82.9987
1568.15	63.5388	62.0746	59.9917	80.5297	86.231	73.601
1571.37	63.4195	61.9125	61.8084	74.6736	74.8459	79.0261
1574.56	66.998	62.6013	60.3633	79.3361	82.0797	74.6689
1577.74	58.4493	61.1831	64.8637	79.3361	80.1069	76.8902
1580.99	61.9881	60.2917	68.8687	76.5759	81.2166	78.3426
1584.17	52.8827	61.6694	66.0198	74.0022	82.1208	71.1235
1587.36	59.5229	61.2642	66.4327	71.727	72.7086	67.7488
1590.53	60.6759	61.7099	58.6292	78.6647	78.8327	80.2648
1593.71	63.9761	56.6045	63.8315	81.3502	84.2992	82.2725
1596.89	63.8171	61.6288	66.8456	75.0839	76.7776	74.5835
1600.07	56.9384	64.6677	57.3906	73.1443	79.4081	75.7796
1603.28	58.4095	53.5656	60.8175	76.4267	74.9281	81.9308
1606.46	59.2445	63.5737	60.8588	79.3361	83.3128	83.2123
1609.63	59.006	57.0908	62.2213	70.235	77.9696	76.5485
1612.81	61.1531	55.8752	62.7581	83.3644	77.2709	74.8825
1616.02	55.3479	59.9271	62.7581	72.3238	78.9149	80.8202
1619.21	56.6998	54.8217	62.0974	84.558	76.942	79.0688
1622.38	58.6083	58.9546	64.2857	78.2171	78.956	68.6459
1625.56	56.9384	59.0762	65.2353	74.0768	75.3391	73.0884
1628.72	54.7515	58.4279	58.6292	75.2704	73.7361	74.0282
1631.9	52.0875	57.0097	64.038	76.091	85.8611	74.0282
1635.11	47.5944	62.034	61.313	71.6151	70.5302	81.3328
1638.31	62.2266	60.859	63.3361	72.0627	77.1476	77.7446
1641.51	62.4254	58.9546	66.5979	76.2775	72.9141	67.2362
1644.69	54.5924	63.2901	71.4286	74.6363	78.3395	80.6493
1647.89	59.2048	60.94	62.0149	80.6416	74.8459	76.9757
1651.07	59.2048	62.6418	63.5838	73.8157	74.9692	78.5135
1654.27	52.326	59.6434	59.9092	74.0768	77.2298	81.1192
1657.45	61.8688	58.6305	65.4005	77.8068	84.217	73.2166
1660.63	60.7555	59.6029	61.5607	76.6878	73.5306	75.267
1663.82	55.0298	60.7374	60.9001	73.1816	89.1903	75.1815
1667.03	57.0577	59.4408	60.033	78.4409	78.0107	76.7621
1670.21	64.9304	53.4441	63.8315	79.6345	82.203	71.7215
1673.38	55.0298	58.4279	59.744	79.1123	78.6272	79.3251
1676.57	60.8748	60.2512	60.6936	84.8937	72.873	72.8321
1679.76	56.1829	58.3063	60.7762	74.4125	84.4636	71.9778
1682.97	65.6461	62.3987	53.3031	79.2242	77.1476	74.3272
1686.16	59.6819	56.2399	64.2031	83.3644	78.4628	68.0906
1689.42	63.6978	53.6467	62.1387	74.1887	77.1065	71.2089
1692.63	62.505	60.8995	73.8646	78.2544	78.6683	82.6997
1695.83	54.831	54.0113	62.8406	78.2544	79.0793	73.1311
1699.02	57.0179	56.6451	65.5244	77.9187	71.6811	77.6164
1702.21	63.9364	53.8493	67.2585	88.549	78.9971	79.5387
1705.41	65.0497	57.7796	65.5244	77.4711	72.6264	84.622
1708.62	53.3598	65.7618	53.5508	80.7907	80.7645	73.3874
1711.84	52.326	61.0211	59.3724	76.2775	79.0382	77.3601
1715	59.7217	56.3209	64.2857	83.8493	79.0382	77.9581
1718.16	63.0219	55.7536	62.7581	78.2917	83.2717	73.8573
1721.35	57.7336	58.3063	69.1577	75.6061	79.0382	77.0184
1724.56	62.3857	59.0357	58.877	75.6434	78.8327	80.6066
1727.76	58.171	64.1815	59.744	78.8139	83.395	73.5583
1730.96	59.4831	59.1572	56.9777	79.8956	83.7238	77.3601
1734.13	61.5109	59.7245	59.0421	77.1354	77.1476	79.1542
1737.31	59.4433	60.0891	62.5103	79.5599	78.7916	78.6416
1740.49	59.2843	59.1572	61.2717	77.956	82.6963	72.9176
1743.67	60.2386	55.6321	71.6763	81.3502	85.3679	70.7817
1746.83	54.4732	63.3306	65.4005	78.1052	77.312	62.2811
1750	59.7217	56.4019	60.1569	80.1567	78.5039	81.8881
1753.19	56.501	49.3922	62.2626	78.8139	80.8878	76.7194
1756.38	53.6382	57.4554	61.8084	80.4924	79.367	73.8146
1759.55	56.5805	65.4376	68.332	74.0395	79.4903	84.5792
1762.72	62.664	56.9692	62.5516	72.2492	76.6132	81.8454
1765.91	54.1153	63.2901	59.6614	73.5173	75.1747	86.7151
1769.09	52.9622	62.5203	61.5194	75.0466	74.3527	69.2866
1772.29	58.8072	58.6305	58.4228	73.1443	85.2035	78.2999
1775.45	64.0954	60.4943	62.469	79.9702	82.9429	69.7138
1778.63	56.8191	62.7634	62.9232	77.0235	81.7098	70.6536
1781.84	65.169	56.6451	60.1982	74.0022	83.6416	85.0491
1785.04	61.6302	60.778	67.2998	76.3521	77.1476	72.2768
1788.28	56.6998	59.4003	70.6441	82.8795	73.6128	75.865
1791.47	53.2406	52.8768	61.4781	79.7091	77.5175	72.2768
1794.98	66.2028	53.7277	61.1478	75.6061	77.8052	78.2999
1798.14	55.0696	56.6045	61.8084	83.5882	80.1069	72.1914

## Sheet: Figure 1-Fig sup 3-Panel F
Time (s)	ZB/AB-Cy5 77N0-Cy3 amp-pnp						ZB/AB-Cy5 77N0-Cy3 atp
0	99.8201	109.236	112.014	84.6853	90	89.0018	98.3278	97.1856	93.5736
3.669	99.0917	111.097	101.034	84.0647	93.3723	90.8094	95.3132	98.4365	92.6251	91.8672	92.517	100
6.834	92.8058	104.191	105.917	90.5126	95.6115	88.5701	90.0141	95.4657	100	90.0889	86.787	95.6646
10.005	101.466	112.959	101.034	95.4227	96.259	92.8597	91.1682	95.2423	93.3839	93.6977	90.6855	94.9117
13.165	99.3615	109.047	113.255	89.5144	93.723	88.786	100	94.6393	95.8738	91.7364	92.4385	90.8619
16.337	99.8741	111.124	102.356	90.3507	94.1007	97.9586	91.7805	89.9263	96.5615	91.8672	92.9618	87.2274
19.516	98.2284	105.594	100.468	84.6043	96.3399	94.7482	94.8422	99.6203	93.1231	99.8169	90.5808	93.3541
22.688	95.9892	108.426	108.75	89.5414	86.8165	89.2176	89.7786	96.6719	95.2336	96.3912	91.9676	100
25.864	102.437	111.502	97.6619	91.5917	98.0935	90.9442	92.9816	95.4434	93.0282	96.4697	89.0372	89.9792
29.026	102.437	100.549	100.36	82.6888	92.1043	88.1655	95.1248	92.3386	91.7003	87.84	81.7111	92.3676
32.209	97.6888	104.245	104.299	85.5755	91.3759	88.8129	96.0904	84.4315	92.7437	94.5345	84.9294	95.5348
35.374	96.0432	120	98.768	84.1727	85.5755	94.0468	97.9039	89.6136	94.6882	94.6914	90.3977	90.2129
38.55	102.167	107.131	109.991	88.1385	96.3939	93.777	92.7932	97.2973	95.8738	92.181	91.0256	88.2399
41.735	99.3615	112.041	108.345	78.4263	84.7392	86.0342	92.9816	91.1771	91.2734	96.182	87.8859	93.1724
44.894	95.8543	105.944	105.621	89.1906	92.3471	87.7878	88.0593	88.0054	91.6528	87.8923	92.831	93.3022
48.057	93.9388	108.534	100.063	83.2014	96.3669	89.8651	97.4564	94.4829	94.8779	88.4676	95.0549	92.4714
51.265	100.441	108.049	111.556	87.6799	87.9766	89.9191	94.536	94.8403	89.9692	91.501	91.9152	90.3946
54.438	99.3345	105.162	94.8831	83.4712	89.8112	86.3849	92.4635	94.6839	88.8546	92.2333	86.3684	91.6407
57.622	94.8022	105.216	101.034	89.946	100.683	94.1547	97.951	99.6873	94.2139	96.0513	87.0225	89.46
60.789	94.6403	102.329	110.261	84.7932	92.1853	89.8381	95.1484	91.4675	93.1942	92.4948	87.101	95.3011
63.958	99.0647	102.761	99.8471	83.4442	88.0036	85.4406	93.5233	91.5122	89.0681	91.6056	90.4239	89.9533
67.122	94.3435	104.272	100.899	90.7554	84.9011	88.705	91.5685	87.6927	93.7159	92.181	85.5311	94.2887
70.295	98.9029	107.32	102.68	80.9353	101.52	90.5935	95.902	90.507	88.3567	88.7814	89.4296	89.9792
73.462	97.3921	105.135	104.514	86.0072	92.3741	89.5414	93.1465	88.9658	89.3052	97.3849	87.9906	84.9948
76.637	98.5252	106.322	107.32	83.1745	96.1781	87.7338	93.4527	94.6616	95.3521	94.6653	91.8367	98.2606
79.801	105.054	100.791	99.8471	89.4065	93.3453	89.7032	93.9237	98.9279	85.6533	97.6987	91.6797	97.7414
82.985	94.2086	107.887	105.513	80.3147	97.473	84.8471	94.277	90.306	92.7674	92.4686	93.5636	79.1537
86.151	99.6313	108.022	101.223	87.3291	96.1781	89.973	94.536	86.7769	86.1513	93.9854	92.7263	85.9553
89.319	98.3633	101.358	103.381	82.2302	90.1349	92.0234	93.0287	92.562	95.447	92.5994	100	87.1495
92.506	93.4802	107.32	101.763	86.4119	91.8615	93.723	97.4329	91.4228	92.0323	92.2594	93.9822	90.5244
95.69	89.7302	103.327	100.252	86.277	89.8921	100.252	95.4074	100	89.732	91.1611	91.3134	92.108
98.862	93.4263	102.275	102.059	84.9011	92.7518	91.214	96.8205	90.7081	98.9566	88.886	91.1826	86.2669
102.019	98.6601	110.18	100.953	81.7176	90.1888	81.7176	92.9581	89.7699	94.9964	92.3379	87.4673	85.3063
105.189	98.6331	110.962	101.844	77.8058	95.6924	88.3813	90.0848	89.5019	90.894	93.8285	91.1041	85.1246
108.361	105.782	99.6853	105.108	85.9802	91.8345	90.4047	91.1682	88.1841	92.4591	87.3954	94.4793	84.5535
111.534	98.9838	113.39	105.836	88.2734	94.1277	90.2428	96.7028	94.7733	95.945	89.2782	96.4417	85.6698
114.696	100.818	103.273	98.0665	89.0827	94.9371	93.723	91.4037	85.6824	91.2497	92.1287	96.2062	89.1485
117.863	100.603	104.353	105.243	82.9317	89.8112	89.6493	96.4908	89.7029	92.5065	92.6255	97.0696	90.7321
121.055	96.205	104.326	102.41	83.3363	100.737	89.5683	87.6825	86.7322	87.4318	89.749	94.6625	88.9148
124.228	104.164	102.032	103.381	76.1061	91.7536	89.3525	96.2082	95.9348	84.0171	91.0042	94.9503	88.0322
127.4	98.2554	102.275	102.059	83.2824	95.6924	91.0522	89.1898	87.6033	87.6452	87.16	93.7729	88.785
130.587	96.6367	99.6583	104.083	88.9748	90.2158	93.6421	90.4852	86.6875	92.2931	98.9278	96.0492	88.0841
133.759	88.9209	104.218	106.538	83.4712	94.0468	90.1349	88.6952	88.7425	87.3133	91.0565	95.7614	91.4071
136.945	102.815	102.356	111.691	89.6493	88.9478	88.5701	88.9779	94.9743	93.2891	84.4404	99.2674	88.0841
140.103	94.2356	103.678	103.84	82.6079	90.5126	92.0504	92.9345	87.5363	83.0685	97.045	94.2177	88.785
143.275	88.3543	104.353	105.324	85.8993	95.7194	88.9209	92.6755	90.2613	83.7088	89.2521	82.2344	89.0447
146.445	99.9011	101.196	97.0683	86.5198	95.4766	93.5072	90.2732	89.971	86.2936	91.8933	96.9911	85.4361
149.625	100.198	107.401	97.5809	88.3004	94.2356	90.0809	85.7748	83.0914	90.5857	96.5481	88.8278	82.6324
152.785	91.5378	104.676	104.622	87.6799	89.7032	85.7374	91.6863	96.4262	86.175	100	91.7059	95.405
155.971	97.0144	100.252	95.1259	83.9299	92.9676	96.6906	90.9562	87.3799	86.1513	90.7688	92.1507	85.0987
159.143	91.6187	104.838	95.3147	77.6439	92.4011	99.6583	89.1898	90.7081	94.0716	88.3891	91.6274	89.7715
162.316	89.6223	100.144	102.977	82.7158	90.9712	89.4335	85.9397	89.5912	91.8188	84.0481	93.4066	84.4496
165.477	94.5054	103.3	92.9137	80.5576	88.786	86.8705	91.2153	88.7871	77.6618	96.3912	93.9822	84.0083
168.645	98.0665	102.923	103.031	83.9838	94.8291	90.8363	91.3095	91.8919	88.5464	89.5659	90.6593	83.4891
171.813	95.6924	102.626	102.869	85.8993	101.763	92.0504	83.1371	89.2562	85.2265	90.0628	93.8252	84.4237
174.997	97.1493	109.721	95.9892	81.0162	93.5881	89.0827	93.3349	84.4539	87.9772	99.8692	88.8278	83.4631
178.172	93.696	102.302	96.9065	83.5791	94.6673	84.1187	85.398	84.5879	92.0323	85.8002	87.6504	94.2108
181.343	92.9676	106.052	98.4712	71.5468	94.8022	90.8633	88.4833	78.155	95.1862	96.8619	89.9529	87.4611
184.499	88.4353	106.7	97.3381	87.6799	91.9155	89.3525	91.9454	88.2511	89.9692	86.2709	96.7295	83.3593
187.669	95.4227	102.707	98.4442	88.6241	90.2158	82.0683	88.6952	87.2013	89.3526	89.6967	93.8252	89.9273
190.856	98.0396	100.495	96.6906	81.7986	92.2392	87.7878	88.7188	86.0398	84.3965	94.3515	85.8713	81.5421
194.025	97.3112	104.865	97.6888	85.6295	95.2608	91.7266	92.8639	85.593	85.179	89.3567	91.4443	89.5898
197.182	94.7212	108.804	97.527	84.1187	95.045	93.2914	84.8563	84.1635	91.2971	89.8536	90.293	85.6698
200.354	95.1529	103.624	101.574	83.0126	96.5288	89.6493	82.3834	88.4521	85.9379	93.2008	90.5024	86.864
203.514	96.9874	104.46	98.4982	78.5612	86.5198	89.5683	94.8658	88.2064	94.1428	88.4937	93.4589	81.594
206.679	93.1835	101.115	98.5791	85.009	96.5288	92.5629	90.9326	86.3748	91.5343	88.8075	85.9759	87.0197
209.847	91.7266	102.896	95.5306	81.3669	87.7608	91.6996	89.0956	84.2305	83.1634	87.9184	90.0052	85.9294
213.018	92.6709	101.304	98.1745	80.6115	95.1529	85.7374	92.9816	86.6652	90.4434	91.6056	94.8195	85.0467
216.182	90.4856	96.0162	97.9047	85.4137	92.6978	92.7518	88.6246	92.3833	92.6962	88.546	92.988	85.8255
219.347	99.4964	98.6061	97.554	79.8561	87.5719	84.3615	87.8474	89.7253	84.1119	95.5544	93.4851	89.5379
222.519	93.3183	109.02	100.387	82.473	97.8777	87.7608	92.5106	88.6308	89.9217	86.9247	95.8137	92.5493
225.687	91.268	101.115	106.268	87.464	91.7536	83.2824	84.5737	89.6583	86.673	86.977	90.9733	85.8255
228.853	98.0665	102.329	100.737	83.6601	90.054	83.6601	87.5412	87.2459	89.9929	91.1611	87.8336	94.6262
232.019	87.1403	108.129	93.6421	81.6097	93.4802	86.7356	85.8691	85.1686	89.4475	90.4027	90.7117	87.0717
235.191	81.0701	105.674	96.0971	77.8867	93.9388	88.0036	91.8512	87.4693	81.5983	82.6621	90.2407	91.6407
238.381	88.8129	101.034	93.1565	81.6097	91.8345	85.8723	94.2299	95.0637	88.7124	87.3954	87.2841	90.6282
241.559	88.0576	99.7392	90.6205	80.4227	93.804	86.7626	91.9689	84.5879	83.9459	82.0084	94.2177	93.8214
244.726	94.5594	104.838	101.358	81.1241	96.8255	90.5935	88.4833	91.8696	86.5307	93.7762	89.4296	92.134
247.887	90.3507	98.2284	99.9011	84.4424	93.0755	88.5701	85.139	90.4624	84.8945	86.6109	85.9759	82.866
251.065	93.5612	93.696	102.41	85.9802	98.2554	88.2194	85.0212	91.8249	86.009	92.5732	91.7844	88.6293
254.245	95.6115	104.892	100.252	77.509	96.7716	88.5432	80.8526	83.5828	88.8783	89.749	91.2088	91.8484
257.405	93.5072	101.25	106.133	79.4245	87.2752	84.3885	91.5685	90.3283	88.5701	82.7929	88.4354	92.9387
260.573	97.4191	103.031	98.3363	83.3363	90.9712	80.5576	83.3255	81.8405	84.9419	85.9571	87.4935	88.785
263.734	94.2896	102.896	96.9335	82.3651	96.259	85.6835	88.4362	81.6618	83.7325	84.2573	87.8598	86.2928
266.897	91.9964	102.005	102.599	87.1942	96.0432	94.3435	84.8328	87.0449	90.3249	86.0094	88.9848	91.6407
270.064	91.6996	103.112	94.0468	79.7752	90.5935	80.3957	87.8474	78.9591	84.4439	83.8912	86.787	87.7985
273.243	91.9964	101.493	96.6637	83.4442	93.4532	88.3273	91.7334	86.6652	85.4162	85.9833	86.3161	90.2129
276.416	94.1547	102.248	94.9101	80.045	98.8489	86.7356	87.1644	83.0243	87.1473	88.2584	84.3799	95.2492
279.583	91.9155	96.7716	95.5576	82.7968	89.5414	89.2446	80.8761	86.7545	82.4046	91.5533	91.6797	91.5888
282.749	90.7284	106.16	97.7158	79.0198	96.8795	91.4299	82.1244	85.3697	82.0963	89.1475	90.8425	90.5763
285.918	92.1583	95.4766	94.6403	82.3921	87.6529	83.3094	83.8672	88.7648	80.46	82.9236	86.8655	87.9283
289.079	91.268	107.914	98.1475	81.205	88.4353	89.8112	92.9345	84.8783	83.2108	82.8452	92.674	85.9813
292.253	99.4155	98.3903	96.7176	80.3417	91.4568	90.3777	85.7042	87.8043	83.3057	82.113	90.921	83.567
295.42	93.4263	103.112	99.8201	77.4281	87.7338	91.0522	86.8111	85.459	90.7043	90.2981	92.7786	90.161
298.591	86.277	106.484	103.381	84.5773	84.9281	85.9263	90.7678	86.7322	87.3133	84.9895	92.0199	90.7061
301.767	90.6745	100.144	95.3417	79.6133	89.8651	92.5629	86.081	83.27	82.9025	93.5931	93.6159	89.4341
304.958	83.714	98.0126	96.6906	81.5288	91.9694	87.0863	87.8474	76.9712	86.2461	87.9969	91.1565	91.1475
308.121	86.0612	92.9406	91.9694	78.0486	92.536	88.732	83.3255	81.9522	82.4283	87.8923	83.7258	87.4091
311.33	93.6691	104.164	94.3165	74.8381	89.6763	89.2986	87.7767	81.9745	88.5464	91.1088	89.2988	90.758
314.489	85.6565	97.2842	91.241	79.0468	98.6061	87.9766	87.9416	88.5861	86.9338	92.2594	89.0633	84.7871
317.664	92.6169	105.432	95.4766	81.3939	87.518	86.8435	81.2529	85.5037	87.5978	85.7479	87.1795	85.2025
320.832	92.5899	101.978	95.2878	78.0755	92.4011	89.4604	85.5158	78.5347	87.1235	90.8996	98.2208	88.188
324.027	88.1385	97.9586	97.6888	76.8345	90.3507	89.3255	82.8073	84.7666	88.8309	78.8441	91.7059	91.4071
327.211	95.018	102.761	95.4766	88.0306	94.4784	82.527	84.715	85.9727	82.784	86.6893	95.6567	86.3448
330.387	88.2194	98.3903	95.8273	85.3867	89.4874	86.4658	87.4706	85.8164	86.5781	85.4603	90.8425	90.3427
333.553	90.4586	104.406	101.061	89.946	88.759	86.4388	86.1281	84.4985	82.452	87.2385	87.8336	90.6023
336.725	91.9964	98.0396	96.9604	82.5809	89.8381	83.0935	86.2459	82.3766	84.2542	85.5126	85.8974	90.161
339.89	85.8993	98.0396	95.9892	84.2266	90.027	92.9406	89.9199	89.3232	92.5302	89.5921	89.7959	88.811
343.061	87.6529	102.653	94.2626	84.5504	90.8633	90.1079	84.3618	86.0844	88.2381	84.1527	85.0602	88.6033
346.226	95.3687	97.8507	95.0989	83.9568	87.3291	85.7104	83.4903	85.124	82.7603	89.8797	89.6389	90.5504
349.398	93.5612	99.4424	96.5018	84.4424	92.9676	90.6205	83.4432	88.6531	86.4833	84.6496	87.5981	87.7466
352.567	93.696	102.869	92.0234	85.3058	86.3849	87.1673	88.4126	85.9504	86.1987	90.5335	87.8336	81.1007
355.743	90.3777	99.7392	99.1996	84.5234	90.8363	88.3543	85.0919	82.6	83.5665	87.8661	91.2088	86.812
358.941	91.5378	97.6079	103.948	85.1439	85.0629	86.7356	87.5883	88.8095	81.7169	87.1339	89.9529	89.0966
362.107	89.0827	96.9604	101.817	85.1978	88.8939	88.9478	89.8964	87.0449	83.3531	80.387	94.6102	83.1256
365.269	89.8112	92.0773	101.412	80.3687	95.9353	87.4371	83.7023	85.0123	82.3334	85.1203	88.4354	81.8276
368.433	92.1853	100.845	100.306	77.7518	89.8921	87.7878	86.552	80.344	79.8435	90.6642	92.2815	84.3458
371.62	92.7248	96.5288	92.9137	76.9424	91.241	83.5791	85.6571	82.5106	80.8632	86.6109	89.9267	87.1755
374.825	91.8345	102.167	99.0647	84.7932	88.0845	88.5432	86.3401	82.3989	77.235	87.9969	84.2491	88.3956
378.017	96.3399	93.2644	102.248	77.2122	90.2158	84.4424	83.8201	83.4264	86.8627	86.2709	93.3804	81.6719
381.185	90.9982	100.36	98.9568	84.5504	89.9191	88.1385	86.4107	84.5879	84.6099	85.251	82.3653	87.7207
384.365	87.0324	104.73	95.7734	83.2824	95.1529	86.7356	84.3146	84.6326	85.1079	82.9759	96.9126	86.189
387.536	91.9694	100.737	99.8471	81.3129	93.0216	88.9478	84.1027	83.4487	83.8985	87.7092	86.8132	92.9128
390.704	92.6978	102.005	86.3309	88.1924	86.6007	82.0414	88.4126	85.057	82.5231	86.1925	89.5604	88.837
393.887	88.8129	95.3147	93.9658	76.241	95.3957	90.6745	87.1879	83.9401	82.9025	85.7479	91.5751	83.8266
397.056	97.1223	104.865	96.1781	80.8813	85.2788	86.5737	83.2077	89.0328	83.0922	87.5262	90.8948	91.7965
400.224	88.786	97.0683	94.8561	81.0162	94.8561	86.196	83.561	83.6274	80.1992	85.6695	93.5897	83.9564
403.408	90.8633	102.653	100.171	79.5594	87.7608	84.8201	81.983	84.5432	84.0171	88.3891	95.0288	83.1516
406.61	97.0414	100.629	93.5612	79.3165	85.8183	80.5576	86.3165	86.0621	81.1477	81.9822	88.5662	84.216
409.773	91.1061	95.0989	100.791	81.7446	93.3723	87.491	77.8144	83.4487	83.3768	86.6109	89.6651	85.6957
412.954	95.9622	96.7716	96.7986	80.7464	95.8004	85.6565	92.7697	87.581	86.6256	88.2061	93.9822	89.4341
416.123	84.1727	96.7986	94.3165	81.7716	84.9011	86.7896	79.4866	85.7047	83.4005	79.1056	87.9644	90.784
419.311	89.0288	87.6799	96.1511	73.8669	89.2446	92.0773	80.0989	82.1756	82.1911	87.2646	81.5803	88.4735
422.502	87.1942	103.489	99.5504	80.6385	94.1007	93.1565	88.5539	79.4729	88.8546	86.8724	84.2229	89.3821
425.679	91.7806	95.9892	92.6709	83.768	93.723	86.223	84.5502	90.038	82.6417	90.8734	87.8074	84.242
428.833	92.509	97.2302	92.0234	76.9155	85.3058	84.4155	89.8257	83.9401	84.0408	88.363	86.2114	82.0093
431.999	96.0971	104.433	90.4317	78.9928	96.232	88.0306	84.0556	84.9006	83.7325	82.6098	84.5107	92.2118
435.165	96.3669	96.1241	91.7536	78.5072	94.991	92.9406	84.9741	78.088	78.1835	88.5983	83.5688	87.5649
438.342	89.0018	100.36	99.1727	86.8165	94.5863	84.5773	86.5049	92.2046	84.3728	85.0157	92.7525	85.0727
441.517	90.027	94.1277	94.8831	85.009	82.7968	84.8201	80.1696	82.4883	86.1513	87.3692	78.179	89.8754
444.69	89.7032	100.899	93.3183	82.2572	87.9766	92.0773	80.7819	91.0431	83.1634	87.0554	94.0869	85.3583
447.864	89.1367	100.279	96.5827	81.1511	90.8363	87.8957	82.878	81.0811	80.1992	83.8651	81.7111	85.6957
451.052	82.8777	98.4982	96.5018	74.7032	88.4353	86.277	92.9581	80.4557	82.6891	86.9247	86.5515	91.1475
454.217	94.1277	94.8831	93.3453	88.8939	98.2824	86.7086	85.0683	81.8629	88.5226	83.1067	91.8106	83.3593
457.392	91.8076	103.786	96.3129	81.7716	89.1637	84.6853	85.6806	84.4315	80.9817	86.977	87.3365	86.5784
460.557	93.5342	103.031	90.7824	83.9568	85.1169	84.1457	79.8634	81.3044	80.5312	81.9561	88.7232	85.8255
463.721	89.6493	97.2302	91.3759	87.9227	92.2122	89.0018	89.9435	85.8387	79.1084	83.9958	88.9063	81.5161
466.912	87.9766	98.5522	101.655	80.4227	91.7536	85.7644	76.9901	77.1722	83.4717	88.5722	92.2815	84.7612
470.091	90.7014	99.9011	100.549	80.5576	86.0881	85.5486	83.6081	81.7065	84.9893	92.3379	89.7959	86.9418
473.257	92.482	100.522	95.0719	83.9299	88.6241	88.759	87.6825	82.5329	82.4046	82.5837	82.8624	82.5805
476.421	84.3615	99.1727	95.6385	79.6673	86.7356	82.9047	84.5737	83.0243	77.4721	87.84	80.3506	87.2534
479.602	85.5216	96.3129	89.946	83.0935	86.4658	85.6835	85.4216	81.7735	83.3057	83.1851	85.9236	79.3614
482.77	88.1655	97.0953	99.1457	86.223	90.5396	88.2464	83.2784	82.2872	87.2658	84.2573	85.034	78.6345
485.99	89.9191	94.9371	100.063	77.1313	89.8381	85.2248	80.9468	84.5432	81.2189	83.2897	88.7493	86.215
489.165	91.8345	102.653	88.6781	79.8831	88.6241	85.9532	86.8111	77.5966	78.8949	82.8713	83.4642	78.3749
492.329	89.4604	90.8363	92.3201	82.6349	93.9388	88.3813	82.5718	81.2598	86.9576	91.2918	84.9294	90.4984
495.52	88.759	93.6151	94.1547	79.3165	98.2014	83.5252	89.967	83.4487	81.1003	85.3818	85.9236	89.2004
498.699	84.7392	90.9712	102.221	80.1799	94.6673	81.4209	81.1823	81.3938	83.8985	86.454	86.7085	87.9543
501.881	86.7356	99.4424	96.232	81.7176	88.759	89.2986	82.6896	79.9419	81.1952	88.4676	86.9178	85.4881
505.073	84.7932	105.89	91.4568	86.1421	86.4928	86.9784	83.8672	82.1086	86.5544	88.4937	89.5081	84.3977
508.254	85.5486	94.4514	97.1223	82.1763	91.8615	81.5558	86.7405	80.411	79.7961	86.5847	81.5542	86.2928
511.431	83.1745	89.1367	96.4748	83.768	93.723	89.3525	79.8398	80.1206	81.622	85.3818	88.383	86.1111
514.593	93.9119	93.75	97.1223	81.0432	89.0018	87.1673	81.3	81.7735	76.4525	90.8996	84.6677	90.3427
517.773	90.9712	100.09	100.198	79.5054	85.0629	86.5737	80.3344	80.3216	82.6891	86.2186	89.1418	81.8017
520.95	90.6475	97.9586	89.8112	77.1853	86.7356	86.4658	82.1244	82.9573	81.5983	87.1339	83.4903	86.5784
524.134	80.4496	95.6385	95.6115	82.0144	88.705	86.6547	87.7296	77.3286	83.8985	85.9571	84.7985	77.5961
527.311	90.3237	98.2824	102.032	78.696	86.3849	87.7068	78.78	85.9951	84.1356	81.7469	80.3506	82.9439
530.477	94.2086	99.2536	92.1583	79.1817	90.8363	90.3507	88.7188	78.1774	79.8435	85.8787	84.8247	87.9543
533.633	88.5701	98.3363	95.3147	80.1529	91.0522	80.8273	77.9086	83.9625	80.2703	84.3358	83.8828	89.8235
536.804	92.3201	95.2068	94.8831	83.0935	87.6529	86.6547	83.3255	83.2254	81.4797	77.6151	83.5688	86.5005
539.976	85.1978	96.0162	96.7446	78.4802	88.3273	81.259	80.1931	76.2788	80.9343	86.7678	80.6907	87.3313
543.144	87.464	96.7716	89.7302	81.4748	91.0791	86.0881	83.349	84.4762	81.0055	84.728	85.662	84.1641
546.311	86.9784	93.0755	94.8831	80.3147	91.4029	84.8741	75.3179	91.5122	79.5115	83.3944	91.0518	88.188
549.479	86.9245	98.2284	92.9137	80.5845	87.0054	83.5791	83.1842	81.8182	81.5746	84.9372	86.9963	88.837
552.656	90.4856	100.441	93.3723	80.8004	93.5072	86.8975	84.3146	77.3956	82.0014	80.9623	85.6358	83.2295
555.833	92.3471	102.977	93.723	88.2194	94.4514	86.5198	79.4159	79.2048	82.286	86.5586	82.7577	88.0322
558.999	93.5612	95.1259	91.6727	77.7518	89.7572	92.482	85.2803	77.4179	80.2466	80.4132	78.3883	86.5524
562.18	94.2086	96.286	86.8705	77.6978	85.7914	84.4964	84.8092	82.801	81.788	87.5262	84.3537	83.3074
565.351	89.946	99.0108	97.6619	79.5594	92.8327	84.1727	90.2025	82.9127	79.9383	86.7939	86.1591	84.242
568.55	87.2752	95.3147	96.3399	80.4496	87.8957	86.1691	86.5992	83.27	78.1835	81.2762	83.6735	75.8307
571.72	90.1619	97.7698	98.6871	75	89.2716	89.2446	86.8111	89.0328	82.2148	82.3483	85.5835	78.5826
574.925	95.8004	98.3094	95.5845	80.3417	84.7932	83.8759	81.2058	85.9057	81.8829	85.9833	79.932	82.7362
578.099	85.1439	103.246	92.8058	79.6673	93.2914	86.0072	84.0791	81.8629	80.9106	89.9059	85.505	82.5026
581.272	90.9712	97.8777	97.7968	84.5234	90.9442	83.2554	80.0283	78.9368	80.1755	83.499	79.1994	91.5628
584.45	91.5108	97.0683	97.6349	82.1493	90.7554	83.8219	82.666	79.4282	80.2466	84.0743	88.0691	77.0509
587.619	89.1367	96.4209	94.7482	79.1817	89.5414	86.1151	81.1823	81.7512	86.4359	85.7741	89.1418	83.3593
590.787	94.7212	97.7428	91.1871	84.0108	91.6727	77.5899	84.1733	77.2392	81.5034	78.1119	85.4003	80.27
593.955	87.3291	98.1745	94.8022	89.2176	91.5108	86.4388	83.7023	86.6652	87.8112	83.8651	89.1156	79.4912
597.131	91.9964	103.759	95.9083	78.75	87.2212	82.0144	86.1752	81.3491	81.124	86.1402	84.4322	84.216
600.325	89.4604	98.8219	96.3129	82.1223	92.2662	82.9856	80.9939	78.5124	80.294	86.7939	85.7666	83.1776
603.499	89.6763	100.98	91.214	85.8723	93.1835	89.0018	79.2982	81.6172	78.729	89.5397	84.6939	90.2648
606.68	93.9119	95.8004	92.0504	80.8813	88.2464	87.5719	78.6387	77.3509	80.792	77.4843	90.0837	84.6573
609.86	88.3273	98.5252	96.4748	79.9101	89.973	91.9155	85.0447	78.5571	76.9267	90.0628	85.034	85.8515
613.037	87.3831	96.3399	101.412	88.6781	88.4353	87.5989	84.3146	81.1704	86.8153	81.25	87.9121	85.6438
616.208	91.9155	101.115	94.991	79.0737	88.8669	91.3759	81.5356	79.0261	82.7603	83.6036	82.1298	84.5016
619.392	86.4388	100.441	95.9892	78.804	88.4353	84.5773	87.447	84.2752	79.0372	82.9498	86.2637	81.6978
622.569	87.8417	98.4712	88.4622	77.9406	95.8004	83.2014	79.3688	79.4059	84.9182	83.4728	84.1706	87.0197
625.75	82.5	98.5791	94.8291	79.6673	93.8309	82.1223	77.838	79.9419	79.4878	85.1203	84.2229	82.8401
628.935	91.1331	97.3651	94.8561	78.3993	89.1097	91.4838	80.2402	86.5758	85.4399	84.8588	84.9032	84.891
632.105	86.7356	101.79	86.7086	80.5036	95.9353	88.1385	77.1314	79.4282	83.0922	83.4728	85.1125	82.3988
635.283	85.7644	102.842	95.2338	86.0612	93.5342	86.9514	81.4649	78.6241	83.6139	85.9571	86.787	87.2015
638.45	85.4946	97.5	98.8759	85.6835	90.1888	86.9245	82.7838	83.9625	83.3294	77.4059	87.415	86.6303
641.609	91.3759	100.953	91.6457	77.5899	90.9442	85.2788	83.1135	78.356	81.4797	82.4268	77.865	81.2565
644.782	89.4874	93.0486	98.4173	83.6061	87.8147	87.5719	79.7927	79.5622	82.8551	83.1851	86.787	86.3188
647.951	85.8453	97.7968	94.5863	82.8507	86.7896	84.5504	79.9341	80.5673	79.7012	88.9383	86.4992	81.1007
651.121	90.7824	100.171	98.5252	79.3165	87.3831	83.1475	82.7367	75.1619	87.171	80.4916	85.1648	90.8619
654.288	86.7896	98.0665	98.2284	82.9317	86.4658	87.9496	82.1479	83.2254	80.0095	86.7678	85.0863	76.1942
657.457	86.3309	101.358	95.8273	82.6349	91.1061	81.5288	80.4993	82.2649	84.5388	87.6831	85.6358	88.3178
660.619	94.0468	102.869	98.2554	77.3471	86.0612	84.5234	81.5591	80.5673	80.8157	85.068	77.9696	85.1246
663.81	100.495	94.2896	96.232	82.2032	85.8723	87.5989	81.1352	76.6361	83.3768	78.6872	83.7258	80.9709
667.01	94.7752	98.4982	95.045	77.455	86.9514	87.1133	82.7367	84.1412	77.899	86.454	82.1298	86.3448
670.193	88.8129	98.5252	100.306	83.4712	89.1906	83.0665	82.195	78.1327	78.4681	79.9425	83.8305	79.621
673.36	92.2662	98.4712	84.6313	77.7788	88.759	88.5971	79.1804	82.2202	80.6735	81.0146	84.0921	79.5691
676.531	84.6853	99.0917	94.8022	82.9856	89.0288	81.7176	81.8888	79.9866	80.3652	82.1653	90.293	75.1817
679.697	91.4838	100.117	92.3201	73.759	80.3147	85.6025	82.3128	83.5604	83.6377	91.2395	84.8509	89.2004
682.871	93.0486	96.5558	97.2302	77.1583	86.6007	83.9299	81.2765	85.0123	83.4242	81.7469	86.944	75.3894
686.029	87.3291	98.8759	88.6511	78.9119	83.0126	87.6529	82.3834	78.0433	76.7844	87.0031	88.383	80.9969
689.215	88.732	103.138	93.696	81.6367	96.5018	84.1996	81.4885	78.8698	81.8117	83.6036	85.9498	84.9169
692.371	96.286	92.1853	91.8076	79.8831	88.2194	95.7734	81.7711	84.2975	86.7678	79.7071	92.203	80.9709
695.536	87.1942	105.351	93.9658	75.1349	88.5432	83.3094	87.9887	79.2942	75.3379	81.3023	85.5311	87.9024
698.701	86.3309	99.5504	91.7266	78.2104	79.6403	88.1655	78.7094	81.5501	84.8233	83.7343	88.8278	85.7477
701.881	86.7626	97.527	94.6942	83.741	95.2878	83.741	80.1931	77.7083	80.3178	86.5847	91.3919	85.0467
705.071	85.1978	102.086	94.9371	83.8219	85.0899	85.6565	84.4089	82.8457	83.7562	80.5439	87.5196	85.6698
708.24	79.8022	94.1007	96.232	76.0252	87.9766	86.5198	86.1752	78.3784	85.013	87.8661	86.63	85.6957
711.405	84.6583	100.441	95.4227	80.3957	90.9442	84.0108	84.7386	76.0331	83.6614	82.8713	89.0633	83.3333
714.567	93.5881	98.2284	94.6133	82.8777	96.8525	82.2572	77.5553	81.2151	77.899	87.3954	78.6238	83.2814
717.729	86.9784	98.714	92.9676	83.2824	92.6978	88.8939	85.1625	78.4901	84.4439	82.4006	84.1444	83.7747
720.932	84.982	97.2842	92.2122	80.9892	92.8867	85.4406	83.5374	80.3216	77.7567	79.9948	83.9089	77.7518
724.099	85.5486	97.4191	95.0719	85.9532	92.7788	85.8723	83.0193	81.5055	78.8712	82.0345	84.6939	87.0197
727.271	93.1835	105.054	95.3417	72.5719	92.3201	88.732	77.6024	79.8526	80.1992	86.2971	90.5808	81.6459
730.467	89.7302	102.194	94.1817	74.9191	88.8669	88.3543	82.1479	82.4883	86.0564	79.6025	87.8074	85.7736
733.637	87.7338	93.8309	91.5108	85.5755	90.7824	88.2464	87.5412	75.5193	78.563	84.3881	84.7985	84.0862
736.8	87.8957	95.3957	95.6115	83.2284	88.5701	88.759	79.7456	83.4041	78.7764	81.0931	79.8796	82.7622
739.967	82.6349	89.973	97.0683	85.8453	92.4281	83.2014	78.3325	80.4333	79.9858	89.6967	86.6039	75.1817
743.129	92.9406	96.4478	92.9946	76.5378	86.9245	83.0935	84.7857	79.1378	84.2068	90.1674	77.0016	85.54
746.298	90.8633	99.6583	91.5917	77.6709	90	86.4388	78.8271	80.4333	78.6104	79.1318	79.461	82.4766
749.492	86.25	102.788	90.8633	76.8885	96.7986	85.4406	82.1008	83.0243	78.7052	85.931	86.7085	83.4631
752.657	83.0665	103.624	97.8507	81.7176	90.054	79.7212	82.0537	80.612	78.5392	82.4791	90.7378	79.4652
755.827	92.509	100.387	94.7482	82.9047	85.3597	85.3327	81.5827	82.7116	80.294	78.8964	84.6154	85.54
758.995	92.6169	98.6601	90.9982	78.804	93.3183	80.8273	80.146	84.9006	76.2153	81.59	85.6096	86.6303
762.173	93.2914	95.7734	91.6727	74.4335	88.1115	80.3957	75.6948	76.4128	81.1714	84.545	83.8043	83.9304
765.335	89.973	93.696	91.5378	73.8669	85.5486	90.4856	82.5718	76.2564	78.4918	86.4017	82.3391	82.8401
768.541	87.7338	91.0791	89.0827	80.9083	88.3543	82.7968	79.4159	81.7288	79.4166	81.4331	83.2548	78.5566
771.703	89.4874	97.554	94.4514	81.5018	88.3273	87.1942	78.9213	81.9299	81.1714	84.7803	83.5688	80.0104
774.905	83.1475	97.473	89.0558	80.3417	85.009	89.8112	78.4032	82.4436	79.3218	88.3891	82.3391	79.9844
778.064	92.2932	98.3094	95.8004	80.9353	92.3741	84.3885	79.2275	84.5879	75.9782	80.4655	87.8859	87.8764
781.259	84.6853	88.5162	90.6745	77.1853	86.25	83.6331	84.5737	80.0089	81.5983	83.2113	83.6473	81.4382
784.42	83.768	96.8255	92.9946	85.1169	93.5342	85.8183	85.4451	73.3304	78.9661	85.5387	86.5777	81.7497
787.611	83.6331	98.4442	98.5252	77.0773	89.3525	86.223	78.4268	81.8405	76.8793	83.9958	81.3972	80.5296
790.77	94.991	96.7986	94.2896	74.0018	88.2734	79.1277	81.1116	82.0862	80.0332	81.6684	77.5772	80.6075
793.947	82.3921	100.764	94.0737	82.1493	87.6529	83.6331	83.6317	76.7702	80.4126	85.068	90.7117	84.216
797.121	93.1835	96.4748	95.1799	74.946	100.36	85.0899	77.0843	80.746	81.5746	83.1067	86.1852	79.9065
800.305	90.3507	92.9406	95.4227	77.3201	89.0018	81.1781	79.2275	86.3525	77.7093	78.9226	80.3506	83.9823
803.472	93.9388	102.545	93.0216	80.4227	90.9173	81.1241	79.8634	77.4849	80.7209	83.1067	81.999	81.8536
806.646	88.6511	97.1223	99.0647	77.8058	86.196	89.7842	80.5699	84.9676	82.3808	81.1977	82.1559	85.5919
809.832	89.1637	93.3453	97.6349	79.8831	85.0629	82.9047	79.2511	79.6516	81.3137	82.113	80.3244	79.9844
813.008	83.1475	93.4802	95.1529	78.0755	86.4388	85.8453	81.2294	83.203	73.1326	83.1067	83.5688	83.0997
816.227	86.223	99.1996	94.5594	79.7482	87.6529	81.7716	80.4993	83.6051	78.6104	85.1987	82.0251	78.5047
819.413	90.8094	96.9335	89.8112	80.2338	87.4101	88.2734	75.2708	82.2202	78.6578	84.7803	82.1298	86.3707
822.571	86.4119	93.9928	88.5971	79.0468	84.4964	82.0144	79.5101	80.9917	81.6457	82.4791	80.0366	84.3977
825.741	90.3777	95.7464	88.0576	75.5935	87.6259	85.9802	77.1079	82.1086	78.0413	81.2762	90.1622	82.866
828.905	88.6511	102.059	92.8867	80.6385	95.5845	89.0018	75.365	76.4128	78.9898	80.2301	82.6792	81.9055
832.079	86.4658	96.1241	98.1745	77.2932	90.2698	73.8399	85.0212	75.7203	80.5075	83.9435	79.6703	79.8546
835.245	90.2698	98.768	84.0647	77.536	88.8939	83.3903	77.1314	82.9797	78.397	90.0366	81.0832	84.2939
838.433	87.7068	100.252	90.5665	82.473	86.0342	88.2464	78.5916	82.9127	81.7406	78.5303	86.944	82.3209
841.627	91.0522	93.6151	97.0144	82.6079	81.3399	91.1871	81.8182	78.155	81.8354	85.9048	81.0047	84.0343
844.806	88.3273	94.5594	92.7518	76.9424	84.982	83.6601	85.2803	73.9111	77.235	83.682	94.27	79.8546
847.984	87.0054	96.5558	95.5306	74.4604	95.9353	87.2212	79.1098	80.0759	74.6028	80.9885	86.6039	83.7227
851.153	87.7608	100.495	96.7176	75.9712	89.4065	81.4748	83.3019	77.7753	78.9898	85.4864	81.4757	80.6854
854.307	88.759	98.9838	96.0701	85.8183	91.214	86.8435	78.78	81.3938	74.1997	81.6684	89.2988	81.4901
857.472	93.2104	97.0683	96.7716	77.9406	88.3543	84.4155	80.6642	83.6498	73.678	86.2971	77.7342	83.9823
860.671	94.4784	92.6709	90.4047	79.5863	84.8201	89.8381	84.4795	85.4813	79.5352	84.2312	91.4966	75.3634
863.84	86.8435	96.0701	97.6349	79.2896	88.0036	92.9946	76.3071	79.0485	82.95	84.8326	87.9383	77.9335
867.015	87.3831	99.5234	88.8669	76.5108	86.6817	83.4982	83.1842	81.8629	81.7643	82.6098	82.0513	81.5421
870.18	82.9047	97.8777	91.6187	76.4568	92.0234	86.6547	78.9449	81.5725	77.733	86.4017	81.2664	87.0457
873.366	86.5737	95.4766	93.2914	84.8201	92.6709	91.6457	76.6368	83.4487	83.3057	88.6768	89.5866	82.4766
876.536	92.0234	92.7788	94.2896	77.6439	94.3165	80.3147	87.0231	77.2169	76.903	83.499	82.7054	85.8515
879.694	87.464	97.6619	94.8291	75.2698	88.0036	82.5	81.8888	78.6241	86.0327	86.5847	82.3391	81.2825
882.868	96.7176	95.6385	87.1403	74.973	91.1061	86.5737	84.5266	77.4849	79.3455	85.6956	82.6269	75.7529
886.028	90.1619	95.6655	95.6655	85.6835	87.1942	88.4892	80.0989	79.5622	77.0453	80.4916	75.5364	80.6334
889.232	81.1511	93.696	95.0989	73.786	88.9478	88.0576	76.3542	77.8646	75.741	83.8389	85.348	79.1018
892.41	80.1799	98.795	95.5845	75.9982	92.5629	86.8705	78.8271	76.4574	78.729	76.8828	85.2957	80.9969
895.573	86.5468	99.0378	97.7158	74.5683	88.6781	79.9371	76.2365	75.8544	72.3974	83.8912	82.3391	79.9325
898.756	89.2446	100.629	98.0935	81.7986	86.7626	81.9604	76.6368	74.7822	80.9817	84.1789	85.0602	80.8411
901.932	83.5252	96.8255	87.8687	76.7806	86.223	84.5234	78.1206	81.1258	76.4525	78.6088	85.1125	88.7591
905.1	88.6241	98.741	90.7824	78.2104	88.1385	85.4406	76.0245	79.8526	74.7925	80.9623	81.9466	79.4912
908.265	92.2932	97.446	87.8417	72.8417	90.1349	80.8813	83.9143	79.2495	80.1043	83.2897	80.5338	83.4112
911.427	78.0486	98.4442	91.6457	80.4496	88.759	81.9335	80.9939	75.3183	76.9504	87.3954	82.7839	88.7331
914.591	86.6817	90.2158	93.696	80.2338	89.5953	91.6187	77.0372	80.9024	79.1558	80.8839	84.6415	83.4631
917.785	88.9748	92.2932	87.1942	74.2986	90.7824	88.732	77.9086	82.0862	77.6618	83.0805	79.5657	82.7362
920.974	93.6151	96.205	93.5072	81.0432	89.7842	82.9856	83.0429	74.8492	74.9348	83.3421	84.1444	82.918
924.135	86.9514	97.446	92.9137	83.795	88.9209	82.0144	84.1969	74.8716	75.6225	83.8651	77.237	80.244
927.329	86.1691	105.243	94.4784	78.0486	90.8633	81.1511	82.5247	87.2236	82.8077	81.3285	84.3014	79.0758
930.501	95.9892	98.0665	88.8669	80.8813	89.7032	82.6888	82.7838	80.7684	81.3137	79.7071	82.9932	84.6054
933.709	90.3507	98.0935	89.0288	74.7842	89.0288	86.6547	79.7692	84.4762	77.4247	80.4916	84.0659	81.1526
936.887	89.973	92.2392	98.5791	79.3165	90.3777	83.6331	82.1479	83.0467	81.2663	78.8441	87.101	83.8785
940.053	88.4083	96.7716	99.955	81.259	87.8957	82.7428	81.8888	84.1188	76.6896	83.3944	83.9089	82.4766
943.231	90.4856	99.0378	93.0755	72.3561	95.4496	91.6727	79.6985	78.5124	77.1876	79.4979	84.4584	84.3977
946.419	89.6493	88.8129	92.1853	74.3255	92.509	87.6799	81.8182	83.9178	80.0332	85.2249	82.7316	75.0519
949.583	85.0899	95.2338	96.8525	76.0252	87.7878	86.5198	82.1008	76.3234	75.8359	75.4969	79.8012	81.1526
952.749	89.8921	97.5809	93.777	79.5054	84.6043	87.9227	82.1244	76.8818	85.2739	82.1914	86.6824	76.5836
955.936	87.7608	88.2464	95.3957	77.5629	86.1691	85.5216	77.7202	79.7632	76.9742	75.0262	82.5484	76.8172
959.112	91.3489	90.4856	99.8201	73.4622	90.054	86.223	79.0626	78.222	80.4838	85.068	78.4406	74.4548
962.288	91.4568	91.3219	97.5	75.2428	87.464	85.0899	79.0862	83.136	80.6023	82.2176	88.0691	85.8255
965.453	89.973	97.6619	90.0809	78.3723	90.3777	78.6691	80.7348	79.2272	81.6694	84.6496	77.9696	80.4258
968.627	95.3417	95.5306	92.5629	80.9622	92.3201	79.8022	80.5228	83.5828	81.954	81.2762	88.1476	82.5545
971.798	81.5558	95.3687	94.1277	78.9658	81.0162	78.2374	80.4993	84.6772	80.9106	82.1914	84.5369	80.4517
974.987	78.9119	100.71	95.9892	76.6187	87.4101	86.3309	79.7927	72.839	77.567	87.1077	81.1879	85.3842
978.166	83.3363	94.6942	90.3777	82.0683	87.1673	84.2266	82.5247	78.8474	75.3379	82.1653	76.6091	83.0478
981.34	87.464	93.3993	99.4155	79.5863	83.0665	81.7986	77.6967	81.1928	82.0488	80.5439	85.5311	77.8297
984.497	89.2716	87.7878	90.4856	77.9406	85.7374	82.473	77.3434	77.5073	76.9267	83.0544	88.4877	84.6573
987.675	86.6817	94.2896	90.6475	84.8201	89.8112	85.1439	79.3688	78.8028	80.2703	75.1831	85.0602	82.1911
990.855	86.8705	90.7824	95.3417	72.4371	94.6403	82.3381	75.4828	81.7065	82.5231	84.9111	81.371	81.5421
994.049	84.2806	93.6421	88.0036	80.4496	85.4676	85.6025	80.7584	75.4746	77.2824	81.6946	79.4087	85.9294
997.244	88.8399	92.9676	89.6763	77.6709	80.4227	91.4299	81.4649	84.5209	76.8793	80.3347	86.4731	81.4642
1000.44	88.5701	89.5953	89.1367	79.6942	91.7806	86.9514	77.4376	77.2839	72.2077	85.4603	83.752	75.9086
1003.6	86.223	105.674	93.8309	77.1043	95.1259	85.3327	79.7692	80.545	82.618	80.6485	78.5191	84.891
1006.78	90.1349	90.6205	91.6187	77.536	92.1313	78.2104	76.5426	75.1619	77.8041	81.6423	85.662	79.7248
1009.94	79.9371	91.241	86.7626	75.8094	99.0647	86.196	86.1046	83.27	77.235	77.3013	82.9932	82.243
1013.11	86.0881	98.714	90.9173	75.4047	91.5378	84.0108	82.3128	78.222	78.2073	85.4603	80.2983	86.1371
1016.31	88.0845	102.032	96.286	81.6906	85.7644	88.9748	80.1225	79.7856	79.3929	80.4655	79.8535	81.2825
1019.5	81.6637	95.3417	94.5054	84.1727	87.5719	85.1169	82.1244	73.5537	76.4287	82.8713	86.3161	84.3198
1022.69	86.223	94.8291	92.9676	81.3399	91.0522	87.3561	79.3453	72.3699	76.8793	78.7657	77.6295	77.1288
1025.87	87.1133	101.439	92.6978	75.8903	86.5198	87.7608	75.5299	78.4454	79.8198	83.0805	79.0424	77.8297
1029.04	92.3471	99.7122	89.973	86.6547	85.7914	87.0863	81.5827	79.4282	76.1442	82.6098	77.3679	86.6822
1032.22	84.3076	96.232	91.3759	76.3489	88.3543	80.9622	83.0429	75.0503	79.9858	82.9498	87.7551	74.351
1035.39	82.8507	99.0917	92.1853	79.5324	95.3687	87.5719	78.5916	81.4385	81.124	86.3494	78.4668	79.0498
1038.58	81.3939	95.5845	95.2878	73.759	92.5629	85.8183	71.9736	76.5021	77.0216	89.6705	79.461	75.7529
1041.76	89.1097	96.205	93.5072	75.0809	90.1619	81.3129	74.2581	77.0829	75.3379	81.1454	83.5688	81.1267
1044.93	90.6745	92.3201	94.5863	78.4263	88.9209	86.6277	78.4974	75.7427	79.7486	77.8766	78.022	82.1132
1048.09	86.1151	99.6853	98.9838	81.259	90.5126	81.1511	81.1587	78.1327	76.737	85.0941	80.2198	78.1153
1051.29	88.759	93.9388	98.0126	87.2752	85.4137	86.1151	80.8997	82.734	80.8632	82.4268	79.618	83.1256
1054.46	87.9496	95.2878	92.2122	77.9946	89.2986	78.5881	80.7348	72.4369	74.6502	81.4854	83.6996	74.0135
1057.63	86.7086	96.1511	94.3705	70.5486	86.7626	82.527	83.6317	77.6636	72.848	80.204	89.5866	78.4528
1060.79	86.7356	99.1187	89.0827	73.1115	93.5612	82.8777	76.6839	75.564	76.737	86.1402	83.3857	76.947
1063.97	83.4442	100.009	96.0162	73.6781	91.8615	85.0899	83.6081	73.6654	74.6977	83.159	82.1298	84.6314
1067.15	87.5989	97.2302	94.1277	79.6673	88.8669	86.7356	80.4051	78.1774	76.4762	77.9027	87.2318	80.4517
1070.32	92.509	94.3705	98.3903	71.9514	84.3885	79.5863	78.8978	79.7856	78.5392	79.4195	77.7342	77.4663
1073.49	90.8363	96.4478	92.9406	78.8849	83.4442	86.7896	78.4268	79.7409	78.3021	82.7406	77.865	89.6417
1076.66	79.7482	95.3417	89.2986	69.5234	87.8957	84.955	77.7202	77.4626	81.3137	79.0533	81.2664	83.2555
1079.84	85.2518	96.5827	97.2572	79.3165	78.1295	84.2536	75.8361	82.6446	73.5594	79.3672	89.7436	81.0228
1083.05	90.5935	94.2086	91.4838	74.4335	92.9946	81.0701	76.731	78.4677	78.0887	84.0481	79.461	81.8795
1086.25	84.1187	92.2392	93.3723	80.9622	90.5665	87.6259	75.8361	78.1103	73.2274	82.6098	84.5892	78.4528
1089.43	84.4964	98.8489	93.3993	72.4371	87.0863	81.6367	78.8742	77.4849	82.95	81.6423	84.6939	81.3344
1092.59	87.464	92.8327	92.9137	77.0504	87.7608	88.786	79.5808	79.5845	77.0216	79.0533	79.9843	84.1121
1095.77	90.1349	94.1817	92.5899	84.6583	91.9155	89.1906	77.8851	82.4659	74.3419	81.8253	81.842	77.5961
1098.94	84.5773	89.973	91.3759	82.6619	94.6403	79.7482	78.8742	77.9987	80.1281	77.4582	81.6588	85.2285
1102.13	88.3004	95.4766	94.1007	81.1781	94.2626	83.795	78.5681	74.6929	85.2265	85.251	84.8247	80.1661
1105.32	85.009	94.1547	95.2878	75.2158	85.0629	82.2842	74.8469	79.9643	80.3889	85.4864	84.6677	85.0467
1108.5	85.2518	97.3112	90.027	73.6511	89.973	79.6133	77.5789	76.0331	73.7965	81.0146	83.6996	74.8183
1111.67	86.277	92.3201	90.1349	76.7806	92.4281	80.4227	78.1441	76.8148	78.3495	84.8326	85.0602	81.9574
1114.84	90.5665	99.5234	84.7392	78.696	89.5953	86.8165	81.9359	84.3645	79.5352	81.5377	85.9759	77.8037
1118	85.3327	92.2392	93.3183	79.2896	76.5647	82.0144	74.1875	76.1894	78.0413	75.8368	81.4757	77.2845
1121.16	93.1295	102.437	96.1241	74.1367	91.295	88.8669	79.6985	69.7119	80.0806	79.6287	79.0947	82.5286
1124.33	86.5468	102.275	94.8291	84.6583	86.8975	87.8417	76.8252	85.7047	77.8278	75.9937	83.7258	79.4133
1127.5	88.5162	97.7428	91.1331	71.4119	86.3309	82.2302	76.4013	76.1671	79.4641	81.59	77.865	80.5296
1130.69	85.6565	93.75	85.7104	80.1799	92.7788	84.8471	76.6839	73.3527	79.5589	79.341	78.7284	81.9574
1133.86	82.2032	95.8543	92.2392	82.9317	80.8004	84.0108	76.8959	77.1722	78.8238	81.1715	73.3909	74.9221
1137.02	93.8309	94.6403	93.9119	80.1259	88.759	81.1241	79.7927	74.0228	76.405	83.1328	76.1381	80.1921
1140.2	88.2194	94.9101	87.6529	78.6421	90.6205	90.9712	74.8234	78.9145	78.9898	78.295	78.7023	82.892
1143.38	89.9191	95.3417	88.0576	80.045	91.214	82.9586	71.9972	82.3543	74.4368	78.2688	83.3595	72.9491
1146.54	81.0701	100.198	94.3975	84.955	91.0252	82.9047	79.9105	83.0243	81.4797	80.2824	83.6735	76.5836
1149.71	90.3237	98.5252	88.4622	81.8795	83.2554	82.6349	82.6425	74.6482	78.0887	77.8504	80.5076	81.2825
1152.89	84.5504	90.2968	92.8058	79.6133	91.6727	82.1763	77.8144	86.4865	74.5554	80.204	79.5133	84.3977
1156.05	90.8363	94.7752	88.732	75.5396	84.6853	88.705	82.0537	73.174	75.4565	80.2563	79.2517	75.9346
1159.24	85.1709	95.5036	89.2716	79.1547	81.6367	82.3381	75.8596	79.3612	78.8238	84.5973	76.426	79.2835
1162.41	83.9568	91.4299	95.3687	79.0198	88.0036	84.4424	77.0843	71.9008	82.2623	71.2343	80.7954	81.1526
1165.59	85.6295	93.1565	91.4568	84.7662	78.5072	81.232	75.3179	78.8921	73.1326	81.773	82.2606	88.8629
1168.78	92.0504	103.112	91.6187	79.8561	84.9011	83.5791	81.3943	75.1843	77.235	75.7584	84.3276	74.1173
1171.95	94.8831	95.5576	90.6745	71.4388	81.1781	90.1349	78.9449	79.2272	72.2552	79.7594	80.6907	82.9958
1175.12	86.0072	91.6727	93.6151	73.3543	90.0809	82.2572	82.1244	79.6739	77.3536	79.1056	80.5338	81.2046
1178.32	85.1169	96.259	91.7806	74.6223	87.8687	83.5522	73.057	73.5761	76.073	79.0795	82.4437	81.1007
1181.5	85.3327	95.2068	90.7284	77.3471	85.009	79.991	74.1168	74.3132	80.0806	79.2364	85.1387	81.6719
1184.68	83.5791	90.5665	87.6259	83.3094	87.1403	82.5809	75.0118	84.1188	82.5468	82.8713	78.3359	75.1298
1187.86	83.1475	98.768	88.9209	80.9083	84.6313	83.9568	75.3179	83.5828	75.5513	84.3881	78.8592	79.1018
1191.03	83.1745	98.9568	92.8058	76.0252	84.9011	82.1223	81.0174	76.5021	79.7012	83.4205	78.6761	76.8432
1194.22	86.8165	91.1601	91.4838	75.9442	84.6043	82.1493	79.3217	77.3732	75.2194	75.523	80.0105	73.3385
1197.39	81.0162	89.8381	94.4784	76.5917	95.4496	82.4191	78.5681	76.5691	75.4802	80.3347	80.3506	77.8557
1200.58	86.6547	98.1475	92.9406	80.4227	93.804	81.205	79.6043	79.4059	77.567	76.386	83.2548	80.8671
1203.75	79.2356	89.0827	85.9532	74.973	86.7896	82.527	77.6967	83.6274	76.9504	79.3933	83.5165	77.6739
1206.93	84.9011	97.9317	92.8058	77.7788	89.4604	85.7374	71.5968	72.5039	77.401	83.7082	81.4757	79.9065
1210.09	83.8759	97.2572	91.5378	75.7014	87.2482	84.3345	76.3778	78.5347	74.6502	83.499	76.5829	82.5545
1213.26	81.286	89.0558	96.8255	78.3453	86.9784	84.9011	77.5082	72.7943	75.6225	82.4268	79.9581	77.5182
1216.43	90.8633	91.241	91.214	83.6871	90.4856	85.0629	78.6152	76.2341	77.9701	83.4728	83.1763	77.2326
1219.61	84.1187	95.8273	95.1799	78.1835	92.8597	85.3867	78.7565	77.5519	76.7844	79.7594	85.505	77.2066
1222.79	88.4622	90.1888	89.1637	75.4856	86.4119	79.5863	76.0716	77.9987	78.1124	81.7992	79.1994	76.0384
1225.96	87.545	95.5576	93.0486	74.6763	91.7266	90.2158	79.3688	67.4559	77.3536	82.5837	81.6588	79.8287
1229.12	81.0701	91.1061	95.7464	74.1097	89.7572	84.3345	74.7056	78.8474	72.1603	79.5241	73.4171	77.8037
1232.33	92.9676	96.5288	93.3723	80.2338	94.8831	88.0845	80.8055	76.3904	72.0654	80.4132	83.9351	75.3894
1235.49	77.5629	90.7824	91.8615	84.8471	82.446	85.1709	73.952	79.3388	78.3495	82.296	78.0481	83.9045
1238.66	86.196	104.433	89.8921	73.3004	85.9263	83.6061	78.6387	78.9815	73.3697	74.6339	78.022	75.5971
1241.87	87.8417	91.8076	94.8561	79.7212	80.5306	92.7788	75.3886	78.7804	72.9429	80.1255	83.281	80.6854
1245.06	93.1025	97.2572	92.455	81.7716	89.5144	81.1241	77.6731	79.2718	74.4368	79.7333	80.6646	77.3105
1248.23	82.8507	95.4496	92.482	79.9371	92.2932	81.9065	77.1079	76.9488	80.5075	81.3023	82.1036	72.1443
1251.42	86.25	98.6061	92.2932	75.1079	87.9496	78.8849	78.4268	76.6808	72.8717	82.8452	79.4087	77.5182
1254.61	89.973	100.09	87.9227	78.8849	86.6277	79.964	79.1333	75.296	79.7486	74.4508	75.3009	80.3219
1257.79	90.7554	92.2122	85.0899	79.6942	88.2194	83.3094	76.0716	71.5881	72.35	76.386	80.3244	81.9315
1260.96	86.4658	89.5953	89.5953	77.1313	84.1996	83.6061	72.7979	73.5984	71.8995	79.6287	79.775	81.9574
1264.13	86.0072	97.7698	92.7248	80.045	90	83.714	79.9812	75.5417	78.231	79.3149	84.4584	79.1796
1267.33	80.7464	102.113	96.0432	74.2446	85.1978	85.0629	72.3504	79.6962	79.3455	79.5502	79.2779	76.947
1270.51	86.5198	97.0683	90.3507	81.232	86.8165	85.7104	77.7673	75.9214	80.294	80.3609	78.5453	78.4787
1273.67	85.6025	100.576	88.8939	76.1061	89.9191	81.3939	73.6929	76.5915	74.6502	78.1119	78.2313	79.6729
1276.84	85.7644	103.327	100.98	81.1781	83.5252	84.0378	76.943	74.1345	77.1876	79.8902	83.1763	74.4808
1280.06	87.2482	94.3435	94.8831	77.3471	83.741	78.2914	77.0843	73.5984	73.5357	73.2479	82.1559	77.2066
1283.25	90.9442	100.279	88.786	75.2698	83.2014	86.6547	71.6203	75.8544	79.5352	76.4644	77.0277	75.2336
1286.42	83.0665	94.964	91.7536	80.9622	90.1079	81.9874	75.4357	74.7152	71.9232	79.1056	79.1209	82.4507
1289.6	88.9478	94.5863	86.1151	71.277	87.6529	80.2878	73.9284	80.5003	74.3419	77.3536	80.6907	78.946
1292.79	77.3741	90.1079	93.0486	80.7194	84.1996	84.0378	80.1696	80.0983	78.4444	76.4121	79.3825	76.2721
1295.97	88.6781	87.8147	90.7824	74.5144	86.8165	79.9101	83.8672	77.0605	76.5947	81.8253	87.8336	83.9823
1299.16	84.0108	99.6313	89.2716	76.8076	85.0899	85.009	78.3325	75.1843	80.6498	80.2824	78.7807	79.2056
1302.35	89.1906	94.0737	89.5953	81.5018	87.1673	86.7896	84.6208	80.0089	79.1321	85.931	79.0162	78.8422
1305.53	86.304	89.3255	93.6151	77.1043	90.4317	87.4101	78.2383	79.2942	75.4328	84.8065	80.9262	77.6739
1308.74	90.1349	97.6349	95.2338	75.4586	88.2734	81.6367	74.5643	74.6482	75.6936	77.249	72.9984	83.9045
1311.92	83.6061	93.3723	90.6745	79.6403	85.5486	85.4946	80.9232	80.612	79.3455	86.4801	85.2957	79.9325
1315.09	87.3022	87.1942	93.4263	80.5306	84.4155	83.6871	77.3434	73.8218	75.3853	75.9937	75.7718	77.5961
1318.28	83.4173	90.7824	87.2212	74.0558	90.6475	80.9892	74.3052	79.1155	82.2148	79.8117	81.8943	81.8795
1321.48	82.8777	96.8525	83.9568	76.6996	87.7068	85.1978	81.5356	77.5519	75.7173	77.0659	79.4087	81.4642
1324.67	85.9263	89.6763	96.8525	79.964	90.4586	77.5629	77.7438	75.1843	77.9701	78.5042	77.4202	82.3468
1327.84	91.1061	96.8255	91.9155	78.0755	89.0827	79.9101	77.3669	74.8269	75.3853	76.7782	79.9581	79.7767
1331.01	89.4065	95.3147	85.1978	74.3795	84.1996	84.9011	73.4338	76.3234	79.9383	78.6088	79.6965	72.7674
1334.23	84.6583	93.1025	93.2374	78.0755	83.6601	78.9928	81.7711	74.4695	73.6305	78.4519	78.6238	81.8536
1337.4	82.8237	95.4496	87.5719	81.0162	82.6619	86.0072	74.3523	77.9987	78.397	78.1904	80.4291	78.5826
1340.57	94.0198	96.0701	89.0018	77.0773	89.0827	88.2194	77.155	76.4128	68.2001	81.8253	79.9843	73.5462
1343.74	87.518	94.6133	89.7572	80.018	83.3094	79.0468	81.983	75.3183	72.5871	84.3358	75.1701	76.5057
1346.92	90.0809	93.2104	92.8597	80.5036	87.3831	83.1205	77.9086	76.2788	80.3889	78.9226	79.0424	88.3956
1350.08	91.295	91.8885	96.5558	81.259	86.0881	88.5162	75.1766	79.6069	71.0932	73.4048	82.7839	76.5836
1353.24	86.9784	95.045	96.0162	71.9784	85.5216	74.4335	79.1333	73.7547	76.1916	83.1851	75.6149	78.3749
1356.41	94.2356	90.8363	95.1259	75.3237	86.6007	82.2302	77.9793	74.3132	76.7607	75.5753	80.3244	80.3738
1359.6	88.3273	95.7734	92.9676	79.7212	90.1349	85.8183	70.7725	82.7563	77.069	79.5241	78.4929	81.1786
1362.77	88.5432	94.8561	90.1888	81.4748	81.4209	83.0396	75.9303	80.411	73.8914	77.6412	79.7488	79.7508
1365.95	79.4514	95.8004	86.223	79.3975	80.5036	77.9137	80.0518	75.9884	77.0927	80.5178	80.3244	77.622
1369.12	81.9335	97.0414	90.8363	77.8867	89.6493	86.1151	76.1658	74.1121	77.9464	77.9289	84.6677	79.3354
1372.28	83.9838	99.6853	85.6025	79.5594	89.8381	85.4137	77.838	75.8097	84.7996	79.3672	79.7227	78.1931
1375.44	87.2212	102.626	88.0845	77.8327	85.1439	81.0701	79.3217	70.4936	73.0377	80.4393	85.1648	78.9979
1378.62	87.6529	92.2122	96.259	75.8363	92.6978	86.4119	73.8577	72.7943	73.3934	84.3881	74.0973	82.217
1381.8	88.8129	97.1763	91.1061	75.6745	85.8723	79.964	77.5789	77.7976	76.0493	80.5701	81.3187	76.0903
1385	88.0845	96.3669	98.6601	75.027	89.5953	84.6043	73.9049	70.918	77.0453	78.7918	78.8854	70.1713
1388.17	88.759	93.3183	86.5468	83.2824	87.491	81.8525	76.2129	79.8749	78.9424	76.9874	68.943	76.999
1391.34	89.1637	98.5522	94.3435	74.8921	87.8417	82.527	77.6024	77.7306	80.9343	86.0356	74.4636	70.6646
1394.52	82.5809	85.8453	93.3993	79.6133	81.1781	79.8291	77.7673	76.9265	73.8203	75.2354	78.2836	77.622
1397.69	82.8507	94.1817	98.1745	75.5935	86.5737	83.1745	81.0645	76.2564	74.9822	75.5753	81.8158	80.6075
1400.86	87.4101	93.4532	95.6115	76.8885	86.0342	81.9604	79.1098	75.2289	75.5751	77.7458	74.7253	77.5961
1404.04	93.5612	87.4371	93.6421	75.7284	82.2032	82.7158	78.4974	77.1722	77.4721	76.8305	78.7807	86.2409
1407.22	88.2464	102.302	92.0504	83.6601	98.0396	85.2518	76.4484	69.5332	78.4681	85.591	80.5338	77.0768
1410.39	89.2986	94.4514	97.2302	75.1619	85.4137	83.9299	75.9067	76.1447	80.8869	76.1506	80.6122	74.2212
1413.56	82.9856	97.6619	84.4155	83.4173	83.4982	85.7644	78.8036	75.3406	73.5357	77.4582	80.3768	79.7767
1416.76	82.9586	97.6349	86.1421	74.3795	85.8993	82.6079	73.8342	77.753	79.6301	75.9153	83.9874	75.1558
1419.93	79.964	94.0198	96.0971	75.6205	83.4173	85.5486	77.9322	74.6035	70.4055	75.2354	80.1151	73.6241
1423.1	84.8741	89.8112	86.196	76.9155	86.3579	84.5504	71.3613	77.9093	76.1442	79.8902	76.8184	76.0903
1426.27	85.3597	93.2914	101.412	75.4586	86.277	79.7212	71.3377	79.9419	80.1992	79.4456	76.6353	82.7362
1429.47	87.5719	94.5594	92.8597	80.0719	88.3273	82.5809	69.8304	77.2392	74.9348	84.4404	83.8828	80.7632
1432.66	80.9083	95.8813	92.9137	83.9029	86.9245	83.8489	72.3269	76.6585	73.2037	80.9623	79.3302	87.3832
1435.82	80.4496	97.1493	96.6906	75.9442	87.5719	85.3597	80.2873	76.3234	78.2784	78.6088	77.0801	84.0602
1438.99	90.1888	96.3129	90.8903	80.1259	88.705	85.2518	79.6514	74.9386	74.7451	74.2416	83.2548	75.7529
1442.17	79.5594	100.98	86.1151	78.4263	81.4209	80.5036	77.4376	76.3681	81.2189	83.9697	78.6761	77.9595
1445.39	89.3255	101.169	96.4209	79.3165	80.9353	86.4388	79.5337	78.9591	75.1245	81.3285	82.4961	72.0665
1448.57	88.5432	97.7428	90.1888	72.3022	86.0072	81.6637	76.7546	76.2788	78.4444	76.4121	79.775	78.5306
1451.74	82.2302	88.759	86.9784	73.3543	84.8471	79.5054	80.4522	78.4901	73.6305	71.5481	86.0021	72.7934
1454.91	93.6151	92.1043	89.4065	74.6763	88.5162	83.0396	78.4503	77.887	73.4645	77.8504	89.0372	80.8411
1458.09	80.3957	98.6871	90.054	73.2194	88.4083	81.5558	75.6477	72.3922	82.0963	80.5439	72.763	76.298
1461.26	88.6781	93.6691	88.5432	77.455	83.4442	83.2824	72.0914	80.0089	78.3495	76.1245	74.7514	80.6854
1464.45	84.4424	97.9856	92.5899	74.6493	93.2374	82.7968	75.7654	81.6618	80.2229	76.046	76.8969	81.2565
1467.62	87.4371	93.4263	96.6097	75.5665	85.5755	81.4478	76.2836	79.3165	77.8041	77.5105	79.8012	76.7653
1470.78	89.3795	92.0234	94.3705	79.2896	85.7644	83.4442	75.7654	72.0125	79.7724	79.2887	80.1936	74.9221
1473.97	89.6223	102.464	91.6457	76.1331	85.4676	81.7176	78.0499	75.9214	81.1952	72.228	77.1847	80.1661
1477.14	82.2572	87.2752	88.0845	75.8363	92.9676	84.8201	77.4847	76.5468	77.733	76.7521	77.551	73.6501
1480.31	84.6853	96.6367	97.1763	83.6601	80.018	78.0486	76.6839	70.8063	77.1401	74.6862	85.4526	74.1952
1483.49	88.759	91.1331	85.1439	77.8058	85.7644	88.6781	80.4522	73.4644	73.7254	77.0659	90.0576	82.0353
1486.65	88.6241	93.2374	82.5809	78.9658	85.9263	82.6888	72.5389	81.2598	80.2466	81.0931	79.2779	76.4538
1489.84	90	94.3435	92.6978	77.4011	94.1007	81.0701	76.2129	73.5984	77.4721	79.0533	83.6735	78.5306
1493.02	85.8183	100.225	93.9658	79.5054	81.8525	83.3363	77.1079	76.2788	74.7688	75.1046	81.7896	86.0073
1496.22	88.4622	91.4029	89.7302	78.3183	82.2032	86.1691	75.7419	76.0331	74.0811	77.5628	81.8158	76.1423
1499.38	88.3004	93.3453	91.5108	74.5683	93.5342	84.7662	83.9849	78.1103	75.7648	76.1768	85.9759	73.3126
1502.54	87.1133	97.446	90.3777	72.2752	87.3831	83.3094	78.8036	76.1224	76.571	72.9603	75.4055	80.3479
1505.74	88.0036	84.3885	90.3237	78.6691	82.8237	88.3273	74.2817	72.7273	79.1321	80.1255	84.0921	75.026
1508.94	80.3147	93.6421	84.5234	82.8237	85.5486	74.2176	74.5878	77.5743	76.5947	84.022	84.1444	72.8712
1512.16	86.25	90.2968	95.7464	81.1781	88.0845	82.7698	79.4395	76.2341	78.3495	79.0533	80.5338	75.9086
1515.33	83.2824	93.3453	95.0989	75.4586	87.6529	84.3885	78.0028	81.3938	72.8717	80.5178	79.5918	75.675
1518.51	82.9586	97.2302	94.0468	79.5594	86.8705	88.1115	77.3434	74.0451	80.0332	81.25	78.7807	80.5815
1521.71	85.9263	91.9694	83.8759	78.9658	93.4532	82.0144	71.9265	70.0022	75.2905	71.3389	73.888	80.8152
1524.89	91.4838	90.1349	89.3795	77.6978	85.7914	81.4748	77.7673	70.8734	75.3142	78.1642	79.304	73.3126
1528.07	88.4353	90.4317	91.4029	75.5396	88.4622	89.5144	80.7584	78.4454	74.0811	76.386	84.3537	76.5317
1531.27	84.0917	91.9694	87.1942	80.2338	84.4964	83.741	78.5916	75.5417	71.7335	76.046	81.6327	77.3105
1534.44	82.554	94.2896	89.1097	76.6187	83.2014	86.3579	78.1677	75.2736	70.5004	76.046	83.8566	76.8951
1537.61	87.6799	98.3094	88.9748	78.2914	87.8957	90.9712	73.2219	77.1275	76.3339	79.8902	81.0047	78.6085
1540.8	90.054	94.2626	89.1906	83.0935	82.527	75.6745	80.6642	75.5417	74.2708	76.5429	80.089	78.5826
1544	82.9856	94.0737	93.3453	78.2644	92.7788	79.9371	74.1639	77.1499	81.3849	83.2636	78.4929	75.0779
1547.17	85.009	90.8094	89.973	75.3237	88.1115	82.9317	77.0608	78.9815	74.5791	82.2437	78.5453	82.5286
1550.34	83.3094	86.0072	92.4011	84.8201	81.1511	83.9568	74.6114	80.746	73.6543	79.1056	80.6384	77.2845
1553.52	89.946	96.5827	83.8759	79.1817	88.2464	85.5486	72.5624	83.5604	79.6064	82.8975	77.0016	78.5566
1556.7	88.6511	95.2068	96.3399	78.0216	82.9317	81.3939	78.1677	76.6361	75.9308	78.3996	75.7457	76.5576
1559.88	92.6439	91.3489	87.3831	84.0647	88.8399	81.5558	74.0697	79.2718	78.3733	80.4393	75.5887	79.7508
1563.07	89.8651	96.3129	95.018	76.7266	81.7716	83.2284	73.5987	77.2616	75.3379	73.9801	78.1266	78.5566
1566.23	85.1978	94.2896	93.1025	72.7608	88.6781	83.4442	75.6948	72.3252	80.3652	79.681	75.8765	78.8162
1569.41	84.0917	97.5	92.1853	75.5935	90.9982	87.518	72.7037	75.296	80.7683	77.8243	74.6206	72.4039
1572.57	84.4424	91.8076	94.8831	71.4658	89.8381	84.3615	74.635	73.5761	73.9862	73.4048	80.9001	75.1817
1575.78	85.1709	89.7032	93.9388	77.5629	85.7644	85.1978	79.4395	79.3388	70.0972	76.1245	81.1617	83.8266
1578.95	88.4622	92.7518	88.4892	85.2788	87.9227	86.6007	71.0551	70.6947	81.4323	81.1454	76.3998	79.2575
1582.13	83.0935	90.6205	88.1115	81.0971	88.0306	78.3993	81.983	71.1414	78.065	74.5554	71.6902	76.6355
1585.3	86.5468	92.509	90.2698	80.2878	88.3273	82.4191	77.5553	77.4179	73.7728	83.0544	78.9901	80.1402
1588.47	81.1241	92.6978	82.3921	79.0198	88.0306	81.0432	77.9086	79.9196	73.7017	80.7531	79.147	82.9958
1591.64	87.1133	95.7194	94.8831	74.7572	90.4317	79.5863	73.8106	79.8302	71.4252	74.7908	78.9639	79.9325
1594.82	87.8147	92.5899	91.9964	77.2392	90.3237	83.6871	75.2708	74.4918	73.3223	75.2877	76.2951	77.5441
1598.02	86.223	91.6457	94.0468	81.3129	81.3939	85.6565	79.7927	72.906	73.9862	80.5439	77.3155	74.9221
1601.19	85.7104	88.9478	90.1079	78.723	84.9011	82.0953	73.952	80.545	79.4878	83.3944	82.5746	79.4393
1604.36	86.8705	97.0683	92.2932	72.0863	86.4388	84.5504	71.9501	75.363	77.0927	79.5764	77.0801	80.1402
1607.52	84.955	95.5036	88.3273	77.8058	84.0647	77.6978	71.4319	75.7874	77.7567	83.0282	74.516	79.9585
1610.71	86.277	100.737	90.7014	79.3435	86.8165	85.8453	79.5808	73.7771	75.7885	80.3609	79.2517	75.7009
1613.89	87.4101	90.2428	94.3975	72.9496	89.7572	77.6978	72.0443	76.6361	78.5155	78.7657	75.5625	76.4798
1617.06	88.2194	92.509	88.3273	81.0432	81.6637	83.6871	76.0716	78.6464	75.8122	75.2877	82.6531	81.3603
1620.24	86.7356	97.6349	92.1583	77.4011	87.8147	85.8723	73.1276	75.7874	72.3737	78.8441	74.8823	78.8941
1623.44	86.4928	90.4317	95.7464	80.7464	88.4083	86.4928	76.7546	71.5211	77.6381	76.0722	80.6646	75.4673
1626.59	82.5	96.6906	94.8561	74.2986	87.8417	86.0072	77.0372	71.7221	74.3894	78.8703	76.0597	76.2201
1629.77	79.3165	91.0522	86.0342	82.8507	85.2248	78.8849	76.8959	72.6603	75.1008	77.6674	80.1675	79.8546
1632.94	85.8453	92.3741	94.3975	78.723	80.7734	83.0935	76.2365	75.832	74.4605	76.8828	72.6583	73.1568
1636.13	82.9586	85.8993	89.4335	75.8094	82.2302	91.295	76.2836	72.7049	76.4762	79.5764	80.2198	76.6355
1639.3	82.6079	99.8741	83.768	78.4802	87.3022	84.3345	72.7979	71.2754	79.1558	75	77.237	73.4683
1642.48	84.2536	94.964	84.1996	79.4514	92.1313	81.6906	79.0391	77.82	72.1603	78.2165	79.5657	80.6594
1645.66	86.0342	89.0558	93.9119	76.241	91.0791	83.0935	76.6839	70.0469	78.1124	76.2552	76.7661	82.8401
1648.83	85.1709	92.455	96.7176	71.5198	86.6817	83.5791	73.3396	78.9145	71.3303	73.3525	79.4349	75.3634
1652.03	79.3975	86.4658	94.8831	77.2662	84.955	78.5612	76.1658	71.8562	76.0493	75.5492	80.1936	77.5961
1655.21	87.6259	99.3885	84.5504	77.7788	87.1673	79.0198	73.8106	75.698	74.4605	72.8818	77.708	80.6075
1658.38	90.5126	91.3219	92.2122	74.2176	83.2284	85.009	74.7056	73.8218	78.3733	72.8818	81.4495	71.0021
1661.55	82.6349	91.3759	91.9155	75.1349	83.3363	82.0414	77.2492	76.3458	73.4645	76.7259	76.6353	77.9595
1664.72	89.9191	98.3903	92.8327	74.6493	86.9514	82.0414	75.2473	76.9265	71.52	78.1642	76.426	75.8827
1667.89	81.8525	96.259	86.7086	70.8723	87.3561	81.232	75.365	71.7668	72.3737	83.7866	81.214	79.4393
1671.08	94.5324	87.9496	90	74.5683	87.2752	84.8471	80.4051	68.2823	74.2234	79.864	75.3794	80.893
1674.26	88.6781	92.7788	90.2698	77.7248	80.5845	85.8183	76.6133	76.8595	71.9469	73.9278	75.2747	71.1578
1677.42	87.464	92.7788	89.4065	74.4604	80.7734	88.1924	78.8978	79.3165	77.6381	74.9738	72.2397	75.3634
1680.62	87.7338	92.7248	92.455	79.3705	84.1996	77.2662	75.0118	76.2564	79.4641	77.0659	81.3972	78.1931
1683.8	83.9029	98.2554	81.1241	80.5036	85.3597	84.6853	75.7654	78.289	71.3066	79.6287	71.5332	73.3126
1686.99	85.4137	92.9676	86.1151	81.232	89.5414	82.2032	74.8234	74.5142	70.7375	77.6412	76.2428	77.3105
1690.17	87.3022	91.1601	96.6367	78.5612	89.973	78.2374	74.211	79.0708	75.9782	77.1705	81.8943	73.1828
1693.35	91.0252	99.7122	89.2446	82.554	86.0612	81.3939	74.3523	79.4282	79.7249	77.9812	78.9116	77.9076
1696.51	89.8921	97.9317	89.3525	72.0054	86.0342	79.964	73.2219	75.4523	73.8914	78.5303	81.7373	76.0903
1699.69	81.7176	86.6277	91.5108	74.5953	82.1493	83.741	75.3886	80.1653	74.4131	77.7197	79.0686	76.6615
1702.86	89.7032	93.8579	94.1007	79.2086	87.7878	85.6295	79.5101	71.1637	79.0372	79.4195	76.1905	79.1796
1706.03	81.3939	93.3993	88.2464	82.5	88.1115	78.0755	79.1333	75.43	73.2037	71.0513	75.0654	72.9232
1709.22	93.2374	94.5863	90.9173	75.7284	87.8957	84.0378	75.7183	74.5812	74.6739	79.4979	72.2135	77.4403
1712.4	86.1151	91.5647	94.2626	69.5773	86.0342	78.696	73.0805	74.0004	79.9146	78.2165	73.7572	71.3396
1715.57	80.018	94.9101	92.2932	75.8094	84.8741	83.2824	70.9138	69.9576	72.8243	75.4184	75.0654	79.1277
1718.75	82.2302	92.1313	88.759	75.4856	88.1924	81.8525	76.9195	74.5812	70.8323	77.9027	75.1962	78.6604
1721.91	90.7284	92.3741	88.2194	81.9065	86.9784	80.018	76.5897	77.6413	76.8319	70.8944	77.0539	74.325
1725.09	83.9568	90.7284	88.8939	76.3219	85.0629	89.973	73.2454	72.6603	70.7375	76.7521	71.6641	75.2077
1728.26	81.0432	90.3237	90.6205	75.3507	86.1421	80.8004	73.6458	74.2908	73.5357	79.1056	79.5918	76.5576
1731.44	88.4083	87.8147	94.6942	80.8813	86.8165	83.6601	73.0334	74.6705	74.6977	81.8253	85.505	76.0125
1734.61	90.3507	96.0701	91.6187	76.268	81.8525	81.9604	79.9105	75.765	70.9746	76.2291	83.8305	75.2856
1737.81	87.8687	92.5899	91.1061	86.304	89.0288	82.446	70.4192	75.9884	70.2158	73.6663	76.6614	81.2565
1740.97	84.6583	96.9604	90.7284	73.8669	85.4676	88.3813	73.2454	82.7563	74.2708	77.955	78.3359	74.325
1744.14	86.6547	99.5234	92.1853	84.0647	82.4191	88.2734	74.5407	82.5106	73.18	74.1893	77.7865	81.1526
1747.31	84.1996	103.57	89.1637	70.5755	87.7608	79.5863	75.9538	77.1499	70.6901	74.1109	74.9084	77.2845
1750.47	88.4353	91.0791	85.1709	85.009	86.4119	85.7374	78.5445	76.4574	79.2507	75.1569	82.967	78.3749
1753.63	80.9083	95.9083	96.8525	80.2338	84.2536	78.9928	73.952	71.4988	77.5196	79.4195	81.8681	78.297
1756.84	84.2806	91.295	90.9173	80.018	88.4353	78.4532	76.3778	74.8269	71.686	79.4195	76.2166	75.7269
1760.02	91.241	93.0216	88.4083	74.4874	90.2428	85.5755	78.8036	69.5108	70.3581	74.2155	80.2983	78.9979
1763.18	83.4173	96.6637	93.5342	74.2986	89.6223	91.4299	78.3797	76.4798	73.7017	72.1496	79.147	73.6241
1766.35	86.6817	96.9335	92.6439	78.0486	87.0594	88.5432	73.6929	69.2428	70.6664	74.1109	84.2229	75.0519
1769.52	87.491	90.9982	89.1637	79.3435	86.8165	81.5558	70.4663	68.7291	70.9272	76.8044	83.281	74.3769
1772.72	84.9281	93.3723	89.2176	75.6475	83.4712	86.5468	76.9666	77.954	72.6346	75.8107	70.4605	75.2856
1775.9	85.036	90.4317	89.1097	75.3777	85.0899	83.768	67.3811	74.2238	76.4762	80.5962	78.5976	74.3769
1779.08	91.0252	88.8399	90.6205	74.946	83.1745	74.2446	74.2581	75.363	76.6184	75.4707	76.7923	74.2731
1782.25	86.9514	93.2644	96.9335	79.2086	89.5683	86.0881	78.992	76.6361	72.6109	78.8964	78.2313	74.3769
1785.42	81.1511	91.8076	88.5162	81.7716	88.1655	89.0558	71.1258	77.887	72.8006	76.5167	75.0392	83.1776
1788.59	82.3381	97.9047	87.3291	70.8453	85.5216	84.6583	70.796	81.0141	73.4645	77.0921	72.8414	72.7674
1791.84	86.3849	92.8327	92.509	74.1097	87.8147	82.473	72.4918	69.6225	76.8082	78.1119	74.9869	81.9315
1795.02	87.8957	99.955	93.4532	80.1259	87.1133	81.7716	71.8323	69.8012	73.6068	75.4446	75.798	77.7259
1798.2	89.5414	95.045	91.6457	75.3507	88.4353	81.0701	76.2365	79.0038	77.4959	74.7385	75.6934	79.7248

## Sheet: Figure 1-Fig sup 3-Panel G
Time (s)	AB-apm/AB-Cy5 77N0-Cy3 atp			AB-apm/AB-Cy5 77N0-Cy3 amp-pnp
0	93.2343	92.7536	81.994	78.3099	79.808	88.0198
3.655	88.2838	91.0024	86.2202	78.365	91.6408	90.5496
6.849	88.4213	93.2669	90.9524	89.0173	90.0875	95.6383
10.026	84.1584	90.8213	92.2917	84.3105	85.7667	92.4687
13.192	89.0814	90.5495	86.6964	86.9805	89.6639	99.4475
16.379	91.8042	92.7536	88.2738	80.3468	93.0811	91.451
19.554	91.0891	92.4215	88.8393	83.4021	83.0839	92.0326
22.736	95.297	86.8357	84.0179	81.9433	87.8283	90.1134
25.932	90.1265	78.3213	93.6905	84.4481	83.2533	89.2701
29.14	88.0913	87.3792	100	87.008	88.3649	82.0006
32.339	90.7591	94.3841	85.3274	82.4663	86.1621	93.69
35.531	79.2904	100	89.4048	84.3931	82.5473	92.3524
38.746	86.3586	97.192	87.619	92.5957	91.9514	97.7319
41.92	87.1287	90.7911	81.756	83.5122	89.4663	87.6708
45.099	93.3168	86.5338	86.994	86.0171	88.7602	96.0454
48.294	84.6535	92.9046	89.7619	87.1181	90.6806	92.9049
51.518	82.5358	94.9275	88.3929	86.6502	89.7204	90.0552
54.701	87.8163	89.4928	83.0655	82.136	90.5112	94.5915
57.921	93.7294	96.6486	82.381	88.0264	91.0477	89.0084
61.118	90.1815	92.1498	89.8214	85.9345	83.7052	88.8049
64.312	86.1936	94.0519	95.119	97.0823	87.2917	99.7092
67.501	90.9241	94.9577	85.9524	86.0721	88.7602	90.1425
70.67	90.7041	85.2959	86.9345	90.0083	88.026	86.5368
73.866	86.6062	90.7307	89.1964	89.6229	91.9514	100
77.045	91.2266	86.413	82.9167	81.1175	81.5589	88.7758
80.23	94.692	86.4432	82.381	87.5585	93.0528	88.863
83.394	89.5765	87.349	86.9048	88.6045	86.4727	92.8468
86.565	86.6337	88.0737	81.6369	88.5769	90.0028	89.212
89.75	92.4367	96.4976	81.7857	90.779	95.9334	86.7403
92.96	87.7063	90.5797	83.006	88.7146	96.3005	81.2445
96.147	89.0539	92.3913	82.9167	94.0545	87.0093	91.3347
99.322	94.0594	95.5012	86.8155	89.4027	84.5241	92.178
102.5	87.7063	90.3986	83.3631	84.8059	90.6241	84.0942
105.693	90.7866	89.6739	86.9643	90.5863	87.0376	90.4623
108.883	92.5193	90.6099	83.4226	94.9078	84.8066	88.7467
112.094	82.7008	90.8213	86.6964	89.7055	87.9977	89.4737
115.266	92.5193	89.6739	78.8393	88.5494	82.9992	92.207
118.432	89.4939	81.5217	84.9107	94.8527	91.4713	86.7403
121.612	85.2035	91.4251	75.119	91.2744	88.2237	90.0552
124.821	82.4257	90.1268	87.0238	82.3562	95.538	93.2248
128.015	86.5237	89.9758	79.7321	86.54	97.4866	84.4432
131.203	86.6062	89.221	90.6845	92.7608	85.3149	88.0198
134.385	92.7393	97.0411	84.1964	86.9254	88.026	86.5949
137.671	85.4235	93.2971	87.1131	87.6961	88.7885	91.0148
140.87	85.9186	87.4396	75.6845	92.7333	88.1389	90.1425
144.058	90.2365	88.2548	81.369	89.21	92.2621	88.5141
147.271	89.714	98.1582	80.0595	93.4214	92.6857	90.3751
150.498	92.0242	90.5193	91.4881	89.1825	93.9283	91.073
153.686	87.9538	94.2633	78.5714	88.109	93.0528	85.6935
156.873	84.0484	90.6703	84.7024	88.4393	88.9014	86.4786
160.068	92.3542	90.9722	83.6905	92.7608	93.9283	86.1878
163.235	87.7888	95.1087	82.381	89.8706	87.207	87.002
166.42	90.8691	84.1486	79.494	90.311	95.8486	84.0942
169.59	91.9417	90.2778	81.2798	84.2279	88.4778	90.9276
172.789	93.6744	86.6546	80.3274	87.4759	91.076	85.8098
176.005	84.0759	98.1884	77.1131	83.4572	90.3417	88.1652
179.179	81.4081	95.4106	89.1071	98.0457	88.4496	88.2815
182.348	92.6568	92.1196	80	86.5951	87.5741	95.0858
185.548	89.7415	85.8998	81.4583	88.0539	91.4431	86.1878
188.743	88.3388	88.9795	78.9286	92.0176	93.2505	91.9744
191.929	84.6535	99.4263	85.119	94.7426	91.8949	90.2297
195.095	87.7063	89.3116	78.1845	92.403	90.0311	82.9311
198.284	88.2288	90.7307	86.3393	100	93.7023	86.624
201.501	86.1111	91.244	82.9464	85.439	87.913	90.1425
204.712	100	84.994	78.0655	86.2097	89.7769	87.6127
207.895	93.6469	92.8442	75.4167	93.8343	84.7501	86.3042
211.112	87.2937	88.285	84.1369	83.292	100	93.1085
214.284	89.714	87.5604	89.2857	91.5222	96.8935	78.5112
217.51	88.1738	97.9771	84.4345	91.7974	88.2801	88.2233
220.678	80.4455	90.0362	80.7143	93.5866	86.2751	82.2332
223.848	91.3641	88.8889	81.2798	89.6504	91.1324	93.1666
227.06	80.6656	86.1111	88.6012	91.1093	85.7103	82.2041
230.292	86.7712	85.7488	88.2143	84.7784	89.6639	84.4141
233.453	87.8163	87.7717	86.9048	95.2656	94.2672	83.28
236.632	88.7514	90.006	81.6667	85.0812	92.0926	83.0183
239.794	86.5512	95.471	79.4048	84.1178	90.0028	84.9956
243.007	91.0616	90.7307	86.994	90.6689	90.7371	89.6191
246.193	79.7855	80.465	79.1667	91.5222	94.4648	84.8212
249.388	87.5688	93.9915	86.875	87.2557	86.7552	89.8517
252.559	84.9835	91.093	77.2619	94.1921	94.5496	89.9389
255.766	88.5039	79.8007	79.0179	86.1547	87.3764	82.0297
259.007	87.7888	89.4324	79.6131	92.5957	89.4663	90.695
262.235	88.6689	91.1232	80.7143	89.9532	84.6371	87.3801
265.442	89.2189	87.9831	77.8274	91.2194	85.9644	88.2815
268.662	91.2266	86.1413	81.9048	92.9535	94.126	82.1169
271.82	93.4818	92.2705	81.4583	89.7055	90.5959	94.039
275.008	84.5435	91.2742	90.2679	87.2557	91.3584	86.6531
278.21	90.2915	91.1534	74.5833	91.4121	92.4315	83.1637
281.455	87.2112	93.4481	78.75	90.5312	92.375	83.2509
284.656	89.2464	88.3756	86.1607	90.0358	86.3315	87.1474
287.858	91.1716	87.9227	84.3452	92.1552	89.2968	89.4155
291.049	84.3509	96.0145	86.5774	85.7969	91.0477	82.6985
294.215	89.3289	91.4855	81.5476	82.6865	86.8964	94.9985
297.403	88.6139	92.4215	84.7321	82.659	89.9463	89.4446
300.621	84.846	92.2705	79.256	91.3295	90.85	88.2233
303.791	86.1936	80.2234	80.8631	91.6598	89.7204	80.0523
306.986	91.1441	87.8623	85.625	87.8337	90.85	92.0907
310.164	84.3784	87.5	85.9524	85.6592	94.8037	85.9261
313.33	85.5611	91.6365	82.5298	90.1459	90.6524	87.7581
316.515	89.659	87.1981	85.8631	94.7977	94.3801	90.7531
319.706	85.6436	83.0012	75.3274	89.0173	86.9528	82.902
322.894	88.2563	91.7271	80.119	84.4206	85.3714	92.4687
326.099	85.4235	95.3502	83.1548	87.6411	91.4149	94.2425
329.356	79.7855	91.093	82.4405	89.21	90.3417	84.007
332.558	86.4136	83.756	77.5298	92.4305	89.0144	84.2687
335.772	89.934	93.75	78.1548	88.3292	92.375	87.5545
338.972	92.0517	91.0326	77.381	91.1093	87.0376	80.1977
342.188	85.066	92.1196	82.7381	86.7052	86.1903	82.4949
345.383	91.4741	88.285	79.4345	90.7514	83.9876	79.1218
348.583	88.9714	89.221	80.2381	89.21	91.3866	84.8502
351.807	90.6216	85.6582	83.75	81.6405	87.7718	87.2056
354.988	83.4708	82.1256	77.6786	93.3664	91.3866	90.5787
358.191	91.3091	88.2246	71.369	89.9807	91.1607	88.107
361.367	81.4356	88.4662	81.9643	83.9802	95.3121	82.3204
364.548	84.8735	88.3454	81.0417	89.1825	84.27	83.3382
367.732	85.286	88.9493	76.25	95.2381	92.6574	85.2573
370.922	89.3839	88.3756	78.244	91.9626	83.7052	84.8793
374.137	80.088	85.93	83.0952	90.1459	94.0695	86.3623
377.36	92.9043	91.9082	81.6369	87.7512	89.1274	82.4949
380.552	82.5633	87.8321	74.3452	96.9447	83.4792	84.9956
383.801	85.0385	93.599	77.0238	90.5312	89.0991	89.4737
386.975	80.9131	88.3454	82.4107	93.5866	88.1107	84.8793
390.217	81.2156	89.6437	78.244	88.0815	85.3431	81.9424
393.389	91.3091	78.6232	79.7321	89.0173	91.2737	95.2603
396.625	90.7041	84.2089	78.8988	82.9342	89.9463	86.5949
399.827	82.2607	86.2319	83.1548	90.3936	91.2454	84.2105
403.035	88.7514	88.1944	77.619	96.2565	92.7422	88.3396
406.22	81.1056	90.4891	82.8571	90.9441	93.307	79.6162
409.406	89.5215	85.2657	85	89.6229	95.0014	86.0715
412.615	81.8757	89.3418	74.2857	90.311	90.4829	89.3283
415.791	87.8163	92.2403	78.6607	83.6224	85.6538	81.1282
418.977	92.6018	83.9674	83.7202	91.8249	95.5662	87.9616
422.153	86.5512	93.5386	72.8571	86.6777	93.2505	85.0829
425.358	84.846	90.7609	70.6845	87.8337	86.3315	87.9035
428.56	89.604	86.2923	78.4524	89.4027	87.2352	84.2687
431.767	92.2442	87.3188	75.9524	92.403	90.7936	87.729
434.947	87.7338	88.4964	85.2976	86.2373	91.4149	82.6403
438.133	84.2684	93.5386	83.1548	91.5222	86.7269	81.797
441.31	85.9736	85.8696	79.8214	91.8249	91.6973	90.2588
444.493	91.2266	88.6171	82.2619	89.9807	85.9079	82.5821
447.709	90.7316	82.0954	77.2619	82.3011	87.8848	89.59
450.879	83.6359	84.9336	77.1726	89.4302	91.9797	84.4722
454.117	86.1111	85.9903	79.7917	90.4762	95.6509	85.7517
457.292	90.7316	93.3273	82.1131	93.3939	91.6973	82.2041
460.478	79.703	87.8925	86.5476	91.4671	91.5843	85.8971
463.649	82.6458	90.3986	78.9583	92.7058	84.9478	86.7694
466.846	83.1408	90.0664	73.9286	87.063	85.6255	96.8596
470.012	89.1914	83.7258	81.3988	87.6961	89.8899	84.007
473.186	88.3113	84.8732	72.6786	86.6502	90.963	82.1169
476.387	90.5391	83.4239	77.2024	85.7693	93.1375	83.0183
479.549	86.8537	92.7536	80.2381	87.4759	86.5292	83.0183
482.723	87.1287	93.2367	79.881	93.4765	83.1121	85.1992
485.923	82.7558	87.651	79.3452	86.6226	92.8269	84.6467
489.121	86.0286	82.1558	81.0417	88.3567	87.6306	86.8857
492.308	80.143	98.3696	83.0952	91.6873	91.7537	83.9779
495.511	81.8482	86.3829	78.75	89.1825	89.6639	85.112
498.678	84.0484	93.7198	81.875	92.0451	83.2533	87.3801
501.859	81.2156	86.8357	75.8929	87.3933	88.5343	84.6467
505.049	87.8163	82.2464	76.8452	88.9623	92.7422	82.2914
508.263	83.1683	92.2101	76.4583	89.8706	89.4663	87.1765
511.494	83.1683	83.122	80.625	91.7424	88.9014	87.5545
514.668	79.8405	78.0797	75.2976	93.2012	91.1607	86.6822
517.928	83.1408	84.8732	84.2857	93.559	93.4199	86.6531
521.101	89.0814	83.6655	77.5595	86.2373	91.669	85.7517
524.268	80.8306	81.2802	71.6369	86.9529	88.6473	83.9779
527.455	87.6238	84.4505	79.256	93.9994	91.3301	82.2332
530.62	82.6733	87.1981	79.8512	89.2926	94.2672	87.4673
533.825	86.1936	85.5072	75.9226	93.4765	88.5061	88.834
537.002	86.2486	86.5942	78.3333	89.4853	91.0477	87.8162
540.221	80.8581	88.8285	76.8452	88.4668	84.1288	82.9311
543.451	79.8405	88.3454	77.0536	90.2009	91.782	88.0779
546.644	88.4488	86.4432	80.5952	92.4855	84.8066	84.385
549.857	80.9956	89.7343	78.4226	89.2375	89.8899	86.1297
553.059	88.3113	86.1413	86.4583	85.962	88.1672	86.1588
556.253	85.9461	83.2428	81.131	86.9529	90.85	79.936
559.49	84.7635	85.1751	79.1964	92.7058	88.0542	86.8276
562.697	83.3608	85.4469	70.119	85.1638	90.37	85.6063
565.874	88.0913	81.6425	78.2738	88.8797	89.0709	83.629
569.042	88.7514	85.93	75.9821	93.6691	92.9681	84.9956
572.245	88.2013	86.8357	77.0833	85.1087	85.9644	89.1247
575.418	81.6832	84.843	75.4167	89.6504	91.0477	80.9828
578.634	85.8086	88.8889	83.75	82.4938	82.2367	86.5949
581.824	85.6711	77.8382	72.9762	84.2554	86.3033	85.3446
585.001	85.396	75.6039	76.3095	88.1641	89.8051	85.6354
588.198	79.0704	87.3792	76.1905	88.9348	90.3982	84.5013
591.383	86.7987	83.0314	76.0714	90.1184	90.4264	89.0084
594.616	85.231	84.2693	72.3512	90.5863	89.2686	85.0247
597.823	87.3212	83.3937	71.131	85.5216	80.7964	89.6482
601	85.9736	83.2428	77.4405	94.4123	88.5908	83.3963
604.194	79.538	94.2935	79.5238	89.733	96.7523	80.4885
607.365	84.1309	90.5797	72.4405	92.8434	89.438	84.8793
610.552	88.1463	89.0097	79.6131	89.678	90.0028	89.1538
613.751	79.6205	87.0773	80.625	83.4021	87.913	80.3722
616.932	84.791	88.0435	73.3333	83.76	91.9232	80.8665
620.11	82.8383	82.3671	76.4583	93.3664	89.325	82.2332
623.315	81.9307	91.9686	80.5655	90.5863	83.4792	86.6822
626.499	79.0704	83.907	79.3155	84.3931	92.7422	87.5545
629.689	80.143	88.4964	77.381	85.384	87.9413	83.1928
632.886	81.9307	82.6691	88.3631	89.21	84.976	79.4417
636.053	82.7833	83.6051	77.3214	91.1919	95.4533	87.351
639.225	82.3157	82.7597	76.6369	88.1365	88.3366	80.4594
642.491	81.0781	82.4879	75.5357	89.2926	85.1737	82.5821
645.67	83.8284	81.0688	72.0833	87.531	93.8153	79.2382
648.857	87.0737	85.2355	74.0476	91.0818	87.4894	83.9488
652.041	80.4455	84.9638	79.9405	96.5043	82.8015	87.351
655.294	87.4037	85.4771	78.8988	87.9714	87.6589	82.6403
658.477	81.1606	88.7379	77.9464	86.5951	88.7885	86.4786
661.662	76.8702	85.2959	76.1607	94.1921	89.438	87.2637
664.878	84.1034	87.0773	77.2917	85.907	91.4996	82.4077
668.061	76.5127	83.6957	81.25	89.21	90.7936	81.9424
671.245	86.2486	81.7633	76.6964	91.1643	84.2417	86.6822
674.441	85.8086	84.5109	73.6607	92.1828	84.8066	82.9311
677.627	84.956	82.7597	73.4821	87.531	92.8269	85.6935
680.81	85.7261	86.413	78.9881	80.8973	84.6653	82.6112
684.013	77.6678	88.8889	76.0119	94.1921	91.7537	84.7921
687.219	86.1936	85.3563	78.4821	85.1363	88.3366	81.0119
690.417	82.2882	88.0435	74.1369	89.733	92.488	88.6595
693.584	79.8955	80.3744	76.6964	80.5395	87.3764	81.1282
696.778	82.0407	83.122	70.9821	84.5307	88.3649	84.6758
699.943	85.5336	75.7548	74.4643	91.4396	85.3996	83.4836
703.14	78.0528	85.5676	75.625	86.9529	83.7334	82.8729
706.321	84.901	87.9529	72.4702	89.3201	92.601	81.5935
709.512	81.3806	80.314	78.75	84.6408	81.9543	81.0119
712.695	82.5908	78.8647	76.131	88.3567	85.4561	81.419
715.876	83.3883	83.9372	74.375	91.6047	91.7255	78.6566
719.049	84.1034	90.0664	76.1607	85.5767	90.7936	82.3495
722.23	90.8966	88.1341	81.131	97.853	88.1954	92.1198
725.467	78.1628	73.7923	72.4702	94.3848	86.6987	85.8971
728.653	81.7107	86.7452	79.8512	85.5216	90.7936	83.2219
731.847	85.8086	80.8575	75.8929	85.5767	89.1838	81.0119
735.083	84.571	87.5302	75.3571	83.7325	89.9181	86.3623
738.3	79.0429	86.8357	79.0774	89.2926	86.501	84.5304
741.487	84.1584	86.8961	74.256	85.4666	82.7732	81.8261
744.657	81.7107	93.3273	76.994	87.1456	87.9977	86.4495
747.861	81.5732	87.8019	79.0476	85.9895	91.782	79.6452
751.046	82.9208	90.7005	75.5952	84.5582	86.7269	83.7162
754.235	87.1562	90.2476	73.5417	91.6873	88.1107	83.0474
757.41	83.6909	85.6582	75.5655	93.6416	81.926	78.3367
760.613	75.1925	87.8925	75.0595	94.3298	86.1056	83.2509
763.772	80.9131	79.4686	80.2679	83.0443	86.4727	85.49
766.956	76.9527	86.6848	73.869	88.6045	79.1867	89.2411
770.126	81.5457	79.0761	80.7738	90.6138	86.8964	76.4176
773.323	83.4433	78.1703	72.0238	91.357	88.1672	88.1361
776.545	82.8383	84.6316	73.8095	92.7608	85.5126	75.4871
779.725	79.2079	86.3829	72.9464	87.2832	94.6625	79.1218
782.894	88.0088	77.1135	72.5893	88.0264	92.0926	86.3042
786.159	87.8163	83.6051	76.9643	85.2464	87.1505	87.8162
789.325	80.0055	80.7669	79.7619	92.5681	84.1288	80.5757
792.494	84.1034	86.9263	73.1548	89.4302	91.8385	78.075
795.704	84.2959	74.3056	73.1548	86.6777	89.1838	88.0489
798.884	80.9131	84.2995	76.6369	85.1363	87.0376	83.3382
802.052	81.1606	88.1341	71.2202	85.2464	80.2598	86.1297
805.269	85.0935	81.7935	73.869	88.1641	86.7834	84.2978
808.468	86.0286	85.4771	72.4405	92.3479	85.9079	87.002
811.66	79.8955	79.378	71.4286	89.3476	84.5806	82.0587
814.853	80.1155	85.6582	71.4583	90.5863	85.2866	83.2219
818.05	75.44	85.5374	67.6786	85.2188	87.6024	77.0573
821.216	82.3157	83.8768	75.1786	85.2739	86.4445	85.7226
824.46	86.7987	79.8611	81.6964	91.8525	92.9963	87.1183
827.652	85.9736	84.6316	74.3452	85.2188	91.0195	84.6758
830.813	81.1606	79.7403	75.119	92.1552	83.6769	80.9538
833.99	85.0385	84.6316	74.7024	91.5222	90.5394	86.2169
837.173	84.4059	83.4239	74.0476	87.063	87.4329	87.2347
840.346	74.0099	78.1401	77.0238	96.3391	87.32	89.212
843.553	81.6557	88.1944	73.2143	92.8434	85.3714	83.5999
846.718	83.1683	90.8816	70.4762	89.155	88.7038	84.5013
849.892	83.4708	84.058	74.6131	90.8065	90.5676	86.4495
853.079	81.1606	80.2838	76.3393	84.338	88.1107	87.0602
856.249	84.516	84.2391	80.3869	92.458	86.0491	85.7808
859.462	78.7679	83.907	80.3274	89.6229	84.1288	84.5304
862.631	81.0231	90.3382	80.4464	86.0996	84.4112	85.868
865.826	84.9835	82.5181	76.994	90.5037	85.9079	88.0198
869.027	79.2629	83.756	78.3631	96.0639	83.6769	82.7275
872.231	81.2706	85.8394	72.5	90.834	81.9543	84.6176
875.393	79.8955	89.6739	70.3571	91.0818	80.4857	80.663
878.628	74.4224	80.0121	76.9345	85.9895	82.8297	86.7694
881.813	81.9857	78.4118	71.4583	86.54	85.2584	84.3559
884.992	80.3355	86.9867	80.744	90.7239	86.4445	79.6162
888.159	86.4961	79.3478	72.9167	93.7517	83.564	85.8971
891.349	79.593	81.6123	74.8214	82.8792	86.4727	77.5516
894.533	79.7855	79.6498	78.869	89.5679	80.2033	81.5644
897.759	82.0132	78.8949	78.0357	89.4027	90.0028	82.2623
900.934	81.1331	82.2162	76.7857	89.6229	86.9246	75.7488
904.119	79.538	76.8116	72.2917	86.1547	86.6987	80.5757
907.304	84.1309	84.6618	76.131	87.6961	83.564	84.9084
910.465	88.6139	72.1316	79.9107	97.1649	92.7422	80.9828
913.659	81.8757	86.3527	73.4524	95.0729	96.6958	79.8779
916.845	84.2409	85.0845	77.7976	93.6691	83.9029	89.1247
920.028	77.2827	84.4203	79.5238	83.4572	90.7936	78.7438
923.204	78.0253	91.0326	75.6548	88.7696	92.0644	83.8034
926.384	82.0132	81.1292	75.4167	90.779	87.9977	88.4559
929.554	80.8031	79.529	83.5119	85.4941	89.5792	75.458
932.796	82.0132	84.994	73.0952	85.8244	96.4417	80.9828
935.97	76.5402	87.651	73.6607	87.0906	88.1954	77.3481
939.139	79.1254	75.3623	74.6429	89.3476	82.8015	80.8084
942.338	74.6425	76.7512	77.5	88.7421	88.1107	75.6615
945.546	81.1606	85.628	71.1012	89.6229	85.682	83.28
948.717	84.7635	84.4807	76.8155	87.8613	77.9723	83.1637
951.946	89.2189	82.4275	67.6786	95.6785	90.6806	84.5013
955.136	78.2453	83.0918	78.244	83.4297	85.2302	80.663
958.315	84.3234	83.8768	73.0952	85.907	87.3764	79.3254
961.535	81.9307	85.2053	73.3929	87.3383	91.6408	77.1736
964.702	81.0781	84.843	76.9643	87.6686	86.4727	87.2637
967.875	82.0682	84.1787	77.0238	87.3108	80.2316	80.5176
971.091	77.8053	78.1703	79.8512	94.0545	88.1672	82.3786
974.298	83.4983	79.8913	75.9821	88.7146	82.8297	85.3446
977.486	73.3773	79.4082	72.3214	90.4211	87.0376	79.7034
980.646	77.8878	77.808	78.4524	88.7971	83.8464	86.1006
983.827	90.264	86.6848	73.0952	91.935	84.9478	83.5708
986.997	80.1155	80.5254	78.4226	88.687	89.6639	80.7793
990.2	76.7877	82.035	73.0655	87.8062	91.5843	83.9197
993.386	82.1507	80.4348	76.131	82.3837	90.2287	83.8034
996.62	81.7107	70.0785	74.5536	87.3933	91.3866	90.5496
999.796	79.2904	80.8877	77.6488	90.9716	83.8746	82.4658
1002.98	84.2134	81.5821	77.9464	93.5866	83.6487	82.5821
1006.14	80.5006	88.1341	77.9167	93.3113	80.0621	89.0666
1009.36	79.4829	78.6232	70.744	82.9342	88.0825	82.0878
1012.54	85.3685	81.3104	67.4107	84.916	91.1607	85.4318
1015.72	70.4895	77.8382	72.4107	84.7784	85.2019	80.2268
1018.9	79.0704	87.651	71.3393	86.2923	89.0709	82.2914
1022.12	81.8482	80.8575	71.9345	93.2563	88.7602	86.2169
1025.3	79.4554	84.3599	76.1905	89.155	82.9709	82.0006
1028.47	76.2376	79.3176	76.4286	86.7327	88.7602	84.2396
1031.69	85.7261	80.7367	73.6012	85.6868	83.6769	90.1716
1034.88	77.5578	81.2802	72.6488	81.7506	86.9811	78.802
1038.06	84.2684	77.0229	71.5179	84.2279	84.9195	79.7325
1041.27	77.6403	78.744	74.2262	78.9981	79.5256	87.4382
1044.44	82.1782	81.3104	72.1131	87.4484	83.6487	85.8098
1047.63	84.736	78.6232	68.631	88.3567	88.9014	83.0765
1050.81	82.2057	78.8949	73.3929	82.9342	87.4894	87.0602
1054	87.8438	81.7935	68.244	84.4481	85.3996	79.7906
1057.2	82.5633	80.8575	77.6786	88.9623	84.4677	84.6176
1060.38	79.758	84.0882	76.8155	91.0267	88.845	77.319
1063.56	77.8328	80.9179	77.0536	88.1916	85.8232	84.2978
1066.73	77.9153	86.1111	71.7857	84.5307	87.8001	86.3042
1069.92	76.1001	83.2428	68.8393	85.439	81.333	79.4999
1073.1	79.0979	80.7367	75.4762	90.6689	84.8066	85.3446
1076.27	80.088	76.57	78.8095	89.6504	81.5589	86.6531
1079.46	80.5281	92.4215	75.8631	87.2557	86.6704	85.7517
1082.67	84.3784	80.6159	75.2083	90.3936	90.2287	78.7147
1085.87	80.6106	88.7681	70.8333	88.7696	88.1107	76.941
1089.1	81.6557	76.872	68.006	85.0812	80.3728	83.4836
1092.29	77.5578	84.6618	73.9881	85.962	84.6936	88.0779
1095.47	78.6579	79.4988	77.3512	87.0906	84.3547	82.8148
1098.65	75.7976	82.2464	68.9583	89.6504	89.4663	86.5949
1101.84	75.275	77.5664	72.8274	89.1825	89.2121	83.5999
1105	79.0704	84.4203	74.1369	91.2744	89.8334	81.7389
1108.2	78.8504	84.6316	73.2738	89.6504	82.8862	86.4786
1111.38	81.7107	80.5857	67.7976	87.531	84.976	81.2736
1114.6	77.4477	83.9674	71.9048	86.6502	91.2172	87.4091
1117.78	80.473	82.8804	67.9167	91.88	91.5561	74.0913
1121	77.5578	74.9396	65.0893	96.9447	84.5241	79.6743
1124.26	77.4202	80.0121	72.1726	87.0906	84.9195	83.5126
1127.44	80.088	85.6582	70.625	87.1456	86.388	88.6595
1130.62	73.7624	82.971	74.8512	86.0171	88.732	81.3027
1133.81	79.4829	84.2391	71.5774	85.3289	86.5575	79.3835
1137	83.8009	85.5072	70.3869	87.4484	85.0042	81.3027
1140.2	79.2904	79.8611	77.7679	84.2004	84.2982	80.2268
1143.38	76.1551	80.1027	75.9524	84.9711	87.9695	86.1588
1146.59	75.8251	83.3031	71.994	88.9348	84.6371	77.6098
1149.84	77.2827	78.5326	71.1012	90.0908	79.4973	81.8261
1153.04	77.9703	78.3816	71.8155	88.687	85.9079	85.3446
1156.22	77.6953	81.1896	74.2857	85.2188	79.4973	79.18
1159.4	78.7404	79.0157	76.5476	88.7146	90.4547	77.8424
1162.58	77.4752	75.5133	69.5536	87.1181	80.9658	86.4205
1165.78	77.4202	80.6461	76.9048	81.8057	81.1353	75.458
1168.94	78.6854	75.2114	75.3274	82.3562	83.8746	79.6162
1172.17	75	80.8575	68.6607	90.5863	82.7732	83.3963
1175.34	85.066	75.785	72.3214	92.4855	86.8399	76.4176
1178.52	80.9131	86.4432	70.5952	86.8979	85.569	80.9538
1181.69	75.3025	82.971	74.1667	92.3479	84.8348	76.9991
1184.87	78.4378	79.2874	77.619	82.9893	87.913	77.2318
1188.06	75.22	80.5857	75.1786	94.4949	86.8681	84.1524
1191.25	83.7734	86.9263	74.3452	89.1825	84.5241	82.0587
1194.43	83.1683	92.3309	72.3512	83.4572	81.3612	82.9311
1197.6	81.0506	75.5133	78.0357	88.4118	88.7602	91.4801
1200.79	82.7558	81.7029	74.6131	86.7327	82.2367	84.0942
1203.99	82.0957	83.3635	68.1548	85.6317	96.4134	82.4949
1207.17	86.4686	79.5592	74.1964	86.5676	79.8927	80.3722
1210.38	79.2079	76.4795	70.1488	86.8979	82.8579	83.658
1213.57	78.7679	82.8804	65.8631	82.5764	79.4973	78.2495
1216.75	79.1804	80.9179	77.2619	80.7872	84.863	79.4999
1219.96	76.4576	84.3901	76.7857	85.1913	84.0158	85.9843
1223.14	81.3256	79.7705	67.3512	87.1456	82.3779	84.2396
1226.31	74.945	82.1256	69.8214	85.1363	89.4945	84.1524
1229.5	86.1661	79.0157	68.2738	86.8428	85.5126	80.9247
1232.68	70.7646	82.9408	71.1012	84.9986	89.551	79.6452
1235.86	82.6733	79.4988	71.2798	81.1451	86.6987	80.4885
1239.02	76.2376	78.9251	70.5952	86.0446	88.7885	83.3673
1242.21	79.2354	73.0072	71.9048	90.5037	87.9977	83.7453
1245.43	74.4774	84.7826	72.4405	85.3565	83.6769	84.6758
1248.63	76.5402	84.3901	73.3631	82.659	84.4959	85.8971
1251.82	77.6953	77.8382	74.2857	88.4118	90.37	78.8892
1254.99	79.4279	75.4529	75.8036	84.6683	85.2584	84.0361
1258.17	82.8383	86.5338	72.3214	84.0077	87.1223	76.97
1261.36	74.4774	77.8986	69.6726	89.733	79.808	77.1154
1264.56	77.0902	83.9976	77.3214	89.3201	90.0875	81.9715
1267.77	72.9923	76.5399	70.4464	85.7143	87.8565	88.6595
1270.97	81.4356	85.8696	70.5952	92.4855	87.9695	84.2687
1274.13	76.9802	82.4879	69.7321	84.0903	83.5357	79.6452
1277.34	72.8823	80.2234	68.5119	89.8982	79.8644	79.8488
1280.55	75.9351	80.4952	71.4583	86.4024	86.2468	79.9651
1283.77	73.0748	76.1171	74.9702	92.0451	93.1658	85.4318
1287	79.978	83.1824	68.1845	81.9433	83.8746	84.2687
1290.18	77.9703	74.6679	69.1964	89.6229	82.745	85.6063
1293.37	76.8702	82.0652	74.7024	85.7969	82.5191	77.8715
1296.55	74.9175	77.4457	72.2321	87.3383	80.9376	78.1913
1299.73	74.7525	82.5785	70.0893	87.2832	88.4496	81.7098
1303	77.3377	74.7283	70.5357	87.4209	84.8913	85.2573
1306.17	77.8603	84.8128	65.0298	87.8062	88.8167	84.5595
1309.38	80.9406	75.4831	69.5833	85.8794	83.2533	80.8084
1312.61	76.6502	79.6498	64.8512	86.2373	84.8066	81.1864
1315.78	79.3729	78.8949	74.1964	83.237	85.0042	79.936
1318.97	80.1705	77.1437	72.619	88.9623	80.4575	78.2786
1322.16	78.6579	80.2838	76.369	82.8516	87.4894	82.7566
1325.38	79.5105	78.2307	70.3274	88.5769	80.9658	83.7744
1328.68	79.4829	92.9348	76.6369	84.4481	82.3779	85.519
1331.92	69.6645	80.4952	74.7917	86.9805	81.5589	81.4772
1335.1	77.1452	80.314	72.2619	81.3653	82.5473	83.4545
1338.27	83.6359	76.9324	71.4583	90.834	85.3714	79.936
1341.48	78.2178	79.6196	73.6012	85.1638	80.8529	86.2169
1344.66	72.8548	78.8043	74.6131	88.687	93.3635	84.8212
1347.84	75.8801	77.6872	72.1726	84.0352	79.7515	83.1056
1351.07	75.6051	79.1365	69.0179	85.1087	81.3047	80.4594
1354.28	79.4554	80.0121	70.4762	93.7517	93.0811	81.8552
1357.46	69.0594	81.5217	72.3214	87.5034	85.5408	84.0361
1360.67	79.4554	83.7862	72.7679	91.1643	83.9876	83.1928
1363.85	85.3685	81.8539	72.1131	92.6782	89.2686	85.5481
1367.04	78.9329	77.8382	71.6369	84.6683	83.7616	77.2318
1370.23	79.4829	85.4469	77.2917	89.7881	79.2432	81.5063
1373.41	72.4422	81.4614	77.9167	82.8516	79.3279	80.0523
1376.61	78.6854	70.7428	76.9643	81.8057	86.614	77.7842
1379.79	75.9901	78.5628	76.1905	90.0908	92.375	84.1233
1382.99	77.8878	77.4457	72.5	95.3757	81.5871	78.9474
1386.19	82.2607	77.4155	67.1429	86.7878	85.089	81.3609
1389.37	81.8207	78.9855	72.4405	83.2095	84.3265	77.3771
1392.56	79.8955	84.9638	72.7083	93.5315	84.157	82.2041
1395.74	74.2024	80.2536	73.6012	84.5857	82.2367	76.97
1398.92	77.8053	73.4601	70.3571	89.8431	89.0709	78.6566
1402.13	80.1705	84.8732	73.2143	84.861	84.863	76.3303
1405.32	72.3872	84.2995	71.1012	85.7969	81.6436	78.8601
1408.49	69.1144	83.0918	72.619	90.9716	80.8246	81.6226
1411.68	83.0583	83.6957	74.9405	88.5769	80.2316	80.4885
1414.88	81.2706	80.9481	78.4821	93.1186	81.7283	81.7389
1418.07	70.8746	80.1932	66.7262	88.5769	79.0455	90.4333
1421.28	76.7877	80.5857	73.4226	93.7242	87.0658	81.3609
1424.5	75.055	84.7826	78.244	89.4027	85.089	87.6708
1427.7	77.1177	82.1558	70.3571	81.09	82.6038	81.1864
1430.89	80.5831	77.2947	71.756	84.6408	76.9839	83.2509
1434.08	78.7129	78.0797	74.6131	88.0264	87.7436	83.9197
1437.31	76.8152	79.2271	77.7976	83.8976	83.2533	76.8828
1440.52	77.9703	79.4988	68.4226	93.0636	92.5727	79.4417
1443.69	79.2079	79.2874	70.2679	80.8148	80.5705	83.8034
1446.87	76.7602	87.1981	70.1786	85.7693	89.7204	82.4658
1450.06	74.6975	77.9891	68.8393	82.136	82.3496	84.0651
1453.27	83.1133	78.0495	74.2857	92.1277	83.9593	85.3737
1456.44	78.0528	80.6763	72.0833	87.1731	88.7885	82.6985
1459.6	73.7349	80.6461	73.5119	86.5676	84.976	80.6048
1462.79	77.4752	77.0229	76.4286	85.907	82.5755	83.658
1465.98	83.8009	78.1099	71.994	86.6502	80.4857	81.1282
1469.17	77.8328	81.1594	70.5357	80.1541	83.451	77.7261
1472.35	77.3102	76.3587	67.6488	91.4671	80.0339	83.658
1475.54	75.3575	81.8539	69.1369	85.907	88.1107	80.9247
1478.71	79.1254	78.5326	75.5655	81.613	84.3547	85.0829
1481.88	79.0154	85.2355	70.6845	84.5032	84.5806	84.0361
1485.04	73.3223	72.4034	71.875	82.714	82.2084	82.6694
1488.21	79.3729	76.1473	68.631	88.4668	82.745	87.5254
1491.42	75.8251	85.1147	73.7798	85.962	87.7153	82.4949
1494.63	74.2024	80.7971	71.0714	88.3292	83.2251	77.319
1497.83	78.7129	76.872	73.8095	86.1272	85.1172	80.8375
1501.04	79.3179	79.2572	74.5536	82.6039	85.569	78.2204
1504.21	78.8229	78.9553	75.3571	84.4756	82.1237	81.041
1507.39	77.6678	83.3031	70.3869	98.1833	81.5024	87.4382
1510.66	73.0473	78.8345	70.2381	89.1274	87.3764	82.8438
1513.85	80.6106	79.2874	64.0179	83.9802	82.0107	84.7339
1517.04	72.6898	73.6413	73.2143	82.9893	80.1751	79.1218
1520.23	80.5556	76.8418	79.0774	89.2375	90.6524	82.2332
1523.42	75.6876	88.8587	70.9226	91.1368	80.4575	78.8601
1526.61	71.8922	86.2017	75.5655	82.5764	84.5241	82.5531
1529.81	77.3652	77.2645	73.8393	78.7228	88.2519	80.9828
1533.02	79.813	80.4348	65.8631	92.1552	89.2403	78.3658
1536.23	77.5578	77.5966	75.2976	85.2464	84.8913	79.5871
1539.42	69.802	82.4275	73.3333	87.8613	88.3366	79.6452
1542.59	73.4598	79.4988	69.7024	83.815	89.0426	79.7325
1545.76	78.5479	71.6787	68.3333	84.916	86.6704	79.3835
1548.94	75.5226	85.93	74.3155	83.8976	84.5241	78.3367
1552.18	77.5303	74.5773	70.5655	86.0996	85.1454	79.6162
1555.39	81.6832	83.2729	70.3869	84.8335	83.8464	86.0715
1558.59	78.1078	84.3901	68.6607	82.2461	86.2751	84.9375
1561.76	75.7151	79.9819	75.9821	85.9895	87.3764	87.6999
1564.96	75.6326	78.8949	62.7083	81.9433	85.2584	83.0183
1568.15	78.1628	76.0266	70.8929	84.9436	81.1353	81.9133
1571.37	78.1903	80.2536	74.256	86.5676	76.4473	85.4318
1574.56	74.1474	77.0229	71.369	83.292	78.9607	76.7665
1577.74	83.9109	82.1256	75.625	86.1822	80.2598	82.6985
1580.99	75.7151	80.5254	77.8571	93.8343	83.6487	81.1282
1584.17	76.9252	79.7101	69.1071	85.3565	85.9644	80.1687
1587.36	74.6975	78.9553	70.4464	81.7231	86.3033	78.5403
1590.53	74.4224	74.8188	72.5	84.9436	81.3612	75.6034
1593.71	74.2024	76.2077	69.5833	92.1828	82.632	82.3204
1596.89	74.4224	80.0423	66.0714	83.0168	79.4973	80.7502
1600.07	71.5347	85.5978	69.7024	86.9529	86.9246	84.5013
1603.28	80.2805	86.2017	73.4226	84.5307	81.4742	80.2268
1606.46	73.3498	84.0278	69.1071	80.9524	86.3598	77.9878
1609.63	75.7701	79.378	69.5536	87.063	86.3315	79.7325
1612.81	80.8031	82.971	71.8452	88.3567	77.7464	85.3737
1616.02	73.2673	77.0531	71.131	83.5398	79.2714	86.5949
1619.21	76.8702	80.8877	66.1012	84.6958	82.745	80.5757
1622.38	76.9252	81.1896	73.6012	82.8516	81.0506	79.4417
1625.56	80.6931	83.4843	71.2798	92.5957	85.4561	82.8729
1628.72	69.1969	81.7935	82.7976	88.4118	87.1223	78.6566
1631.9	77.3652	79.4686	73.1845	89.0999	89.6357	79.558
1635.11	79.4554	85.9903	77.3512	80.567	89.325	88.7177
1638.31	78.9329	77.657	66.7262	85.0537	85.0607	75.109
1641.51	85.5611	77.5966	74.4048	80.7322	81.1635	82.0587
1644.69	76.4301	78.9553	73.9286	80.2918	80.7964	78.2786
1647.89	77.0627	76.2681	76.131	76.2455	82.4343	74.4112
1651.07	70.3795	80.7367	72.381	89.5403	79.7797	75.1963
1654.27	76.4026	75.0604	74.1071	77.2364	81.8978	79.2672
1657.45	74.2849	84.4807	70.7143	85.5491	83.4792	80.1687
1660.63	75.6051	82.6087	67.0536	88.0264	82.9144	85.868
1663.82	73.0198	77.2041	72.381	82.4938	82.2367	84.9375
1667.03	75.275	77.4155	73.0655	91.6047	81.4459	78.0169
1670.21	74.3399	78.2307	69.7917	89.3201	86.7552	81.3318
1673.38	82.5633	85.8092	76.25	90.5037	87.5177	82.8729
1676.57	78.8229	82.0652	67.1726	83.0443	87.9695	77.9587
1679.76	78.1078	82.2464	74.6429	87.1456	84.6936	83.0474
1682.97	78.7954	78.4722	69.5536	83.0168	80.3728	74.1204
1686.16	73.5974	81.5519	72.2619	84.5032	84.9478	82.9311
1689.42	76.7052	80.0121	68.0655	79.6587	82.2367	80.1687
1692.63	74.3124	77.2041	70.4464	87.2282	88.4496	79.7325
1695.83	72.9923	76.2681	70.4167	84.5582	92.1209	78.7438
1699.02	72.7723	73.7621	71.1905	88.3567	86.614	76.563
1702.21	78.2728	79.8611	72.4107	91.1643	83.7899	86.6822
1705.41	71.4521	76.6908	77.8869	85.6592	81.4459	84.4722
1708.62	76.2376	81.8237	66.9643	86.7052	87.2917	86.5077
1711.84	74.89	74.3056	63.5119	87.2282	84.5806	77.0864
1715	74.2849	79.8309	68.8393	87.5585	91.0195	75.6615
1718.16	74.725	82.337	67.1131	85.8244	86.6987	80.9247
1721.35	79.4279	78.5326	72.9464	83.292	85.6538	78.9183
1724.56	71.5072	79.9215	70.1488	84.2279	87.9695	78.453
1727.76	79.7855	81.7935	64.256	84.9436	81.0788	81.2445
1730.96	73.6799	73.3394	71.5476	85.2739	83.0556	77.697
1734.13	78.3828	77.1437	74.2857	88.7696	83.2251	83.1346
1737.31	70.242	84.1787	70.2976	90.4211	86.5575	75.6034
1740.49	75.6051	76.3587	69.494	80.5945	82.7732	82.4658
1743.67	71.8372	76.0568	69.7321	92.1277	78.2547	81.5644
1746.83	73.8999	75.2717	73.869	81.3653	83.338	85.8971
1750	69.4719	81.7633	74.2262	89.0449	78.6501	83.9488
1753.19	76.8152	72.1014	70.8631	85.0537	83.338	77.4062
1756.38	78.3278	76.5097	66.3393	86.9254	87.2352	80.6048
1759.55	74.9725	72.3732	75.4762	85.1913	89.1556	83.6871
1762.72	78.9329	77.6872	74.7321	89.1825	81.5589	82.2332
1765.91	76.7327	75.9964	69.494	82.2186	85.1172	81.6516
1769.09	76.8152	77.9589	69.8214	81.3102	84.2417	84.1233
1772.29	77.6678	79.4384	68.8988	86.0996	84.4677	79.2382
1775.45	82.1782	77.8382	69.9702	86.6777	86.7552	77.9587
1778.63	75.9076	78.5024	68.4524	88.3292	90.2005	78.1041
1781.84	77.1177	81.5821	67.4405	89.0449	90.2852	75.3417
1785.04	77.2827	78.0495	76.8155	88.1916	82.5473	79.3545
1788.28	71.9747	80.7065	69.0476	86.2373	84.27	81.5063
1791.47	75.44	77.2645	70.7738	81.6405	89.9463	78.3949
1794.98	74.615	74.8188	67.2024	90.2835	86.8964	88.1361
1798.14	75.11	75.6944	75.1786	82.191	81.9543	80.5176

## Sheet: Figure 1-Fig sup 3-Panel H
Time (s)	AB-apm/AB-Cy5 77N0-Cy3 atp			AB-apm/AB-Cy5 77N0-Cy3 amp-pnp
0	93.2343	92.7536	81.994	78.3099	79.808	88.0198
3.655	88.2838	91.0024	86.2202	78.365	91.6408	90.5496
6.849	88.4213	93.2669	90.9524	89.0173	90.0875	95.6383
10.026	84.1584	90.8213	92.2917	84.3105	85.7667	92.4687
13.192	89.0814	90.5495	86.6964	86.9805	89.6639	99.4475
16.379	91.8042	92.7536	88.2738	80.3468	93.0811	91.451
19.554	91.0891	92.4215	88.8393	83.4021	83.0839	92.0326
22.736	95.297	86.8357	84.0179	81.9433	87.8283	90.1134
25.932	90.1265	78.3213	93.6905	84.4481	83.2533	89.2701
29.14	88.0913	87.3792	100	87.008	88.3649	82.0006
32.339	90.7591	94.3841	85.3274	82.4663	86.1621	93.69
35.531	79.2904	100	89.4048	84.3931	82.5473	92.3524
38.746	86.3586	97.192	87.619	92.5957	91.9514	97.7319
41.92	87.1287	90.7911	81.756	83.5122	89.4663	87.6708
45.099	93.3168	86.5338	86.994	86.0171	88.7602	96.0454
48.294	84.6535	92.9046	89.7619	87.1181	90.6806	92.9049
51.518	82.5358	94.9275	88.3929	86.6502	89.7204	90.0552
54.701	87.8163	89.4928	83.0655	82.136	90.5112	94.5915
57.921	93.7294	96.6486	82.381	88.0264	91.0477	89.0084
61.118	90.1815	92.1498	89.8214	85.9345	83.7052	88.8049
64.312	86.1936	94.0519	95.119	97.0823	87.2917	99.7092
67.501	90.9241	94.9577	85.9524	86.0721	88.7602	90.1425
70.67	90.7041	85.2959	86.9345	90.0083	88.026	86.5368
73.866	86.6062	90.7307	89.1964	89.6229	91.9514	100
77.045	91.2266	86.413	82.9167	81.1175	81.5589	88.7758
80.23	94.692	86.4432	82.381	87.5585	93.0528	88.863
83.394	89.5765	87.349	86.9048	88.6045	86.4727	92.8468
86.565	86.6337	88.0737	81.6369	88.5769	90.0028	89.212
89.75	92.4367	96.4976	81.7857	90.779	95.9334	86.7403
92.96	87.7063	90.5797	83.006	88.7146	96.3005	81.2445
96.147	89.0539	92.3913	82.9167	94.0545	87.0093	91.3347
99.322	94.0594	95.5012	86.8155	89.4027	84.5241	92.178
102.5	87.7063	90.3986	83.3631	84.8059	90.6241	84.0942
105.693	90.7866	89.6739	86.9643	90.5863	87.0376	90.4623
108.883	92.5193	90.6099	83.4226	94.9078	84.8066	88.7467
112.094	82.7008	90.8213	86.6964	89.7055	87.9977	89.4737
115.266	92.5193	89.6739	78.8393	88.5494	82.9992	92.207
118.432	89.4939	81.5217	84.9107	94.8527	91.4713	86.7403
121.612	85.2035	91.4251	75.119	91.2744	88.2237	90.0552
124.821	82.4257	90.1268	87.0238	82.3562	95.538	93.2248
128.015	86.5237	89.9758	79.7321	86.54	97.4866	84.4432
131.203	86.6062	89.221	90.6845	92.7608	85.3149	88.0198
134.385	92.7393	97.0411	84.1964	86.9254	88.026	86.5949
137.671	85.4235	93.2971	87.1131	87.6961	88.7885	91.0148
140.87	85.9186	87.4396	75.6845	92.7333	88.1389	90.1425
144.058	90.2365	88.2548	81.369	89.21	92.2621	88.5141
147.271	89.714	98.1582	80.0595	93.4214	92.6857	90.3751
150.498	92.0242	90.5193	91.4881	89.1825	93.9283	91.073
153.686	87.9538	94.2633	78.5714	88.109	93.0528	85.6935
156.873	84.0484	90.6703	84.7024	88.4393	88.9014	86.4786
160.068	92.3542	90.9722	83.6905	92.7608	93.9283	86.1878
163.235	87.7888	95.1087	82.381	89.8706	87.207	87.002
166.42	90.8691	84.1486	79.494	90.311	95.8486	84.0942
169.59	91.9417	90.2778	81.2798	84.2279	88.4778	90.9276
172.789	93.6744	86.6546	80.3274	87.4759	91.076	85.8098
176.005	84.0759	98.1884	77.1131	83.4572	90.3417	88.1652
179.179	81.4081	95.4106	89.1071	98.0457	88.4496	88.2815
182.348	92.6568	92.1196	80	86.5951	87.5741	95.0858
185.548	89.7415	85.8998	81.4583	88.0539	91.4431	86.1878
188.743	88.3388	88.9795	78.9286	92.0176	93.2505	91.9744
191.929	84.6535	99.4263	85.119	94.7426	91.8949	90.2297
195.095	87.7063	89.3116	78.1845	92.403	90.0311	82.9311
198.284	88.2288	90.7307	86.3393	100	93.7023	86.624
201.501	86.1111	91.244	82.9464	85.439	87.913	90.1425
204.712	100	84.994	78.0655	86.2097	89.7769	87.6127
207.895	93.6469	92.8442	75.4167	93.8343	84.7501	86.3042
211.112	87.2937	88.285	84.1369	83.292	100	93.1085
214.284	89.714	87.5604	89.2857	91.5222	96.8935	78.5112
217.51	88.1738	97.9771	84.4345	91.7974	88.2801	88.2233
220.678	80.4455	90.0362	80.7143	93.5866	86.2751	82.2332
223.848	91.3641	88.8889	81.2798	89.6504	91.1324	93.1666
227.06	80.6656	86.1111	88.6012	91.1093	85.7103	82.2041
230.292	86.7712	85.7488	88.2143	84.7784	89.6639	84.4141
233.453	87.8163	87.7717	86.9048	95.2656	94.2672	83.28
236.632	88.7514	90.006	81.6667	85.0812	92.0926	83.0183
239.794	86.5512	95.471	79.4048	84.1178	90.0028	84.9956
243.007	91.0616	90.7307	86.994	90.6689	90.7371	89.6191
246.193	79.7855	80.465	79.1667	91.5222	94.4648	84.8212
249.388	87.5688	93.9915	86.875	87.2557	86.7552	89.8517
252.559	84.9835	91.093	77.2619	94.1921	94.5496	89.9389
255.766	88.5039	79.8007	79.0179	86.1547	87.3764	82.0297
259.007	87.7888	89.4324	79.6131	92.5957	89.4663	90.695
262.235	88.6689	91.1232	80.7143	89.9532	84.6371	87.3801
265.442	89.2189	87.9831	77.8274	91.2194	85.9644	88.2815
268.662	91.2266	86.1413	81.9048	92.9535	94.126	82.1169
271.82	93.4818	92.2705	81.4583	89.7055	90.5959	94.039
275.008	84.5435	91.2742	90.2679	87.2557	91.3584	86.6531
278.21	90.2915	91.1534	74.5833	91.4121	92.4315	83.1637
281.455	87.2112	93.4481	78.75	90.5312	92.375	83.2509
284.656	89.2464	88.3756	86.1607	90.0358	86.3315	87.1474
287.858	91.1716	87.9227	84.3452	92.1552	89.2968	89.4155
291.049	84.3509	96.0145	86.5774	85.7969	91.0477	82.6985
294.215	89.3289	91.4855	81.5476	82.6865	86.8964	94.9985
297.403	88.6139	92.4215	84.7321	82.659	89.9463	89.4446
300.621	84.846	92.2705	79.256	91.3295	90.85	88.2233
303.791	86.1936	80.2234	80.8631	91.6598	89.7204	80.0523
306.986	91.1441	87.8623	85.625	87.8337	90.85	92.0907
310.164	84.3784	87.5	85.9524	85.6592	94.8037	85.9261
313.33	85.5611	91.6365	82.5298	90.1459	90.6524	87.7581
316.515	89.659	87.1981	85.8631	94.7977	94.3801	90.7531
319.706	85.6436	83.0012	75.3274	89.0173	86.9528	82.902
322.894	88.2563	91.7271	80.119	84.4206	85.3714	92.4687
326.099	85.4235	95.3502	83.1548	87.6411	91.4149	94.2425
329.356	79.7855	91.093	82.4405	89.21	90.3417	84.007
332.558	86.4136	83.756	77.5298	92.4305	89.0144	84.2687
335.772	89.934	93.75	78.1548	88.3292	92.375	87.5545
338.972	92.0517	91.0326	77.381	91.1093	87.0376	80.1977
342.188	85.066	92.1196	82.7381	86.7052	86.1903	82.4949
345.383	91.4741	88.285	79.4345	90.7514	83.9876	79.1218
348.583	88.9714	89.221	80.2381	89.21	91.3866	84.8502
351.807	90.6216	85.6582	83.75	81.6405	87.7718	87.2056
354.988	83.4708	82.1256	77.6786	93.3664	91.3866	90.5787
358.191	91.3091	88.2246	71.369	89.9807	91.1607	88.107
361.367	81.4356	88.4662	81.9643	83.9802	95.3121	82.3204
364.548	84.8735	88.3454	81.0417	89.1825	84.27	83.3382
367.732	85.286	88.9493	76.25	95.2381	92.6574	85.2573
370.922	89.3839	88.3756	78.244	91.9626	83.7052	84.8793
374.137	80.088	85.93	83.0952	90.1459	94.0695	86.3623
377.36	92.9043	91.9082	81.6369	87.7512	89.1274	82.4949
380.552	82.5633	87.8321	74.3452	96.9447	83.4792	84.9956
383.801	85.0385	93.599	77.0238	90.5312	89.0991	89.4737
386.975	80.9131	88.3454	82.4107	93.5866	88.1107	84.8793
390.217	81.2156	89.6437	78.244	88.0815	85.3431	81.9424
393.389	91.3091	78.6232	79.7321	89.0173	91.2737	95.2603
396.625	90.7041	84.2089	78.8988	82.9342	89.9463	86.5949
399.827	82.2607	86.2319	83.1548	90.3936	91.2454	84.2105
403.035	88.7514	88.1944	77.619	96.2565	92.7422	88.3396
406.22	81.1056	90.4891	82.8571	90.9441	93.307	79.6162
409.406	89.5215	85.2657	85	89.6229	95.0014	86.0715
412.615	81.8757	89.3418	74.2857	90.311	90.4829	89.3283
415.791	87.8163	92.2403	78.6607	83.6224	85.6538	81.1282
418.977	92.6018	83.9674	83.7202	91.8249	95.5662	87.9616
422.153	86.5512	93.5386	72.8571	86.6777	93.2505	85.0829
425.358	84.846	90.7609	70.6845	87.8337	86.3315	87.9035
428.56	89.604	86.2923	78.4524	89.4027	87.2352	84.2687
431.767	92.2442	87.3188	75.9524	92.403	90.7936	87.729
434.947	87.7338	88.4964	85.2976	86.2373	91.4149	82.6403
438.133	84.2684	93.5386	83.1548	91.5222	86.7269	81.797
441.31	85.9736	85.8696	79.8214	91.8249	91.6973	90.2588
444.493	91.2266	88.6171	82.2619	89.9807	85.9079	82.5821
447.709	90.7316	82.0954	77.2619	82.3011	87.8848	89.59
450.879	83.6359	84.9336	77.1726	89.4302	91.9797	84.4722
454.117	86.1111	85.9903	79.7917	90.4762	95.6509	85.7517
457.292	90.7316	93.3273	82.1131	93.3939	91.6973	82.2041
460.478	79.703	87.8925	86.5476	91.4671	91.5843	85.8971
463.649	82.6458	90.3986	78.9583	92.7058	84.9478	86.7694
466.846	83.1408	90.0664	73.9286	87.063	85.6255	96.8596
470.012	89.1914	83.7258	81.3988	87.6961	89.8899	84.007
473.186	88.3113	84.8732	72.6786	86.6502	90.963	82.1169
476.387	90.5391	83.4239	77.2024	85.7693	93.1375	83.0183
479.549	86.8537	92.7536	80.2381	87.4759	86.5292	83.0183
482.723	87.1287	93.2367	79.881	93.4765	83.1121	85.1992
485.923	82.7558	87.651	79.3452	86.6226	92.8269	84.6467
489.121	86.0286	82.1558	81.0417	88.3567	87.6306	86.8857
492.308	80.143	98.3696	83.0952	91.6873	91.7537	83.9779
495.511	81.8482	86.3829	78.75	89.1825	89.6639	85.112
498.678	84.0484	93.7198	81.875	92.0451	83.2533	87.3801
501.859	81.2156	86.8357	75.8929	87.3933	88.5343	84.6467
505.049	87.8163	82.2464	76.8452	88.9623	92.7422	82.2914
508.263	83.1683	92.2101	76.4583	89.8706	89.4663	87.1765
511.494	83.1683	83.122	80.625	91.7424	88.9014	87.5545
514.668	79.8405	78.0797	75.2976	93.2012	91.1607	86.6822
517.928	83.1408	84.8732	84.2857	93.559	93.4199	86.6531
521.101	89.0814	83.6655	77.5595	86.2373	91.669	85.7517
524.268	80.8306	81.2802	71.6369	86.9529	88.6473	83.9779
527.455	87.6238	84.4505	79.256	93.9994	91.3301	82.2332
530.62	82.6733	87.1981	79.8512	89.2926	94.2672	87.4673
533.825	86.1936	85.5072	75.9226	93.4765	88.5061	88.834
537.002	86.2486	86.5942	78.3333	89.4853	91.0477	87.8162
540.221	80.8581	88.8285	76.8452	88.4668	84.1288	82.9311
543.451	79.8405	88.3454	77.0536	90.2009	91.782	88.0779
546.644	88.4488	86.4432	80.5952	92.4855	84.8066	84.385
549.857	80.9956	89.7343	78.4226	89.2375	89.8899	86.1297
553.059	88.3113	86.1413	86.4583	85.962	88.1672	86.1588
556.253	85.9461	83.2428	81.131	86.9529	90.85	79.936
559.49	84.7635	85.1751	79.1964	92.7058	88.0542	86.8276
562.697	83.3608	85.4469	70.119	85.1638	90.37	85.6063
565.874	88.0913	81.6425	78.2738	88.8797	89.0709	83.629
569.042	88.7514	85.93	75.9821	93.6691	92.9681	84.9956
572.245	88.2013	86.8357	77.0833	85.1087	85.9644	89.1247
575.418	81.6832	84.843	75.4167	89.6504	91.0477	80.9828
578.634	85.8086	88.8889	83.75	82.4938	82.2367	86.5949
581.824	85.6711	77.8382	72.9762	84.2554	86.3033	85.3446
585.001	85.396	75.6039	76.3095	88.1641	89.8051	85.6354
588.198	79.0704	87.3792	76.1905	88.9348	90.3982	84.5013
591.383	86.7987	83.0314	76.0714	90.1184	90.4264	89.0084
594.616	85.231	84.2693	72.3512	90.5863	89.2686	85.0247
597.823	87.3212	83.3937	71.131	85.5216	80.7964	89.6482
601	85.9736	83.2428	77.4405	94.4123	88.5908	83.3963
604.194	79.538	94.2935	79.5238	89.733	96.7523	80.4885
607.365	84.1309	90.5797	72.4405	92.8434	89.438	84.8793
610.552	88.1463	89.0097	79.6131	89.678	90.0028	89.1538
613.751	79.6205	87.0773	80.625	83.4021	87.913	80.3722
616.932	84.791	88.0435	73.3333	83.76	91.9232	80.8665
620.11	82.8383	82.3671	76.4583	93.3664	89.325	82.2332
623.315	81.9307	91.9686	80.5655	90.5863	83.4792	86.6822
626.499	79.0704	83.907	79.3155	84.3931	92.7422	87.5545
629.689	80.143	88.4964	77.381	85.384	87.9413	83.1928
632.886	81.9307	82.6691	88.3631	89.21	84.976	79.4417
636.053	82.7833	83.6051	77.3214	91.1919	95.4533	87.351
639.225	82.3157	82.7597	76.6369	88.1365	88.3366	80.4594
642.491	81.0781	82.4879	75.5357	89.2926	85.1737	82.5821
645.67	83.8284	81.0688	72.0833	87.531	93.8153	79.2382
648.857	87.0737	85.2355	74.0476	91.0818	87.4894	83.9488
652.041	80.4455	84.9638	79.9405	96.5043	82.8015	87.351
655.294	87.4037	85.4771	78.8988	87.9714	87.6589	82.6403
658.477	81.1606	88.7379	77.9464	86.5951	88.7885	86.4786
661.662	76.8702	85.2959	76.1607	94.1921	89.438	87.2637
664.878	84.1034	87.0773	77.2917	85.907	91.4996	82.4077
668.061	76.5127	83.6957	81.25	89.21	90.7936	81.9424
671.245	86.2486	81.7633	76.6964	91.1643	84.2417	86.6822
674.441	85.8086	84.5109	73.6607	92.1828	84.8066	82.9311
677.627	84.956	82.7597	73.4821	87.531	92.8269	85.6935
680.81	85.7261	86.413	78.9881	80.8973	84.6653	82.6112
684.013	77.6678	88.8889	76.0119	94.1921	91.7537	84.7921
687.219	86.1936	85.3563	78.4821	85.1363	88.3366	81.0119
690.417	82.2882	88.0435	74.1369	89.733	92.488	88.6595
693.584	79.8955	80.3744	76.6964	80.5395	87.3764	81.1282
696.778	82.0407	83.122	70.9821	84.5307	88.3649	84.6758
699.943	85.5336	75.7548	74.4643	91.4396	85.3996	83.4836
703.14	78.0528	85.5676	75.625	86.9529	83.7334	82.8729
706.321	84.901	87.9529	72.4702	89.3201	92.601	81.5935
709.512	81.3806	80.314	78.75	84.6408	81.9543	81.0119
712.695	82.5908	78.8647	76.131	88.3567	85.4561	81.419
715.876	83.3883	83.9372	74.375	91.6047	91.7255	78.6566
719.049	84.1034	90.0664	76.1607	85.5767	90.7936	82.3495
722.23	90.8966	88.1341	81.131	97.853	88.1954	92.1198
725.467	78.1628	73.7923	72.4702	94.3848	86.6987	85.8971
728.653	81.7107	86.7452	79.8512	85.5216	90.7936	83.2219
731.847	85.8086	80.8575	75.8929	85.5767	89.1838	81.0119
735.083	84.571	87.5302	75.3571	83.7325	89.9181	86.3623
738.3	79.0429	86.8357	79.0774	89.2926	86.501	84.5304
741.487	84.1584	86.8961	74.256	85.4666	82.7732	81.8261
744.657	81.7107	93.3273	76.994	87.1456	87.9977	86.4495
747.861	81.5732	87.8019	79.0476	85.9895	91.782	79.6452
751.046	82.9208	90.7005	75.5952	84.5582	86.7269	83.7162
754.235	87.1562	90.2476	73.5417	91.6873	88.1107	83.0474
757.41	83.6909	85.6582	75.5655	93.6416	81.926	78.3367
760.613	75.1925	87.8925	75.0595	94.3298	86.1056	83.2509
763.772	80.9131	79.4686	80.2679	83.0443	86.4727	85.49
766.956	76.9527	86.6848	73.869	88.6045	79.1867	89.2411
770.126	81.5457	79.0761	80.7738	90.6138	86.8964	76.4176
773.323	83.4433	78.1703	72.0238	91.357	88.1672	88.1361
776.545	82.8383	84.6316	73.8095	92.7608	85.5126	75.4871
779.725	79.2079	86.3829	72.9464	87.2832	94.6625	79.1218
782.894	88.0088	77.1135	72.5893	88.0264	92.0926	86.3042
786.159	87.8163	83.6051	76.9643	85.2464	87.1505	87.8162
789.325	80.0055	80.7669	79.7619	92.5681	84.1288	80.5757
792.494	84.1034	86.9263	73.1548	89.4302	91.8385	78.075
795.704	84.2959	74.3056	73.1548	86.6777	89.1838	88.0489
798.884	80.9131	84.2995	76.6369	85.1363	87.0376	83.3382
802.052	81.1606	88.1341	71.2202	85.2464	80.2598	86.1297
805.269	85.0935	81.7935	73.869	88.1641	86.7834	84.2978
808.468	86.0286	85.4771	72.4405	92.3479	85.9079	87.002
811.66	79.8955	79.378	71.4286	89.3476	84.5806	82.0587
814.853	80.1155	85.6582	71.4583	90.5863	85.2866	83.2219
818.05	75.44	85.5374	67.6786	85.2188	87.6024	77.0573
821.216	82.3157	83.8768	75.1786	85.2739	86.4445	85.7226
824.46	86.7987	79.8611	81.6964	91.8525	92.9963	87.1183
827.652	85.9736	84.6316	74.3452	85.2188	91.0195	84.6758
830.813	81.1606	79.7403	75.119	92.1552	83.6769	80.9538
833.99	85.0385	84.6316	74.7024	91.5222	90.5394	86.2169
837.173	84.4059	83.4239	74.0476	87.063	87.4329	87.2347
840.346	74.0099	78.1401	77.0238	96.3391	87.32	89.212
843.553	81.6557	88.1944	73.2143	92.8434	85.3714	83.5999
846.718	83.1683	90.8816	70.4762	89.155	88.7038	84.5013
849.892	83.4708	84.058	74.6131	90.8065	90.5676	86.4495
853.079	81.1606	80.2838	76.3393	84.338	88.1107	87.0602
856.249	84.516	84.2391	80.3869	92.458	86.0491	85.7808
859.462	78.7679	83.907	80.3274	89.6229	84.1288	84.5304
862.631	81.0231	90.3382	80.4464	86.0996	84.4112	85.868
865.826	84.9835	82.5181	76.994	90.5037	85.9079	88.0198
869.027	79.2629	83.756	78.3631	96.0639	83.6769	82.7275
872.231	81.2706	85.8394	72.5	90.834	81.9543	84.6176
875.393	79.8955	89.6739	70.3571	91.0818	80.4857	80.663
878.628	74.4224	80.0121	76.9345	85.9895	82.8297	86.7694
881.813	81.9857	78.4118	71.4583	86.54	85.2584	84.3559
884.992	80.3355	86.9867	80.744	90.7239	86.4445	79.6162
888.159	86.4961	79.3478	72.9167	93.7517	83.564	85.8971
891.349	79.593	81.6123	74.8214	82.8792	86.4727	77.5516
894.533	79.7855	79.6498	78.869	89.5679	80.2033	81.5644
897.759	82.0132	78.8949	78.0357	89.4027	90.0028	82.2623
900.934	81.1331	82.2162	76.7857	89.6229	86.9246	75.7488
904.119	79.538	76.8116	72.2917	86.1547	86.6987	80.5757
907.304	84.1309	84.6618	76.131	87.6961	83.564	84.9084
910.465	88.6139	72.1316	79.9107	97.1649	92.7422	80.9828
913.659	81.8757	86.3527	73.4524	95.0729	96.6958	79.8779
916.845	84.2409	85.0845	77.7976	93.6691	83.9029	89.1247
920.028	77.2827	84.4203	79.5238	83.4572	90.7936	78.7438
923.204	78.0253	91.0326	75.6548	88.7696	92.0644	83.8034
926.384	82.0132	81.1292	75.4167	90.779	87.9977	88.4559
929.554	80.8031	79.529	83.5119	85.4941	89.5792	75.458
932.796	82.0132	84.994	73.0952	85.8244	96.4417	80.9828
935.97	76.5402	87.651	73.6607	87.0906	88.1954	77.3481
939.139	79.1254	75.3623	74.6429	89.3476	82.8015	80.8084
942.338	74.6425	76.7512	77.5	88.7421	88.1107	75.6615
945.546	81.1606	85.628	71.1012	89.6229	85.682	83.28
948.717	84.7635	84.4807	76.8155	87.8613	77.9723	83.1637
951.946	89.2189	82.4275	67.6786	95.6785	90.6806	84.5013
955.136	78.2453	83.0918	78.244	83.4297	85.2302	80.663
958.315	84.3234	83.8768	73.0952	85.907	87.3764	79.3254
961.535	81.9307	85.2053	73.3929	87.3383	91.6408	77.1736
964.702	81.0781	84.843	76.9643	87.6686	86.4727	87.2637
967.875	82.0682	84.1787	77.0238	87.3108	80.2316	80.5176
971.091	77.8053	78.1703	79.8512	94.0545	88.1672	82.3786
974.298	83.4983	79.8913	75.9821	88.7146	82.8297	85.3446
977.486	73.3773	79.4082	72.3214	90.4211	87.0376	79.7034
980.646	77.8878	77.808	78.4524	88.7971	83.8464	86.1006
983.827	90.264	86.6848	73.0952	91.935	84.9478	83.5708
986.997	80.1155	80.5254	78.4226	88.687	89.6639	80.7793
990.2	76.7877	82.035	73.0655	87.8062	91.5843	83.9197
993.386	82.1507	80.4348	76.131	82.3837	90.2287	83.8034
996.62	81.7107	70.0785	74.5536	87.3933	91.3866	90.5496
999.796	79.2904	80.8877	77.6488	90.9716	83.8746	82.4658
1002.98	84.2134	81.5821	77.9464	93.5866	83.6487	82.5821
1006.14	80.5006	88.1341	77.9167	93.3113	80.0621	89.0666
1009.36	79.4829	78.6232	70.744	82.9342	88.0825	82.0878
1012.54	85.3685	81.3104	67.4107	84.916	91.1607	85.4318
1015.72	70.4895	77.8382	72.4107	84.7784	85.2019	80.2268
1018.9	79.0704	87.651	71.3393	86.2923	89.0709	82.2914
1022.12	81.8482	80.8575	71.9345	93.2563	88.7602	86.2169
1025.3	79.4554	84.3599	76.1905	89.155	82.9709	82.0006
1028.47	76.2376	79.3176	76.4286	86.7327	88.7602	84.2396
1031.69	85.7261	80.7367	73.6012	85.6868	83.6769	90.1716
1034.88	77.5578	81.2802	72.6488	81.7506	86.9811	78.802
1038.06	84.2684	77.0229	71.5179	84.2279	84.9195	79.7325
1041.27	77.6403	78.744	74.2262	78.9981	79.5256	87.4382
1044.44	82.1782	81.3104	72.1131	87.4484	83.6487	85.8098
1047.63	84.736	78.6232	68.631	88.3567	88.9014	83.0765
1050.81	82.2057	78.8949	73.3929	82.9342	87.4894	87.0602
1054	87.8438	81.7935	68.244	84.4481	85.3996	79.7906
1057.2	82.5633	80.8575	77.6786	88.9623	84.4677	84.6176
1060.38	79.758	84.0882	76.8155	91.0267	88.845	77.319
1063.56	77.8328	80.9179	77.0536	88.1916	85.8232	84.2978
1066.73	77.9153	86.1111	71.7857	84.5307	87.8001	86.3042
1069.92	76.1001	83.2428	68.8393	85.439	81.333	79.4999
1073.1	79.0979	80.7367	75.4762	90.6689	84.8066	85.3446
1076.27	80.088	76.57	78.8095	89.6504	81.5589	86.6531
1079.46	80.5281	92.4215	75.8631	87.2557	86.6704	85.7517
1082.67	84.3784	80.6159	75.2083	90.3936	90.2287	78.7147
1085.87	80.6106	88.7681	70.8333	88.7696	88.1107	76.941
1089.1	81.6557	76.872	68.006	85.0812	80.3728	83.4836
1092.29	77.5578	84.6618	73.9881	85.962	84.6936	88.0779
1095.47	78.6579	79.4988	77.3512	87.0906	84.3547	82.8148
1098.65	75.7976	82.2464	68.9583	89.6504	89.4663	86.5949
1101.84	75.275	77.5664	72.8274	89.1825	89.2121	83.5999
1105	79.0704	84.4203	74.1369	91.2744	89.8334	81.7389
1108.2	78.8504	84.6316	73.2738	89.6504	82.8862	86.4786
1111.38	81.7107	80.5857	67.7976	87.531	84.976	81.2736
1114.6	77.4477	83.9674	71.9048	86.6502	91.2172	87.4091
1117.78	80.473	82.8804	67.9167	91.88	91.5561	74.0913
1121	77.5578	74.9396	65.0893	96.9447	84.5241	79.6743
1124.26	77.4202	80.0121	72.1726	87.0906	84.9195	83.5126
1127.44	80.088	85.6582	70.625	87.1456	86.388	88.6595
1130.62	73.7624	82.971	74.8512	86.0171	88.732	81.3027
1133.81	79.4829	84.2391	71.5774	85.3289	86.5575	79.3835
1137	83.8009	85.5072	70.3869	87.4484	85.0042	81.3027
1140.2	79.2904	79.8611	77.7679	84.2004	84.2982	80.2268
1143.38	76.1551	80.1027	75.9524	84.9711	87.9695	86.1588
1146.59	75.8251	83.3031	71.994	88.9348	84.6371	77.6098
1149.84	77.2827	78.5326	71.1012	90.0908	79.4973	81.8261
1153.04	77.9703	78.3816	71.8155	88.687	85.9079	85.3446
1156.22	77.6953	81.1896	74.2857	85.2188	79.4973	79.18
1159.4	78.7404	79.0157	76.5476	88.7146	90.4547	77.8424
1162.58	77.4752	75.5133	69.5536	87.1181	80.9658	86.4205
1165.78	77.4202	80.6461	76.9048	81.8057	81.1353	75.458
1168.94	78.6854	75.2114	75.3274	82.3562	83.8746	79.6162
1172.17	75	80.8575	68.6607	90.5863	82.7732	83.3963
1175.34	85.066	75.785	72.3214	92.4855	86.8399	76.4176
1178.52	80.9131	86.4432	70.5952	86.8979	85.569	80.9538
1181.69	75.3025	82.971	74.1667	92.3479	84.8348	76.9991
1184.87	78.4378	79.2874	77.619	82.9893	87.913	77.2318
1188.06	75.22	80.5857	75.1786	94.4949	86.8681	84.1524
1191.25	83.7734	86.9263	74.3452	89.1825	84.5241	82.0587
1194.43	83.1683	92.3309	72.3512	83.4572	81.3612	82.9311
1197.6	81.0506	75.5133	78.0357	88.4118	88.7602	91.4801
1200.79	82.7558	81.7029	74.6131	86.7327	82.2367	84.0942
1203.99	82.0957	83.3635	68.1548	85.6317	96.4134	82.4949
1207.17	86.4686	79.5592	74.1964	86.5676	79.8927	80.3722
1210.38	79.2079	76.4795	70.1488	86.8979	82.8579	83.658
1213.57	78.7679	82.8804	65.8631	82.5764	79.4973	78.2495
1216.75	79.1804	80.9179	77.2619	80.7872	84.863	79.4999
1219.96	76.4576	84.3901	76.7857	85.1913	84.0158	85.9843
1223.14	81.3256	79.7705	67.3512	87.1456	82.3779	84.2396
1226.31	74.945	82.1256	69.8214	85.1363	89.4945	84.1524
1229.5	86.1661	79.0157	68.2738	86.8428	85.5126	80.9247
1232.68	70.7646	82.9408	71.1012	84.9986	89.551	79.6452
1235.86	82.6733	79.4988	71.2798	81.1451	86.6987	80.4885
1239.02	76.2376	78.9251	70.5952	86.0446	88.7885	83.3673
1242.21	79.2354	73.0072	71.9048	90.5037	87.9977	83.7453
1245.43	74.4774	84.7826	72.4405	85.3565	83.6769	84.6758
1248.63	76.5402	84.3901	73.3631	82.659	84.4959	85.8971
1251.82	77.6953	77.8382	74.2857	88.4118	90.37	78.8892
1254.99	79.4279	75.4529	75.8036	84.6683	85.2584	84.0361
1258.17	82.8383	86.5338	72.3214	84.0077	87.1223	76.97
1261.36	74.4774	77.8986	69.6726	89.733	79.808	77.1154
1264.56	77.0902	83.9976	77.3214	89.3201	90.0875	81.9715
1267.77	72.9923	76.5399	70.4464	85.7143	87.8565	88.6595
1270.97	81.4356	85.8696	70.5952	92.4855	87.9695	84.2687
1274.13	76.9802	82.4879	69.7321	84.0903	83.5357	79.6452
1277.34	72.8823	80.2234	68.5119	89.8982	79.8644	79.8488
1280.55	75.9351	80.4952	71.4583	86.4024	86.2468	79.9651
1283.77	73.0748	76.1171	74.9702	92.0451	93.1658	85.4318
1287	79.978	83.1824	68.1845	81.9433	83.8746	84.2687
1290.18	77.9703	74.6679	69.1964	89.6229	82.745	85.6063
1293.37	76.8702	82.0652	74.7024	85.7969	82.5191	77.8715
1296.55	74.9175	77.4457	72.2321	87.3383	80.9376	78.1913
1299.73	74.7525	82.5785	70.0893	87.2832	88.4496	81.7098
1303	77.3377	74.7283	70.5357	87.4209	84.8913	85.2573
1306.17	77.8603	84.8128	65.0298	87.8062	88.8167	84.5595
1309.38	80.9406	75.4831	69.5833	85.8794	83.2533	80.8084
1312.61	76.6502	79.6498	64.8512	86.2373	84.8066	81.1864
1315.78	79.3729	78.8949	74.1964	83.237	85.0042	79.936
1318.97	80.1705	77.1437	72.619	88.9623	80.4575	78.2786
1322.16	78.6579	80.2838	76.369	82.8516	87.4894	82.7566
1325.38	79.5105	78.2307	70.3274	88.5769	80.9658	83.7744
1328.68	79.4829	92.9348	76.6369	84.4481	82.3779	85.519
1331.92	69.6645	80.4952	74.7917	86.9805	81.5589	81.4772
1335.1	77.1452	80.314	72.2619	81.3653	82.5473	83.4545
1338.27	83.6359	76.9324	71.4583	90.834	85.3714	79.936
1341.48	78.2178	79.6196	73.6012	85.1638	80.8529	86.2169
1344.66	72.8548	78.8043	74.6131	88.687	93.3635	84.8212
1347.84	75.8801	77.6872	72.1726	84.0352	79.7515	83.1056
1351.07	75.6051	79.1365	69.0179	85.1087	81.3047	80.4594
1354.28	79.4554	80.0121	70.4762	93.7517	93.0811	81.8552
1357.46	69.0594	81.5217	72.3214	87.5034	85.5408	84.0361
1360.67	79.4554	83.7862	72.7679	91.1643	83.9876	83.1928
1363.85	85.3685	81.8539	72.1131	92.6782	89.2686	85.5481
1367.04	78.9329	77.8382	71.6369	84.6683	83.7616	77.2318
1370.23	79.4829	85.4469	77.2917	89.7881	79.2432	81.5063
1373.41	72.4422	81.4614	77.9167	82.8516	79.3279	80.0523
1376.61	78.6854	70.7428	76.9643	81.8057	86.614	77.7842
1379.79	75.9901	78.5628	76.1905	90.0908	92.375	84.1233
1382.99	77.8878	77.4457	72.5	95.3757	81.5871	78.9474
1386.19	82.2607	77.4155	67.1429	86.7878	85.089	81.3609
1389.37	81.8207	78.9855	72.4405	83.2095	84.3265	77.3771
1392.56	79.8955	84.9638	72.7083	93.5315	84.157	82.2041
1395.74	74.2024	80.2536	73.6012	84.5857	82.2367	76.97
1398.92	77.8053	73.4601	70.3571	89.8431	89.0709	78.6566
1402.13	80.1705	84.8732	73.2143	84.861	84.863	76.3303
1405.32	72.3872	84.2995	71.1012	85.7969	81.6436	78.8601
1408.49	69.1144	83.0918	72.619	90.9716	80.8246	81.6226
1411.68	83.0583	83.6957	74.9405	88.5769	80.2316	80.4885
1414.88	81.2706	80.9481	78.4821	93.1186	81.7283	81.7389
1418.07	70.8746	80.1932	66.7262	88.5769	79.0455	90.4333
1421.28	76.7877	80.5857	73.4226	93.7242	87.0658	81.3609
1424.5	75.055	84.7826	78.244	89.4027	85.089	87.6708
1427.7	77.1177	82.1558	70.3571	81.09	82.6038	81.1864
1430.89	80.5831	77.2947	71.756	84.6408	76.9839	83.2509
1434.08	78.7129	78.0797	74.6131	88.0264	87.7436	83.9197
1437.31	76.8152	79.2271	77.7976	83.8976	83.2533	76.8828
1440.52	77.9703	79.4988	68.4226	93.0636	92.5727	79.4417
1443.69	79.2079	79.2874	70.2679	80.8148	80.5705	83.8034
1446.87	76.7602	87.1981	70.1786	85.7693	89.7204	82.4658
1450.06	74.6975	77.9891	68.8393	82.136	82.3496	84.0651
1453.27	83.1133	78.0495	74.2857	92.1277	83.9593	85.3737
1456.44	78.0528	80.6763	72.0833	87.1731	88.7885	82.6985
1459.6	73.7349	80.6461	73.5119	86.5676	84.976	80.6048
1462.79	77.4752	77.0229	76.4286	85.907	82.5755	83.658
1465.98	83.8009	78.1099	71.994	86.6502	80.4857	81.1282
1469.17	77.8328	81.1594	70.5357	80.1541	83.451	77.7261
1472.35	77.3102	76.3587	67.6488	91.4671	80.0339	83.658
1475.54	75.3575	81.8539	69.1369	85.907	88.1107	80.9247
1478.71	79.1254	78.5326	75.5655	81.613	84.3547	85.0829
1481.88	79.0154	85.2355	70.6845	84.5032	84.5806	84.0361
1485.04	73.3223	72.4034	71.875	82.714	82.2084	82.6694
1488.21	79.3729	76.1473	68.631	88.4668	82.745	87.5254
1491.42	75.8251	85.1147	73.7798	85.962	87.7153	82.4949
1494.63	74.2024	80.7971	71.0714	88.3292	83.2251	77.319
1497.83	78.7129	76.872	73.8095	86.1272	85.1172	80.8375
1501.04	79.3179	79.2572	74.5536	82.6039	85.569	78.2204
1504.21	78.8229	78.9553	75.3571	84.4756	82.1237	81.041
1507.39	77.6678	83.3031	70.3869	98.1833	81.5024	87.4382
1510.66	73.0473	78.8345	70.2381	89.1274	87.3764	82.8438
1513.85	80.6106	79.2874	64.0179	83.9802	82.0107	84.7339
1517.04	72.6898	73.6413	73.2143	82.9893	80.1751	79.1218
1520.23	80.5556	76.8418	79.0774	89.2375	90.6524	82.2332
1523.42	75.6876	88.8587	70.9226	91.1368	80.4575	78.8601
1526.61	71.8922	86.2017	75.5655	82.5764	84.5241	82.5531
1529.81	77.3652	77.2645	73.8393	78.7228	88.2519	80.9828
1533.02	79.813	80.4348	65.8631	92.1552	89.2403	78.3658
1536.23	77.5578	77.5966	75.2976	85.2464	84.8913	79.5871
1539.42	69.802	82.4275	73.3333	87.8613	88.3366	79.6452
1542.59	73.4598	79.4988	69.7024	83.815	89.0426	79.7325
1545.76	78.5479	71.6787	68.3333	84.916	86.6704	79.3835
1548.94	75.5226	85.93	74.3155	83.8976	84.5241	78.3367
1552.18	77.5303	74.5773	70.5655	86.0996	85.1454	79.6162
1555.39	81.6832	83.2729	70.3869	84.8335	83.8464	86.0715
1558.59	78.1078	84.3901	68.6607	82.2461	86.2751	84.9375
1561.76	75.7151	79.9819	75.9821	85.9895	87.3764	87.6999
1564.96	75.6326	78.8949	62.7083	81.9433	85.2584	83.0183
1568.15	78.1628	76.0266	70.8929	84.9436	81.1353	81.9133
1571.37	78.1903	80.2536	74.256	86.5676	76.4473	85.4318
1574.56	74.1474	77.0229	71.369	83.292	78.9607	76.7665
1577.74	83.9109	82.1256	75.625	86.1822	80.2598	82.6985
1580.99	75.7151	80.5254	77.8571	93.8343	83.6487	81.1282
1584.17	76.9252	79.7101	69.1071	85.3565	85.9644	80.1687
1587.36	74.6975	78.9553	70.4464	81.7231	86.3033	78.5403
1590.53	74.4224	74.8188	72.5	84.9436	81.3612	75.6034
1593.71	74.2024	76.2077	69.5833	92.1828	82.632	82.3204
1596.89	74.4224	80.0423	66.0714	83.0168	79.4973	80.7502
1600.07	71.5347	85.5978	69.7024	86.9529	86.9246	84.5013
1603.28	80.2805	86.2017	73.4226	84.5307	81.4742	80.2268
1606.46	73.3498	84.0278	69.1071	80.9524	86.3598	77.9878
1609.63	75.7701	79.378	69.5536	87.063	86.3315	79.7325
1612.81	80.8031	82.971	71.8452	88.3567	77.7464	85.3737
1616.02	73.2673	77.0531	71.131	83.5398	79.2714	86.5949
1619.21	76.8702	80.8877	66.1012	84.6958	82.745	80.5757
1622.38	76.9252	81.1896	73.6012	82.8516	81.0506	79.4417
1625.56	80.6931	83.4843	71.2798	92.5957	85.4561	82.8729
1628.72	69.1969	81.7935	82.7976	88.4118	87.1223	78.6566
1631.9	77.3652	79.4686	73.1845	89.0999	89.6357	79.558
1635.11	79.4554	85.9903	77.3512	80.567	89.325	88.7177
1638.31	78.9329	77.657	66.7262	85.0537	85.0607	75.109
1641.51	85.5611	77.5966	74.4048	80.7322	81.1635	82.0587
1644.69	76.4301	78.9553	73.9286	80.2918	80.7964	78.2786
1647.89	77.0627	76.2681	76.131	76.2455	82.4343	74.4112
1651.07	70.3795	80.7367	72.381	89.5403	79.7797	75.1963
1654.27	76.4026	75.0604	74.1071	77.2364	81.8978	79.2672
1657.45	74.2849	84.4807	70.7143	85.5491	83.4792	80.1687
1660.63	75.6051	82.6087	67.0536	88.0264	82.9144	85.868
1663.82	73.0198	77.2041	72.381	82.4938	82.2367	84.9375
1667.03	75.275	77.4155	73.0655	91.6047	81.4459	78.0169
1670.21	74.3399	78.2307	69.7917	89.3201	86.7552	81.3318
1673.38	82.5633	85.8092	76.25	90.5037	87.5177	82.8729
1676.57	78.8229	82.0652	67.1726	83.0443	87.9695	77.9587
1679.76	78.1078	82.2464	74.6429	87.1456	84.6936	83.0474
1682.97	78.7954	78.4722	69.5536	83.0168	80.3728	74.1204
1686.16	73.5974	81.5519	72.2619	84.5032	84.9478	82.9311
1689.42	76.7052	80.0121	68.0655	79.6587	82.2367	80.1687
1692.63	74.3124	77.2041	70.4464	87.2282	88.4496	79.7325
1695.83	72.9923	76.2681	70.4167	84.5582	92.1209	78.7438
1699.02	72.7723	73.7621	71.1905	88.3567	86.614	76.563
1702.21	78.2728	79.8611	72.4107	91.1643	83.7899	86.6822
1705.41	71.4521	76.6908	77.8869	85.6592	81.4459	84.4722
1708.62	76.2376	81.8237	66.9643	86.7052	87.2917	86.5077
1711.84	74.89	74.3056	63.5119	87.2282	84.5806	77.0864
1715	74.2849	79.8309	68.8393	87.5585	91.0195	75.6615
1718.16	74.725	82.337	67.1131	85.8244	86.6987	80.9247
1721.35	79.4279	78.5326	72.9464	83.292	85.6538	78.9183
1724.56	71.5072	79.9215	70.1488	84.2279	87.9695	78.453
1727.76	79.7855	81.7935	64.256	84.9436	81.0788	81.2445
1730.96	73.6799	73.3394	71.5476	85.2739	83.0556	77.697
1734.13	78.3828	77.1437	74.2857	88.7696	83.2251	83.1346
1737.31	70.242	84.1787	70.2976	90.4211	86.5575	75.6034
1740.49	75.6051	76.3587	69.494	80.5945	82.7732	82.4658
1743.67	71.8372	76.0568	69.7321	92.1277	78.2547	81.5644
1746.83	73.8999	75.2717	73.869	81.3653	83.338	85.8971
1750	69.4719	81.7633	74.2262	89.0449	78.6501	83.9488
1753.19	76.8152	72.1014	70.8631	85.0537	83.338	77.4062
1756.38	78.3278	76.5097	66.3393	86.9254	87.2352	80.6048
1759.55	74.9725	72.3732	75.4762	85.1913	89.1556	83.6871
1762.72	78.9329	77.6872	74.7321	89.1825	81.5589	82.2332
1765.91	76.7327	75.9964	69.494	82.2186	85.1172	81.6516
1769.09	76.8152	77.9589	69.8214	81.3102	84.2417	84.1233
1772.29	77.6678	79.4384	68.8988	86.0996	84.4677	79.2382
1775.45	82.1782	77.8382	69.9702	86.6777	86.7552	77.9587
1778.63	75.9076	78.5024	68.4524	88.3292	90.2005	78.1041
1781.84	77.1177	81.5821	67.4405	89.0449	90.2852	75.3417
1785.04	77.2827	78.0495	76.8155	88.1916	82.5473	79.3545
1788.28	71.9747	80.7065	69.0476	86.2373	84.27	81.5063
1791.47	75.44	77.2645	70.7738	81.6405	89.9463	78.3949
1794.98	74.615	74.8188	67.2024	90.2835	86.8964	88.1361
1798.14	75.11	75.6944	75.1786	82.191	81.9543	80.5176

## Sheet: Figure 1-Fig sup 3-Panel I
Time (s)	AB/AB-apm-Cy5 77N0-Cy3 amp-pnp			AB/AB-apm-Cy5 77N0-Cy3 atp
0	100	84.3365	82.0328	86.9652	93.6927	81.958
3.714	84.7687	80.7832	93.8689	93.8503	86.7865	88.9722
6.912	90.3411	82.161	87.5738	89.5722	92.53	83.4209
10.105	91.1516	86.2944	89.082	94.4519	87.5969	87.847
13.286	86.9976	89.5939	87.1803	97.2928	92.0366	90.135
16.48	88.7876	85.8956	90.8525	90.2741	100	91.4479
19.709	95.9473	93.2922	89.2459	97.3262	85.3066	83.6084
22.902	80.9186	82.4873	78.8852	93.6163	80.5849	91.898
26.104	96.1837	99.4561	92.5902	96.357	84.8837	95.1988
29.369	84.566	85.8231	89.4098	95.5882	84.8837	92.1605
32.572	87.977	90.6454	90.0328	95.8556	88.3016	100
35.765	89.463	83.4663	79.9672	95.3209	80.8668	87.5094
38.979	89.6319	88.905	90.1639	88.5361	88.8302	86.4216
42.154	83.8906	87.5997	83.0164	89.4051	92.1424	87.4719
45.344	80.7497	88.6875	87.7377	93.3824	87.6674	84.9587
48.573	86.3897	95.359	87.1475	92.1123	94.5736	81.0578
51.823	87.4029	90.7542	93.7377	93.6497	92.0014	87.0593
55.082	90.6788	85.3517	85.377	96.1898	92.0366	97.6744
58.276	93.2793	88.5787	94.0656	91.5441	83.439	79.3698
61.473	94.1574	90.1378	84.8852	88.8369	81.7125	85.2213
64.659	86.795	87.5997	80.3607	96.2567	93.4109	90.7727
67.882	90.9828	90.6091	92.2623	82.0187	94.0803	92.4981
71.071	94.664	93.0384	87.2787	89.0709	87.315	85.8965
74.276	93.2455	87.1646	83.1475	96.4906	89.993	90.1725
77.463	84.4985	91.2255	93.8689	91.1096	86.8569	81.1328
80.642	92.6376	94.9601	92.7213	91.143	93.3051	79.6324
83.857	84.7687	94.4162	91.7049	94.9532	88.9711	81.2828
87.092	87.1665	96.5192	89.0164	89.5388	90.1339	89.0473
90.323	92.3337	92.8571	89.082	90.6417	89.2882	84.7337
93.52	85.5792	84.6265	90.5902	97.7941	83.9323	81.5454
96.709	88.3823	83.1762	89.7377	93.5829	85.377	97.1118
99.904	89.0915	89.7027	84.7869	89.4385	84.2142	87.5469
103.11	89.1591	93.8361	91.7705	96.7914	88.2311	87.5094
106.298	90.0371	89.5214	91.5738	94.8195	87.9845	90.2101
109.486	86.9301	89.8477	88.4918	91.2433	96.864	87.1343
112.661	89.3279	91.008	89.1475	87.8676	96.8288	82.5956
115.842	89.4292	87.9623	91.7377	87.3997	87.2093	92.6482
119.016	92.1986	90.3916	90.918	87.8342	88.0902	91.1478
122.211	89.463	92.6759	88.1967	89.8396	89.1825	94.036
125.394	89.8345	100	84.7869	87.8676	82.6638	89.985
128.569	87.3691	87.4184	88.4918	86.4973	89.2882	87.0593
131.743	83.08	86.512	84.7541	87.5668	81.5011	82.8957
134.927	84.5323	91.4793	86.8525	88.4358	85.7646	88.0345
138.101	83.1814	95.4677	84.2295	95.9893	82.9457	88.7097
141.294	90.9152	91.8419	88.4918	86.1297	88.1959	84.7337
144.507	86.6937	88.2886	90.9508	84.5922	94.8908	84.6962
147.691	92.4688	87.9985	93.6066	88.9037	82.7343	92.5731
150.873	82.202	85.1704	94.8197	94.8864	90.2748	85.4839
154.049	88.0446	92.8571	84.7541	86.1631	84.6723	86.9467
157.271	90.0371	84.1914	92.1311	90.9759	82.3115	89.0473
160.472	91.9284	86.0044	91.2459	85.7955	87.5617	85.9715
163.662	86.356	87.2009	90.6557	93.6163	86.7865	91.6354
166.853	85.4441	86.3669	89.0164	91.7781	88.5835	89.9475
170.046	81.6954	84.4453	86.918	88.4693	80.8668	80.8327
173.26	82.7423	83.3575	93.8033	100	91.7195	88.8222
176.456	83.9581	93.2922	88.918	92.7139	91.191	90.7352
179.641	83.9581	90.2103	87.6393	92.3128	87.315	81.5454
182.812	91.253	90.6091	90.623	88.9372	88.6187	79.3698
186.005	88.1459	90.7179	91.4426	85.5615	80.2678	84.171
189.173	90.8477	88.76	91.082	90.6417	86.2227	89.7599
192.378	92.2324	90.8267	86.8852	90.5749	93.7632	83.4584
195.574	85.9169	92.6033	90.5902	89.8396	87.1741	85.5589
198.769	86.0858	92.9297	100	87.3329	89.0768	85.859
201.954	85.1064	84.409	87.7049	85.5949	85.518	88.072
205.123	98.5816	88.5062	88.8852	89.5053	85.4827	93.1733
208.322	90.6451	88.3974	89.9016	84.4586	86.5751	79.6324
211.542	88.5512	88.2161	88.0328	87.5	85.6589	91.1478
214.775	87.1327	91.1168	85.8361	87.5	85.1656	81.0578
217.975	89.9696	79.3691	93.0492	90.742	90.3453	85.5964
221.161	82.8099	82.8136	94.0984	86.1965	87.5969	85.1838
224.393	85.5792	89.5939	86.8852	86.5976	94.6794	86.4966
227.572	80.8173	93.5098	90.5902	86.4305	91.2615	84.1335
230.795	77.6089	87.5997	85.9344	85.6618	86.8217	81.0578
234	89.9696	84.8803	92.1639	84.2914	98.2382	82.6707
237.213	88.6187	94.6701	83.4426	90.3075	88.7949	80.5326
240.407	89.2942	93.2197	86.1639	91.6444	85.7999	84.6587
243.619	82.2357	87.3822	85.4426	81.3837	89.0063	82.8582
246.789	88.3148	83.5388	83.4426	79.5789	89.3587	77.7944
249.986	87.7069	82.161	84.0984	85.4278	88.3369	80.3826
253.174	91.4894	85.388	88.7541	83.2888	84.7428	84.3961
256.389	86.5924	92.6759	86.7869	90.742	86.9626	85.4839
259.607	73.9615	91.6244	85.7377	88.9706	94.5384	84.4711
262.868	79.5339	84.4815	87.4098	85.7286	81.8182	87.3968
266.051	87.1665	83.2487	87.8033	85.4947	87.9493	83.7209
269.245	84.2958	93.6911	94.8197	85.6618	86.5398	81.7704
272.433	88.1121	96.3017	82.918	86.9318	88.1959	85.0713
275.596	88.6525	86.8745	92.7213	79.746	85.518	76.5941
278.832	87.8082	88.1798	88.0656	88.4358	91.2967	82.4456
282.032	87.099	90.3916	89.1148	84.6591	85.3418	84.171
285.241	79.23	91.298	92.5574	86.8316	85.1304	81.5454
288.446	89.6657	86.802	91.2131	86.1631	83.1572	79.5199
291.629	83.3502	93.7636	90.5574	80.7821	88.1607	90.4726
294.823	83.7555	95.3227	90.5246	82.1524	92.9175	83.2708
298.01	85.3766	84.3365	86.0328	81.7513	85.6589	85.4839
301.231	88.3485	88.3974	86.5574	83.9238	88.9006	83.8335
304.432	81.8305	94.8876	88.1967	89.6725	94.2565	86.4966
307.627	84.2283	82.1972	83.3443	87.5	85.9408	82.4081
310.819	85.5454	90.174	91.0164	88.4693	86.3989	81.5829
314.005	84.5323	97.7883	86.9836	84.893	81.0078	78.3946
317.192	83.4853	87.5635	95.4426	87.3663	91.3672	86.5341
320.391	86.9301	85.4605	91.7705	84.6257	82.84	79.9325
323.586	83.6542	85.4967	80.8852	78.4091	86.117	89.2723
326.787	86.8288	86.5845	90.4918	78.4759	85.8351	88.6347
329.967	84.8024	85.4967	89.8033	89.6056	87.8436	80.9452
333.176	86.8288	81.5083	87.7377	76.2032	91.4729	81.3203
336.391	87.9095	87.5997	86.6885	80.615	88.7597	83.2333
339.624	87.2003	97.1719	88.4918	84.0241	90.4863	80.6827
342.799	83.0463	91.7694	88.4262	86.9652	86.7512	85.4089
345.996	91.6245	82.8136	81.082	81.6845	86.3636	76.6317
349.177	87.0652	87.3822	87.082	79.6791	91.1557	88.3721
352.364	81.9993	89.0138	88.3934	79.9131	82.8753	88.8597
355.543	81.4252	87.2734	80.1639	86.4639	90.3101	79.5949
358.709	88.8551	88.3974	87.3115	76.0361	87.2798	81.2828
361.891	85.309	86.9833	91.2787	80.0802	84.8485	84.9587
365.055	90.9828	93.256	88.8197	68.7166	91.79	84.096
368.262	89.5306	96.2654	89.6393	82.6203	91.8605	88.1095
371.424	88.7538	94.1987	80.7869	82.0856	87.8788	93.9985
374.604	78.7909	91.8419	92.459	78.7767	86.2227	79.1823
377.77	93.5495	85.8956	90.5246	85.2273	84.3904	84.1335
380.971	77.6427	81.037	78.1639	81.7513	89.0768	89.0848
384.173	85.4103	87.3822	84.3934	81.5842	87.9493	88.5971
387.384	89.0915	86.4394	86.9508	84.7259	84.5666	82.9332
390.569	93.5495	90.174	86	92.3463	84.7075	81.2828
393.74	82.202	94.1987	86.2623	85.5615	91.191	80.7577
396.931	82.0669	87.8535	92.3607	87.8342	89.4996	74.9812
400.109	77.744	90.029	85.4426	84.5588	81.2896	88.2596
403.288	82.2695	89.1226	80.2295	86.5642	89.9225	87.4344
406.51	79.2638	96.5555	86.0656	87.734	85.6942	81.9955
409.695	88.0784	88.7237	84.459	92.5134	90.6977	83.5334
412.869	81.2563	92.8571	92.2951	83.1885	87.4912	81.958
416.067	86.0182	87.0558	86.4262	77.8743	79.2459	79.1823
419.232	81.1212	82.0885	84.459	87.6003	83.2276	71.2303
422.413	80.3445	88.5787	86.6557	88.8035	76.7442	84.2086
425.599	86.8625	86.8745	89.2131	79.3783	82.981	89.5724
428.778	85.8831	95.1777	85.541	77.4733	83.9676	81.6204
431.966	81.4927	87.2371	90.6557	81.6845	84.1085	80.5701
435.156	89.6657	84.554	83.4426	77.7406	82.6638	75.6939
438.342	78.0142	85.0616	84.9836	83.8904	89.7463	83.3833
441.574	88.281	89.4126	87.5738	81.3837	84.9894	81.7329
444.739	88.3148	84.0102	88.1311	84.3249	81.9944	76.1815
447.927	85.8831	84.6265	89.5738	81.25	80.0564	79.82
451.109	83.0125	83.4663	88.7869	77.0053	84.1085	79.0323
454.283	82.945	90.2828	86.9508	79.7794	91.8605	80.0075
457.456	81.9656	81.2183	87.541	84.3249	81.9239	70.1425
460.622	85.4779	87.4184	95.8361	86.0628	84.1438	80.3826
463.86	86.5586	87.0196	89.4098	82.5201	79.2812	79.6699
467.04	82.5735	88.9413	91.4754	83.6564	85.377	77.982
470.243	87.0652	86.9108	91.8689	84.2246	83.439	81.6954
473.411	91.7595	86.6207	88.1639	81.1832	86.1875	82.7082
476.581	82.5735	87.9985	82.2623	77.6404	79.704	76.6317
479.759	86.3897	82.7774	87.0492	85.5949	85.2008	79.2948
482.952	81.6278	86.2944	89.2131	79.3115	78.0479	76.7067
486.128	80.7835	93.4373	88.7869	80.8489	83.4743	86.159
489.322	82.8436	80.0218	86.3279	77.5401	80.6906	87.9595
492.547	85.309	83.7926	92.7541	79.2781	81.5715	76.8192
495.718	86.2546	85.2067	83.377	81.6176	86.5398	82.7457
498.922	91.7933	87.9985	81.377	86.4639	90.3453	84.096
502.126	88.0108	80.7469	85.2459	81.3837	81.5011	78.7697
505.305	86.2209	83.9014	82.0328	81.6176	89.7815	84.7337
508.508	92.4012	81.2908	83.0164	83.389	88.2664	78.8822
511.684	85.9507	90.3191	87.7377	85.7955	84.5314	84.5461
514.868	87.3691	94.7426	87.6721	85.0267	81.7829	78.4321
518.047	80.0405	88.6149	87.8361	74.0976	81.2192	84.6587
521.24	84.127	91.4793	76.3607	81.5174	79.3517	81.808
524.419	88.0446	84.8078	84.9836	80.3142	87.1388	77.1943
527.639	85.9507	93.2922	82.3934	79.7126	86.5046	82.3331
530.825	85.4441	86.0406	90.0656	87.1658	86.7512	72.9557
534.033	80.7835	93.7636	81.9672	83.857	76.8147	77.7944
537.238	84.3972	90.1378	89.0492	87.1992	82.5581	81.883
540.441	84.4309	86.4757	86.8852	89.3048	87.6321	81.958
543.632	83.2489	84.7353	93.4754	91.1765	83.439	83.6084
546.835	83.8906	85.0616	88.4262	84.1912	82.1353	84.9212
550.002	86.3222	93.1835	85.0164	81.2834	85.3418	81.883
553.179	80.6822	86.9108	86.1967	79.8463	89.2882	73.931
556.386	90.1385	84.7716	83.8361	81.1832	87.1741	79.2948
559.595	88.3148	83.43	87.7377	78.7433	87.8788	83.871
562.781	88.0784	78.1363	91.1803	82.6203	76.8851	86.2341
565.99	80.2432	85.7143	87.4098	80.5147	88.1254	82.6332
569.172	84.7687	89.2676	90.5246	84.9933	74.8414	81.2453
572.388	83.4178	87.1284	86	77.3396	80.7259	81.6204
575.582	83.4853	86.3307	90.7541	81.1832	85.9056	82.9707
578.755	84.7687	89.3401	87.3115	82.2527	85.6237	82.2206
581.948	86.1533	93.2922	84.4918	84.0909	84.3904	84.2836
585.152	89.4968	91.3343	94.9508	73.5294	82.6991	83.0833
588.348	78.9936	85.8593	85.377	84.0575	86.3989	77.0068
591.537	81.5265	88.6149	81.5082	76.2366	82.6638	79.3698
594.717	88.0784	86.5845	87.8361	81.5174	83.0867	83.5334
597.894	78.048	87.8535	85.7049	89.0374	81.1487	76.7442
601.082	78.6559	89.5577	87.0492	82.3529	88.4778	84.021
604.252	85.9845	92.6759	89.0164	79.3449	87.1388	80.0075
607.452	88.4161	84.3365	93.6721	77.7406	83.5095	79.1448
610.656	82.202	85.3154	90.4918	82.2193	78.8584	78.057
613.853	85.8156	85.8956	82.2295	79.3783	85.377	79.1448
617.02	82.6748	85.7868	89.6066	79.6791	87.5264	79.1448
620.242	85.9845	89.0863	86.0328	81.0495	87.456	74.9437
623.423	88.4836	83.8289	84.3279	83.623	83.7914	77.7944
626.645	80.5133	90.6454	82.7869	73.3623	84.6371	74.2311
629.816	80.9186	87.2009	87.0164	84.4586	88.6187	75.9565
632.997	86.3222	93.9811	85.541	81.4505	84.179	76.2191
636.178	82.3033	84.7716	86.7213	77.7072	88.9711	83.0833
639.362	79.9392	87.9623	85.3443	81.484	87.4207	78.6197
642.54	84.0594	90.1015	87.9016	72.1257	81.4658	83.0833
645.739	82.0669	90.2828	84.4918	80.4479	80.6202	80.7202
648.913	82.0331	88.76	84.0984	84.9599	78.8231	75.0563
652.095	84.1608	88.6875	89.377	82.7206	81.1487	73.7434
655.275	78.0817	80.6019	88.3279	83.4893	83.8266	76.1815
658.454	81.9318	82.8499	88.3934	87.734	85.0247	79.7449
661.651	81.2226	83.4663	83.1803	78.0414	76.2156	80.1575
664.816	84.0594	87.9985	85.4754	78.2086	76.2156	86.2716
667.99	80.6147	87.636	90.8197	72.4933	82.6991	77.4944
671.165	82.0331	89.4489	88.4262	76.0027	83.8971	74.156
674.343	90.206	83.6476	86.3934	80.9158	80.3735	76.5941
677.539	86.2209	78.4627	83.4426	77.3061	72.5863	77.7569
680.715	83.4853	89.1588	81.8033	76.2366	85.4123	76.5566
683.892	91.1179	84.6628	88.9836	83.8904	89.1473	80.5701
687.07	85.1064	94.8513	87.1148	78.5094	78.8231	71.1928
690.266	81.8305	91.8057	87.2131	84.5922	78.7526	81.4704
693.436	82.641	83.3212	92.9508	81.3503	83.4038	77.982
696.614	91.253	78.1363	82.9836	87.3997	79.7745	79.4074
699.789	86.356	91.153	89.5738	80.9492	77.167	80.4951
702.963	81.2226	88.6149	86.5246	76.2032	79.5631	72.1305
706.133	83.0463	89.5939	83.8033	82.6872	79.9859	76.2566
709.304	81.1888	86.9108	83.541	79.3115	81.1487	82.4831
712.487	84.7349	85.388	81.7705	85.5615	82.1001	79.4074
715.648	89.9358	88.0711	82.7541	79.8128	80.7611	76.144
718.904	87.2678	95.4677	88.1967	79.6457	83.0867	79.97
722.07	84.0932	81.182	86.8852	87.5668	82.8753	70.8177
725.244	82.5735	91.2618	83.6393	75.0668	83.4038	80.0825
728.431	82.6748	89.1226	78.5574	77.7741	83.439	80.0825
731.615	88.281	91.1168	87.7049	80.3142	78.9993	82.3706
734.802	84.1608	90.8629	88.5902	82.2193	76.0395	75.0563
737.997	84.0257	90.1378	81.6066	77.0053	79.2107	84.021
741.198	82.0331	88.8687	86.9836	81.6845	78.7526	84.8462
744.393	88.5512	89.1588	84.1967	74.7326	82.7343	75.3188
747.584	81.9656	88.7962	82.0984	85.0602	84.2847	85.5214
750.755	84.0932	88.2524	89.9344	76.3703	80.444	82.1455
753.965	83.4853	92.4583	88.3934	83.4225	83.5095	75.919
757.165	85.4441	84.9891	86.8525	75.2005	81.7477	74.6437
760.357	81.7629	86.657	86.1967	78.5094	78.2241	80.0825
763.555	86.356	85.0979	83.7049	80.9826	81.0078	78.132
766.757	80.412	91.7694	85.8689	83.0214	87.0331	73.1433
769.926	83.5529	87.2009	89.9016	77.9746	79.6688	80.1575
773.135	84.1608	92.3495	78.7869	74.5655	83.1924	82.8207
776.314	85.9169	93.9449	86.7541	84.2914	82.6286	81.5079
779.525	75.3124	85.8231	77.9672	81.6511	82.1705	80.7202
782.7	81.4927	84.9891	83.082	82.4198	79.7745	85.5214
785.876	83.2151	85.2429	80.8852	76.8382	77.6603	76.144
789.054	80.8511	85.8956	82.9836	82.4532	88.1607	73.3683
792.232	87.9433	86.657	80.3607	77.2393	79.4574	78.6572
795.411	87.9433	85.9681	89.6066	74.766	80.7259	75.1688
798.59	84.2621	87.2009	87.5738	81.8182	78.506	84.171
801.774	85.3766	86.0406	87.9016	72.627	82.6991	76.0315
804.989	79.3989	84.554	81.8689	76.9719	77.8717	75.5064
808.179	86.0182	79.2241	80.459	77.2393	78.6822	72.6557
811.381	77.8791	85.678	89.9016	74.1979	81.0078	73.4059
814.581	80.3445	95.3227	81.4098	81.7513	78.1184	76.5941
817.77	83.8906	87.2371	89.3115	74.0307	78.5765	85.934
820.943	79.2975	83.9739	89.1803	79.3449	80.3735	69.0548
824.119	76.7984	84.9166	83.2131	71.2901	78.1889	77.0818
827.308	87.5718	90.3916	93.1475	72.9947	79.845	72.4306
830.495	83.08	86.2944	88.2951	72.8275	83.9676	73.3308
833.698	89.6657	86.4757	83.7705	78.4425	86.6808	77.1193
836.899	77.8116	80.4569	89.2787	74.365	76.2861	72.3931
840.079	86.0858	93.1835	82.7541	78.6765	76.8147	81.3203
843.287	88.2134	82.3785	77.3115	78.2086	81.4658	82.6707
846.463	82.8774	86.2944	87.0492	76.0027	89.0063	79.6324
849.651	86.4573	86.1856	82.0984	79.3783	75.4052	74.1185
852.817	75.6163	83.0312	81.9016	83.3556	80.6906	76.4816
856.052	90.2398	83.5751	81.377	77.8075	77.1318	78.4696
859.225	86.5924	91.008	81.2459	74.8329	83.0514	81.1703
862.418	82.4721	94.2712	84	82.9545	69.3094	76.8567
865.581	82.4721	86.657	74.8852	72.9947	73.6434	74.2686
868.752	77.7778	90.8629	86.0984	79.4452	76.3918	72.9932
871.948	80.412	87.2009	88.2295	76.7714	83.7562	81.0953
875.236	81.2563	89.9565	81.4426	75.234	77.907	78.5071
878.424	77.9129	84.3002	85.9344	79.2447	84.4609	75.9565
881.619	80.3445	87.7085	86.0656	77.3061	85.518	76.4066
884.79	84.7349	86.3307	87.9344	82.8543	78.2241	76.3691
888.015	81.3239	88.905	82.8852	74.5655	82.2763	67.7044
891.198	83.9243	84.1189	91.1475	79.6791	76.7794	83.1958
894.408	83.6204	88.7237	86.4262	82.7206	81.9239	74.5686
897.616	77.4063	88.8687	92.2295	78.9104	81.8887	74.4186
900.798	83.7217	89.7389	88.6885	78.2754	75.969	72.0555
904.018	80.5133	88.7237	82.1967	71.758	81.8887	75.0938
907.215	82.7423	83.1762	86.5246	78.3422	81.2544	75.5439
910.425	86.4911	78.3539	82.1311	79.7126	83.2629	83.6834
913.596	89.0578	87.4909	85.0164	74.0976	77.308	75.7689
916.781	81.9656	93.546	89.9016	78.1751	81.043	82.0705
919.977	85.9507	88.5424	83.0492	78.6765	77.8013	74.6812
923.271	89.0915	94.9964	89.0492	74.365	81.8182	82.8207
926.435	76.3931	87.5997	84.8197	77.6404	82.8753	74.006
929.644	83.0125	95.6128	90.1639	75.3676	77.8013	72.9182
932.867	82.2695	87.9623	90.3934	75.9693	79.2107	75.5439
936.038	78.8247	84.9529	88.8525	75.8356	79.4926	74.4186
939.247	75.4137	82.9587	84.6885	76.2032	78.6117	75.3563
942.431	86.052	87.0558	86.7869	75.6684	77.5194	78.9197
945.626	84.2283	80.8194	85.0492	72.5602	78.9641	74.9062
948.815	83.5529	87.8898	87.7377	76.4037	78.0479	73.3308
951.994	84.9037	86.4757	77.7705	78.008	73.3968	72.8807
955.192	83.0463	88.0348	83.4754	70.0201	77.0261	80.6452
958.469	80.5809	83.8651	84.2951	79.1778	76.1804	73.856
961.658	84.87	84.554	82.8852	74.5655	86.0465	70.7052
964.848	84.3296	88.9775	91.3115	71.9586	79.9507	76.7817
968.03	80.0068	83.1762	88.6885	73.7299	77.6603	71.868
971.206	80.2432	87.781	82.7213	73.6631	77.8013	83.1208
974.375	87.8082	85.8956	83.541	79.3449	84.0381	75.919
977.548	73.6575	93.3648	83.8033	73.6965	78.4355	70.8927
980.718	87.3016	90.6817	88.2623	69.8529	82.8048	76.5566
983.902	81.7291	79.8405	82	76.9051	81.7125	78.2821
987.103	81.5941	83.5751	86.9836	76.2701	82.7343	82.108
990.273	78.048	88.76	89.6393	80.1805	81.2896	66.7667
993.467	81.4927	86.9833	87.8033	77.8409	76.4623	75.3188
996.646	79.1624	86.2944	88.6885	69.2179	80.303	73.9685
999.836	83.5866	81.1458	86.459	72.6604	89.0768	72.093
1003.02	80.8511	80.6744	85.377	78.5094	84.6723	75.5064
1006.21	78.1155	88.5424	79.6066	75.7687	82.6638	75.7689
1009.41	87.7744	89.1226	82.2951	70.0535	76.7442	80.2326
1012.59	84.7011	89.7027	84.9836	81.6845	81.3249	78.7322
1015.77	80.412	90.5004	80.918	82.5869	78.2593	81.3953
1018.96	79.4326	95.6128	81.8033	73.2286	83.6505	79.82
1022.13	76.1905	90.3191	88.5574	75.1337	74.8414	73.5559
1025.34	78.0142	85.533	83.6721	72.861	83.8619	79.4824
1028.51	83.5866	95.7941	87.5082	78.9439	76.6032	72.0555
1031.72	82.1006	79.6592	79.4426	76.8717	76.1452	74.5686
1034.93	84.566	87.4909	84.5246	77.3396	77.6603	71.6054
1038.15	87.6393	91.8782	86.6557	73.3957	74.63	77.1193
1041.35	82.337	83.0674	89.2787	75.3008	81.7829	75.844
1044.55	89.3955	82.7411	81.4426	76.0695	77.6603	74.4561
1047.76	87.977	86.1131	85.4426	76.0695	74.2072	68.3421
1050.93	82.945	84.8078	93.1803	73.1283	76.9908	74.6437
1054.24	83.08	83.2125	83.5082	82.2861	76.8499	76.2566
1057.41	79.5339	87.5635	94.2295	73.9639	81.9239	78.5071
1060.58	79.5002	93.1835	82.1967	71.4572	76.0747	79.1073
1063.82	82.7085	90.9717	90	74.9666	70.0846	82.1455
1067.01	84.4985	89.8115	87.2131	75.3008	76.7442	77.6069
1070.23	87.7406	91.6606	79.4098	70.9893	71.2474	71.5304
1073.4	82.3033	84.8441	88.1311	84.6925	76.9908	76.0315
1076.58	80.2094	82.9224	89.9344	77.607	77.6251	75.0938
1079.81	86.9301	86.3307	85.9344	77.3396	75.7576	78.0945
1083.02	84.566	79.4054	88.5246	74.4987	77.6251	75.9565
1086.2	82.945	91.5518	82.4262	74.5989	75.4405	73.6309
1089.39	83.2151	86.2582	86.8852	75.5013	71.6702	69.2423
1092.58	81.3576	89.5577	82.1311	76.0361	79.4574	75.3563
1095.78	87.6731	80.4931	85.1475	81.9184	85.0599	78.8072
1098.96	83.6542	83.9739	80.9508	78.0749	78.7879	77.0443
1102.15	78.6221	88.1073	81.7049	74.5321	90.6624	68.5296
1105.36	83.9243	87.0921	80.5246	78.3422	72.3749	80.6827
1108.6	83.0463	86.7658	86.7869	79.3115	78.5412	76.2566
1111.8	79.973	87.5997	78.918	73.9639	82.6286	78.6197
1115.02	82.2695	88.0711	76.7541	70.6885	79.7393	77.4194
1118.18	79.23	90.1378	92.9508	66.5107	79.105	83.6459
1121.47	83.5191	75.9246	80.7213	74.0642	77.2023	72.3556
1124.65	80.8511	92.9297	83.3115	75.8356	81.2896	72.2056
1127.88	81.3576	88.8325	84.3279	74.8329	81.7125	76.2566
1131.11	77.6089	88.8687	91.7705	74.9666	75.5462	75.5439
1134.29	83.1814	87.7447	80.4918	78.242	77.8365	81.6579
1137.48	83.1138	82.2335	84.9508	72.0254	81.8182	69.9175
1140.67	74.6707	83.7926	83.6066	74.6992	71.635	76.2566
1143.87	77.1699	85.6418	81.8033	80.4813	76.2156	73.4809
1147.05	85.4441	84.8441	85.1803	80.0134	77.0965	77.0818
1150.23	87.1665	86.9471	86.3607	73.6631	75.8985	74.0435
1153.44	83.6542	81.5809	84.918	74.9332	77.2375	75.5064
1156.62	77.3725	86.0406	81.0164	77.6738	71.8464	74.6812
1159.82	82.6748	85.4605	83.3115	80.0134	79.3164	72.5431
1163.02	80.716	87.9985	88.918	72.5267	70.2255	67.5544
1166.21	80.7497	85.7868	87.5738	81.9519	77.1318	74.6062
1169.4	81.9993	81.8709	92.9836	80.2473	75.7928	74.2311
1172.6	86.9976	85.6418	87.5082	69.0174	80.303	77.6444
1175.83	87.538	86.657	89.0492	72.7941	78.6117	72.093
1179.02	75.7852	78.8252	88.8525	81.1163	77.4489	70.1425
1182.21	80.8173	89.6302	86.5246	81.7848	75.4757	69.3923
1185.39	84.8362	78.5714	83.7049	70.3543	71.3883	72.5431
1188.59	77.4738	78.1363	84.623	74.4652	74.5595	72.9182
1191.8	77.3387	86.0769	81.082	81.9519	75.6166	73.2558
1195.02	80.3783	74.9456	84.3279	72.627	73.0092	70.5926
1198.23	79.1962	89.7389	82.9836	69.6524	70.4017	73.3308
1201.41	86.1871	86.9471	85.4426	80.0134	73.6082	75.2813
1204.6	80.2432	86.8745	81.8689	76.2032	77.0965	74.9812
1207.8	77.9466	91.0805	81.8033	75.1671	78.1184	76.4066
1210.98	83.6879	87.2009	83.0164	76.9051	79.4574	76.2191
1214.17	80.8173	88.4699	80.2295	72.8944	77.6956	69.5424
1217.38	83.3502	87.1284	85.9344	76.6377	77.2375	65.6789
1220.58	76.6295	87.1284	82.0328	70.9893	72.4101	69.0548
1223.77	84.2958	88.7962	81.2787	73.1952	74.7005	78.2821
1226.98	92.2661	83.3938	80.3279	72.0254	76.2509	69.4299
1230.18	83.9243	83.9376	86.3934	71.2233	73.3263	72.0555
1233.39	80.9524	85.2067	92.4918	75.4345	76.2156	73.6684
1236.58	73.5225	96.3742	81.1475	69.1845	80.4087	74.8312
1239.79	82.9787	87.0921	82.2295	71.9586	71.7407	78.1695
1242.96	78.3857	83.3575	87.1475	79.3115	77.9774	77.4194
1246.17	74.8058	91.1893	90.5902	70.1537	76.0395	72.9932
1249.4	78.926	81.1095	82.5246	73.9639	78.8231	70.2176
1252.59	84.9375	87.0558	83.4754	75.8021	74.2424	73.5559
1255.76	80.5809	91.008	81.8361	76.6377	76.0747	72.6182
1258.94	83.4178	87.8535	88.3279	77.3061	79.3164	69.2798
1262.15	78.5208	84.8441	82.0656	72.2594	84.3552	86.5341
1265.34	84.5998	84.9891	90.0984	75.0334	77.6956	64.7412
1268.51	93.0091	91.6969	86.6557	71.1898	76.7442	71.7929
1271.74	78.4195	84.1914	84.1967	72.627	72.833	68.192
1274.94	87.8082	86.1131	91.7377	72.861	75.0176	76.7442
1278.11	78.4195	86.8745	83.6066	72.9947	75.37	76.1065
1281.28	81.0537	87.2371	84.3934	69.2848	83.3333	75.0938
1284.46	78.487	84.9529	88.1311	78.008	75.7928	76.7442
1287.62	83.5191	84.5178	89.5082	79.3783	76.8499	79.5949
1290.8	81.1212	81.1095	82.3279	74.365	79.4221	76.1065
1293.98	70.6518	87.4184	84.2295	76.0695	76.3566	73.2558
1297.16	82.9112	87.2009	83.3115	80.0802	78.5412	76.5941
1300.37	78.5545	85.2429	74	74.7326	76.0395	72.6182
1303.57	80.2432	92.2408	87.5082	71.0561	77.766	73.1058
1306.76	90.1722	89.7752	82.1967	71.5575	75.828	73.5184
1309.95	87.0652	86.5482	84.3934	72.3262	77.3432	70.0675
1313.13	82.9112	85.1704	79.8361	76.4706	82.0648	68.3421
1316.37	79.9054	79.8405	85.3443	74.8329	76.6737	80.4951
1319.55	78.9936	86.0769	82.3279	72.6604	71.8464	69.9175
1322.74	85.5454	90.1015	84.2951	77.8075	81.2896	74.7187
1325.95	82.1006	88.4336	82.6557	77.7741	76.8499	77.2693
1329.13	79.7366	86.802	89.1475	73.9639	77.5546	76.6692
1332.33	81.6616	85.0254	80.8852	76.3369	70.155	70.3301
1335.51	79.2975	88.1798	84.2951	74.9666	73.0444	69.5424
1338.7	78.3857	86.4757	82.2295	65.9759	78.4708	74.081
1341.89	78.7572	82.0522	88.8852	75.9358	79.2459	77.6069
1345.11	85.5792	89.05	77.4426	71.6243	80.1268	73.5934
1348.36	79.7028	86.4757	87.1148	75.4679	82.3115	70.7802
1351.53	80.7835	84.8441	83.4098	72.3596	77.907	75.844
1354.7	82.7423	82.8861	84.0328	76.5709	72.9387	73.7809
1357.91	80.6822	94.4162	88.0656	75	76.7089	77.0818
1361.1	94.7653	93.3648	82.3607	77.7741	70.1903	73.1058
1364.28	86.0858	88.3974	90	72.4599	77.6603	70.7427
1367.47	81.5265	80.1305	83.541	72.627	73.6082	66.9167
1370.67	76.1567	87.7447	81.8033	72.7273	76.2861	71.1178
1373.85	78.8923	93.401	87.5082	74.9666	69.7322	79.4074
1377.06	78.6559	90.7179	84.0984	71.5909	81.6068	80.9452
1380.23	80.3783	87.2371	83.6721	74.1979	71.1416	70.9677
1383.41	81.5941	90.3916	83.3443	78.9773	78.1889	68.8672
1386.62	77.8453	90.6454	80.0984	67.2794	79.9507	69.6924
1389.81	82.4046	78.4627	82.6885	70.6551	74.5948	69.7674
1393.03	88.5849	79.3328	85.7705	71.0561	72.4454	74.2311
1396.22	78.6896	91.1168	88.9508	79.111	75.4405	72.6557
1399.44	82.3708	81.3996	87.6066	74.0642	78.4355	70.7427
1402.65	76.0892	82.5598	83.4754	71.2567	76.3566	63.8035
1405.82	84.2621	95.5765	81.377	75.2005	77.5194	73.856
1408.98	70.8207	83.8289	82.3279	69.7861	73.6082	73.5934
1412.18	79.1287	88.0711	81.8033	75.5013	71.1769	74.5311
1415.37	85.7143	90.4641	82.5902	72.0922	74.1367	75.0938
1418.54	81.4927	88.1073	83.2787	70.9225	75.37	72.018
1421.74	82.2357	77.0848	83.0492	72.3596	76.568	70.7427
1424.92	89.6657	84.0827	83.6393	71.8917	72.2692	68.1545
1428.1	79.8379	92.9659	78.3607	69.619	73.1149	77.4569
1431.29	82.4384	84.1914	82.0984	71.5909	72.4101	76.2191
1434.46	78.9936	80.0943	91.5738	74.0642	81.4306	71.0053
1437.64	76.5957	80.892	84.918	72.9612	66.3848	73.2933
1440.83	82.9112	77.8825	77.377	75	77.167	74.5686
1443.99	81.6278	74.9456	78.2623	78.008	77.766	73.4434
1447.18	81.9318	88.5424	85.0492	71.7914	76.3214	77.3068
1450.35	83.823	79.0065	85.6721	75.5013	72.5159	67.1418
1453.54	82.9112	80.6381	85.377	74.365	71.635	75.3188
1456.72	80.2432	86.5482	79.5082	71.7914	75.1938	66.0915
1459.89	79.5339	84.6265	82.2951	73.2286	75.5814	70.8552
1463.1	80.3107	87.2009	82.2295	71.5575	73.5729	68.6422
1466.29	83.9581	89.0863	72.4918	75.0668	71.9873	76.4441
1469.45	81.6278	86.512	86.3607	69.6524	77.2375	75.5064
1472.65	73.2523	86.9471	82.623	69.385	76.3566	75.4689
1475.85	80.8173	80.058	90.2623	78.4759	75.8985	70.8552
1479.05	85.5117	86.657	75.4098	73.3289	82.1001	77.7194
1482.26	78.9936	85.0254	85.8689	69.619	79.3869	76.5941
1485.45	80.6822	76.2509	88.0656	71.992	77.0613	65.2663
1488.62	85.4103	91.9869	88.3934	69.5187	70.2255	73.1808
1491.83	76.0216	83.5751	78.0328	73.0615	78.4708	71.3428
1495.01	80.6822	84.8803	80.918	74.7326	69.8379	71.2678
1498.19	89.5981	83.6476	87.4754	74.8329	76.9908	67.3293
1501.43	81.1212	91.8782	80.3607	73.1952	77.167	72.018
1504.62	81.4252	86.512	81.3443	75.0668	73.4672	72.093
1507.79	83.9243	85.2429	76.2951	72.8944	71.1769	64.066
1511.01	80.7835	83.1762	85.7705	69.2848	77.6956	64.1035
1514.2	77.001	84.554	84.5246	69.3516	73.432	72.9932
1517.46	81.5603	87.3096	88.8197	76.8048	71.7759	75.2438
1520.68	86.0182	88.3611	83.4426	70.0869	77.4489	74.6812
1523.86	88.0446	84.6628	84.4918	77.1725	79.8802	74.0435
1527.04	87.4367	85.4605	86.9508	66.4773	69.4503	67.0293
1530.23	80.8511	88.3974	82.8852	71.7246	77.7308	77.1193
1533.41	88.0108	84.6991	84.8852	77.7406	69.4503	67.7044
1536.63	89.4968	82.5961	82.8197	67.2794	72.9035	70.105
1539.83	88.5849	89.7752	86.6885	78.2754	69.0627	72.0555
1543.02	80.8511	84.3727	90	73.6631	72.9035	67.0293
1546.2	83.7217	85.533	83.8033	70.9893	69.9084	69.9175
1549.43	80.8173	82.0885	86.3607	71.5241	79.7745	68.042
1552.61	77.6765	90.3191	86.3607	73.7968	73.3968	72.5056
1555.79	81.2226	83.5388	79.1475	69.4853	75.37	70.03
1558.96	79.7028	90.9717	85.8033	70.0201	74.1367	75.5439
1562.16	77.1361	85.7868	85.1803	72.0254	73.5025	70.2176
1565.34	81.5603	89.4851	77.3115	73.5628	73.2558	68.2296
1568.53	83.2489	85.5693	91.4098	72.8275	74.5595	69.9175
1571.74	82.2357	85.533	88.1311	70.0869	75.4405	68.042
1574.95	81.4252	86.1494	81.377	65.2741	75.2995	71.3428
1578.13	84.3634	81.5083	81.6721	72.0254	79.704	72.093
1581.35	81.6954	96.8455	86.0984	69.7861	76.8499	70.03
1584.52	83.4515	82.1972	78.4262	74.3316	71.1064	77.907
1587.76	81.7291	84.0464	82.5574	70.0535	68.0409	65.829
1590.92	85.2415	80.3843	78.7869	76.2032	68.8161	71.3053
1594.1	79.2638	88.9775	80.9508	66.8783	77.766	65.979
1597.29	84.2621	87.926	87.2787	69.1176	70.155	72.2056
1600.51	85.2077	83.8651	86.1311	80.1136	73.8901	72.9932
1603.7	75.4813	85.4967	83.4098	70.6885	77.5899	68.7547
1606.87	76.6971	91.3706	79.6393	68.4492	74.3481	71.1928
1610.06	81.8305	83.9014	80.0984	72.6939	83.6152	74.2311
1613.27	75.5826	88.0348	84.5246	73.6631	78.5412	68.0045
1616.44	78.2506	87.8535	87.8361	70.0201	78.9993	72.6182
1619.67	85.6467	81.4358	88	77.7072	82.4524	75.2813
1622.85	81.6278	86.1494	80.6557	70.3209	75.5462	69.2798
1626.01	81.898	85.7143	79.6066	63.8369	74.2777	75.2063
1629.21	84.8024	84.0464	79.5082	70.6217	78.5412	77.7194
1632.41	77.8116	87.0196	79.1803	73.6631	74.771	68.9797
1635.6	85.2752	92.9659	84.1639	73.6965	76.7794	72.9557
1638.78	87.977	78.1001	83.8689	71.6912	79.1402	68.192
1641.96	80.8848	82.2335	84.459	73.2286	74.1367	72.6182
1645.14	81.459	79.8042	82.6557	68.8837	78.8584	69.2423
1648.33	88.9902	80.0218	82.8852	73.7968	72.9387	77.2693
1651.51	81.155	79.7317	81.5738	72.2928	70.895	69.5424
1654.71	77.9804	86.9471	76.4262	71.3235	78.1536	71.4554
1657.9	81.4927	87.6722	82.9508	68.7166	71.5997	71.2303
1661.1	79.1962	86.2219	82.9508	69.4853	73.2558	70.1425
1664.31	78.8585	88.6149	82.9508	66.9452	72.9035	72.2806
1667.52	80.8173	82.0522	78.623	76.9385	81.7477	75.3563
1670.71	73.0834	81.9797	86.8525	70.4545	65.1868	71.2303
1673.9	78.0142	91.008	86	69.7861	74.1015	74.3811
1677.11	81.7629	87.1646	85.5082	70.6551	68.957	72.5806
1680.3	84.127	75.5983	85.8689	68.984	78.9993	68.9422
1683.47	74.6032	83.3575	87.7705	71.3904	73.9605	74.006
1686.67	76.258	87.3459	82.2295	75.4011	76.5328	71.9805
1689.87	85.8831	84.4453	77.4754	73.3289	68.6399	70.2176
1693.07	81.6954	87.1646	80.5574	76.4706	74.4891	69.7299
1696.26	84.566	77.5562	87.2131	65.6751	71.2826	67.2168
1699.45	76.6633	84.409	83.7377	70.3209	68.3228	71.868
1702.64	78.4195	83.0312	79.082	72.627	70.0141	72.093
1705.83	84.7687	87.5272	80.5574	69.2179	72.4806	64.2161
1709.02	82.8774	80.3481	76.7213	67.4131	76.7442	68.6422
1712.2	75.4475	87.4184	82.2623	76.2366	76.3918	68.6797
1715.38	83.823	87.1646	90.7541	69.8195	77.2375	72.5431
1718.57	84.127	81.6534	77.4426	69.9532	75.5109	75.3563
1721.76	76.5957	88.5424	83.1148	63.9037	76.6737	72.7682
1724.93	77.7102	78.0638	85.8689	71.2567	77.4137	69.8425
1728.13	78.3857	84.0102	75.9344	73.2286	78.3298	72.2431
1731.32	75.4137	84.264	81.0164	70.1537	75.2995	68.2671
1734.55	77.8453	83.5025	75.6721	62.8676	79.4221	70.7052
1737.73	80.8511	85.7143	78.2623	67.8476	74.4186	62.2656
1740.9	82.4384	77.9913	86.7213	75.8021	75.0881	62.078
1744.09	81.8305	81.0732	87.541	66.6778	69.098	69.88
1747.3	79.8041	86.8383	85.0164	65.107	75.4405	75.4689
1750.51	78.9598	82.8136	81.7049	71.5909	76.0747	65.5289
1753.7	77.6765	89.6664	78.6885	74.766	68.358	65.5289
1756.9	71.9689	83.5025	75.3115	70.5548	80.3735	68.6422
1760.09	76.8322	81.8709	83.9672	71.9586	73.1149	62.7157
1763.28	81.2901	88.7237	84.3279	71.9586	83.2276	71.4929
1766.46	83.0463	85.2429	79.4426	70.9559	66.7371	74.4561
1769.65	80.1418	83.6113	85.377	72.2928	81.1135	59.5274
1772.9	82.5397	83.6476	85.1148	69.1511	71.7407	69.0923
1776.09	78.926	89.5939	86.0984	74.5989	77.7308	68.0045
1779.29	75.8865	81.9072	82.0656	68.0147	71.2474	68.2671
1782.49	82.3033	85.6055	79.5738	68.5495	69.5208	67.7419
1785.73	79.23	81.037	75.2459	70.3209	75.6166	63.1658
1788.92	76.6633	82.1972	76.623	69.7527	70.4369	74.3811
1792.13	80.0743	85.678	79.6393	69.9866	70.3665	62.7907
1795.41	76.3256	84.7716	82.918	66.3102	69.8379	71.9055
1798.59	78.487	83.0674	88.0984	65.107	71.5292	72.2431
