# Supplementary material for: Dual engagement of the nucleosomal acidic patches is essential for deposition of histone H2A.Z by SWR1C
Source: eLife. 2024 May 29;13:RP94869. doi: 10.7554/eLife.94869 (PMC11139478; doi:10.7554/eLife.94869)
Supplement: Figure 1—source data 1. [file elife-94869-fig1-data1.xlsx]

## Sheet: Figure 1-Panel B
Time (sec)	SWR1C AB-apm-Cy5/AB-apm-Cy5 77N0-Cy3 atp			SWR1C AB-Cy5/AB-Cy5 77N0-Cy3 atp				SWR1C AB-apm-Cy5/AB-apm-Cy5 77N0-Cy3 amp-pnp
0.06	100	100		100	100	100		100	100
3.01	101	99		101	100	100		96	100
4.03	101	97		101	100	100		99	101
5.05	102	101		100	100	100		99	100
6.06	100	99		98	100	97		96	100
7.11	101	100		100	99	96		97	100
8.11	102	97		102	99	96		98	103
9.13	99	100		100	99	98		96	101
10.17	101	100		101	100	95		97	101
11.18	100	98		100	99	96		97	100
12.23	100	99		99	98	97		98	100
13.26	102	100		102	98	95		96	101
14.28	99	100		98	98	96		97	101
15.29	100	100		100	96	96		96	101
16.32	99	99		95	98	97		98	100
17.32	100	99		99	99	93		97	101
18.32	102	98		99	97	95		97	100
19.27	99	99		98	97	95		97	100
20.29	99	99		100	96	94		96	100
21.3	100	99		102	97	94		96	101
22.29	102	99		100	96	94		96	99
23.28	98	99		97	97	95		98	101
24.31	100	99		98	95	92		97	99
25.32	100	97		98	95	94		97	99
26.31	101	99		99	95	95		96	99
27.32	100	97		99	96	93		98	101
28.31	99	98		98	95	94		99	101
29.31	101	98		98	95	93		97	102
30.28	101	98		97	97	94		97	101
31.32	99	98		97	94	91		97	100
32.31	99	100		98	95	93		97	101
33.32	99	97		98	94	94		96	100
34.32	99	98		99	96	93		96	99
35.28	99	99		99	94	91		96	99
36.28	100	99		98	95	91		96	100
37.28	100	100		97	96	92		97	100
38.32	99	97		97	95	92		97	98
39.31	98	99		97	94	93		99	100
40.31	101	98		97	94	92		96	101
41.31	100	99		98	93	91		98	100
42.31	100	98		98	94	90		96	98
43.3	99	97		97	94	92		98	98
44.3	100	98		96	94	91		97	99
45.29	100	99		98	93	91		96	101
46.32	99	98		97	93	89		97	100
47.32	100	98		97	92	91		98	97
48.32	100	97		97	92	90		96	98
49.31	98	98		97	93	89		95	98
50.29	98	99		96	93	88		95	100
51.31	99	97		97	91	92		98	99
52.33	100	98		95	91	91		96	98
53.32	100	98		97	92	89		97	100
54.31	98	99		96	92	90		96	100
55.28	98	98		96	92	91		94	99
56.28	99	98		96	92	89		95	101
57.29	101	97		97	92	91		96	97
58.31	100	98		97	91	90		95	101
59.32	98	97		97	91	89		95	99
60.32	100	99		95	92	87		96	99
61.33	99	97		97	91	87		95	99
62.33	100	98		96	90	90		96	99
63.33	99	98		95	91	90		94	97
64.28	96	100		94	91	90		95	100
65.3	98	99		94	91	88		95	99
66.29	99	97		95	91	90		96	98
67.31	98	97		95	90	88		95	99
68.33	101	98		95	89	90		96	98
69.32	98	98		97	90	87		96	100
70.32	100	100		95	90	89		96	98
71.32	99	98		96	91	88		95	99
72.32	101	98		94	90	87		96	99
73.32	98	98		95	90	87		95	98
74.32	100	98		94	89	87		96	100
75.33	99	96		94	91	86		95	99
76.32	98	97		96	89	86		96	98
77.29	100	98		95	90	88		97	100
78.28	98	98		94	89	87		95	98
79.33	99	98		95	88	86		96	100
80.28	99	97		93	88	86		96	99
81.31	98	97		95	89	89		94	97
82.31	99	96		93	88	86		94	98
83.32	99	97		93	88	84		95	98
84.32	99	97		95	89	86		94	98
85.31	99	98		93	88	85		95	100
86.3	98	98		96	88	86		95	98
87.28	100	98		95	88	86		93	97
88.33	99	97		94	88	84		95	99
89.33	99	98		93	89	86		96	100
90.33	99	96		94	87	86		95	100
91.33	98	98		94	88	86		96	100
92.31	98	98		95	88	87		96	97
93.31	98	97		93	87	84		95	101
94.29	100	97		93	87	84		95	98
95.33	97	99		93	88	84		95	97
96.28	99	98		95	86	86		95	99
97.32	99	97		95	88	84		96	97
98.32	99	97		95	87	84		95	99
99.28	99	98		94	88	84		97	97
100.31	100	96		94	87	85		96	98
101.31	99	96		93	87	83		96	98
102.3	98	98		93	86	87		96	97
103.31	98	99		94	88	83		96	97
104.31	98	98		93	87	85		96	99
105.31	98	97		93	86	85		96	98
106.31	98	97		94	86	84		95	97
107.31	100	98		91	86	85		96	98
108.31	99	97		94	86	85		96	96
109.31	99	96		93	87	85		95	100
110.31	98	95		93	86	85		96	97
111.33	97	98		93	87	85		95	99
112.32	101	97		92	85	85		96	98
113.32	99	97		93	85	83		95	99
114.31	99	97		92	85	83		96	100
115.32	101	96		93	86	84		95	96
116.32	99	97		91	86	82		96	98
117.33	97	96		93	87	84		95	97
118.32	100	98		91	85	81		96	99
119.33	97	97		92	85	82		97	97
120.32	98	98		92	86	83		94	97
121.32	98	96		91	85	84		96	98
122.29	99	97		92	85	82		94	100
123.33	98	97		92	85	85		95	99
124.32	100	96		92	85	83		93	100
125.32	101	97		91	86	82		96	97
126.32	97	97		92	86	83		96	97
127.32	98	96		92	84	83		95	98
128.32	100	97		91	85	84		95	99
129.32	97	98		92	85	83		95	98
130.33	97	96		91	86	82		95	97
131.32	98	97		93	85	81		96	99
132.34	99	98		91	85	81		95	98
133.32	97	97		90	83	83		96	99
134.34	98	97		90	85	80		94	97
135.33	98	97		91	84	82		96	98
136.32	99	97		92	86	82		95	97
137.32	99	97		92	84	81		96	99
138.33	98	95		91	84	81		95	99
139.32	100	97		92	83	83		95	100
140.32	97	96		91	83	83		96	99
141.32	98	96		91	83	82		94	98
142.32	98	96		90	84	82		94	98
143.32	99	97		91	83	82		95	97
144.32	100	97		91	84	82		94	99
145.33	98	96		90	83	82		94	97
146.32	98	96		91	83	81		96	99
147.31	99	96		88	84	83		95	99
148.29	100	98		92	84	81		94	98
149.33	99	96		91	83	82		93	97
150.33	98	95		90	84	81		95	97
151.32	98	97		90	82	80		95	99
152.32	96	96		91	83	81		95	99
153.31	101	97		90	83	80		95	99
154.3	97	96		91	80	80		96	99
155.33	98	97		91	83	81		95	100
156.33	99	98		90	82	78		94	100
157.33	99	96		90	84	79		95	100
158.34	98	96		90	83	81		95	98
159.34	99	98		89	83	81		95	98
160.32	98	96		89	82	79		95	99
161.32	100	97		90	82	80		95	99
162.31	98	96		90	83	82		95	97
163.34	98	95		89	81	82		96	97
164.31	99	97		90	82	80		94	98
165.34	98	96		89	82	80		95	99
166.29	98	95		90	81	80		95	99
167.31	100	97		90	82	80		96	98
168.31	100	96		91	82	81		93	97
169.32	99	96		90	82	81		95	99
170.33	99	96		91	82	79		94	99
171.33	99	96		90	82	79		96	98
172.33	98	96		87	81	79		96	99
173.32	99	97		89	82	77		96	98
174.33	97	95		88	81	78		96	97
175.33	97	96		90	82	80		95	98
176.33	98	96		90	82	80		95	98
177.34	99	96		88	82	79		95	99
178.32	98	97		89	81	79		95	96
179.32	98	97		89	81	78		94	98
180.32	100	97		89	82	77		94	97
181.32	98	97		89	81	80		95	98
182.32	97	95		88	81	79		94	97
185.54	98	96		92	81	79		93	98
186.56	97	95		89	80	78		95	98
187.56	96	96		89	80	79		95	98
188.6	97	95		89	80	78		96	98
189.63	98	98		91	80	77		94	96
190.64	98	98		88	81	78		95	97
191.68	100	97		89	80	79		94	99
192.69	99	96		88	81	79		93	98
193.73	98	96		88	80	78		96	100
194.75	98	96		87	81	79		95	98
195.77	98	94		87	79	79		94	99
196.81	98	98		87	80	79		94	97
197.83	98	97		87	80	78		94	99
198.85	98	96		89	80	79		92	98
199.84	99	94		88	81	76		94	98
200.84	97	95		90	79	77		94	99
201.84	95	97		86	79	79		95	96
202.84	98	97		88	81	76		94	98
203.84	98	94		89	81	76		95	97
204.84	98	95		87	79	79		94	97
205.84	96	95		89	80	77		94	99
206.85	97	95		87	79	77		93	100
207.84	97	96		87	80	76		95	98
208.85	99	96		88	80	76		95	96
209.84	98	95		87	79	78		94	99
210.82	97	94		87	79	76		95	98
211.81	98	94		88	78	77		95	98
212.84	98	97		89	79	76		94	98
213.84	99	97		89	80	75		95	97
214.85	96	95		88	78	77		96	96
215.85	98	96		88	80	78		96	99
216.8	97	95		86	78	75		95	97
217.82	98	98		87	79	76		93	98
218.84	99	97		87	79	77		96	99
219.84	99	96		88	79	75		93	98
220.84	96	96		86	78	78		95	97
221.84	97	96		87	79	76		95	99
222.85	99	95		87	79	75		92	100
223.82	98	95		86	79	77		95	97
224.84	99	95		87	78	75		93	98
225.82	97	94		86	79	76		93	98
226.83	98	97		85	80	77		94	98
227.83	98	96		85	78	75		94	98
228.83	99	97		88	77	77		95	99
229.85	99	96		87	79	78		92	97
230.84	98	96		85	79	78		95	100
231.83	97	97		85	77	79		94	99
232.83	98	95		87	78	76		94	97
233.86	99	96		88	78	76		94	99
234.86	98	95		85	79	76		93	98
235.83	99	96		86	78	75		94	98
236.84	98	96		87	79	75		95	99
237.84	97	96		87	78	75		93	98
238.84	98	97		85	77	76		94	99
239.84	96	95		88	79	76		94	99
240.84	97	97		87	76	76		92	100
241.84	97	94		84	77	77		94	97
242.83	99	96		86	78	77		96	98
243.83	97	96		84	77	75		95	99
244.83	98	97		85	77	75		94	98
245.81	97	95		86	78	74		93	98
246.82	97	96		88	78	75		95	99
247.82	97	96		85	77	77		94	98
248.82	98	96		86	78	75		93	98
249.85	97	95		85	78	76		95	97
250.86	96	95		86	77	75		93	98
251.85	99	95		86	77	77		94	97
252.85	98	97		86	79	78		94	98
253.85	98	95		85	78	74		94	98
254.84	98	96		85	77	76		94	97
255.85	98	95		83	78	75		93	97
256.85	98	95		85	77	75		94	99
257.84	97	95		86	78	76		94	97
258.83	99	98		85	78	73		95	98
259.83	99	96		86	77	76		95	98
260.83	99	96		84	77	75		93	97
261.83	95	96		87	77	75		94	99
262.83	97	96		84	77	76		94	97
263.83	97	95		85	76	74		94	98
264.84	97	95		85	77	74		95	98
265.84	99	96		86	78	75		95	98
266.84	98	96		84	77	74		93	99
267.84	96	95		86	77	75		94	98
268.86	97	95		87	77	74		94	99
269.84	99	95		85	77	74		94	97
270.81	96	96		85	76	73		93	98
271.83	100	95		83	77	74		95	99
272.83	98	96		85	76	74		93	97
273.84	98	96		85	78	74		96	97
274.83	97	95		85	76	75		94	98
275.84	99	96		84	76	74		93	98
276.82	99	96		84	75	74		92	98
277.81	97	95		86	76	74		93	98
278.85	99	95		85	76	74		94	98
279.85	97	94		85	77	73		94	97
280.85	98	94		86	76	75		94	97
281.86	98	97		85	76	74		94	97
282.83	98	94		86	75	75		94	98
283.83	99	95		85	77	74		93	96
284.84	96	96		83	76	74		93	97
285.84	97	96		84	77	74		95	98
286.82	96	97		84	75	73		95	99
287.84	99	97		84	75	74		94	98
288.81	97	96		84	76	73		94	98
289.86	97	95		84	76	73		93	98
290.84	97	96		84	75	73		94	100
291.83	98	97		85	76	74		93	99
292.86	97	95		86	76	73		94	98
293.86	97	95		84	76	74		93	97
294.86	97	98		84	76	74		96	98
295.85	98	96		85	76	74		94	98
296.85	97	95		84	75	72		94	98
297.86	100	96		84	75	74		95	98
298.84	99	96		84	76	74		95	98
299.85	98	95		82	75	75		94	97
300.84	97	96		83	75	72		94	98
301.84	97	95		82	76	71		93	98
302.84	97	95		84	75	73		94	99
303.85	96	95		84	76	75		94	98
304.85	98	96		84	76	72		93	98
305.85	97	96		84	75	74		93	99
306.85	99	94		83	76	73		92	97
307.86	98	96		83	75	75		95	97
308.85	97	94		83	75	72		94	98
309.85	97	96		84	74	72		96	99
310.86	97	94		82	76	72		93	98
311.84	99	95		84	75	73		94	99
312.82	96	95		83	75	74		94	97
313.82	97	94		83	75	74		95	97
314.84	98	97		83	76	72		94	98
315.85	99	95		83	74	71		93	100
316.85	98	94		84	75	74		92	99
317.84	98	98		82	73	73		94	100
318.83	97	95		84	74	73		93	99
319.82	98	95		83	75	74		95	99
320.85	96	95		85	75	73		95	98
321.85	99	96		84	75	73		92	99
322.85	96	96		83	75	74		93	98
323.86	98	95		85	74	71		94	98
324.84	97	96		82	74	73		93	97
325.85	99	95		83	74	73		93	98
326.86	97	93		82	75	74		93	98
327.86	97	96		81	74	73		94	98
328.83	97	95		83	75	73		94	97
329.82	99	94		83	75	71		93	99
330.86	98	96		82	75	72		94	99
331.83	98	95		82	73	74		93	97
332.87	98	94		84	75	74		92	97
333.84	96	96		83	75	70		94	98
334.84	97	95		82	74	73		93	97
335.84	99	94		83	74	72		93	99
336.82	99	95		83	75	71		93	99
337.87	96	94		83	74	72		92	98
338.82	95	95		83	73	72		94	98
339.87	97	95		82	74	73		93	98
340.82	96	96		83	74	73		93	99
341.84	99	93		82	74	73		94	97
342.84	97	94		82	74	70		95	98
343.84	97	95		81	74	69		94	97
344.85	97	95		82	74	72		95	98
345.85	98	96		82	74	73		94	98
346.85	98	95		83	73	71		94	98
347.85	98	95		82	75	70		94	98
348.85	98	94		81	74	71		94	98
349.85	96	97		81	73	70		93	98
350.85	97	97		82	73	72		93	97
351.86	98	95		81	73	72		94	99
352.84	98	95		82	73	73		93	98
353.83	96	95		82	75	72		94	97
354.82	96	96		83	72	71		94	99
355.87	97	92		83	74	72		94	98
356.83	98	97		83	74	69		93	97
357.85	98	96		82	73	72		94	98
358.87	98	95		82	74	71		93	97
359.86	98	96		82	73	72		93	98
360.85	97	95		82	73	72		94	97
361.86	96	95		81	73	71		95	97
362.86	99	93		82	73	72		94	99
363.87	97	95		81	74	71		92	98
364.85	95	95		81	72	71		96	99
368	96	96		81	72	71		95	99
369.02	97	97		81	73	71		94	98
370.02	96	96		80	72	71		95	99
371.07	96	95		82	74	71		94	98
372.08	98	96		81	72	70		93	99
373.11	98	95		80	72	70		93	98
374.11	98	95		80	72	70		94	98
375.16	97	96		81	72	70		94	100
376.18	98	94		81	73	71		96	99
377.21	97	96		82	72	71		94	99
378.24	98	96		82	73	70		93	98
379.26	96	95		81	73	71		93	99
380.27	98	95		80	72	72		95	99
381.31	96	94		81	72	72		95	99
382.31	99	95		83	73	70		95	97
383.32	96	96		80	73	71		96	98
384.3	99	95		82	72	70		95	99
385.29	94	97		79	72	69		94	99
386.3	96	95		80	73	69		94	100
387.31	97	95		82	72	70		95	98
388.28	98	95		80	73	71		95	98
389.27	98	95		80	72	73		93	99
390.32	97	96		81	74	72		95	99
391.31	97	95		81	72	70		93	98
392.32	97	94		81	72	70		96	99
393.31	97	95		80	72	72		93	98
394.32	98	95		79	72	70		95	99
395.31	97	96		81	72	70		95	100
396.31	97	96		80	71	69		93	100
397.31	96	95		80	73	72		94	98
398.31	98	95		80	72	70		94	99
399.32	96	95		79	71	70		94	99
400.31	96	96		80	72	71		94	98
401.31	98	95		82	72	70		94	99
402.3	97	95		82	72	71		93	98
403.28	95	95		79	72	69		94	97
404.32	96	94		79	72	71		95	98
405.32	97	95		81	73	71		95	100
406.31	97	94		80	72	70		94	99
407.31	96	96		80	72	68		95	98
408.31	96	94		82	71	72		94	99
409.31	96	95		81	72	70		94	99
410.32	96	94		78	71	70		96	100
411.3	97	94		79	71	69		95	98
412.27	97	96		79	72	69		94	99
413.32	97	95		79	71	69		95	97
414.31	97	96		79	72	69		94	99
415.31	100	96		81	71	70		94	98
416.3	97	93		82	72	70		95	98
417.31	99	96		79	72	71		94	97
418.3	98	96		80	71	70		95	101
419.3	97	94		79	72	71		94	98
420.3	97	94		79	72	70		94	98
421.32	97	94		78	72	70		93	99
422.27	97	96		80	73	70		94	99
423.31	98	95		80	72	70		95	98
424.31	97	95		81	71	69		95	99
425.32	97	94		81	71	69		94	98
426.3	99	94		79	71	69		95	98
427.28	95	95		80	71	71		92	100
428.3	96	95		81	72	69		95	97
429.3	96	95		79	71	69		95	97
430.29	96	95		80	71	72		94	99
431.31	96	94		80	71	71		95	97
432.31	96	96		80	71	69		96	99
433.3	97	95		79	71	68		93	100
434.32	95	96		78	70	70		96	97
435.32	96	94		80	70	69		94	98
436.29	95	95		81	71	71		95	98
437.31	97	95		79	71	70		95	99
438.31	95	95		81	70	69		94	99
439.31	97	95		78	71	71		95	100
440.31	97	96		80	71	70		93	99
441.31	97	93		80	72	69		94	98
442.32	96	96		78	71	71		93	99
443.31	96	95		79	70	70		95	98
444.31	97	95		79	72	69		94	99
445.31	95	93		78	70	68		95	99
446.31	97	95		78	71	68		93	97
447.3	98	96		78	71	69		94	99
448.32	97	96		80	70	68		95	99
449.29	96	94		79	71	70		94	98
450.29	96	96		79	71	70		93	99
451.28	97	96		79	70	69		94	98
452.32	94	96		77	71	68		97	99
453.27	97	95		79	70	68		91	99
454.32	96	93		77	71	70		94	99
455.32	97	95		79	70	68		95	98
456.32	97	94		79	70	67		94	98
457.32	100	95		79	71	68		95	100
458.33	97	95		79	70	68		94	98
459.31	96	95		79	70	69		93	99
460.31	97	97		79	70	68		94	98
461.31	96	94		78	70	68		94	99
462.28	97	95		78	71	68		93	100
463.3	98	95		78	69	71		95	98
464.3	97	95		78	70	71		92	97
465.28	94	96		79	70	70		94	98
466.3	97	95		79	70	70		94	98
467.3	96	95		80	70	69		96	99
468.31	95	96		78	70	70		96	98
469.29	96	95		78	70	68		94	98
470.32	95	95		78	70	67		95	98
471.31	98	94		79	70	68		94	97
472.31	96	94		80	70	69		94	99
473.29	96	95		78	70	68		95	99
474.32	97	95		78	70	67		93	97
475.32	97	96		78	70	67		95	99
476.32	97	95		78	72	69		95	100
477.31	95	94		76	70	69		93	97
478.31	97	95		78	69	70		95	99
479.29	97	94		78	71	66		96	96
480.33	97	93		78	70	70		94	97
481.33	96	95		77	69	68		94	97
482.32	96	95		78	70	67		94	99
483.32	98	94		79	70	67		94	98
484.32	94	94		77	70	68		94	98
485.33	97	95		76	71	68		93	98
486.28	98	94		77	69	69		95	99
487.31	97	93		78	68	68		95	97
488.31	96	93		77	70	67		93	98
489.31	97	96		78	70	67		94	98
490.29	96	96		76	70	68		92	99
491.34	96	96		78	69	69		94	98
492.31	98	95		80	70	65		92	99
493.34	96	96		77	69	66		94	99
494.3	96	94		77	69	68		96	99
495.29	95	96		78	70	68		94	97
496.28	96	96		78	69	67		93	98
497.28	98	95		77	69	67		93	100
498.31	97	97		77	70	69		95	98
499.31	97	94		76	70	67		94	98
500.32	96	93		77	70	65		94	99
501.31	97	96		76	69	67		95	100
502.34	97	94		78	69	67		93	99
503.3	96	97		78	70	67		94	98
504.31	96	94		77	70	68		95	99
505.29	97	95		76	69	66		94	98
506.28	97	94		77	69	69		92	100
507.29	96	95		77	69	67		93	99
508.32	97	94		76	69	68		94	98
509.32	97	94		76	69	68		94	100
510.32	94	95		76	70	67		93	98
511.32	96	94		78	69	66		94	101
512.33	98	94		77	69	68		94	99
513.33	95	94		77	69	68		93	99
514.32	96	94		77	69	69		94	98
515.32	96	94		77	69	67		95	99
516.28	96	95		77	69	68		94	97
517.33	96	95		77	69	69		95	99
518.33	96	96		78	69	68		92	99
519.32	96	94		78	70	68		94	98
520.32	95	95		76	70	67		96	100
521.31	98	94		77	69	67		96	96
522.28	97	96		77	68	68		93	100
523.33	96	95		76	69	69		95	97
524.34	98	94		76	69	67		94	98
525.33	97	96		76	69	66		94	98
526.32	95	94		77	68	66		95	100
527.33	95	94		76	69	69		95	100
528.33	95	95		76	70	65		94	99
529.29	96	95		75	70	67		93	99
530.32	97	95		78	68	68		94	99
531.31	95	95		77	68	67		94	99
532.3	97	95		77	70	68		94	99
533.28	96	94		76	69	68		94	100
534.33	97	96		76	68	67		94	98
535.28	95	96		74	69	65		96	99
536.33	96	93		74	69	69		94	100
537.32	96	94		76	67	66		93	100
538.32	97	95		77	69	68		93	98
539.32	96	93		75	68	67		95	100
540.32	95	96		75	69	67		94	100
541.3	95	94		77	69	67		95	97
542.29	98	96		77	69	65		95	101
543.3	94	94		76	69	67		95	100
544.31	96	95		77	68	68		93	98
545.32	97	94		77	70	69		93	100
546.33	97	96		76	68	66		93	99
547.33	98	95		75	69	67		93	99
550.57	96	96		77	68	66		93	100
551.58	96	95		76	68	67		93	100
552.61	97	94		74	68	68		94	100
553.62	96	93		77	68	66		92	99
554.63	98	94		76	68	66		95	99
555.67	95	95		77	70	67		94	99
556.7	96	94		77	68	64		92	99
557.73	95	94		76	69	66		95	100
558.76	97	96		75	68	67		94	99
559.75	97	95		76	68	69		94	99
560.81	97	93		75	69	66		93	100
561.81	96	92		77	68	66		95	99
562.87	96	94		76	69	65		92	98
563.88	96	95		77	69	66		93	99
564.87	96	95		77	69	67		93	99
565.85	95	95		76	68	66		94	99
566.89	96	94		77	68	66		93	99
567.87	96	93		77	68	65		93	99
568.86	95	94		76	68	65		92	99
569.88	95	94		77	67	67		96	98
570.89	95	94		76	67	67		92	99
571.87	95	94		76	68	66		93	99
572.87	95	96		76	68	68		93	100
573.89	96	96		75	68	66		95	99
574.89	96	94		76	67	66		95	99
575.89	96	97		75	67	65		94	100
576.89	96	92		76	68	67		93	100
577.9	95	94		76	67	65		92	98
578.89	97	93		75	67	67		93	100
579.88	96	95		75	69	67		93	99
580.88	96	95		75	68	67		92	98
581.9	97	94		76	67	66		93	98
582.85	97	93		75	68	66		92	99
583.89	96	95		75	69	65		95	100
584.89	96	94		74	68	64		94	101
585.89	98	93		74	68	67		94	99
586.89	97	96		77	67	65		94	100
587.89	96	94		76	67	67		91	97
588.89	97	94		77	68	65		94	98
589.88	97	94		76	68	66		92	99
590.88	97	94		76	66	66		94	99
591.88	97	94		76	67	68		92	100
592.89	96	93		76	67	68		94	99
593.88	95	94		75	67	66		93	97
594.86	95	95		75	67	65		94	99
595.87	94	93		76	67	66		93	99
596.88	96	92		75	67	66		94	99
597.89	96	93		74	68	67		92	99
598.88	97	94		76	66	66		92	99
599.87	96	94		75	68	66		95	99
600.86	95	94		74	68	67		93	99
601.9	96	93		75	67	66		95	98
602.9	96	93		75	67	66		92	99
603.89	95	95		74	67	65		92	99
604.85	94	94		77	68	65		92	99
605.89	95	93		75	67	65		93	99
606.89	97	94		75	67	64		92	99
607.89	95	95		76	67	65		93	95
608.9	97	95		74	66	66		95	100
609.89	96	95		74	68	67		93	97
610.89	97	94		76	67	65		92	99
611.89	96	94		76	67	67		93	99
612.9	97	95		76	68	66		93	99
613.9	95	95		76	67	64		95	100
614.9	95	94		74	68	65		92	99
615.89	95	93		74	68	66		92	99
616.89	97	93		75	67	65		93	99
617.89	95	94		74	68	67		93	97
618.9	97	93		75	67	68		93	98
619.9	96	96		74	67	64		94	99
620.9	97	94		74	67	65		92	97
621.88	98	93		74	66	65		93	97
622.88	96	93		75	67	65		94	100
623.89	95	94		74	67	65		92	99
624.9	96	96		73	67	66		93	98
625.88	95	96		76	68	65		93	99
626.89	97	93		74	67	66		93	98
627.89	96	94		74	66	65		93	99
628.89	96	94		75	67	66		92	98
629.9	96	95		75	67	65		93	98
630.89	93	93		75	68	66		93	99
631.9	96	92		75	66	65		94	98
632.88	97	95		74	67	65		92	98
633.88	95	93		75	67	64		93	99
634.88	96	93		73	66	65		95	99
635.86	96	94		74	66	65		93	99
636.9	96	92		76	68	65		93	98
637.9	94	93		74	67	65		92	98
638.9	96	94		75	66	65		93	100
639.9	93	93		75	68	63		94	98
640.9	97	94		74	66	64		95	98
641.9	95	94		74	66	64		93	99
642.9	95	94		74	67	65		94	96
643.87	97	92		73	65	65		94	96
644.9	96	94		74	68	62		93	96
645.87	96	93		74	66	66		94	99
646.88	97	94		73	67	66		94	97
647.9	96	94		74	67	65		94	96
648.88	97	94		73	67	65		94	96
649.86	95	93		73	67	65		92	96
650.89	96	94		73	65	64		92	96
651.9	97	94		75	66	66		93	95
652.89	95	93		75	66	66		92	96
653.89	96	94		74	67	65		94	97
654.89	95	94		74	66	66		92	97
655.89	97	92		73	66	65		94	95
656.89	96	95		74	67	63		94	97
657.89	95	94		75	67	65		93	98
658.89	97	94		74	67	65		93	98
659.86	95	94		75	66	66		93	96
660.91	98	93		74	67	63		95	97
661.91	96	93		72	66	64		93	96
662.89	95	95		74	67	65		94	96
663.89	95	95		73	67	64		96	97
664.9	97	94		73	66	65		93	98
665.89	97	94		74	65	64		93	97
666.89	96	93		74	66	66		93	97
667.89	96	95		74	66	63		94	96
668.9	96	94		74	67	66		93	97
669.9	98	94		74	66	65		91	97
670.86	97	94		74	66	63		95	98
671.86	96	94		72	65	66		92	97
672.86	95	95		73	65	65		93	97
673.88	95	94		74	65	65		94	96
674.88	98	93		73	66	61		93	97
675.89	97	93		74	66	66		92	96
676.89	96	94		73	66	65		95	98
677.89	96	93		73	66	65		91	97
678.9	95	95		74	66	67		94	97
679.9	97	95		74	65	64		94	97
680.9	96	93		74	66	64		93	96
681.87	95	93		74	66	65		93	98
682.9	97	92		72	65	65		92	98
683.91	95	92		74	66	61		93	98
684.91	97	95		75	66	65		92	97
685.87	95	93		73	66	65		93	97
686.89	96	94		74	66	64		93	99
687.89	95	94		72	66	63		91	95
688.91	96	95		72	66	65		93	95
689.91	93	94		75	66	64		92	97
690.88	96	94		72	66	63		91	96
691.89	96	94		73	66	63		91	96
692.88	96	94		72	65	65		94	96
693.88	96	93		73	67	64		92	97
694.88	95	93		75	65	63		94	97
695.88	96	94		72	66	63		94	97
696.88	96	93		73	66	64		93	96
697.9	94	94		73	65	64		92	98
698.9	95	93		73	66	64		94	97
699.9	95	93		73	66	62		92	95
700.9	96	94		72	66	65		93	97
701.9	95	93		73	66	63		93	98
702.9	97	94		72	66	63		93	98
703.9	96	93		74	66	64		94	98
704.91	97	94		73	66	62		93	97
705.87	95	93		74	66	64		94	95
706.91	96	93		73	66	66		95	97
707.89	95	92		74	65	64		94	96
708.89	95	93		73	66	64		94	97
709.89	98	93		73	65	65		92	97
710.87	96	93		72	66	63		93	96
711.9	96	93		73	66	65		94	97
712.9	96	96		72	65	65		92	96
713.9	96	95		72	65	62		93	97
714.9	95	93		73	66	62		94	97
715.91	96	94		74	65	63		93	97
716.9	95	94		75	65	65		93	97
717.9	96	95		72	65	65		93	96
718.9	95	91		73	65	64		92	97
719.86	96	93		73	65	64		92	96
720.91	94	93		71	65	62		93	97
721.88	95	94		72	66	65		92	97
722.9	97	92		71	65	64		94	96
723.9	96	92		72	65	63		94	96
724.9	96	93		72	65	64		92	95
725.9	94	94		75	65	62		94	95
726.91	96	93		73	65	64		94	98
727.86	95	95		73	66	65		95	96
728.9	96	93		73	66	64		93	97
729.9	96	95		75	66	64		92	96
732.92	97	95		72	65	65		92	97
733.95	97	94		73	66	65		94	95
734.99	96	94		72	65	65		94	98
735.98	95	95		73	65	64		94	98
737.03	96	94		73	66	63		95	95
738.04	97	94		74	64	64		94	95
739.06	94	95		73	66	65		92	96
740.09	96	95		72	66	64		95	97
741.11	96	94		74	66	64		93	96
742.13	95	94		73	65	63		94	94
743.17	95	94		73	66	62		95	96
744.18	96	95		73	66	64		94	96
745.21	95	95		73	66	65		94	96
746.21	94	93		73	66	64		94	96
747.24	96	94		73	66	65		93	98
748.19	95	95		72	66	63		95	97
749.24	96	93		71	66	66		93	96
750.24	95	92		72	66	64		94	96
751.22	95	94		72	65	64		93	95
752.23	94	94		74	65	65		95	97
753.23	96	94		72	66	63		94	97
754.24	95	94		73	65	64		93	96
755.23	96	92		73	66	62		94	97
756.22	96	96		72	64	65		94	96
757.23	95	91		72	65	63		93	97
758.23	95	93		71	66	65		94	96
759.24	94	94		72	65	63		95	95
760.23	95	93		72	66	64		92	94
761.23	95	92		74	65	63		92	95
762.23	96	94		72	66	64		93	96
763.24	95	94		73	66	65		93	95
764.19	97	94		72	66	65		92	96
765.19	97	93		72	66	64		94	96
766.24	95	94		73	65	64		93	97
767.23	95	95		71	66	63		94	95
768.23	93	94		72	66	63		93	96
769.23	98	93		73	66	62		93	97
770.22	94	93		71	65	63		93	94
771.23	96	94		72	65	66		95	94
772.23	96	94		72	65	64		94	95
773.22	96	94		72	65	63		93	95
774.23	94	93		72	64	64		92	97
775.23	95	94		72	65	62		94	95
776.23	96	92		71	66	65		94	95
777.22	95	95		72	66	64		93	97
778.23	96	94		72	65	63		94	95
779.21	95	94		72	65	63		92	97
780.22	95	93		73	65	65		95	96
781.2	96	96		72	65	63		92	96
782.23	96	93		73	64	63		94	95
783.23	97	95		72	65	64		95	95
784.23	95	94		71	65	63		95	96
785.24	95	94		73	66	62		94	95
786.24	95	94		71	66	65		93	98
787.22	96	95		72	64	64		95	96
788.23	97	94		74	65	62		94	94
789.23	95	95		73	66	62		93	95
790.22	97	93		73	66	65		93	97
791.22	97	94		70	64	62		94	95
792.22	97	92		71	65	63		95	95
793.22	95	93		73	66	65		93	96
794.23	96	94		73	65	63		93	95
795.22	95	93		71	65	64		95	97
796.22	95	94		72	65	63		94	96
797.22	95	94		71	66	64		95	96
798.21	96	93		72	67	62		93	96
799.22	96	94		73	64	63		91	96
800.22	94	94		70	65	64		93	96
801.22	96	94		72	64	64		94	95
802.23	95	94		71	64	64		94	96
803.23	95	96		72	65	63		96	96
804.23	94	92		71	65	62		94	96
805.23	95	93		73	66	62		93	97
806.23	94	93		73	66	65		94	95
807.23	93	92		71	65	63		94	96
808.23	96	94		72	65	63		93	95
809.23	95	92		69	66	64		94	96
810.21	94	93		71	64	64		94	96
811.21	95	94		70	65	62		92	95
812.21	97	94		72	64	64		96	96
813.22	96	93		72	65	64		95	94
814.21	96	93		73	65	63		94	95
815.23	94	94		70	64	62		93	94
816.24	96	92		71	64	63		94	94
817.23	95	95		71	65	63		95	94
818.23	94	93		71	66	64		94	96
819.23	93	93		70	64	63		93	96
820.22	97	93		73	65	62		93	96
821.22	95	94		70	64	62		94	94
822.22	96	95		72	66	64		94	96
823.22	96	93		70	65	64		95	96
824.23	94	93		73	65	63		94	96
825.23	96	95		71	64	63		94	96
826.23	94	93		70	64	62		93	94
827.22	95	92		71	64	64		93	97
828.23	94	93		70	65	62		93	94
829.23	95	93		70	64	64		92	95
830.23	95	94		71	65	62		93	96
831.23	97	94		70	65	63		93	97
832.21	95	92		70	64	62		94	96
833.22	96	94		71	64	63		94	95
834.22	95	93		73	65	62		94	95
835.23	95	95		72	65	62		94	96
836.23	97	92		72	65	64		94	95
837.23	96	94		71	65	65		94	95
838.23	95	94		71	65	62		93	97
839.24	95	94		72	65	62		93	94
840.24	95	93		70	65	62		94	96
841.24	94	93		69	64	62		93	97
842.23	95	94		72	65	64		92	95
843.22	95	93		70	64	62		94	95
844.21	96	94		72	65	63		93	96
845.25	95	92		71	65	62		94	96
846.2	96	92		69	65	62		94	95
847.24	95	93		70	65	61		93	95
848.24	94	95		71	63	63		93	95
849.25	96	94		71	65	62		93	96
850.24	94	93		70	64	63		93	96
851.24	95	95		70	65	63		93	95
852.24	95	95		72	65	64		93	95
853.24	94	93		70	65	62		93	96
854.24	95	96		71	64	61		92	95
855.24	97	94		71	65	61		95	97
856.25	94	95		71	64	62		92	95
857.23	94	95		71	65	62		94	96
858.24	96	93		70	64	62		95	96
859.23	95	93		72	64	63		94	94
860.23	96	93		70	64	63		93	94
861.23	95	93		72	64	63		92	96
862.23	97	92		70	65	61		93	96
863.22	96	93		70	63	62		93	95
864.25	94	93		70	65	63		95	95
865.24	96	94		72	64	62		92	94
866.24	96	93		70	64	62		92	96
867.25	94	92		71	65	64		91	96
868.24	97	95		72	65	61		93	95
869.24	97	93		71	64	63		92	96
870.24	96	93		70	64	63		94	95
871.24	96	92		71	64	62		94	96
872.25	98	94		70	65	61		93	95
873.23	95	93		70	64	61		94	95
874.22	95	94		71	63	63		93	97
875.24	94	94		70	64	62		94	96
876.25	95	93		70	65	62		92	97
877.23	94	94		70	65	63		93	95
878.24	95	93		68	64	62		94	96
879.24	95	93		70	63	60		95	96
880.24	95	96		70	66	61		94	97
881.23	95	94		71	64	61		92	93
882.23	95	94		69	63	62		95	95
883.23	95	95		70	64	62		92	97
884.22	94	93		71	64	65		93	95
885.22	92	95		71	64	63		92	96
886.22	95	94		71	65	63		95	97
887.22	95	93		70	63	62		94	96
888.23	95	95		70	64	62		94	97
889.23	96	92		70	64	63		94	94
890.24	95	93		70	65	63		94	96
891.24	94	93		70	63	62		94	95
892.23	95	92		69	64	64		94	95
893.23	93	93		70	65	63		92	95
894.21	95	91		70	64	62		94	95
895.22	96	94		70	65	63		94	96
896.23	95	93		71	65	62		93	95
897.22	94	92		71	63	62		94	98
898.22	96	93		71	64	63		95	96
899.25	96	95		70	64	63		94	96
900.23	95	94		70	64	63		93	95
901.23	95	94		71	64	62		92	96
902.23	94	94		69	65	62		93	97
903.22	96	93		70	65	62		94	97
904.23	94	95		70	65	63		94	97
905.24	95	93		70	63	63		92	96
906.24	95	93		70	64	62		94	96
907.26	95	94		69	65	63		94	95
908.26	95	94		68	63	63		91	94
909.24	93	93		70	65	63		92	96
910.24	94	93		70	64	63		92	96
911.24	96	94		70	64	62		92	94
912.24	94	93		70	64	60		94	97
915.31	95	91		70	64	63		94	94
916.34	93	93		70	63	62		94	95
917.37	94	95		70	64	61		94	96
918.39	96	92		69	63	62		93	97
919.4	94	94		70	63	61		93	97
920.42	93	93		68	64	62		93	95
921.43	93	92		71	62	61		94	96
922.47	94	93		70	63	62		94	95
923.49	95	92		70	62	63		93	96
924.52	93	91		70	64	60		93	97
925.54	95	93		70	64	62		94	96
926.56	96	94		70	64	61		93	97
927.59	95	91		67	63	61		93	96
928.61	93	93		69	63	61		94	98
929.61	95	93		68	63	63		93	96
930.61	96	92		68	63	62		95	98
931.61	93	94		69	64	61		94	97
932.61	96	92		68	64	62		92	96
933.62	95	93		68	63	61		93	96
934.61	96	93		68	64	62		93	94
935.61	94	92		69	64	61		93	96
936.61	96	91		70	64	62		94	95
937.62	93	93		68	64	61		93	95
938.62	94	92		68	64	62		94	95
939.6	96	94		69	62	60		94	95
940.6	94	93		70	63	60		94	97
941.6	94	92		70	63	61		94	95
942.58	94	93		67	64	61		94	97
943.62	95	93		68	64	61		94	96
944.59	95	91		69	64	61		94	97
945.61	94	91		69	64	61		93	94
946.61	95	93		69	64	63		95	96
947.62	95	92		68	63	61		92	94
948.62	94	91		68	63	63		93	95
949.62	95	93		69	63	61		93	97
950.61	95	93		69	64	61		93	96
951.61	94	93		67	63	60		93	96
952.62	95	93		67	63	61		94	96
953.62	95	91		68	63	62		94	97
954.58	93	92		68	64	62		94	95
955.58	94	93		70	64	62		93	96
956.63	94	91		68	63	62		93	97
957.59	93	92		68	63	60		93	96
958.57	95	91		69	63	61		93	96
959.62	93	92		69	63	63		95	96
960.63	94	92		70	63	61		93	96
961.61	95	93		70	63	60		95	95
962.61	95	93		68	65	61		93	94
963.61	95	93		69	64	61		94	96
964.61	96	91		68	65	61		94	95
965.61	95	93		68	63	62		95	96
966.61	94	94		69	64	61		94	96
967.62	94	94		69	63	61		94	97
968.62	94	92		69	64	61		93	97
969.62	95	91		69	64	62		92	96
970.58	94	92		70	63	61		93	95
971.62	94	92		69	63	60		92	96
972.62	95	91		69	63	61		92	95
973.61	96	94		68	64	60		93	95
974.62	93	92		67	63	61		94	95
975.62	94	93		69	62	61		93	96
976.62	95	92		68	63	59		93	95
977.63	95	94		68	63	61		93	97
978.59	94	91		69	63	62		93	96
979.63	91	92		68	64	61		93	96
980.63	94	95		69	64	61		95	96
981.63	93	91		69	63	61		93	95
982.62	95	92		68	64	61		95	96
983.63	93	92		70	64	61		93	96
984.62	96	93		68	62	62		93	95
985.58	93	92		70	62	61		93	96
986.58	94	94		69	63	62		94	96
987.61	95	92		68	63	60		94	97
988.61	91	91		69	64	61		94	96
989.59	95	91		68	62	61		95	97
990.61	94	92		69	63	60		93	95
991.62	95	93		68	63	62		95	96
992.63	94	91		69	64	60		94	96
993.6	95	92		69	63	62		93	96
994.6	95	93		68	63	62		93	97
995.6	94	92		68	62	61		93	94
996.61	94	93		68	63	61		94	95
997.6	94	91		69	62	64		93	96
998.6	95	93		67	62	60		92	95
999.6	94	91		68	63	63		93	95
1000.62	94	92		69	62	60		93	94
1001.63	95	93		70	62	60		93	97
1002.63	97	91		69	63	62		94	96
1003.63	93	93		67	62	60		94	97
1004.58	95	92		68	62	60		94	95
1005.63	95	93		68	63	59		93	97
1006.59	94	92		69	62	61		95	94
1007.63	94	91		68	62	62		94	96
1008.62	95	93		67	63	61		92	95
1009.62	93	92		69	62	61		94	97
1010.63	94	94		68	62	61		93	98
1011.62	94	94		68	63	61		93	97
1012.59	94	92		67	62	60		93	94
1013.58	94	90		68	63	60		91	98
1014.63	95	92		69	64	61		93	96
1015.58	95	92		69	63	59		95	95
1016.61	96	93		69	61	60		94	95
1017.58	95	91		67	61	62		94	96
1018.58	94	93		68	63	61		93	95
1019.62	95	92		69	62	62		93	96
1020.62	94	92		67	63	59		94	96
1021.58	93	92		67	62	60		93	95
1022.59	94	93		69	62	62		94	97
1023.63	93	92		68	63	60		93	95
1024.63	94	94		70	62	59		93	96
1025.62	95	92		67	62	61		94	96
1026.62	94	90		68	63	59		94	94
1027.61	92	93		68	63	61		93	95
1028.61	94	93		68	63	59		95	96
1029.6	94	93		67	63	62		93	95
1030.63	93	92		68	62	61		92	96
1031.63	94	90		68	63	59		95	95
1032.61	94	92		69	64	62		94	97
1033.59	95	93		68	63	60		94	94
1034.63	94	91		68	62	62		94	95
1035.63	95	94		67	63	60		92	96
1036.62	94	91		68	63	60		94	97
1037.58	94	93		67	62	60		92	96
1038.63	95	93		67	63	61		92	96
1039.63	96	92		68	63	60		94	96
1040.58	93	91		68	62	64		95	98
1041.6	94	91		68	63	61		95	96
1042.6	94	92		68	61	61		93	97
1043.63	93	92		69	63	61		94	96
1044.64	93	93		68	63	60		93	95
1045.59	92	92		67	63	63		95	96
1046.63	95	91		68	63	59		92	95
1047.64	95	91		67	63	60		95	95
1048.6	95	93		67	62	60		94	95
1049.64	93	94		67	61	61		93	97
1050.64	95	93		68	61	62		94	96
1051.58	93	91		66	62	61		94	95
1052.62	95	91		69	63	62		93	97
1053.62	93	92		68	62	59		94	96
1054.63	95	92		69	62	59		94	95
1055.63	92	91		67	62	62		92	94
1056.58	95	91		68	62	61		93	97
1057.63	95	93		67	62	60		95	96
1058.62	94	92		68	62	60		93	94
1059.62	93	92		66	62	59		94	95
1060.62	94	91		68	61	59		93	96
1061.63	96	93		68	63	60		94	95
1062.63	94	91		67	62	60		93	94
1063.63	94	93		68	62	61		93	97
1064.59	95	91		68	62	59		91	94
1065.64	94	92		68	62	58		93	96
1066.64	95	92		68	62	60		92	95
1067.61	95	93		68	62	60		94	95
1068.61	93	91		69	62	61		93	97
1069.64	94	92		69	62	61		93	96
1070.6	94	92		66	63	59		93	96
1071.59	94	90		68	63	59		93	95
1072.59	95	91		67	63	60		95	96
1073.63	93	91		68	62	60		93	96
1074.61	92	92		68	62	61		92	96
1075.62	93	91		67	61	59		93	95
1076.64	94	92		67	63	59		93	95
1077.62	95	93		67	62	61		93	95
1078.62	95	92		67	63	61		92	95
1079.62	93	92		69	63	60		91	94
1080.63	93	92		67	62	62		92	96
1081.62	94	90		68	62	59		94	96
1082.61	95	92		67	63	61		94	95
1083.63	93	90		67	62	60		95	95
1084.63	94	92		67	61	60		95	95
1085.62	94	94		65	62	61		94	97
1086.62	95	91		65	62	60		93	96
1087.62	93	92		68	63	60		94	96
1088.59	92	93		66	62	62		92	94
1089.64	94	90		67	62	61		94	96
1090.64	95	93		66	64	60		94	95
1091.59	94	92		67	62	60		93	97
1092.64	94	91		67	61	60		94	95
1093.64	94	92		66	62	58		94	95
1094.63	94	91		69	62	59		94	97
1097.8	93	92		67	63	60		92	96
1098.84	96	92		65	63	60		93	97
1099.85	94	91		67	62	59		93	95
1100.85	93	92		65	62	57		92	95
1101.89	95	91		66	61	59		92	98
1102.9	94	93		67	62	59		94	97
1103.94	95	92		65	61	60		93	96
1104.99	95	92		67	63	61		94	95
1105.99	94	93		65	62	60		93	96
1107.02	93	92		66	62	58		93	94
1108.05	95	92		65	61	60		93	95
1109.04	96	92		67	62	61		94	97
1110.08	94	94		65	61	58		94	95
1111.11	94	92		66	62	62		94	95
1112.12	94	93		65	62	59		93	95
1113.1	96	93		67	61	62		94	97
1114.09	93	92		66	61	61		94	95
1115.12	94	93		68	60	58		94	95
1116.08	94	91		66	62	60		93	96
1117.08	94	91		67	62	61		93	96
1118.07	92	93		65	62	59		94	96
1119.11	94	91		65	61	60		93	96
1120.12	94	92		66	62	59		91	96
1121.12	94	91		65	62	58		92	97
1122.11	93	93		66	61	60		94	96
1123.12	95	92		67	61	59		92	95
1124.08	93	92		66	61	59		93	95
1125.08	92	93		65	62	59		93	95
1126.08	94	94		67	62	61		95	98
1127.08	93	91		67	61	60		92	96
1128.12	94	92		66	63	59		93	95
1129.12	94	94		67	62	60		93	96
1130.13	95	92		68	62	61		93	97
1131.12	93	92		67	62	60		94	95
1132.13	95	93		67	62	57		93	96
1133.09	94	92		67	62	60		94	96
1134.11	95	93		66	62	60		93	96
1135.11	94	92		65	62	59		93	96
1136.11	94	91		66	62	61		95	96
1137.12	93	91		67	61	59		95	97
1138.12	93	92		65	61	59		93	97
1139.08	93	92		68	63	60		93	93
1140.1	96	92		67	61	58		91	96
1141.11	94	92		66	62	59		94	95
1142.13	93	93		67	61	60		94	98
1143.11	95	91		65	62	60		94	97
1144.12	95	93		67	62	60		92	99
1145.12	94	92		66	62	58		92	94
1146.12	95	92		65	62	59		92	94
1147.11	94	92		67	62	60		93	97
1148.12	95	92		68	61	60		93	95
1149.12	94	93		65	61	61		93	96
1150.12	94	91		65	61	59		92	97
1151.12	95	91		66	61	61		93	95
1152.12	94	92		66	61	61		93	96
1153.12	95	92		65	61	60		92	96
1154.11	95	92		66	63	61		95	95
1155.13	93	92		65	61	59		94	98
1156.1	92	93		66	62	58		93	97
1157.11	94	92		65	62	59		93	97
1158.11	95	92		66	62	59		93	97
1159.11	93	93		65	62	60		93	97
1160.1	95	92		66	61	58		94	95
1161.08	93	92		66	63	60		93	97
1162.12	94	93		66	62	60		92	97
1163.11	94	92		66	61	58		93	96
1164.11	94	93		65	61	61		92	96
1165.08	95	91		66	62	59		94	95
1166.09	92	93		66	62	58		94	96
1167.12	93	92		65	61	59		93	94
1168.12	93	92		65	61	59		93	97
1169.12	94	93		66	61	60		91	97
1170.12	92	93		64	62	59		93	96
1171.12	94	92		65	62	59		95	96
1172.12	94	92		66	61	58		93	96
1173.12	94	91		65	61	59		93	96
1174.12	95	91		67	62	58		93	96
1175.13	94	92		65	61	61		93	95
1176.12	95	91		65	62	61		92	97
1177.11	94	92		65	62	58		94	97
1178.12	94	92		65	61	60		93	95
1179.12	93	92		65	61	58		94	97
1180.12	95	91		67	61	59		94	96
1181.13	92	93		67	61	58		92	95
1182.12	93	91		65	61	59		94	94
1183.12	94	92		65	61	59		92	98
1184.12	93	92		65	61	58		93	95
1185.12	93	90		65	61	60		94	95
1186.13	93	93		65	61	58		93	96
1187.13	94	92		65	61	59		94	94
1188.12	92	93		66	61	59		93	95
1189.12	93	92		65	61	59		93	97
1190.11	94	91		66	63	58		91	95
1191.14	94	92		66	61	60		93	98
1192.09	94	92		66	61	59		95	96
1193.13	94	93		66	61	58		94	97
1194.12	93	92		66	61	60		94	97
1195.12	92	92		67	60	59		94	96
1196.12	92	91		65	61	58		94	96
1197.12	95	92		65	61	60		93	97
1198.12	94	92		65	61	58		92	95
1199.12	95	91		64	62	59		93	95
1200.12	93	92		65	61	59		94	95
1201.11	94	92		64	61	58		94	95
1202.11	94	93		67	62	59		93	93
1203.09	95	92		66	60	60		91	94
1204.13	94	91		66	60	60		94	96
1205.13	95	94		64	61	58		92	96
1206.13	93	91		65	61	59		95	97
1207.13	93	92		66	61	59		94	97
1208.09	93	91		65	61	60		93	96
1209.13	95	92		64	61	59		92	95
1210.09	94	92		66	61	60		94	96
1211.11	94	91		66	61	59		92	95
1212.13	92	90		66	60	60		92	95
1213.1	92	92		65	61	59		94	94
1214.11	93	92		65	62	59		94	95
1215.09	93	91		64	61	59		93	96
1216.13	94	92		65	62	59		93	96
1217.12	94	91		65	61	58		93	94
1218.12	93	91		67	61	59		92	96
1219.11	92	91		65	61	59		93	94
1220.11	92	92		65	61	58		92	95
1221.11	93	93		66	61	59		94	96
1222.11	93	89		66	60	58		93	96
1223.11	94	89		65	61	59		94	96
1224.11	93	94		66	63	59		92	96
1225.12	94	90		64	61	60		92	97
1226.12	94	90		66	62	60		92	96
1227.12	94	92		65	61	58		93	96
1228.13	94	90		64	60	57		93	95
1229.13	93	92		65	60	58		92	98
1230.12	92	93		64	61	59		94	95
1231.12	94	93		65	60	58		94	95
1232.12	92	92		66	60	58		94	96
1233.12	94	91		64	61	60		92	96
1234.11	94	91		64	61	59		92	96
1235.11	95	93		65	61	57		93	95
1236.13	93	91		64	60	59		93	95
1237.12	94	93		64	60	60		94	95
1238.12	95	92		64	61	60		93	97
1239.13	92	91		65	60	59		94	96
1240.1	96	90		66	61	59		93	96
1241.11	93	92		66	61	58		93	94
1242.11	95	91		64	60	60		93	95
1243.1	94	94		66	60	59		93	94
1244.14	92	93		65	61	58		94	96
1245.14	91	93		65	60	59		94	96
1246.12	95	92		65	60	59		92	95
1247.12	92	91		65	61	61		94	97
1248.11	95	91		65	60	59		94	97
1249.14	95	93		64	61	59		92	95
1250.13	94	92		65	62	59		92	95
1251.13	94	93		65	60	58		93	97
1252.12	94	92		64	61	58		93	95
1253.11	95	89		64	61	58		94	95
1254.11	95	92		64	61	58		93	96
1255.12	94	93		65	60	60		95	95
1256.11	94	90		62	61	60		94	93
1257.11	93	91		64	61	58		94	94
1258.12	94	91		65	61	59		93	95
1259.11	91	92		63	60	59		93	96
1260.11	95	90		65	61	60		93	97
1261.09	92	92		64	61	60		94	95
1262.09	93	92		65	60	58		94	96
1263.14	94	90		64	60	58		94	96
1264.09	93	93		64	60	60		93	95
1265.09	93	94		65	61	59		93	95
1266.14	93	93		66	61	58		94	96
1267.11	96	93		65	61	58		91	96
1268.09	95	91		65	61	60		94	96
1269.11	93	91		64	61	58		93	96
1270.13	93	91		64	61	60		93	96
1271.13	94	90		66	60	60		95	96
1272.13	95	93		64	61	59		94	95
1273.14	93	91		65	60	58		94	97
1274.14	95	91		64	61	59		93	95
1275.11	92	90		64	60	60		94	95
1276.14	94	93		64	60	61		94	96
1277.09	93	91		64	61	59		95	96
1280.21	93	91		64	60	59		93	96
1281.22	92	92		62	60	59		92	95
1282.27	95	91		64	61	59		93	95
1283.28	95	89		65	60	59		93	96
1284.31	93	92		64	60	59		92	95
1285.34	93	91		65	60	60		93	97
1286.38	93	92		64	60	59		93	96
1287.38	94	91		65	60	59		96	96
1288.39	93	92		62	60	57		93	96
1289.43	93	91		63	61	59		91	95
1290.46	94	92		62	62	59		92	95
1291.47	94	91		65	60	59		92	96
1292.51	94	90		65	61	61		92	98
1293.5	95	92		64	60	59		93	95
1294.5	93	91		64	60	56		92	95
1295.53	92	91		64	60	59		91	95
1296.48	93	92		65	60	59		93	95
1297.49	95	91		64	59	58		93	94
1298.51	94	90		64	60	58		94	95
1299.51	94	91		63	60	59		91	96
1300.52	93	92		62	61	58		93	94
1301.51	92	91		63	60	60		94	97
1302.51	93	91		65	60	60		93	95
1303.53	92	90		63	61	58		93	95
1304.52	93	90		63	61	59		92	95
1305.52	93	93		64	61	59		93	95
1306.52	91	92		62	60	58		92	96
1307.52	94	91		64	61	58		92	96
1308.51	94	90		63	60	59		92	97
1309.51	93	92		64	60	57		93	97
1310.51	94	90		63	59	58		93	96
1311.49	94	92		63	60	60		92	96
1312.53	94	90		63	61	60		93	95
1313.52	95	91		63	61	59		91	97
1314.52	93	91		63	60	58		94	95
1315.52	91	91		63	60	58		94	95
1316.52	92	92		65	60	58		92	96
1317.52	93	90		63	59	59		93	95
1318.53	93	92		65	59	59		94	94
1319.52	93	92		63	59	58		92	94
1320.51	94	91		64	60	59		93	95
1321.5	94	91		63	61	58		93	97
1322.52	94	92		62	61	59		92	96
1323.52	95	91		62	61	58		92	94
1324.52	92	91		64	60	58		92	95
1325.52	93	89		63	60	60		92	95
1326.52	94	90		63	60	59		93	96
1327.52	94	93		63	60	58		93	96
1328.52	93	90		63	61	56		94	94
1329.52	92	92		63	59	59		92	94
1330.51	93	90		64	60	59		91	96
1331.52	94	92		64	60	58		94	97
1332.52	95	91		63	60	58		92	96
1333.52	94	92		63	60	59		93	95
1334.52	94	91		63	59	59		92	95
1335.52	94	92		65	61	57		93	96
1336.51	94	90		63	59	59		94	95
1337.51	94	92		61	60	60		92	98
1338.52	93	91		64	59	58		92	94
1339.52	94	91		64	61	57		91	94
1340.52	94	90		63	60	60		92	93
1341.52	94	91		63	60	59		92	96
1342.52	94	91		64	61	58		92	95
1343.53	93	92		64	60	58		93	95
1344.49	92	93		65	60	57		92	97
1345.52	92	92		63	60	58		93	96
1346.52	92	91		63	61	57		92	96
1347.52	92	91		64	60	60		93	95
1348.52	93	93		62	60	58		92	94
1349.52	94	92		64	59	57		91	94
1350.53	93	91		64	60	60		92	95
1351.52	94	91		63	59	58		93	95
1352.53	93	91		63	61	58		91	95
1353.48	93	91		64	59	59		93	97
1354.54	92	91		63	61	59		92	95
1355.53	94	92		63	61	59		93	96
1356.52	93	89		63	61	58		91	94
1357.52	94	90		63	60	58		92	97
1358.52	92	92		62	60	59		93	94
1359.53	93	91		63	60	58		92	97
1360.52	94	91		62	61	58		92	95
1361.52	95	91		65	60	58		92	93
1362.52	96	90		62	60	57		94	97
1363.53	94	92		63	60	58		93	96
1364.53	92	90		63	59	57		92	96
1365.54	92	91		63	59	58		91	95
1366.52	95	90		64	60	59		91	96
1367.52	94	90		63	60	58		91	96
1368.5	94	91		63	60	60		91	96
1369.49	93	91		62	60	58		93	95
1370.53	93	92		64	60	56		93	95
1371.49	93	91		62	59	59		91	96
1372.5	93	90		62	61	58		93	96
1373.51	94	90		63	59	57		92	94
1374.54	93	91		62	61	58		91	96
1375.5	92	91		63	61	58		92	96
1376.53	93	91		64	60	58		91	96
1377.52	94	90		61	59	59		92	97
1378.52	93	91		62	60	59		92	95
1379.51	94	92		62	60	60		92	96
1380.51	94	91		61	60	58		91	95
1381.49	92	92		63	59	57		94	96
1382.52	93	92		63	60	58		92	97
1383.52	94	92		63	59	59		93	96
1384.51	93	91		63	60	58		93	96
1385.49	95	92		64	60	57		92	96
1386.54	93	91		64	61	58		92	96
1387.54	94	90		62	59	59		91	96
1388.54	92	89		63	60	59		94	96
1389.54	95	92		62	60	58		94	95
1390.49	94	91		63	60	58		93	96
1391.54	92	91		62	60	59		92	94
1392.54	95	89		63	60	57		93	95
1393.51	93	92		62	60	58		93	95
1394.51	94	90		63	59	59		93	95
1395.51	92	91		63	59	58		94	97
1396.49	94	91		64	60	58		93	95
1397.53	93	91		63	60	57		92	95
1398.52	93	90		64	59	59		92	95
1399.52	94	90		63	59	59		93	95
1400.53	94	92		62	60	58		92	94
1401.53	93	91		64	59	58		90	96
1402.53	94	92		62	60	58		91	97
1403.54	92	91		63	61	57		94	95
1404.51	95	93		62	59	58		93	96
1405.53	93	90		63	60	59		92	95
1406.53	93	89		63	59	58		92	94
1407.53	93	92		64	60	59		93	93
1408.53	92	92		63	59	57		92	93
1409.53	92	91		62	60	58		93	95
1410.53	93	90		63	59	58		92	95
1411.54	93	91		63	58	59		92	96
1412.49	94	92		64	59	57		92	96
1413.54	93	92		61	59	57		93	95
1414.53	92	91		62	60	59		93	95
1415.53	94	90		64	59	59		93	95
1416.53	94	91		61	60	58		92	94
1417.53	94	91		63	60	59		93	96
1418.54	92	93		62	60	57		93	95
1419.54	92	92		63	59	59		93	95
1420.51	94	91		62	60	58		93	95
1421.5	92	92		63	60	56		93	96
1422.54	93	91		62	61	57		92	96
1423.52	91	91		62	59	58		92	95
1424.53	94	92		62	60	59		91	95
1425.52	92	91		62	59	60		94	95
1426.52	93	92		62	59	57		93	95
1427.54	93	93		61	59	57		91	95
1428.52	93	91		62	59	59		91	95
1429.54	93	90		62	59	60		91	96
1430.49	92	92		63	59	58		94	95
1431.52	92	92		62	60	58		93	95
1432.54	92	90		62	60	60		92	95
1433.53	94	90		62	59	58		92	94
1434.54	92	90		62	60	56		94	94
1435.54	92	91		61	59	58		94	96
1436.53	94	91		62	59	58		91	96
1437.52	95	92		63	60	57		92	94
1438.52	93	90		62	59	59		92	94
1439.53	91	91		62	59	59		94	96
1440.53	94	91		62	59	60		92	96
1441.52	93	90		62	60	59		92	96
1442.52	93	89		62	60	57		92	95
1443.52	93	91		63	59	56		91	94
1444.53	93	92		62	59	57		93	96
1445.53	92	91		62	59	59		92	94
1446.53	92	92		62	59	57		92	97
1447.53	93	91		61	60	58		93	95
1448.53	93	91		63	59	58		89	95
1449.53	93	91		62	60	57		94	96
1450.54	94	90		62	60	60		90	94
1451.54	93	91		63	60	58		92	95
1452.53	92	91		62	58	57		92	95
1453.53	93	91		63	59	58		91	97
1454.52	94	92		63	60	60		93	95
1455.52	95	92		63	60	57		94	96
1456.52	92	90		62	60	58		91	93
1457.5	92	90		63	59	57		92	95
1458.53	93	91		62	60	59		92	94
1459.53	95	90		62	59	57		91	96
1462.76	93	92		61	60	57		93	95
1463.79	95	92		62	60	59		92	95
1464.8	94	91		63	59	58		94	96
1465.84	94	92		61	60	59		93	94
1466.88	91	93		62	59	57		92	94
1467.9	92	91		60	58	57		91	95
1468.89	94	91		63	59	58		93	94
1469.94	92	92		62	59	58		92	96
1470.97	94	92		63	59	56		94	94
1472	93	89		61	60	58		94	95
1473.01	93	92		62	58	58		91	95
1474.05	92	90		63	59	58		91	96
1475.07	92	91		63	58	57		92	95
1476.07	93	91		62	58	57		92	98
1477.04	91	92		61	59	58		92	94
1478.07	92	91		63	58	56		93	96
1479.07	94	91		61	59	59		93	95
1480.07	93	92		63	58	58		93	94
1481.06	93	91		62	59	58		92	96
1482.06	93	91		61	59	56		93	95
1483.07	92	91		62	59	58		94	97
1484.07	95	92		63	58	58		92	95
1485.07	94	91		61	59	57		93	94
1486.07	93	91		64	59	58		92	93
1487.07	94	91		61	60	58		92	96
1488.07	93	91		63	58	56		92	95
1489.04	95	91		61	59	57		92	96
1490.06	92	91		61	59	57		94	95
1491.06	93	90		61	58	58		92	96
1492.09	93	92		62	59	55		93	94
1493.05	93	91		62	59	58		92	94
1494.08	93	91		62	58	58		94	94
1495.03	95	91		61	58	58		93	95
1496.08	93	91		62	58	56		92	96
1497.03	92	91		63	59	56		91	94
1498.06	94	92		62	60	57		91	96
1499.04	92	93		62	59	57		93	96
1500.08	92	90		62	58	56		92	95
1501.06	93	91		63	59	58		94	96
1502.06	92	90		61	60	57		92	96
1503.04	92	90		62	58	58		93	95
1504.05	93	91		62	60	55		93	95
1505.06	94	92		61	58	59		93	96
1506.04	91	92		62	60	57		90	95
1507.07	93	90		62	58	56		93	94
1508.07	95	91		62	60	56		92	95
1509.08	92	90		62	59	57		90	96
1510.08	93	92		63	58	58		92	96
1511.05	93	90		64	60	56		93	95
1512.08	92	90		61	59	58		93	96
1513.06	93	90		60	59	55		92	94
1514.07	92	91		62	59	57		94	95
1515.04	92	91		62	59	57		92	94
1516.1	94	92		63	59	58		92	94
1517.07	93	92		62	57	58		91	95
1518.06	92	94		62	58	57		92	96
1519.05	93	91		62	59	57		92	95
1520.06	92	90		63	59	58		92	96
1521.05	94	90		62	59	59		94	96
1522.04	92	91		61	59	57		91	95
1523.08	92	91		61	59	56		91	94
1524.08	95	92		64	58	57		93	93
1525.07	93	92		62	59	58		93	95
1526.07	95	91		62	58	55		92	95
1527.08	93	91		62	58	57		92	96
1528.08	92	91		62	59	57		92	96
1529.04	94	92		61	59	59		92	95
1530.04	92	90		61	58	58		90	96
1531.04	93	91		63	58	57		91	95
1532.08	94	92		63	59	57		92	94
1533.07	93	91		61	59	58		90	95
1534.07	93	91		62	58	56		92	94
1535.07	94	92		61	59	57		92	96
1536.07	93	91		60	59	56		91	96
1537.06	92	91		60	59	59		92	94
1538.04	95	90		61	59	57		94	94
1539.08	93	92		62	59	58		92	96
1540.07	93	90		63	58	56		94	97
1541.07	92	92		61	59	56		92	95
1542.08	92	91		63	58	58		92	95
1543.08	93	92		61	58	58		92	96
1544.04	93	90		61	58	56		91	96
1545.06	94	92		61	58	56		92	96
1546.07	92	91		61	58	56		94	96
1547.08	93	90		63	59	58		92	95
1548.08	93	92		60	59	57		92	96
1549.09	93	90		61	59	56		93	96
1550.08	92	90		60	59	57		91	96
1551.07	93	91		61	59	59		93	95
1552.08	92	89		61	58	56		93	97
1553.09	93	89		63	59	58		92	96
1554.04	94	91		60	59	58		92	96
1555.09	93	90		61	58	57		93	95
1556.04	92	91		62	58	58		91	96
1557.06	93	91		60	59	57		93	95
1558.06	93	91		61	58	58		92	95
1559.07	95	92		60	58	58		92	94
1560.07	94	92		60	59	57		92	96
1561.07	93	91		61	59	58		92	93
1562.06	93	92		63	58	57		91	97
1563.04	94	91		62	59	56		93	95
1564.04	94	91		62	57	59		93	95
1565.04	94	92		62	58	56		91	94
1566.08	92	91		60	58	56		92	96
1567.08	91	91		63	58	57		91	95
1568.08	92	90		62	58	57		92	95
1569.09	91	91		60	60	56		92	96
1570.04	93	91		61	59	57		92	96
1571.09	91	92		62	59	56		92	95
1572.04	92	92		61	59	57		92	98
1573.07	95	91		62	59	58		91	94
1574.08	94	92		61	58	57		91	94
1575.08	92	92		60	59	57		93	95
1576.09	93	92		60	58	56		92	97
1577.08	92	91		60	58	58		93	97
1578.09	91	91		61	60	57		91	95
1579.07	94	91		62	59	57		92	96
1580.07	92	92		61	58	57		93	96
1581.07	93	91		62	58	56		93	95
1582.08	93	91		61	59	57		91	96
1583.08	92	90		59	58	57		94	96
1584.08	92	92		62	59	58		92	95
1585.08	93	91		60	58	56		92	96
1586.08	92	90		61	59	56		92	95
1587.09	94	90		62	59	58		93	95
1588.09	92	90		62	58	58		92	95
1589.09	93	91		61	59	57		92	97
1590.08	94	90		60	59	57		94	96
1591.08	92	92		62	57	58		92	93
1592.09	92	91		61	59	56		92	95
1593.05	92	90		61	58	55		94	96
1594.04	93	91		61	59	56		93	95
1595.09	94	91		62	58	56		92	96
1596.08	93	90		63	58	56		94	95
1597.07	95	92		61	58	56		92	96
1598.09	92	90		61	58	58		91	95
1599.04	93	90		61	59	56		91	94
1600.07	92	93		61	58	57		92	95
1601.07	92	90		61	58	56		92	93
1602.07	93	92		61	59	56		91	95
1603.07	93	91		59	58	58		91	95
1604.08	92	91		63	58	58		94	94
1605.06	92	90		61	58	56		93	96
1606.08	91	92		62	59	56		93	95
1607.04	93	92		62	59	57		92	94
1608.05	93	91		61	58	58		91	95
1609.08	93	92		61	58	58		92	95
1610.09	92	91		62	58	58		93	95
1611.09	92	91		61	58	57		92	97
1612.07	92	89		60	59	56		93	96
1613.05	91	90		61	58	56		92	96
1614.09	93	91		61	58	56		92	95
1615.05	92	90		60	59	57		92	96
1616.07	92	92		59	58	56		91	95
1617.05	92	91		61	58	56		91	95
1618.1	93	89		61	59	58		93	95
1619.05	92	91		61	59	57		92	94
1620.08	93	93		61	57	56		92	96
1621.07	92	89		61	59	56		92	95
1622.07	92	90		60	58	56		92	94
1623.05	94	91		61	58	55		92	94
1624.08	93	91		60	58	56		94	95
1625.07	93	93		62	58	56		93	96
1626.07	94	92		60	58	57		91	96
1627.06	92	91		61	58	56		91	95
1628.05	91	89		60	58	58		91	96
1629.08	92	92		61	58	57		92	97
1630.08	94	92		60	58	54		91	96
1631.05	94	91		61	58	57		91	95
1632.09	93	91		61	59	56		93	95
1633.06	94	91		59	58	58		91	97
1634.1	91	91		61	58	56		91	96
1635.05	94	89		60	58	56		93	94
1636.07	93	91		62	59	55		93	96
1637.07	92	91		61	58	56		92	95
1638.07	91	90		60	59	56		93	95
1639.05	92	92		59	59	56		93	95
1640.06	92	91		62	58	57		92	93
1641.09	92	91		61	57	56		92	94
1642.08	92	91		61	58	57		93	96
1645.11	93	91		62	58	56		92	95
1646.14	91	91		60	58	58		91	95
1647.15	93	92		58	59	56		94	94
1648.19	92	90		58	57	56		91	95
1649.22	94	90		58	58	56		92	94
1650.24	92	89		60	58	55		93	95
1651.25	93	89		61	59	57		91	95
1652.27	94	92		59	58	58		91	93
1653.31	94	90		59	58	58		91	95
1654.34	94	90		60	58	57		92	95
1655.34	91	92		60	58	57		91	96
1656.39	93	90		61	58	59		94	97
1657.42	93	91		60	58	57		92	94
1658.4	92	90		61	58	58		93	96
1659.41	94	91		60	58	55		91	94
1660.4	92	91		59	57	58		92	93
1661.38	92	93		60	58	58		92	94
1662.43	92	91		59	58	57		93	96
1663.42	93	89		60	58	59		92	94
1664.4	92	91		61	59	57		92	95
1665.42	93	90		60	58	57		90	95
1666.42	93	92		59	59	58		91	94
1667.43	93	90		61	58	56		93	95
1668.42	92	89		60	58	56		92	96
1669.42	92	89		59	58	58		90	94
1670.43	93	90		59	58	58		92	94
1671.43	91	90		60	58	58		92	94
1672.44	94	90		58	58	57		93	95
1673.41	94	90		61	58	58		91	95
1674.44	94	90		59	58	56		91	97
1675.43	93	90		59	59	57		93	96
1676.39	92	91		60	58	57		92	94
1677.38	93	91		60	59	57		90	94
1678.43	93	91		60	58	57		90	96
1679.38	93	91		59	58	58		93	95
1680.42	93	91		60	59	57		93	95
1681.4	94	90		61	59	56		92	95
1682.43	92	90		59	58	56		91	95
1683.44	94	92		60	59	57		91	94
1684.42	92	90		59	57	57		91	94
1685.42	93	91		60	58	57		91	94
1686.41	93	91		59	57	58		92	95
1687.41	94	90		59	58	57		92	94
1688.41	93	91		60	58	57		91	96
1689.41	92	91		61	59	56		91	96
1690.41	92	89		60	58	55		90	94
1691.43	93	90		60	58	56		92	96
1692.43	92	91		60	58	57		93	95
1693.42	93	92		58	57	56		90	95
1694.43	92	90		59	58	57		92	94
1695.41	93	90		59	57	57		93	95
1696.4	92	91		60	57	57		92	94
1697.43	90	91		59	58	58		91	93
1698.43	93	90		59	58	57		94	94
1699.43	92	90		60	58	57		92	95
1700.42	93	90		60	58	57		92	93
1701.42	91	91		61	58	57		92	94
1702.42	93	92		59	58	55		92	93
1703.41	92	90		60	58	57		93	94
1704.43	93	91		60	59	57		92	96
1705.42	94	90		60	58	58		92	94
1706.41	94	89		59	58	55		92	94
1707.4	91	90		59	58	58		91	95
1708.44	94	91		60	58	58		92	95
1709.4	94	91		59	58	56		92	95
1710.43	91	91		58	59	58		92	96
1711.43	93	90		59	58	57		94	95
1712.43	94	91		59	57	57		92	94
1713.43	91	89		59	59	57		92	95
1714.43	90	90		59	58	58		91	95
1715.43	94	90		60	58	55		91	94
1716.42	93	91		60	58	57		93	93
1717.43	93	92		60	58	56		92	94
1718.43	93	88		60	58	58		92	95
1719.44	92	90		60	58	58		93	94
1720.39	94	90		58	57	57		93	96
1721.44	93	91		58	59	56		91	94
1722.44	92	91		59	58	57		91	94
1723.42	94	90		57	58	57		92	94
1724.42	92	91		60	57	57		91	94
1725.42	92	91		60	59	56		90	95
1726.42	91	91		59	58	57		90	97
1727.42	94	89		59	59	58		93	96
1728.42	93	90		59	58	58		92	94
1729.43	92	90		58	57	57		92	94
1730.42	91	91		59	59	57		91	95
1731.42	92	91		59	59	55		91	94
1732.43	93	92		58	58	57		91	97
1733.44	92	90		59	58	55		92	95
1734.44	92	91		59	57	56		91	95
1735.44	92	90		60	58	56		91	94
1736.43	94	91		59	57	56		93	95
1737.44	92	90		60	59	57		91	96
1738.43	94	88		59	58	57		93	95
1739.43	92	89		61	57	58		92	94
1740.43	93	90		59	58	58		91	95
1741.43	92	89		60	58	58		92	93
1742.44	92	90		60	58	56		93	95
1743.43	92	90		59	58	59		93	95
1744.42	92	90		58	57	57		91	94
1745.42	92	90		59	58	58		91	93
1746.42	91	92		58	58	58		90	94
1747.42	92	90		59	58	58		90	95
1748.43	91	90		59	58	57		93	94
1749.43	92	90		60	57	57		92	96
1750.42	93	93		60	59	57		91	94
1751.43	94	89		60	58	59		93	94
1752.42	92	91		59	57	56		93	93
1753.43	93	92		58	58	54		91	95
1754.43	92	89		59	57	56		91	95
1755.43	92	92		59	58	55		91	96
1756.43	92	89		59	58	55		91	96
1757.43	92	91		59	58	57		92	94
1758.42	93	90		60	58	57		93	94
1759.42	91	91		59	57	56		91	95
1760.41	92	91		58	58	57		91	95
1761.42	93	92		59	57	57		91	93
1762.43	92	92		59	58	57		91	95
1763.43	94	93		59	57	57		91	95
1764.44	93	90		60	58	56		91	94
1765.42	92	90		58	58	56		92	94
1766.44	92	90		60	58	56		93	95
1767.41	92	90		59	58	57		92	94
1768.41	92	90		59	58	57		92	95
1769.43	92	89		60	58	57		92	95
1770.43	91	91		58	58	57		92	95
1771.43	93	91		58	58	57		91	95
1772.43	92	90		59	58	56		92	96
1773.43	92	90		59	58	59		92	94
1774.44	92	91		59	58	57		92	95
1775.43	94	90		60	58	56		92	93
1776.43	92	90		57	58	57		92	94
1777.43	92	90		59	58	55		92	97
1778.42	93	91		58	56	58		92	96
1779.43	91	90		58	57	58		91	94
1780.44	93	90		59	57	57		91	95
1781.42	91	91		58	58	57		91	96
1782.41	94	91		59	57	58		90	95
1783.45	91	90		59	58	57		91	94
1784.43	93	91		59	58	56		90	96
1785.44	91	91		59	57	57		92	94
1786.44	92	90		59	57	57		91	95
1787.4	92	91		58	58	57		90	95
1788.44	92	90		59	57	56		90	96
1789.4	91	90		57	57	56		93	95
1790.39	93	91		58	57	56		92	95
1791.44	92	91		58	57	56		92	95
1792.45	92	91		58	56	57		91	95
1793.41	92	90		59	57	56		91	95
1794.42	93	90		58	58	57		91	93
1795.42	92	91		58	58	57		92	96
1796.42	93	89		59	58	57		91	94
1797.42	93	92		59	58	53		91	94
1798.44	92	91		59	57	55		91	92
1799.42	93	91		58	58	56		90	96
1800.42	92	90		58	58	57		93	95
1801.41	90	90		59	57	57		92	94
1802.4	92	91		58	58	58		91	95
1803.44	92	91		58	58	58		92	94
1804.42	90	91		59	58	56		93	96
1805.41	92	91		60	58	57		92	94
1806.42	93	90		58	58	57		92	92
1807.41	92	90		58	58	57		92	96
1808.41	94	91		57	58	57		92	96
1809.41	92	91		59	58	58		92	94
1810.41	92	92		58	57	58		92	96
1811.43	92	91		59	58	57		94	95
1812.42	92	90		59	58	58		91	95
1813.43	92	90		57	58	57		91	95
1814.43	92	90		58	57	57		90	95
1815.42	94	90		60	57	56		92	95
1816.44	92	89		58	58	58		93	96
1817.44	92	91		59	58	57		91	95
1818.43	90	89		60	57	57		91	93
1819.42	93	90		58	58	56		92	94
1820.42	92	92		59	57	55		92	94
1821.42	92	91		58	57	56		91	96
1822.42	93	89		59	58	58		91	97
1823.42	92	91		59	57	57		91	94
1824.41	91	91		59	58	56		93	96
1827.58	92	91		58	58	55		92	96
1828.62	92	89		58	58	55		91	96
1829.64	92	92		59	57	55		91	95
1830.66	93	90		59	58	58		92	94
1831.69	92	90		58	58	56		92	94
1832.69	93	93		59	58	56		91	94
1833.75	92	90		56	57	57		92	96
1834.76	92	89		58	58	56		92	96
1835.78	92	91		59	57	56		91	94
1836.79	93	90		59	56	57		92	94
1837.81	93	90		58	56	55		90	95
1838.85	92	90		58	58	56		91	95
1839.85	92	90		58	56	56		93	94
1840.89	91	90		58	57	56		91	94
1841.89	92	90		58	58	55		92	95
1842.89	91	91		58	58	56		94	95
1843.88	92	90		57	57	56		91	95
1844.86	91	90		58	57	57		93	94
1845.9	90	91		58	58	55		92	96
1846.9	93	90		58	57	57		92	94
1847.88	91	90		58	58	57		91	94
1848.86	93	91		58	57	57		92	96
1849.9	93	90		57	57	57		92	94
1850.87	90	90		59	57	56		90	95
1851.88	91	91		59	57	57		90	94
1852.91	91	89		59	57	55		92	95
1853.85	92	91		59	58	55		92	96
1854.9	90	90		57	58	55		91	95
1855.89	92	89		57	58	57		91	94
1856.89	91	89		57	57	56		93	95
1857.88	93	90		58	58	56		90	96
1858.89	91	90		58	57	55		92	94
1859.89	92	90		59	57	56		92	95
1860.89	91	90		59	57	57		89	95
1861.9	95	90		57	58	56		91	96
1862.9	92	90		58	59	55		90	94
1863.9	93	91		58	58	57		91	95
1864.88	93	91		57	57	56		92	95
1865.88	93	92		58	58	54		90	96
1866.88	92	90		59	57	56		91	94
1867.91	92	91		58	57	57		90	94
1868.86	93	91		60	58	55		91	95
1869.88	93	92		57	58	56		91	95
1870.88	91	91		57	58	56		92	96
1871.88	92	90		58	59	57		92	95
1872.88	92	91		58	57	55		92	96
1873.89	92	91		57	56	56		90	94
1874.9	92	90		57	57	54		92	94
1875.9	91	92		58	57	55		92	95
1876.9	92	89		58	57	56		92	93
1877.9	91	90		57	58	56		92	94
1878.9	92	89		57	57	56		92	94
1879.9	93	89		58	57	56		92	96
1880.85	91	90		58	60	57		89	94
1881.9	90	90		58	57	56		92	94
1882.9	90	89		58	56	56		93	94
1883.89	92	89		59	57	56		92	95
1884.9	91	91		59	56	55		92	94
1885.86	92	90		59	58	56		90	95
1886.87	92	90		60	57	55		92	94
1887.91	91	90		59	57	55		93	95
1888.89	91	90		58	57	57		92	94
1889.9	92	91		58	58	56		91	95
1890.89	91	91		57	57	55		90	95
1891.91	93	90		58	58	55		91	96
1892.91	93	90		58	57	56		92	94
1893.88	92	91		57	56	57		91	95
1894.9	91	90		57	57	56		90	94
1895.89	93	91		58	57	58		92	95
1896.88	91	89		58	57	58		91	95
1897.86	91	92		58	57	56		93	95
1898.86	91	91		58	58	56		90	96
1899.89	91	91		57	58	55		90	94
1900.9	93	90		58	58	56		91	95
1901.9	91	90		57	57	56		92	96
1902.9	93	91		59	58	54		90	95
1903.9	94	90		57	57	56		93	95
1904.9	91	90		57	57	57		90	95
1905.89	90	89		58	57	54		91	94
1906.9	92	91		59	56	56		92	93
1907.9	93	90		57	57	57		91	94
1908.91	92	91		58	57	54		92	93
1909.91	93	91		57	57	57		92	94
1910.89	92	92		58	57	55		91	93
1911.89	92	90		58	58	56		91	94
1912.86	92	91		58	57	56		92	96
1913.87	91	91		58	57	56		92	94
1914.91	91	90		58	58	56		92	95
1915.92	91	90		57	58	55		92	94
1916.87	93	91		58	57	57		92	96
1917.91	92	90		58	57	57		93	95
1918.86	92	91		58	57	56		92	94
1919.89	91	90		57	57	55		90	93
1920.89	92	90		58	57	56		92	93
1921.9	92	90		58	57	56		90	94
1922.9	93	90		57	57	55		93	94
1923.86	93	90		58	57	54		90	96
1924.9	91	92		57	57	54		89	94
1925.9	92	88		58	57	56		91	94
1926.91	92	90		57	58	56		91	94
1927.9	92	90		58	57	55		92	94
1928.86	91	90		58	56	56		93	96
1929.89	91	91		58	57	56		92	94
1930.89	92	92		57	57	56		92	95
1931.89	90	90		57	56	56		91	95
1932.89	92	91		58	57	55		91	94
1933.9	92	91		58	56	54		92	95
1934.9	91	90		57	58	56		91	95
1935.9	92	90		57	57	55		91	94
1936.9	93	90		58	57	56		91	96
1937.9	90	91		58	57	56		92	96
1938.9	90	90		57	56	57		92	94
1939.87	93	90		58	58	56		91	95
1940.91	93	90		58	58	56		92	94
1941.86	90	90		57	58	56		92	94
1942.89	92	91		59	57	56		91	95
1943.87	91	91		58	58	56		90	97
1944.89	92	89		58	57	54		90	94
1945.91	92	91		58	57	58		92	94
1946.91	90	90		57	58	55		93	95
1947.88	90	91		58	57	56		92	95
1948.88	91	90		58	57	54		91	94
1949.89	92	89		58	57	55		93	94
1950.89	91	91		58	57	55		93	94
1951.88	94	89		57	57	56		92	95
1952.86	92	90		58	57	57		92	95
1953.87	89	90		58	57	55		92	95
1954.87	92	89		58	57	55		93	94
1955.91	93	91		56	57	55		91	95
1956.91	92	90		57	57	55		91	95
1957.86	93	89		57	58	55		91	94
1958.91	93	91		58	57	54		91	94
1959.9	89	90		57	56	55		92	95
1960.91	91	91		57	56	53		90	94
1961.91	92	90		56	56	56		91	94
1962.87	92	91		56	57	56		90	96
1963.91	92	90		57	57	55		92	94
1964.9	92	92		56	57	55		92	96
1965.9	92	90		58	56	56		91	93
1966.91	92	89		58	57	56		90	94
1967.91	93	90		57	57	56		91	94
1968.9	92	88		58	57	54		91	96
1969.9	91	90		57	57	56		91	95
1970.9	92	89		57	57	56		90	94
1971.9	90	89		58	57	53		91	94
1972.9	93	90		58	56	56		91	95
1973.9	91	90		58	57	53		92	93
1974.9	92	90		57	57	56		91	94
1975.89	91	91		57	56	55		91	95
1976.9	93	90		57	58	55		92	94
1977.9	91	89		57	57	55		92	94
1978.9	92	90		57	57	55		90	95
1979.9	91	90		57	57	54		91	95
1980.9	93	91		58	58	56		92	95
1981.9	91	90		57	57	55		91	96
1982.9	92	88		56	56	55		91	93
1983.9	91	90		57	57	54		91	94
1984.9	91	89		57	57	57		93	95
1985.9	90	90		56	56	55		91	94
1986.87	94	90		57	58	55		91	95
1987.89	91	89		57	57	55		92	95
1988.89	93	91		57	56	54		93	95
1989.89	92	90		57	57	55		92	93
1990.88	92	91		58	57	54		91	94
1991.9	91	90		57	56	55		91	94
1992.91	91	90		57	57	55		91	95
1993.92	91	90		57	57	56		93	95
1994.89	90	91		57	56	54		92	94
1995.87	92	91		58	57	54		92	94
1996.91	92	91		56	56	56		92	95
1997.91	93	90		57	57	55		90	93
1998.87	91	90		58	56	55		91	94
1999.87	93	90		56	57	55		91	94

## Sheet: Figure 1-Panel C
	AB/AB-Cy5 77N0-Cy3			ZB/AB-Cy5 77N0Cy3			AB-Cy5/AB 77N0-Cy3			AB-Cy5/ZB 77N0Cy3			Control (no enzyme)			AB-apm/AB-Cy5 77N0-Cy3			AB-Cy5/AB-apm 77N0-Cy3			AB/AB-apm-Cy5 77N0-Cy3
	0.003306	0.003444	0.003173	0.004072	0.004221	0.003926	0.001368	0.001252	0.001487	0.001663	0.001529	0.001801	0.0008642	0.0009893	0.0007411	0.0008506	0.001098	0.0006099	0.0008025	0.0009641	0.000644	0.0007191	0.0008783	0.0005625

## Sheet: Figure 1-Panel D
	AB-Cy5/AB			AB-Cy5/ZB 0N0-Cy3			Control (no enzyme)
	0.0004631	0.0005697	0.0003572	0.001147	0.001274	0.001022	9.157e-08	8e-05	0
