# Supplementary material for: Dual engagement of the nucleosomal acidic patches is essential for deposition of histone H2A.Z by SWR1C
Source: eLife. 2024 May 29;13:RP94869. doi: 10.7554/eLife.94869 (PMC11139478; doi:10.7554/eLife.94869)
Supplement: Figure 2—figure supplement 1—source data 1. [file elife-94869-fig2-figsupp1-data1.xlsx]

## Sheet: Figure 2-Fig Sup 1-Panel A
Time (s)	AB/AB-Cy5 77N0-Cy3 atp			AB/AB-Cy5 0N0-Cy3 atp
0	2193	2199	2045	3696	3523	3005
3.626	2559	2476	2121	3945	3501	2998
6.819	2449	2386	2322	3889	3310	3022
9.999	2274	2180	2190	3754	3414	3177
13.186	2435	2336	2269	3766	3288	3137
16.35	2305	2239	2207	3666	3362	3066
19.523	2524	2398	2016	3762	3805	3447
22.716	2337	2384	2123	3654	3501	3157
25.882	2346	2454	2090	3716	3319	3162
29.066	2361	2382	2222	3613	3459	3136
32.257	2214	2462	2210	3868	3438	3427
35.444	2177	2183	2090	3962	3483	3270
38.619	2521	2369	2109	3737	3559	2993
41.789	2097	2447	2216	3646	3502	3327
44.958	2262	2463	2102	3651	3639	3220
48.124	2509	2182	1887	3813	3692	3264
51.303	2043	2190	1886	3973	3426	3327
54.486	2236	2164	2089	3755	3669	3180
57.669	2224	2271	2049	3909	3498	3091
60.84	2389	2313	2149	3665	3685	3253
64.055	2198	2256	2196	3882	3580	3515
67.239	2179	2142	2223	3649	3651	3254
70.405	2315	2203	2048	3672	3503	3288
73.577	2177	2234	2048	3890	3621	3476
76.781	2154	2046	1914	3462	3435	3224
79.946	2122	1984	2188	3775	3557	3390
83.134	2287	2293	2126	3637	3522	3180
86.317	2188	2113	2126	3875	3624	3295
89.492	2194	2165	2001	3820	3678	3067
92.675	2079	2014	1942	3665	3646	3261
95.874	2176	2133	2028	3768	3637	3193
99.077	2027	2184	1957	3781	3505	3144
102.254	2189	2194	1959	3531	3544	3244
105.441	2106	2108	2188	3670	3595	3242
108.612	2269	2202	2034	3783	3615	3251
111.809	2286	2057	1917	3726	3309	3055
114.983	2212	2223	1958	3670	3617	3590
118.165	2127	2057	1817	3864	3663	3083
121.351	2287	2070	2214	3745	3552	3280
124.537	2119	2213	1878	3769	3688	3313
127.706	2113	2126	1970	3679	3708	3227
130.867	2018	2103	1891	3580	3759	2924
134.044	2201	2179	1889	3951	3648	3183
137.208	2096	2070	1802	3807	3626	3244
140.387	2125	2051	2054	3589	3611	3360
143.571	2292	1960	1890	3727	3670	3258
146.77	2083	1988	2051	3498	3690	3284
149.964	1934	2073	1888	3992	3536	3254
153.132	2041	2092	1936	3589	3462	3205
156.322	2099	1967	1862	3630	3379	3353
159.521	2204	1983	1799	3637	3614	3019
162.689	2038	1997	1878	3803	3717	3242
165.876	1933	1858	1931	3571	3596	3334
169.044	1912	1989	1844	3627	3722	3285
172.231	2067	2050	1796	3597	3318	3391
175.413	2051	2153	1961	3487	3674	3236
178.58	2163	2062	2033	3742	3349	2965
181.749	1939	1935	2047	3478	3627	3326
184.93	1942	1977	1930	3722	3428	3140
188.092	1799	1836	1715	3523	3429	3198
191.303	1833	1941	1969	3880	3282	3056
194.466	1980	2096	1822	3715	3582	3229
197.624	1884	1901	1913	3675	3321	3292
200.788	1841	1767	1931	3585	3334	3132
203.97	1854	1934	1982	3497	3719	3116
207.133	1995	1811	1823	3785	3659	3198
210.298	2106	2019	1968	3495	3612	3136
213.472	1987	2046	1914	3389	3314	3195
216.651	2005	2096	1811	3574	3320	3318
219.839	1867	1949	1811	3674	3304	3123
223.005	2090	1869	1747	3597	3307	3159
226.167	2149	2066	1806	3272	3571	3376
229.357	1840	1920	1857	3415	3426	3291
232.566	1915	1603	1762	3651	3368	3207
235.729	2049	1806	1959	3538	3550	3043
238.902	1913	1916	1823	3631	3191	3165
242.071	2047	1965	1833	3357	3340	3084
245.264	1936	1969	1851	3621	3460	3045
248.445	1942	1941	1839	3623	3367	2893
251.631	1736	1762	1970	3387	3130	3183
254.817	2034	1962	1679	3748	3488	2872
258.024	2017	1837	1840	3437	3325	2936
261.212	1929	1982	1828	3710	3410	3178
264.41	2010	1912	1844	3347	3443	3293
267.584	1879	1909	1562	3491	3624	3123
270.75	1997	1714	1825	3756	3104	2850
273.931	1962	1941	1790	3485	3483	3046
277.099	1804	1723	1479	3470	3234	3166
280.273	1835	1992	1795	3563	3075	3133
283.453	1983	1967	1794	3438	3312	3371
286.637	1836	1924	1719	3491	3390	3201
289.834	1767	1958	1634	3744	3631	3127
293.014	1862	1933	1798	3407	3338	3201
296.209	1805	1758	1701	3439	3337	3169
299.374	1817	1795	1865	3679	3511	3072
302.563	1937	1742	1757	3462	3495	2870
305.735	1604	1748	1831	3491	3467	2988
308.924	1959	1877	1775	3331	3275	2971
312.117	1731	2150	1675	3465	3244	3082
315.305	1862	1716	1615	3619	3279	3027
318.475	1997	1723	1713	3442	3325	2980
321.67	1833	1875	1558	3185	3391	3088
324.834	1603	1748	1763	3417	3025	2995
328.01	1771	1746	1690	3442	3283	3169
331.181	1735	1837	1824	3502	3055	2951
334.349	1799	1920	1666	3617	3227	2914
337.505	1943	1756	1639	3297	3425	3058
340.713	1793	1785	1777	3349	3396	2893
343.871	1783	1916	1884	3558	3528	3020
347.054	1753	1633	1763	3382	3248	2709
350.251	1683	1777	1554	3620	3237	3175
353.441	1582	1960	1550	3356	3140	2939
356.612	1904	1874	1610	3314	3612	2988
359.805	1738	1840	1611	3509	3104	3050
362.966	1845	1804	1564	3286	3300	3103
366.152	1767	1953	1786	3392	3472	3093
369.321	1667	1803	1763	3639	3428	3133
372.499	1769	1795	1615	3480	3382	2869
375.685	1928	1819	1661	3488	3359	3060
378.856	1769	1773	1679	3590	3311	2990
382.075	1656	1641	1666	3351	3100	2792
385.259	1691	1862	1630	3435	3371	2670
388.461	1767	1959	1655	3308	3235	2916
391.672	1840	1706	1792	3543	3188	3016
394.844	1523	1886	1655	3410	3320	3039
398.013	1686	1730	1709	3431	2967	2849
401.197	1645	1783	1884	3322	3185	2883
404.387	1735	1752	1531	3277	3096	3132
407.549	1703	1705	1606	3463	3097	2723
410.718	1820	1690	1741	3429	3211	3026
413.899	1698	1690	1652	3369	3197	2957
417.09	1646	1804	1689	3163	3181	2829
420.279	1699	1672	1712	3354	3220	2958
423.451	1685	1799	1757	3392	3411	3068
426.656	1648	1662	1663	3416	3144	3065
429.856	1871	1711	1717	3413	2990	3157
433.044	1549	1759	1618	3335	3238	2997
436.221	1750	1703	1691	3219	3241	3132
439.389	1643	1711	1777	3347	2953	2770
442.594	1693	1773	1762	3184	3178	2727
445.795	1668	1750	1647	3164	3083	2995
448.964	1792	1674	1682	3387	3269	2958
452.148	1804	1670	1429	3379	3183	2666
455.339	1817	1766	1623	3516	3256	2944
458.517	1607	1739	1626	3128	3127	2998
461.702	1692	1802	1591	3359	2875	2700
464.889	1540	1635	1723	3350	3197	2662
468.051	1646	1720	1590	3298	3181	2867
471.239	1662	1723	1608	3441	3257	2897
474.396	1865	1813	1605	3335	3225	2836
477.613	1692	1599	1572	3387	2955	3013
480.791	1635	1897	1786	3245	3297	2728
483.992	1735	1804	1686	3295	2998	2819
487.184	1627	1691	1569	3478	3093	2795
490.377	1659	1594	1627	3179	3016	2696
493.561	1569	1523	1489	3420	3078	2991
496.768	1634	1523	1709	3318	2980	2863
499.973	1747	1716	1735	3347	3182	2766
503.164	1601	1888	1824	3388	3103	2782
506.351	1550	1707	1643	3126	3121	2862
509.543	1994	1765	1680	3330	3115	2960
512.738	1713	1812	1724	3291	2847	2942
515.925	1754	1706	1579	3377	3182	2875
519.118	1872	1678	1593	3110	3231	2770
522.3	1721	1502	1638	3303	3086	2773
525.481	1874	1523	1594	3243	3064	2842
528.647	1692	1757	1599	3087	3006	3138
531.819	1856	1580	1619	3098	3106	2910
534.992	1586	1668	1635	3263	3197	2778
538.165	1757	1708	1395	3378	3113	3116
541.338	1857	1523	1778	3243	2905	2902
544.542	1686	1631	1356	3118	3005	2890
547.728	1776	1579	1701	3191	3150	3038
550.917	1601	1614	1630	3301	2898	2931
554.101	1656	1640	1509	3360	3148	2982
557.279	1809	1720	1528	3049	2868	2930
560.448	1619	1793	1544	3244	3307	2954
563.614	1754	1663	1550	3224	3218	3032
566.795	1730	1648	1750	3354	3160	2716
569.999	1598	1859	1606	3075	2997	3083
573.194	1760	1596	1621	3274	3129	2868
576.368	1629	1624	1493	3274	3144	2760
579.538	1698	1567	1609	3229	3149	2913
582.726	1534	1640	1518	3129	3061	2839
585.917	1606	1505	1597	3093	3035	3190
589.082	1605	1634	1552	3088	2930	2823
592.268	1466	1573	1555	3167	2795	2662
595.432	1482	1649	1673	2997	2894	2933
598.607	1585	1682	1438	3196	3036	2909
601.803	1642	1494	1569	3014	2804	2918
604.981	1675	1505	1511	3256	2946	2868
608.157	1616	1482	1586	3474	2760	2829
611.361	1894	1720	1467	3418	2944	2632
614.527	1794	1579	1592	3102	2817	2939
617.707	1734	1564	1696	3421	3031	2933
620.875	1658	1666	1564	3279	2905	2966
624.043	1527	1799	1627	3400	3079	2723
627.236	1646	1585	1596	3256	2820	2761
630.407	1555	1633	1587	3323	3000	2815
633.619	1615	1544	1588	3124	2927	3054
636.789	1594	1642	1615	2968	2964	2896
639.982	1621	1644	1658	3500	3041	2838
643.17	1694	1513	1683	3016	2835	2752
646.362	1590	1698	1632	2996	2883	2868
649.545	1525	1683	1508	3165	2905	2738
652.712	1711	1626	1548	3101	2875	2786
655.889	1632	1593	1423	2947	2945	2885
659.073	1629	1704	1438	3033	3031	2885
662.278	1667	1441	1418	3395	3092	2814
665.446	1478	1550	1463	3031	2734	2843
668.618	1532	1698	1469	2993	3003	2665
671.812	1640	1544	1605	3086	2782	2795
675.013	1603	1555	1586	3098	3069	2757
678.184	1495	1570	1650	3012	3096	2803
681.355	1618	1693	1528	3083	2774	2646
684.534	1639	1600	1627	3087	3111	2640
687.709	1446	1535	1385	3115	2777	2530
690.883	1474	1750	1618	3225	2742	2806
694.055	1662	1456	1626	2967	3011	2889
697.237	1647	1542	1700	3131	2891	2897
700.41	1709	1541	1703	3232	2958	2653
703.577	1568	1487	1497	3312	2884	2873
706.732	1580	1622	1633	3166	2989	2721
709.907	1606	1638	1567	3307	2904	2832
713.078	1574	1454	1452	3381	3149	2762
716.26	1754	1527	1461	3402	2944	2866
719.451	1831	1646	1649	3008	3043	2734
722.634	1664	1557	1461	3221	2880	2847
725.806	1627	1469	1429	3025	3058	2878
728.975	1500	1537	1503	3136	2956	2709
732.149	1567	1678	1504	3182	2723	2699
735.335	1536	1529	1704	3164	2648	2769
738.526	1650	1557	1609	3264	2970	2859
741.716	1617	1580	1492	3322	3080	2662
744.903	1516	1455	1497	3056	2919	2725
748.078	1620	1663	1465	3043	2694	2834
751.254	1603	1844	1523	3235	2982	2557
754.43	1557	1548	1488	3329	3083	2898
757.597	1601	1601	1492	3132	3033	2881
760.765	1678	1550	1617	3293	3056	2613
763.934	1604	1624	1549	3195	2998	2915
767.116	1647	1483	1658	3044	2831	2714
770.295	1651	1700	1534	2771	2819	2772
773.46	1635	1528	1645	3201	2825	2633
776.678	1556	1696	1530	3118	2875	2731
779.843	1474	1570	1514	3049	2975	2601
783.011	1562	1681	1560	3115	2950	2689
786.195	1628	1614	1542	3054	2977	2719
789.414	1470	1657	1355	3371	2788	2874
792.61	1573	1590	1508	3166	2951	2944
795.774	1581	1446	1549	3189	2946	2662
798.98	1564	1519	1378	2979	3095	2595
802.181	1512	1530	1543	3189	2761	2699
805.355	1658	1597	1482	3144	2891	2824
808.535	1526	1707	1467	3013	3101	2634
811.698	1705	1717	1459	2900	2968	2782
814.873	1470	1493	1593	3133	2959	2718
818.038	1500	1501	1392	3188	2908	2627
821.214	1701	1429	1523	3141	2953	2600
824.379	1665	1700	1552	3095	2889	2949
827.555	1398	1554	1651	2712	2871	2697
830.768	1533	1659	1435	2960	2766	2796
833.944	1492	1633	1423	2900	2908	2721
837.125	1685	1726	1447	3055	2671	2723
840.303	1593	1634	1598	3003	2787	2721
843.487	1521	1554	1520	2945	2696	2681
846.666	1477	1690	1391	3123	2913	2650
849.875	1480	1648	1487	2955	2950	2603
853.069	1641	1563	1529	3106	2803	2601
856.237	1663	1593	1340	3178	3058	2615
859.409	1634	1668	1525	2988	2739	2695
862.627	1556	1511	1419	3110	2732	2592
865.823	1376	1569	1523	2851	2804	2608
868.991	1504	1454	1430	2910	2848	2650
872.165	1506	1573	1179	3038	2868	2562
875.341	1459	1478	1525	3021	2720	2692
878.507	1474	1630	1368	2916	2903	2547
881.691	1462	1413	1447	3135	2800	2684
884.879	1594	1474	1504	3019	2842	2719
888.045	1465	1617	1537	2871	2589	2578
891.228	1590	1491	1426	2779	2795	2726
894.402	1606	1505	1481	2800	2613	2664
897.577	1436	1573	1665	2965	2820	2741
900.763	1532	1530	1569	3129	2673	2431
903.954	1477	1404	1502	3168	2818	2664
907.123	1525	1559	1469	2820	2746	2640
910.296	1533	1535	1494	3132	2813	2513
913.499	1528	1625	1379	2857	2808	2477
916.684	1539	1555	1359	2988	2661	2541
919.893	1534	1496	1544	2964	2638	2478
923.07	1676	1512	1428	2990	2656	2731
926.251	1646	1543	1489	2941	2797	2528
929.416	1485	1359	1499	3007	2610	2556
932.655	1464	1630	1597	2949	2721	2489
935.832	1596	1426	1461	3221	2542	2794
939.009	1531	1466	1492	2969	2783	2530
942.193	1723	1505	1430	2842	2747	2779
945.38	1497	1501	1477	2836	2755	2694
948.56	1411	1595	1462	3010	2835	2439
951.753	1506	1512	1465	2979	2912	2440
954.95	1404	1301	1493	3023	3012	2655
958.118	1581	1622	1556	2967	2719	2454
961.299	1613	1684	1546	3031	2504	2643
964.469	1482	1477	1376	2874	2766	2506
967.675	1591	1423	1433	3130	2869	2698
970.863	1468	1550	1505	2804	2901	2658
974.031	1489	1598	1395	2843	2893	2610
977.201	1569	1646	1514	2981	2801	2616
980.399	1578	1436	1397	2888	2714	2706
983.592	1424	1605	1336	2756	2703	2523
986.774	1445	1511	1402	2999	2725	2782
989.941	1471	1555	1476	3092	2534	2401
993.122	1340	1481	1549	2726	2623	2546
996.314	1446	1434	1337	2882	2750	2674
999.497	1421	1579	1419	2976	2876	2707
1002.67	1441	1524	1350	3111	2750	2837
1005.85	1674	1622	1490	2957	2749	2477
1009.03	1678	1442	1493	3066	2742	2627
1012.22	1661	1421	1611	3072	2666	2621
1015.39	1434	1372	1498	2921	2644	2754
1018.6	1522	1539	1409	2881	2644	2692
1021.78	1306	1553	1434	2878	2820	2600
1024.96	1398	1610	1481	3169	2499	2327
1028.12	1526	1411	1547	2934	2697	2674
1031.31	1692	1524	1278	2912	2746	2411
1034.47	1405	1596	1342	2918	2736	2489
1037.66	1441	1486	1493	3038	2944	2606
1040.84	1453	1700	1493	2738	2543	2553
1044.01	1535	1445	1321	2879	2872	2669
1047.16	1422	1475	1344	2935	2694	2936
1050.36	1359	1488	1399	2754	2646	2563
1053.56	1474	1346	1574	2904	2682	2348
1056.73	1653	1532	1367	2789	2744	2614
1059.89	1494	1430	1440	2911	2795	2381
1063.07	1394	1513	1496	2763	2696	2482
1066.27	1395	1503	1417	2678	2735	2397
1069.44	1423	1624	1540	2777	2602	2498
1072.62	1509	1488	1411	2764	2720	2524
1075.8	1456	1520	1404	2815	2870	2629
1078.98	1544	1452	1410	2632	2630	2496
1082.17	1460	1562	1541	2952	2348	2586
1085.4	1557	1486	1310	2765	2531	2567
1088.58	1514	1431	1281	2852	2804	2565
1091.76	1609	1595	1497	2837	2788	2524
1094.92	1330	1641	1362	2707	2654	2352
1098.11	1385	1488	1313	2825	2756	2501
1101.3	1580	1499	1430	2823	2829	2363
1104.48	1542	1687	1473	3017	2678	2358
1107.66	1376	1403	1360	2878	2627	2461
1110.84	1571	1525	1576	2757	2616	2442
1114	1474	1469	1442	2847	2583	2390
1117.23	1399	1417	1499	3061	2736	2532
1120.41	1460	1460	1427	2908	2632	2709
1123.62	1368	1489	1514	2958	2688	2576
1126.83	1393	1726	1422	2747	2761	2508
1130.01	1520	1580	1399	2677	2713	2507
1133.21	1722	1505	1494	2872	2600	2422
1136.38	1538	1553	1497	2961	2772	2464
1139.55	1623	1420	1406	2824	2501	2497
1142.75	1426	1448	1398	2820	3015	2286
1145.91	1321	1522	1442	3022	2655	2619
1149.1	1509	1488	1492	2722	2799	2587
1152.28	1646	1556	1456	2758	2631	2578
1155.49	1410	1436	1504	2539	2634	2558
1158.67	1400	1411	1473	2797	2695	2329
1161.86	1537	1530	1341	2980	2579	2435
1165.06	1381	1656	1270	2830	2735	2359
1168.27	1280	1606	1517	3009	2548	2466
1171.43	1523	1351	1446	2506	2585	2410
1174.64	1329	1441	1376	2847	2656	2409
1177.8	1587	1404	1485	2500	2422	2491
1180.97	1441	1538	1374	2731	2639	2331
1184.16	1496	1571	1315	2786	2591	2672
1187.33	1564	1518	1396	2832	2731	2595
1190.51	1295	1521	1350	2670	2627	2480
1193.68	1529	1561	1353	2599	2658	2395
1196.87	1636	1753	1438	2817	2464	2577
1200.03	1516	1566	1363	2769	2628	2339
1203.21	1419	1437	1244	2725	2778	2484
1206.39	1310	1621	1330	2648	2574	2389
1209.56	1557	1556	1427	2815	2330	2570
1212.72	1544	1439	1558	2667	2589	2401
1215.91	1458	1385	1537	2495	2845	2301
1219.08	1474	1462	1298	2774	2787	2565
1222.25	1506	1530	1502	2445	2298	2447
1225.42	1433	1480	1472	2842	2743	2321
1228.59	1399	1268	1423	2815	2654	2579
1231.78	1455	1368	1414	2830	2420	2469
1234.97	1490	1491	1267	2577	2589	2645
1238.14	1435	1345	1546	2442	2624	2259
1241.31	1381	1654	1522	2788	2592	2673
1244.48	1432	1637	1534	2415	2596	2384
1247.66	1447	1541	1458	2608	2626	2144
1250.84	1444	1385	1305	2784	2498	2319
1254.02	1322	1609	1339	2736	2395	2376
1257.19	1519	1478	1330	2832	2568	2450
1260.45	1603	1402	1419	2981	2663	2490
1263.62	1406	1406	1445	3048	2688	2548
1266.82	1401	1412	1448	2879	2517	2419
1270.01	1488	1577	1428	2880	2689	2532
1273.18	1245	1410	1241	2840	2669	2492
1276.35	1338	1352	1346	2710	2660	2322
1279.53	1518	1455	1418	2554	2613	2565
1282.7	1452	1455	1234	2606	2610	2636
1285.89	1374	1584	1304	2661	2347	2480
1289.09	1344	1696	1393	2790	2332	2420
1292.27	1372	1398	1335	2967	2319	2451
1295.44	1513	1480	1384	2833	2423	2448
1298.62	1416	1680	1490	2663	2590	2388
1301.8	1379	1399	1423	2814	2548	2283
1304.96	1510	1635	1500	2808	2382	2174
1308.17	1418	1404	1482	2840	2631	2290
1311.35	1519	1439	1258	2546	2325	2344
1314.53	1331	1554	1379	2755	2470	2165
1317.72	1357	1610	1328	2593	2402	2260
1320.94	1333	1607	1322	2628	2541	2225
1324.12	1492	1491	1535	2421	2628	2342
1327.31	1368	1357	1515	2661	2498	2501
1330.51	1427	1299	1265	2667	2469	2527
1333.71	1403	1484	1280	2675	2403	2411
1336.9	1310	1348	1285	2819	2459	2192
1340.08	1329	1491	1515	2688	2570	2447
1343.26	1352	1458	1302	2562	2527	2305
1346.43	1479	1488	1264	2711	2654	2168
1349.63	1481	1493	1206	2734	2485	2352
1352.86	1342	1500	1455	2714	2681	2415
1356.06	1659	1446	1473	2540	2506	2269
1359.23	1419	1479	1406	2694	2575	2463
1362.4	1355	1529	1479	2771	2516	2208
1365.56	1250	1346	1392	2691	2316	2224
1368.76	1309	1410	1330	2551	2506	2449
1371.91	1335	1470	1463	2713	2563	2289
1375.08	1494	1440	1440	2791	2413	2338
1378.24	1562	1366	1414	2678	2596	2488
1381.43	1422	1614	1396	2841	2533	2424
1384.6	1536	1379	1444	2670	2447	2289
1387.8	1313	1384	1375	2675	2344	2404
1390.96	1441	1439	1447	2495	2680	2396
1394.15	1491	1480	1283	2770	2497	2291
1397.32	1488	1500	1577	2627	2644	2228
1400.49	1481	1494	1295	2762	2646	2505
1403.68	1449	1478	1395	2450	2388	2648
1406.87	1453	1392	1294	2511	2798	2317
1410.04	1512	1468	1313	2786	2335	2532
1413.2	1546	1295	1425	2824	2312	2231
1416.38	1377	1657	1314	2625	2597	2236
1419.55	1448	1561	1304	2511	2594	2500
1422.73	1392	1431	1509	2535	2541	2301
1425.9	1339	1453	1351	2764	2371	2356
1429.08	1454	1519	1404	2694	2555	2440
1432.26	1409	1351	1518	2567	2630	2173
1435.43	1315	1386	1395	2614	2571	2388
1438.6	1537	1469	1477	2539	2437	2294
1441.79	1368	1553	1487	2484	2488	2359
1445.05	1450	1461	1409	2275	2473	2301
1448.24	1488	1402	1294	2653	2567	2398
1451.4	1553	1280	1435	2678	2555	2392
1454.56	1334	1338	1412	2839	2442	2584
1457.74	1391	1438	1544	2708	2567	2182
1460.92	1585	1517	1382	2716	2454	2290
1464.11	1412	1570	1356	2501	2563	2419
1467.29	1453	1444	1218	2762	2477	2316
1470.46	1430	1372	1235	2692	2490	2520
1473.63	1426	1361	1291	2459	2559	2085
1476.81	1420	1564	1280	2460	2355	2245
1479.99	1414	1522	1285	2740	2463	2383
1483.16	1266	1350	1209	2624	2372	2443
1486.36	1437	1579	1408	2601	2474	2337
1489.54	1480	1588	1309	2638	2607	2348
1492.72	1471	1294	1309	2486	2474	2294
1495.9	1485	1358	1366	2567	2576	2376
1499.12	1403	1518	1455	2833	2339	2459
1502.3	1263	1502	1316	2749	2559	2216
1505.49	1394	1436	1312	2401	2427	2109
1508.7	1331	1706	1268	2652	2664	2493
1511.88	1435	1291	1519	2582	2702	2373
1515.04	1435	1470	1282	2515	2340	2267
1518.23	1416	1390	1373	2565	2212	2254
1521.41	1583	1454	1380	2322	2120	2244
1524.59	1384	1368	1328	2674	2445	2317
1527.79	1407	1568	1540	2583	2382	2444
1530.96	1357	1453	1361	2572	2348	2432
1534.16	1215	1463	1489	2563	2457	2434
1537.34	1361	1352	1345	2661	2437	2312
1540.51	1367	1485	1474	2638	2293	2217
1543.69	1470	1323	1419	2445	2489	2222
1546.86	1275	1402	1321	2498	2399	2478
1550.07	1538	1438	1241	2342	2434	2438
1553.24	1338	1418	1295	2733	2220	2149
1556.41	1336	1500	1401	2707	2618	2075
1559.57	1324	1359	1450	2733	2410	2271
1562.79	1472	1441	1450	2554	2298	2572
1565.95	1386	1472	1287	2644	2208	2276
1569.14	1339	1352	1207	2577	2349	2327
1572.31	1410	1461	1361	2444	2258	2361
1575.49	1271	1445	1363	2574	2337	2227
1578.67	1470	1595	1414	2661	2373	2109
1581.87	1407	1369	1300	2519	2569	2329
1585.04	1256	1507	1308	2498	2485	2314
1588.21	1465	1383	1326	2460	2177	2295
1591.4	1433	1389	1241	2829	2499	2070
1594.58	1523	1654	1346	2742	2419	2205
1597.74	1363	1350	1391	2402	2333	2099
1600.94	1421	1455	1362	2438	2641	2369
1604.12	1431	1366	1441	2467	2375	2225
1607.29	1356	1547	1308	2472	2372	2420
1610.46	1599	1317	1316	2334	2302	2143
1613.63	1370	1491	1438	2477	2488	2287
1616.85	1395	1392	1286	2693	2588	2209
1620.02	1460	1336	1315	2474	2292	2137
1623.2	1460	1286	1332	2496	2196	2305
1626.42	1233	1452	1348	2515	2309	2167
1629.62	1407	1564	1268	2535	2331	2262
1632.79	1367	1416	1319	2571	2601	2179
1635.95	1412	1191	1437	2602	2296	2231
1639.13	1202	1402	1443	2528	2454	2127
1642.32	1390	1553	1343	2633	2540	2162
1645.48	1437	1471	1283	2592	2216	2555
1648.66	1388	1357	1379	2316	2375	2248
1651.82	1415	1513	1237	2422	2459	2361
1654.98	1401	1443	1297	2478	2398	2215
1658.17	1495	1416	1300	2643	2555	2370
1661.34	1446	1421	1302	2452	2443	2293
1664.52	1456	1452	1381	2648	2387	2343
1667.69	1480	1388	1363	2391	2526	2310
1670.92	1454	1440	1207	2506	2449	2175
1674.11	1371	1512	1262	2523	2390	2184
1677.28	1424	1379	1333	2535	2365	2011
1680.49	1202	1410	1387	2488	2599	2146
1683.66	1410	1471	1327	2439	2110	2211
1686.84	1331	1444	1432	2490	2401	2294
1690.04	1409	1349	1224	2664	2276	2488
1693.24	1286	1418	1421	2524	2470	2226
1696.41	1400	1473	1261	2508	2363	2238
1699.58	1254	1326	1424	2496	2233	2116
1702.78	1391	1521	1194	2571	2462	2282
1705.98	1391	1350	1432	2507	2267	2157
1709.15	1240	1401	1248	2482	2408	2248
1712.35	1451	1295	1437	2752	2403	2205
1715.55	1414	1433	1280	2475	2316	2324
1718.75	1328	1418	1392	2478	2530	1960
1721.91	1434	1412	1442	2277	2241	2261
1725.08	1532	1456	1293	2394	2532	2328
1728.29	1233	1524	1309	2252	2285	2079
1731.45	1409	1320	1430	2528	2280	2154
1734.62	1437	1526	1293	2694	2480	2217
1737.79	1490	1514	1282	2452	2191	2249
1740.97	1430	1395	1460	2442	2235	2007
1744.14	1530	1456	1342	2530	2478	2063
1747.32	1635	1452	1348	2697	2257	2356
1750.49	1334	1399	1192	2732	2396	2236
1753.69	1394	1564	1394	2472	2291	2023
1756.87	1346	1378	1249	2407	2199	2374
1760.05	1405	1408	1198	2669	2367	2166
1763.21	1287	1279	1396	2382	2008	2207
1766.39	1336	1446	1229	2501	2380	2180
1769.59	1463	1425	1384	2394	2458	2204
1772.76	1398	1260	1363	2377	2289	2051
1775.95	1305	1390	1191	2544	2529	2176
1779.14	1348	1319	1329	2461	2297	2268
1782.35	1372	1512	1320	2569	2312	2149
1785.51	1419	1239	1339	2519	2347	2058
1788.67	1593	1241	1290	2474	2197	2193
1791.86	1507	1430	1385	2291	2243	2109
1795.03	1514	1336	1367	2461	2372	2312
1798.22	1318	1409	1259	2497	2538	2234

## Sheet: Figure 2-Fig Sup 1-Panel B bar
Time (s)	no atp			SWR1C basal			AB/AB 77N0 nucleosome			AB-apm/AB-apm 77N0 nucleosome			AB-apm/AB 77N0 nucleosome			AB/AB-apm 77N0 nucleosome
0	1601	1682		1586	1791
3.694	1601	1559		1642	1866
6.933	1627	1608		1845	1728
10.171	1690	1615		1674	1721
13.418	1763	1510		1570	1632
16.641	1648	1689		1883	1914
19.859	1816	1616		1848	2058
23.122	1508	1599		1872	1762
26.391	1782	1644		1801	1787
29.611	1743	1575		1717	1955
32.839	1643	1566		1847	1884
36.072	1467	1737		1795	1713
39.312	1630	1555		1871	1837
42.545	1769	1514		1850	1802
45.805	1661	1542		1831	1947
49.011	1714	1425		1772	1976
52.228	1655	1668		2009	2035
55.468	1626	1559		1778	1827
58.711	1654	1673		1996	1846
61.935	1798	1562		2003	1875
65.15	1722	1496		1964	1909
68.356	1613	1612		1953	1805
71.596	1620	1581		1773	1917
74.818	1589	1797		1918	1925
78.045	1697	1500		2055	1759
81.269	1808	1786		2028	1826
84.539	1600	1523		1883	1930
87.779	1554	1563		2022	1941
91.016	1633	1625		1897	2004
94.268	1710	1716		1847	1855
97.482	1487	1717		1965	1994
100.691	1530	1653		1901	1818
103.906	1660	1547		1897	1873
107.125	1745	1630		2038	1971
110.344	1657	1591		1828	1946
113.592	1648	1630		1884	1867
116.818	1613	1704		1776	1935
120.03	1637	1540		2081	1916
123.238	1487	1927		1795	2029
126.508	1539	1597		1923	1932
129.742	1599	1633		1865	1817
132.947	1581	1630		1959	1945
136.184	1636	1592		2121	2107
139.41	1643	1575		1923	2117
142.624	1816	1604		1907	2177
145.842	1734	1574		2141	2158
149.056	1788	1696		2148	1837
152.289	1582	1718		2081	2144
155.546	1568	1615		2001	2139
158.761	1558	1647		2081	2010
161.987	1774	1763		2101	2185
165.209	1700	1714		1971	1974
168.431	1679	1647		1914	2121
171.649	1612	1542		1980	1984
174.89	1591	1679		2125	1994
178.129	1625	1756		2169	2147
181.363	1570	1657		2073	1934
184.604	1635	1637		1981	2059
187.828	1557	1585		2260	2115
191.058	1635	1681		2032	2280
194.275	1506	1790		1931	1897
197.492	1694	1691		2010	1912
200.736	1689	1606		2171	2161
203.959	1754	1618		2240	2115
207.191	1610	1751		1940	2037
210.424	1814	1658		1986	2189
213.651	1579	1655		2201	2196
216.859	1665	1519		2052	2104
220.097	1646	1605		2056	2210
223.318	1510	1625		2164	2330
226.576	1649	1599		2022	2055
229.834	1558	1692		2111	2303
233.043	1529	1742		2184	2148
236.256	1691	1537		2142	2064
239.529	1657	1629		2207	2117
242.773	1669	1712		2137	2013
245.987	1572	1593		2244	2240
249.209	1661	1657		2169	2295
252.434	1555	1647		2180	2188
255.651	1781	1740		2095	2150
258.876	1773	1533		2184	2154
262.102	1593	1566		2198	2199
265.328	1606	1716		2225	2129
268.541	1713	1525		2150	2153
271.771	1550	1626		2049	2103
275.004	1769	1653		2250	2112
278.254	1611	1500		2118	2032
281.475	1795	1550		2185	2263
284.72	1713	1638		1919	2039
287.941	1675	1592		2357	2181
291.201	1561	1345		2169	2182
294.431	1541	1647		2220	2144
297.659	1719	1619		2149	2248
0							1482	1564	1571	1420	1518	1860
3.18							1679	1605	1493	1514	1503	1887
5.774							1559	1463	1454	1734	1892	1727
8.398							1679	1817	1563	1688	1758	1864
10.98							1547	1713	1530	1625	1631	1832
13.595							1532	1594	1613	1825	1673	1694
16.205							1636	1709	1570	1629	1716	1725
18.797							1552	1675	1744	1606	1577	1843
21.411							1803	1733	1463	1591	1859	1782
24.002							1598	1626	1501	1686	1835	1845
26.623							1625	1663	1667	1357	1808	2003
29.192							1661	1793	1661	1627	1750	1788
31.778							1800	1795	1664	1624	1938	1802
34.399							1749	1912	1839	1567	1632	1876
36.984							1807	1771	1772	1596	1747	1652
39.566							1830	1638	1875	1598	1864	1703
42.147							1869	1730	1723	1590	1816	1914
44.731							1840	1907	1729	1587	1767	1679
47.314							1822	1717	1683	1670	1832	1771
49.912							1938	1771	1725	1535	1702	1855
52.489							1888	1749	1937	1674	1864	1742
55.087							1913	1745	1739	1500	1851	1873
57.663							1958	1670	1862	1717	1771	1860
60.246							1966	1552	1753	1878	1887	1748
62.844							2018	1662	1718	1699	1887	1957
65.439							1895	1816	1817	1677	1830	1727
68.024							1858	1899	1835	1842	1771	1916
70.625							1734	1737	1768	1771	1595	1691
73.258							1931	1913	1835	1620	1871	1871
75.86							1794	1971	1836	1817	1959	1742
78.456							1982	1933	1901	1493	1844	1837
81.094							1966	1859	1958	1802	1791	1931
83.673							1867	1675	1906	1760	1771	1776
86.244							1919	1772	2045	1654	1861	2035
88.841							2017	1884	1864	1763	2004	1894
91.424							1843	1850	1714	1757	1807	2089
93.994							1727	1869	2029	1891	1915	2036
96.561							2004	1940	2185	1646	1681	1859
99.162							1969	1949	1981	1812	1794	1854
101.78							1812	1755	2093	1618	2027	1885
104.377							1833	1937	1964	1904	1753	1796
106.958							2040	1978	2011	1697	1642	1862
109.534							1817	1835	2021	1702	1975	1922
112.115							2001	1929	1999	1849	1878	1866
114.679							1999	2017	2083	1634	1939	2011
117.265							2183	1982	1966	1912	1886	1971
119.837							1917	2070	1888	1752	1813	1787
122.42							1910	1919	1830	2022	1828	1990
124.999							2137	2219	1839	1706	1766	1961
127.592							1933	2030	1927	1835	2028	1999
130.182							2176	2079	2094	2056	1760	2001
132.806							2059	1934	1892	1650	1717	1963
135.394							2009	1901	1897	1882	1904	2045
137.989							2005	2008	2012	1768	1910	1893
140.584							1978	1834	2045	1700	1977	1821
143.154							1975	2103	1983	1719	1967	1850
145.736							1950	2110	2038	1934	1987	1938
148.312							1989	2121	2007	1914	1904	2049
150.918							2003	2126	1927	1860	1744	1885
153.494							2165	2087	1964	1789	2068	2104
156.061							2080	2076	1940	1950	1914	1972
158.641							2127	2157	2038	1906	1818	1923
161.283							2082	2028	2009	1825	1920	2075
163.855							1980	2086	1855	1868	1855	2095
166.441							1960	1961	1890	1877	1914	2024
169.019							2190	2030	1967	1926	1968	1767
171.612							1981	2248	1944	1831	2005	1896
174.217							2205	2196	1946	1886	2050	1974
176.833							2197	2097	2107	1879	1922	1927
179.407							2097	2075	2135	1749	1994	1950
181.987							2209	2165	1939	1764	2035	1822
184.615							2033	2161	2056	2068	1906	2199
187.209							2093	2089	1973	2029	1767	1958
189.783							2083	2117	2030	1809	2017	2112
192.376							2351	2158	2115	1893	1951	1933
194.971							2186	2094	1946	1958	2056	2019
197.533							2017	2257	1790	1797	2134	2048
200.117							2205	2176	2008	1603	2047	1753
202.721							2132	1967	1888	1887	2070	1904
205.305							2267	2257	1934	1886	1903	2117
207.912							2074	2137	1890	1848	2056	2120
210.483							2252	2114	2083	1724	1893	2138
213.066							2154	2245	2122	2006	2110	2044
215.633							2139	2268	2059	2130	1923	2102
218.229							2074	2129	1996	1837	2060	2044
220.799							2422	2225	1944	2015	2048	1832
223.379							2086	2137	2007	1988	2006	2062
225.969							2279	2179	1990	1932	1939	1953
228.55							2343	2259	2102	1989	2202	2115
231.127							2122	2045	2078	2002	1910	1861
233.701							2399	2384	1967	2033	2024	1930
236.286							2152	2394	2173	1861	1928	2066
238.875							2252	2234	1973	1914	2099	2099
241.443							2301	2146	2022	2053	2121	2092
244.034							2251	2218	2000	2083	2165	2042
246.621							2119	2119	1990	2254	2178	2045
249.187							2168	2140	1930	2011	2029	2081
251.765							2437	2136	2054	2045	2192	2262
254.342							2154	2329	2050	1907	2257	2025
256.957							2279	2233	2154	2099	2201	2118
259.53							2328	2200	2160	2055	2153	2020
262.104							2481	2280	1995	2033	1954	1976
264.681							2227	2297	2223	2031	2172	2117
267.27							2354	2427	1972	2055	2205	2020
269.843							2290	2343	2162	2160	2118	2175
272.473							2257	2104	2081	2004	1990	2197
275.068							2275	2355	2222	2017	2105	1984
277.644							2439	2221	2069	1999	2097	2089
280.211							2210	2238	2225	1967	2173	2106
282.821							2447	2313	2293	2038	2137	2201
285.417							2214	2121	2128	2005	2229	2150
287.986							2187	2424	2271	1856	2172	2017
290.598							2534	2464	1986	1844	2038	1988
293.176							2396	2177	1988	2092	2094	2011
295.767							2471	2318	1987	2140	2237	2130
298.342							2254	2343	2060	2192	1945	2209
0													2044	1953	1875	1962	2057	2182
4.02													2042	1852	2016	1928	2062	1984
7.543													1892	2042	1999	2010	2173	1986
11.092													2164	2148	2186	1881	2185	1991
14.629													1984	1921	2076	2136	2095	2150
18.169													2181	2135	2048	1827	2329	1794
21.715													2208	2104	2159	2141	2095	2141
25.245													1974	2197	2067	1973	1978	1992
28.797													2121	2038	2019	2043	2070	1944
32.395													2087	2039	2279	2161	2115	2146
35.935													2197	2242	1951	1999	2364	1985
39.469													2035	2211	2300	2217	2263	2274
43.015													2140	2053	2157	2329	2216	2239
46.542													2168	2259	2104	2087	2330	2040
50.102													2150	2162	2117	2228	2219	2183
53.641													2524	2016	2161	2101	2278	2143
57.181													2204	2290	2189	2126	2219	2178
60.701													2256	2100	2289	2170	2350	2350
64.258													2456	2315	2229	2203	2174	2373
67.831													2165	2245	2190	2204	2187	2230
71.362													2238	2203	2107	2166	2254	2148
74.938													2107	2231	2273	2243	2185	2310
78.514													2357	2059	2303	2338	2236	2182
82.085													2332	2137	2163	2289	2135	2274
85.632													2429	2428	2021	2224	2332	2232
89.198													2350	2333	2206	2301	2180	2470
92.726													2368	2176	2143	2285	2340	2368
96.283													2252	2189	2090	2258	2480	2213
99.842													2298	2305	2306	2141	2235	2357
103.376													2462	2233	2196	2227	2343	2276
106.918													2400	2115	2389	2219	2282	2210
110.504													2351	2286	2482	2370	2258	2451
114.057													2497	2373	2371	2186	2252	2196
117.627													2435	2194	2333	2453	2444	2410
121.165													2293	2205	2376	2477	2510	2324
124.694													2394	2290	2257	2376	2523	2386
128.24													2230	2134	2220	2378	2356	2305
131.79													2521	2407	2364	2488	2322	2214
135.324													2282	2423	2176	2122	2447	2337
138.904													2347	2171	2237	2230	2391	2351
142.459													2471	2236	2173	2324	2528	2515
146.035													2301	2252	2334	2078	2197	2257
149.576													2364	2361	2352	2229	2487	2461
153.119													2454	2325	2343	2244	2293	2441
156.657													2321	2420	2456	2195	2594	2414
160.185													2426	2212	2415	2114	2456	2401
163.744													2358	2223	2141	2418	2302	2376
167.276													2240	2314	2556	2293	2266	2486
170.846													2578	2416	2439	2297	2422	2288
174.384													2398	2354	2389	2301	2377	2452
177.934													2323	2388	2273	2265	2454	2322
181.483													2505	2248	2368	2456	2445	2306
185.033													2418	2348	2266	2186	2429	2371
188.565													2391	2290	2325	2079	2413	2331
192.128													2273	2213	2445	2146	2458	2516
195.666													2819	2503	2518	2314	2275	2421
199.232													2473	2402	2278	2546	2445	2472
202.748													2732	2494	2441	2445	2465	2465
206.337													2598	2238	2363	2327	2383	2435
209.872													2403	2322	2211	2416	2491	2398
213.436													2295	2407	2407	2368	2435	2360
216.968													2603	2368	2345	2261	2438	2551
220.503													2442	2377	2422	2297	2579	2237
224.057													2551	2465	2440	2423	2446	2616
227.631													2270	2371	2350	2383	2311	2496
231.194													2380	2348	2290	2684	2496	2371
234.728													2379	2331	2401	2571	2333	2476
238.257													2354	2437	2350	2436	2288	2499
241.81													2524	2263	2427	2606	2443	2555
245.347													2333	2284	2619	2452	2416	2563
248.885													2584	2363	2253	2435	2534	2467
252.407													2424	2244	2503	2320	2338	2373
255.949													2453	2363	2305	2355	2324	2474
259.478													2370	2296	2401	2416	2557	2472
263.017													2524	2269	2402	2463	2564	2371
266.586													2174	2379	2502	2599	2404	2402
270.132													2490	2532	2402	2213	2303	2275
273.673													2354	2394	2461	2401	2358	2434
277.195													2478	2360	2394	2340	2489	2391
280.727													2461	2360	2459	2558	2396	2477
284.267													2630	2301	2507	2350	2541	2580
287.793													2443	2465	2402	2225	2274	2480
291.339													2387	2282	2356	2426	2471	2237
294.863													2728	2450	2508	2196	2629	2440
298.43													2315	2316	2362	2625	2416	2488

## Sheet: Figure 2-Fig Sup 1-Panel B CI
		No ATP			SWR1C basal			AB/AB 77N0 nucleosome			AB-apm/AB-apm 77N0 nucleosome			AB-apm/AB 77N0 nucleosome			AB/AB-apm 77N0 nucleosome
SWR1C		0.00208036	0	0.0995879	1	1.11332	0.886676	1.4533	1.55288	1.35302	0.983516	1.07967	0.888049	0.845467	0.958791	0.732143	0.879121	0.993819	0.76511

## Sheet: Figure 2-Fig Sup 1-Panel C bar
	Time (s)	SWR1C Basal			SWR1Cswc5∆+rSwc579-303 Basal			SWR1Cswc5∆+rSwc579-303 + AB/AB 77N0 nucleosomes			SWR1Cswc5∆+rSwc579-303 + AB/AB 77N0 nucleosomes +ZB dimer			SWR1Cswc5∆+rSwc5LDW-3A + AB/AB 77N0 nucleosomes			SWR1Cswc5∆+rSwc5LDW-3A + AB/AB 77N0 nucleosomes +ZB dimer
	0	0	0
	4	1025.5	-1089.5
	8	1890.5	818.5
	12	-1369	122
	16	-1025	-1505
	20	-136	-745
	24	-736	-864
	28	1746	929
	32	-1641.5	-1160.5
	36	1099	1995
	40	-769.5	881.5
	44	457	2652
	48	-1681	913
	52	-1728.5	-2112.5
	56	833.5	81.5
	60	-296	1419
	64	-159	722
	68	401	-289
	72	1042.5	1603.5
	76	231.5	-216.5
	80	-303.5	-1633.5
	84	-2218	-1497
	88	1313	578
	92	2523	-152
	96	-960.5	720.5
	100	513	-1665
	104	-2441	-2025
	108	-2114.5	481.5
	112	1602	-399
	116	649	473
	120	1010	1683
	124	-833.5	433.5
	128	569.5	1002.5
	132	1266	65
	136	-695.5	681.5
	140	2178.5	705.5
	144	-4830	-103
	148	3861	2884
	152	1297.5	48.5
	156	4021	3396
	160	1987	3525
	164	-471.5	-1064.5
	168	1635	1154
	172	1104.5	1778.5
	176	1827.5	-447.5
	180	88.5	-2330.5
	184	2699	953
	188	1185.5	4133.5
	192	-1754	2267
	196	3237	1875
	200	2796	986
	204	1522	881
	208	897.5	1409.5
	212	-753	353
	216	4429.5	2443.5
	220	3516	4718
	224	4774.5	1218.5
	228	-400	-1761
	232	3444.5	3700.5
	236	1466	602
	240	2171.5	3260.5
	244	4398	3197
	248	4108.5	3292.5
	252	4077	3437
	256	4494.5	4975.5
	260	2731.5	4108.5
	264	4582	3301
	268	3733.5	1714.5
	272	4045.5	2507.5
	276	1755	4671
	280	4093	3068
	284	4165.5	2995.5
	288	5198.5	2058.5
	292	5287	3205
	296	3500.5	1002.5
	300	6215	5783
	304	2725	2228
	308	2147	3093
	312	1898.5	2090.5
	316	7472.5	5935.5
	320	5277.5	2507.5
	324	-320	3044
	328	3501	4606
	332	1587	2932
	336	2875.5	4413.5
	340	4020.5	4181.5
	344	9179	7225
	348	3101	6272
	352	4309.5	2499.5
	356	1970.5	1458.5
	360	4694	3829
	364	5358	7233
	368	2859.5	4957.5
	372	1683.5	2339.5
	376	6320.5	4702.5
	380	6953	5463
	384	4741.5	3924.5
	388	8819.5	6176.5
	392	9051.5	4726.5
	396	8315	7994
40.896					54	77	24	90	67	69	121	57	112
45.449					66	108	36	77	54	81	75	83	130
49.985					55	112	92	54	76	98	53	102	143
54.532					51	85	56	64	60	82	79	94	146
59.075					79	89	28	65	70	63	97	105	93
63.618					69	82	61	83	81	83	127	88	113
68.157					42	114	31	103	96	81	115	119	169
72.7					38	78	43	100	117	70	127	105	114
77.24					65	82	27	94	61	74	115	125	143
81.785					57	106	54	120	93	116	132	117	151
86.331					82	113	60	58	78	94	138	121	161
90.871					82	108	61	91	91	118	125	141	116
95.416					52	87	68	101	95	118	161	154	149
99.962					51	99	65	120	90	104	159	146	188
104.5					79	121	59	106	103	141	159	173	172
109.039					79	93	75	134	111	119	167	174	186
113.584					76	97	73	131	89	115	163	177	179
118.141					76	119	45	166	121	104	183	174	200
122.67					71	82	65	123	67	146	169	142	198
127.223					92	114	55	124	118	86	184	131	209
131.775					87	115	34	101	133	137	171	165	243
136.322					93	91	71	128	72	146	178	176	197
140.859					82	109	61	86	137	127	213	211	221
145.403					91	132	40	100	84	138	202	201	252
149.942					118	114	24	123	84	118	176	203	182
154.486					88	111	83	110	131	127	191	141	199
159.056					92	67	85	122	94	120	214	188	233
163.594					68	163	84	120	102	133	211	185	231
168.144					97	117	64	161	103	155	184	226	209
172.687					101	125	104	140	104	117	214	178	224
177.225					38	138	147	117	110	134	197	198	274
181.772					75	139	77	143	126	125	197	238	266
186.318					70	134	86	164	140	186	173	229	235
190.861					95	93	83	139	90	170	222	244	236
195.408					80	120	62	106	117	109	223	196	220
199.948					76	118	108	125	126	143	189	194	244
204.489					88	123	88	138	117	160	189	215	250
209.029					57	119	49	145	105	136	193	205	257
213.573					61	128	78	112	118	124	251	224	272
218.115					80	116	127	157	131	134	259	238	260
222.658					91	112	110	184	136	114	267	240	296
227.198					73	111	85	187	126	140	244	238	250
231.75					55	132	129	159	170	144	223	229	205
236.289					83	141	58	152	125	178	186	219	263
240.826					82	121	52	129	105	157	253	269	310
245.371					97	117	74	177	136	164	224	258	280
249.912					132	115	110	138	161	157	247	288	263
254.462					94	121	73	173	158	128	267	257	300
259.002					108	114	86	135	153	201	245	245	267
263.547					79	140	60	130	153	156	201	317	322
268.087					118	146	87	128	141	161	211	246	305
272.636					66	140	77	153	138	157	263	289	319
277.186					108	124	119	129	147	199	257	252	288
281.722					132	115	91	168	161	166	290	288	289
286.279					90	89	83	210	172	147	284	255	297
290.828					106	137	85	120	101	252	235	266	322
295.377					166	151	124	138	188	170	263	337	314
299.917					133	130	135	165	186	165	285	281	322
304.472					131	130	126	170	163	197	317	299	330
309.011					110	145	79	152	180	172	282	311	319
313.559					160	159	77	138	154	177	309	276	330
318.104					97	119	63	184	185	199	311	309	359
322.649					142	153	93	166	193	228	336	339	311
327.192					86	146	124	192	148	234	304	318	310
331.737					100	110	104	141	163	187	295	312	332
336.277					114	130	108	205	178	195	278	306	362
340.818					125	143	64	193	208	221	347	267	357
345.367					122	113	70	215	161	213	320	322	339
349.911					143	154	132	199	159	230	294	340	348
354.456					124	137	126	218	178	222	344	305	349
359.005					98	160	115	186	168	193	341	325	366
363.551					126	161	141	193	232	193	308	318	370
368.092					135	150	90	189	181	213	349	349	376
372.636					131	119	149	227	205	234	331	337	356
377.186					139	197	128	226	206	214	354	356	364
381.725					110	167	109	187	165	218	363	328	355
386.283					98	166	131	228	170	227	332	332	350
390.822					140	144	158	196	166	192	336	353	394
395.368					140	133	112	219	194	249	357	367	389
399.907					156	135	82	176	192	213	354	388	379
404.455					147	177	133	205	179	240	384	336	404
409.003					155	179	96	242	190	237	364	336	383
413.551					151	131	129	133	212	232	343	373	404
418.086					132	198	172	224	208	256	347	340	407
422.636					158	179	154	235	207	262	369	349	423
427.187					123	165	160	200	212	235	382	422	379
431.743					149	149	162	233	204	241	365	372	422
436.291					135	181	183	193	213	233	353	345	406
440.843					145	155	130	240	237	250	383	357	403
445.387					175	184	185	243	220	269	369	384	414
449.938					162	164	142	244	226	239	353	361	452
454.491					163	124	159	220	224	291	377	383	450
459.03					182	157	152	243	224	244	381	416	461
463.571					159	162	167	205	219	237	385	391	443
468.111					168	186	136	239	220	281	375	407	449
472.651					176	195	170	245	238	257	376	409	449
477.196					163	177	205	254	235	247	410	434	451
481.739					168	198	165	262	214	273	348	419	439
486.271					142	202	182	235	228	275	394	391	419
490.82					175	179	139	276	247	278	419	411	448
495.362					148	209	185	251	230	235	413	407	432
499.904					168	166	148	213	232	269	408	395	433
504.447					154	186	133	275	218	256	417	409	465
508.985					176	182	165	208	230	262	394	402	446
513.534					167	166	141	264	240	296	419	416	430
518.074					159	195	136	214	256	305	404	423	438
522.612					168	174	123	282	252	281	408	391	450
527.162					197	178	157	260	247	280	412	417	464
531.703					161	185	165	252	267	287	413	427	453
536.246					201	184	167	298	218	289	429	415	468
540.793					143	194	149	252	295	279	463	440	448
545.337					194	197	189	264	269	279	397	417	471
549.887					169	187	136	274	290	282	453	408	475
554.426					190	202	139	251	288	276	398	465	494
558.969					184	171	158	213	264	290	434	453	486
563.515					179	200	163	264	254	287	480	462	480
568.055					204	210	180	267	270	312	434	457	492
572.594					194	210	162	271	226	320	426	449	529
577.15					179	200	160	276	257	294	442	461	449
581.699					196	211	195	223	276	283	437	472	494
586.248					222	177	185	265	292	298	463	445	508
0														0	0	0	0	0	0
4.553														-4	-3	-27	19	35	-28
9.096														-2	-12	13	44	18	-47
13.645														26	26	33	38	45	1
18.192														29	13	11	63	51	13
22.739														45	19	36	99	53	44
27.278														33	96	37	119	77	23
31.817														82	73	88	89	76	56
36.354														62	33	103	110	57	63
40.896														58	69	93	125	91	75
45.449														55	71	86	101	78	23
49.985														73	110	79	108	98	63
54.532														108	78	98	117	70	4
59.075														50	55	60	98	90	55
63.618														80	85	107	89	94	60
68.157														78	51	47	113	99	54
72.7														72	77	86	110	111	65
77.24														85	87	105	119	131	53
81.785														51	61	75	134	103	44
86.331														78	102	88	61	108	52
90.871														74	80	94	137	105	75
95.416														87	41	93	140	98	72
99.962														74	101	58	155	93	72
104.5														97	103	96	108	104	60
109.039														103	108	118	161	122	73
113.584														117	105	74	145	143	57
118.141														106	83	53	122	113	79
122.67														51	66	58	165	121	55
127.223														97	81	73	112	115	74
131.775														75	68	68	149	126	76
136.322														87	112	100	164	110	79
140.859														93	57	61	189	115	76
145.403														76	120	71	190	90	93
149.942														137	105	102	203	120	65
154.486														93	87	78	100	129	59
159.056														99	52	60	172	97	54
163.594														87	98	110	175	134	83
168.144														103	64	10	201	116	99
172.687														98	88	111	172	117	84
177.225														114	80	107	157	101	91
181.772														63	21	100	163	129	80
186.318														97	95	133	151	91	15
190.861														107	60	107	197	179	56
195.408														89	91	52	111	157	51
199.948														145	86	81	161	128	119
204.489														83	73	74	153	168	36
209.029														94	86	83	94	138	23
213.573														140	104	84	180	83	82
218.115														72	76	132	169	87	69
222.658														72	58	82	169	76	57
227.198														105	47	99	131	127	32
231.75														108	95	98	120	125	84
236.289														31	46	69	197	129	78
240.826														109	87	119	111	79	40
245.371														106	104	88	117	127	76
249.912														68	115	122	178	140	104
254.462														26	92	64	157	125	50
259.002														75	121	79	158	140	6
263.547														109	95	104	138	156	18
268.087														127	107	136	184	97	62
272.636														89	58	73	93	131	96
277.186														80	69	100	184	115	76
281.722														130	97	99	203	110	103
286.279														90	53	127	107	124	83
290.828														125	70	73	133	101	51
295.377														167	97	108	97	89	77
299.917														100	55	93	155	114	96
304.472														78	95	82	179	162	45
309.011														103	75	53	197	97	88
313.559														100	84	93	172	127	90
318.104														108	76	90	150	161	104
322.649														124	79	97	198	123	81
327.192														87	55	57	146	88	74
331.737														137	119	68	182	118	89
336.277														83	116	47	136	92	127
340.818														161	86	84	159	158	90
345.367														104	82	81	208	196	50
349.911														110	88	69	212	173	94
354.456														109	108	112	155	104	84
359.005														63	88	130	177	132	67
363.551														136	76	159	213	118	81
368.092														143	130	86	235	133	92
372.636														103	85	139	204	151	42
377.186														124	103	85	160	150	92
381.725														83	78	79	182	158	101
386.283														122	115	59	164	148	52
390.822														128	122	59	212	156	80
395.368														135	153	149	175	144	110
399.907														122	91	77	251	170	108
404.455														79	70	52	193	145	109
409.003														130	108	78	195	134	116
413.551														101	129	124	207	162	118
418.086														99	139	92	161	131	102
422.636														121	133	43	195	110	106
427.187														100	104	144	228	163	98
431.743														132	124	107	210	165	113
436.291														125	98	75	200	141	118
440.843														122	98	106	203	164	115
445.387														111	125	71	176	150	91
449.938														125	109	73	245	127	72
454.491														92	72	113	205	177	124
459.03														143	127	124	216	175	120
463.571														144	107	99	240	158	117
468.111														145	85	138	266	135	112
472.651														133	140	136	228	163	110
477.196														144	133	90	255	163	115
481.739														113	66	104	243	126	159
486.271														146	108	120	280	174	114
490.82														122	108	78	188	174	103
495.362														132	111	87	252	139	110
499.904														152	142	110	183	168	110
504.447														129	125	133	279	143	95
508.985														146	115	128	269	178	130
513.534														147	122	133	280	181	144
518.074														130	152	78	237	152	135
522.612														130	130	81	259	119	91
527.162														124	117	118	261	178	118
531.703														113	145	134	230	179	83
536.246														133	113	135	257	191	93
540.793														151	148	120	271	168	126
545.337														116	136	146	229	155	114
549.887														131	134	119	265	166	77
554.426														96	129	85	204	150	150
558.969														168	99	147	271	183	86
563.515														145	127	132	257	161	133
568.055														132	90	103	240	189	93
572.594														124	121	100	223	192	141
577.15														140	160	122	216	168	95
581.699														110	155	103	236	161	127
586.248														130	137	131	265	133	94

## Sheet: Figure 2-Fig Sup 1-Panel C CI
		Basal			AB/AB 77N0 nucleosome			AB/AB 77N0 nucleosome + ZB Dimer
Basal		1	0.131	0.131
SWR1Cswc5∆+rSwc579-303					1.63	0.067	0.067	2.85	0.075	0.075
SWR1Cswc5∆+rSwc5LDW-3A					0.77	0.097	0.097	1.25	0.177	0.177
