# Supplementary material for: Dual engagement of the nucleosomal acidic patches is essential for deposition of histone H2A.Z by SWR1C
Source: eLife. 2024 May 29;13:RP94869. doi: 10.7554/eLife.94869 (PMC11139478; doi:10.7554/eLife.94869)
Supplement: Figure 2—source data 1. [file elife-94869-fig2-data1.xlsx]

## Sheet: Figure 2-Panel A
[SWR1C]	AB/AB 77N0-Cy3
0	88	81.8	88.1	79.6
0.922852	85.2	91.5	85.2	89.2
1.8457	88.6	82.4	86.8	90.8
3.69141	81	81.1	81	89.4
7.38281	86.8	93.9	91.7	88.3
14.7647	89	83.8	89.8	87.8
29.5312	90.9	96.8	92.6	91.1
59.0625	92.1	89.5	88.9	87.6
118.125	96.6	96.3	98.2	92.6
236.25	95.7	98.5	95.4	105.2
472.5	101.2	102.1	103.3	95.8
945	96.2	98.6	100.6	103.9

## Sheet: Figure 2-Panel B
[Swr1C]	AB/AB-apm 77N0-Cy3
0	91	86.5	91.4
0.894	86.3	90	91.6
1.787	89.1	90.3	90.7
3.574	88.5	89.5	88.9
7.148	88.8	87.4	82
14.297	88.4	88.2	90.4
28.594	87	87.2	86.5
57.188	84.9	85.4	83.2
144.375	79.6	85.5	84.4
228.75	88.2	90.4	85.6
457.5	86.9	85.1	83.7
915	85	82	85.9

## Sheet: Figure 2-Panel C
[Swr1C]	AB-apm/AB 77N0-Cy3
0	85.2	85.6	79.6
0.894	80.1	82.5	86.8
1.787	83	81.5	84.8
3.574	84.8	80.5	82.7
7.148	82.8	86.2	85.6
14.297	84.6	84.6	85.6
28.594	83.3	84.1	83.3
57.188	81.6	81.4	82.2
144.375	85.8	86.4	85.6
228.75	86.7	85.4	82.2
457.5	90.5	91.1	88
915	86.8	86	88.8

## Sheet: Figure 2-Panel D
[Swr1C]	AB-apm/AB-apm 77N0-Cy3
0	90.9	92.3	90
0.894	89.6	85.5	89.2
1.787	92.8	93.9	89.2
3.574	85.8	88	87.2
7.148	89.1	92.3	86.8
14.297	89.2	87.6	93.6
28.594	83.4	79.6	86.4
57.188	91.4	95.5	92.8
144.375	92.8	91.2	95.6
228.75	90.3	92.3	97.7
457.5	99.3	98.2	97.2
915	100.2	102.4	97.8
