# Supplementary material for: Dual engagement of the nucleosomal acidic patches is essential for deposition of histone H2A.Z by SWR1C
Source: eLife. 2024 May 29;13:RP94869. doi: 10.7554/eLife.94869 (PMC11139478; doi:10.7554/eLife.94869)
Supplement: Figure 3—source data 1. [file elife-94869-fig3-data1.xlsx]

## Sheet: Figure 3-Panel B
Time (sec)	SWR1Cswc5∆+ rSwc5			SWR1Cswc5∆			SWR1Cswc5∆+rSwc5LDW-3A			SWR1Cswc5∆+rSwc579-303			SWR1Cswc5∆+rSwc5RRKR-4A
0.06	1			1			1	1		1	1	1	1	1
3.01	1.01577			0.978932			0.98	1.01
4.03	1.01132			0.990176			1	1.01					0.99	0.96
5.05	1.0009			0.963619			0.99	1
6.06	1.01087			0.997114			0.98	1		0.982595	0.938971	0.959619	1	0.97
7.11	1.00406			0.973761			0.98	0.99
8.11	1.00676			0.962535			1	0.99					1.03	0.94
9.13	1.00611			0.989339			0.99	1
10.17	1.00512			0.988			0.99	1.01		0.970728	0.941509	0.923049	0.99	1.03
11.18	0.977624			0.983912			0.98	1.02
12.23	0.986547			0.968617			1	0.98					1.03	1.04
13.26	0.981011			0.982501			1.01	0.98
14.28	0.992074			0.981454			0.98	1		0.958861	0.937817	0.923526	1.03	0.98
15.29	0.962426			0.980189			1	1
16.32	0.98971			0.978923			1	1.01					1	1
17.32	0.990776			0.988428			1	1.01
18.32	0.981638			0.987991			0.97	0.99		0.951062	0.956968	0.930673	0.96	0.97
19.27	0.970033			0.988702			0.99	0.99
20.29	0.977865			0.971977			0.98	1					1.02	1.02
21.3	0.979635			0.973461			1	1.02
22.29	0.962383			0.983557			1.01	0.99		0.923599	0.934702	0.936629	1	1.01
23.28	0.953606			0.998926			1	0.99
24.31	0.970704			0.970156			1.01	1.01					0.99	1.02
25.32	0.96173			0.974927			0.99	1
26.31	0.958033			0.967952			1	1.01		0.93524	0.929626	0.929244	1.03	1.04
27.32	0.968675			0.98079			0.99	1.02
28.31	0.972441			0.992352			0.98	1.01					0.99	0.97
29.31	0.965159			0.975955			1	1.01
30.28	0.988653			0.969446			0.98	1		0.939421	0.94174	0.919833	0.98	1.05
31.32	0.961498			0.991861			0.99	1.01
32.31	0.948276			0.97784			0.99	1					0.97	1.03
33.32	0.972776			0.966232			0.98	0.99
34.32	0.950383			0.9632			0.98	1.01		0.932414	0.92282	0.921501	0.99	1.01
35.28	0.960758			0.973424			0.99	1
36.28	0.954534			0.970565			0.99	1.01					1.01	1
37.28	0.941202			0.979688			0.98	1.01
38.32	0.958944			0.973351			1.01	1		0.941343	0.921897	0.910066	1.06	1.04
39.31	0.957689			0.97123			0.99	1.01
40.31	0.962477			0.984659			0.98	1					1.02	1.07
41.31	0.943471			0.969054			0.99	1.01
42.31	0.960784			0.969455			1	1		0.92179	0.937471	0.911733	1	1.08
43.3	0.939079			0.978159			0.99	1
44.3	0.951801			0.993764			0.99	1					0.98	1.03
45.29	0.949686			0.977494			0.99	1
46.32	0.932365			0.960715			1.01	0.99		0.922355	0.935625	0.901013	1	1.05
47.32	0.946334			0.99349			0.99	1.01
48.32	0.931832			0.982101			0.99	1.02					1.06	0.99
49.31	0.942474			0.963928			1	0.99
50.29	0.946299			1.00042			0.97	1		0.939082	0.924204	0.93115	1.01	1.03
51.31	0.941417			0.984049			0.99	1.01
52.33	0.928411			0.976675			0.99	1.02					1.02	0.96
53.32	0.927396			0.973169			0.99	1
54.31	0.953718			0.977485			0.99	1.02		0.91953	0.928357	0.925194	1.06	1.01
55.28	0.929734			0.970183			1	1
56.28	0.914399			0.978559			0.99	1					1.01	0.96
57.29	0.928368			0.984787			1	1.01
58.31	0.917278			0.984777			0.99	1		0.930606	0.92778	0.909827	0.99	1.03
59.32	0.918508			0.969427			0.98	1.01
60.32	0.926081			1.00004			1	0.99					1.01	1.04
61.33	0.927379			0.994984			1	1.02
62.33	0.929382			0.980334			0.98	0.99		0.920547	0.924204	0.89994	0.97	1.03
63.33	0.947658			0.994556			1	1
64.28	0.933818			0.997077			1	0.99					1.03	1.09
65.3	0.934901			1.00208			0.98	1.01
66.29	0.923958			0.986862			1	1.01		0.933318	0.920974	0.885527	0.98	0.98
67.31	0.928153			0.98251			0.99	1.01
68.33	0.908089			0.987363			1	1.01					0.99	1.06
69.32	0.932863			0.977048			0.99	1
70.32	0.911141			0.976356			0.98	1		0.916365	0.917051	0.923407	1.03	1.01
71.32	0.927422			0.989066			1.01	1
72.32	0.932236			0.995247			1.01	1					0.95	0.99
73.32	0.937282			0.984349			1	1.02
74.32	0.915714			0.978514			1	0.99		0.932301	0.920166	0.896367	1.04	1.04
75.33	0.901556			0.980999			0.99	1
76.32	0.909164			0.997159			1	1					1.02	1.04
77.29	0.925006			0.98363			1	1
78.28	0.904651			0.985178			1	1		0.913201	0.928357	0.891245	0.99	1.01
79.33	0.900894			0.977439			1	0.99
80.28	0.901289			0.999645			0.99	0.98					1.02	1
81.31	0.912645			0.969082			0.99	1
82.31	0.926029			0.985551			0.97	1.02		0.927328	0.946124	0.875521	1	1.01
83.32	0.904711			0.97855			0.99	0.99
84.32	0.896149			0.983639			0.99	1					0.93	1.06
85.31	0.913634			0.981054			1	1.01
86.3	0.905725			0.987281			1	0.99		0.938178	0.927204	0.88386	1.05	1.03
87.28	0.910152			0.977421			1.01	1
88.33	0.903963			0.978896			0.99	1					1.02	1.02
89.33	0.911536			0.970839			0.99	1.01
90.33	0.904375			0.985087			0.97	1.02		0.911505	0.913936	0.891126	0.95	1.08
91.33	0.893054			0.970884			0.99	1
92.31	0.895728			0.992371			0.98	1.01					0.96	1.03
93.31	0.892942			0.979542			0.99	1.01
94.29	0.889891			0.991014			1	1.01		0.907098	0.903092	0.882549	0.99	1.1
95.33	0.897834			0.985506			1	0.99
96.28	0.900438			0.972696			1.01	1					0.99	1.05
97.32	0.882653			0.993445			1	1
98.32	0.898848			0.982847			1.01	1.02		0.905402	0.920858	0.872901	0.96	1.04
99.28	0.895736			0.972031			0.98	1
100.31	0.895014			0.977503			0.99	0.99					0.99	1.08
101.31	0.894043			0.979315			0.99	1.01
102.3	0.894			0.990085			0.99	1.01		0.918965	0.916244	0.898035	0.97	1.01
103.31	0.891387			0.970511			0.98	1.02
104.31	0.888876			0.990149			1	1					0.97	1.01
105.31	0.897903			0.975855			0.99	1.01
106.31	0.873713			0.981354			0.99	1		0.901447	0.903438	0.897439	0.95	1.07
107.31	0.894705			0.974881			0.99	0.99
108.31	0.869509			0.979524			0.99	1					1.03	1
109.31	0.885369			0.980699			0.98	1.01
110.31	0.888902			0.967889			1	1		0.9158	0.902169	0.898988	0.98	0.99
111.33	0.871349			0.994146			0.99	1.01
112.32	0.878862			0.993062			1.01	1					1.05	1
113.32	0.892599			0.990122			0.99	1
114.31	0.882326			0.98404			0.98	0.99		0.893874	0.904938	0.884693	0.99	1.04
115.32	0.876223			0.990959			1	1
116.32	0.898083			0.970083			1.01	1.02					0.95	1.07
117.33	0.899201			0.981045			0.99	1
118.32	0.882687			0.973461			0.99	1.02		0.900543	0.899862	0.881239	0.95	0.95
119.33	0.883031			0.986571			0.99	1.01
120.32	0.864841			1.00156			1.02	1.02					1	0.97
121.32	0.886091			0.967279			1	0.99
122.29	0.882025			0.990094			0.98	1		0.897039	0.899977	0.876712	1	0.99
123.33	0.86399			0.977039			0.99	1.01
124.32	0.882404			0.973679			0.98	1.01					0.98	1.03
125.32	0.869243			0.982984			1	1
126.32	0.861661			0.985852			0.99	1		0.8941	0.894901	0.881001	0.98	0.99
127.32	0.869243			0.990896			0.99	1.02
128.32	0.868177			0.980981			0.98	1					0.95	1.05
129.32	0.864188			0.96574			1	1.01
130.33	0.877194			0.983685			1	1.01		0.906985	0.905284	0.89327	0.99	1.01
131.32	0.878191			0.98292			1	1.01
132.34	0.868589			0.998516			0.99	1.01					0.97	0.96
133.32	0.871718			0.981809			0.99	1.01
134.34	0.860689			0.982902			0.99	1		0.914331	0.905515	0.881239	0.95	1
135.33	0.862976			0.983284			0.99	1.01
136.32	0.899115			0.971494			0.98	0.99					0.99	1.02
137.32	0.870713			0.989348			0.99	1.01
138.33	0.852471			0.964739			0.98	1.01		0.895683	0.913821	0.888505	1	1.02
139.32	0.85285			0.983912			1	1.01
140.32	0.867584			0.985834			0.99	0.99					1	1.03
141.32	0.8504			0.956263			0.98	1.01
142.32	0.853778			0.98689			1	1.01		0.888336	0.899631	0.892198	0.96	1.02
143.32	0.861042			0.969			0.98	0.99
144.32	0.850701			0.981382			0.98	1					0.99	1.08
145.33	0.846893			0.98638			1.01	0.99
146.32	0.86228			0.985151			0.99	0.99		0.883251	0.905515	0.891245	0.99	1.04
147.31	0.871005			0.986881			1	1
148.29	0.855592			0.979187			1	0.99					0.96	1.06
149.33	0.861652			0.969874			0.97	1.02
150.33	0.856211			0.983667			0.98	1		0.897039	0.900785	0.876593	0.99	0.99
151.32	0.844047			1.00262			1	1.01
152.32	0.857655			0.967679			0.99	1					1.02	1.06
153.31	0.84697			0.990113			0.99	0.99
154.3	0.854182			0.991669			0.99	1		0.918739	0.894785	0.874806	0.95	1.1
155.33	0.851766			0.991506			1	1.01
156.33	0.854449			0.981063			0.99	1					1.01	1.05
157.33	0.841786			0.977093			0.99	0.98
158.34	0.851414			0.981409			0.99	0.99		0.890032	0.898823	0.882073	0.98	0.99
159.34	0.843523			0.973843			0.98	1.01
160.32	0.840729			0.972359			0.99	1					0.98	0.96
161.32	0.852772			0.98719			1	0.99
162.31	0.843144			0.989166			0.99	0.99		0.90868	0.914052	0.860036	1	0.98
163.34	0.840368			0.983885			0.99	1.01
164.31	0.843875			0.975254			1	1.02					0.98	0.99
165.34	0.849643			0.986179			0.99	1.01
166.29	0.862374			0.980717			0.99	0.99		0.887884	0.898593	0.871233	1	1
167.31	0.837325			0.982865			0.99	0.99
168.31	0.835967			0.972769			1	1.01					1	0.96
169.32	0.840016			0.984313			0.98	1
170.33	0.849987			0.970575			0.99	1.01		0.904159	0.902746	0.862418	1	1
171.33	0.854234			0.986826			0.99	1.02
172.33	0.839783			0.966532			1	1					0.94	0.98
173.32	0.851062			1.00109			0.97	1
174.33	0.840781			0.994574			1	1.01		0.900882	0.875173	0.874806	1.02	1.01
175.33	0.845921			0.981727			0.99	1
176.33	0.850374			0.964802			0.98	1.01					0.95	0.99
177.34	0.843454			0.976265			1.01	1
178.32	0.842139			0.989448			1.02	1		0.904498	0.899516	0.874806	0.99	0.98
179.32	0.845173			0.97336			0.98	1.01
180.32	0.845964			0.974999			0.99	1.02					0.9	1.04
181.32	0.841073			0.977357			0.98	1
182.32	0.841073			1.00039			1	1		0.895005	0.890863	0.853127	0.93	1
185.54	0.829391			0.970529			0.99	1
186.56	0.835442			0.990795			0.99	1					1	0.97
187.56	0.855532			1.00296			1	0.99
188.6	0.835606			1.00328			0.99	0.99		0.888449	0.891671	0.870637	1	1.06
189.63	0.842474			0.987117			0.99	1
190.64	0.831875			0.999973			1	1					1.02	1.01
191.68	0.829416			0.993463			1	0.99
192.69	0.821172			0.970438			0.99	0.99		0.870705	0.90713	0.866587	0.97	0.99
193.73	0.853116			0.993472			0.99	0.99
194.75	0.827259			0.988738			0.99	0.99					0.97	1.02
195.77	0.827998			0.984787			0.99	0.97
196.81	0.829691			0.981427			0.99	1.01		0.902012	0.898477	0.876951	0.93	1
197.83	0.829709			0.973707			0.99	0.99
198.85	0.825961			0.997296			1	1.02					0.97	1.02
199.84	0.823829			0.976647			1	1.01
200.84	0.814244			0.994155			1.01	1		0.879634	0.916936	0.848958	0.96	1.01
201.84	0.817278			0.986808			0.99	1
202.84	0.827284			1.00979			1	0.99					1.01	1
203.84	0.829021			0.979952			1	1.01
204.84	0.826004			0.99085			0.99	1		0.85816	0.899285	0.866349	0.93	1.03
205.84	0.826519			0.98363			1	1
206.85	0.825875			0.982474			0.98	0.99					0.97	1.04
207.84	0.819771			0.983312			1	0.99
208.85	0.829356			0.985397			0.98	1.01		0.880651	0.865021	0.868612	0.97	1.01
209.84	0.814657			0.985788			0.97	1
210.82	0.819049			0.973697			0.99	0.99					0.95	1.01
211.81	0.837643			1.00036			0.97	1
212.84	0.825574			0.984641			0.99	1		0.885511	0.895132	0.869446	0.98	1.02
213.84	0.836895			0.977722			1	0.99
214.85	0.824878			0.977712			0.99	1					1	1.02
215.85	0.832356			1.00359			1	1
216.8	0.827981			0.986116			1	0.98		0.865054	0.9024	0.875164	0.97	1.05
217.82	0.813891			1.00398			0.99	1.01
218.84	0.820734			0.976274			0.98	1.01					0.95	1.02
219.84	0.814519			0.992707			1.01	1.02
220.84	0.813513			1.00108			1.01	1.01		0.895005	0.902861	0.866349	0.94	1.03
221.84	0.823201			0.987955			0.98	0.99
222.85	0.821748			0.982492			0.98	1					0.95	1.07
223.82	0.802175			0.994883			0.99	1.01
224.84	0.806318			0.977858			0.99	1.01		0.885737	0.880134	0.856581	0.95	1.02
225.82	0.80312			1			1	1
226.83	0.830293			0.973078			0.99	0.98					1.02	0.99
227.83	0.820433			0.979524			0.98	1
228.83	0.823201			0.988774			1	0.98		0.888788	0.892247	0.846933	0.94	1.01
229.85	0.815843			1.0121			0.99	1
230.84	0.810754			0.979661			0.98	1					1.01	1.03
231.83	0.825213			0.987563			1.01	0.98
232.83	0.80698			0.992735			0.99	1		0.880877	0.915782	0.86349	0.95	0.99
233.86	0.818619			0.991287			1	1
234.86	0.809422			0.94755			0.99	0.99					0.91	0.96
235.83	0.795693			0.980653			0.97	1
236.84	0.808717			0.993044			0.99	0.99		0.88212	0.88348	0.867421	0.95	1.1
237.84	0.803576			0.982501			0.98	1
238.84	0.807298			0.988264			0.98	0.99					0.96	1.01
239.84	0.810788			0.980726			0.99	1.01
240.84	0.820708			0.984969			0.99	1.01		0.892066	0.904707	0.859678	0.92	1.02
241.84	0.812164			1.00104			0.99	1.01
242.83	0.811476			0.977731			0.99	0.99					0.93	0.98
243.83	0.805192			1.00656			1	0.99
244.83	0.824173			0.989421			0.99	0.99		0.866637	0.891209	0.872781	0.98	1.03
245.81	0.806292			0.984213			0.98	1.01
246.82	0.791507			0.999936			1	1					0.9	0.97
247.82	0.820382			0.996304			1	1.01
248.82	0.805992			0.981482			1	1		0.89071	0.885441	0.866349	0.95	1.03
249.85	0.78745			0.985123			0.99	1
250.86	0.814433			1.00129			0.98	1					0.92	0.95
251.85	0.807358			0.983949			0.97	1.01
252.85	0.813866			0.994446			1	1		0.856578	0.888094	0.861584	0.98	0.98
253.85	0.791172			0.972987			0.99	0.99
254.84	0.795238			0.981718			0.98	1					0.95	0.96
255.85	0.808674			0.980635			0.99	1.01
256.85	0.786401			0.985032			1	1.01		0.875791	0.893632	0.869684	1.01	1.03
257.84	0.796639			0.992762			0.98	0.99
258.83	0.794911			0.989066			0.99	0.99					0.97	0.93
259.83	0.78224			0.985779			0.99	1
260.83	0.81494			0.984686			0.99	0.98		0.877826	0.886018	0.866826	1.01	0.94
261.83	0.787759			1.01377			0.98	1.01
262.83	0.799398			0.973743			0.99	1.01					0.94	0.94
263.83	0.810805			0.990131			0.99	0.98
264.84	0.798264			0.998989			0.98	1		0.900203	0.863752	0.857296	0.93	0.93
265.84	0.801444			0.997169			1	1.01
266.84	0.80012			1.0069			0.98	1.01					0.98	1.02
267.84	0.80037			0.980052			0.99	1
268.86	0.800077			1.01167			0.99	0.98		0.896813	0.870905	0.853723	0.97	1.02
269.84	0.802269			0.992325			1	0.99
270.81	0.78947			0.994437			1	1					0.96	0.97
271.83	0.801874			0.997433			0.98	1
272.83	0.802536			0.983275			0.98	0.99		0.890145	0.88198	0.857177	1	0.96
273.84	0.790527			0.992234			1	0.98
274.83	0.796072			0.974417			0.99	1					0.96	0.96
275.84	0.802476			0.987136			0.98	1.01
276.82	0.803			0.992034			1	0.99		0.876243	0.869636	0.839786	0.96	0.98
277.81	0.807006			0.991296			0.99	0.98
278.85	0.789831			0.990868			0.99	1.01					0.96	0.97
279.85	0.783934			0.981773			0.99	0.99
280.85	0.792599			0.984259			0.99	1.01		0.888902	0.877365	0.86087	0.96	1.01
281.86	0.785335			0.984368			0.99	1.02
282.83	0.778759			0.980162			0.98	0.99					0.96	0.95
283.83	0.810058			0.979634			1	1.01
284.84	0.786022			0.997387			1	0.99		0.892066	0.884056	0.869803	0.93	0.97
285.84	0.796003			0.984349			1.01	0.99
286.82	0.79216			0.986325			1	0.99					0.96	0.99
287.84	0.790862			1.00066			0.99	0.99
288.81	0.78849			0.980671			0.97	0.98		0.884042	0.859252	0.866945	0.97	0.98
289.86	0.787441			0.981482			0.99	0.99
290.84	0.781166			1.00312			1	0.98					0.98	1
291.83	0.789401			0.998844			1	1.01
292.86	0.780598			0.993745			1	1		0.869236	0.882672	0.87564	0.95	1.04
293.86	0.772337			0.978395			0.97	0.99
294.86	0.783323			0.977093			1	0.98					0.95	0.92
295.85	0.785068			1.0032			1	1
296.85	0.779025			0.989457			1.01	1		0.879069	0.882326	0.849792	0.91	0.95
297.86	0.792599			0.987254			0.98	1
298.84	0.793871			0.980507			0.98	1.02					1	0.99
299.85	0.80398			0.98099			1.01	0.99
300.84	0.789977			1.00001			1	0.99		0.86788	0.892132	0.850149	0.96	1.01
301.84	0.775054			0.977749			0.99	0.98
302.84	0.798762			0.985442			0.99	1					0.97	1.02
303.85	0.780581			0.972341			0.99	1
304.85	0.774675			0.996012			0.98	1.01		0.875452	0.871597	0.835021	1.02	0.95
305.85	0.781802			0.963819			0.98	0.99
306.85	0.790561			0.971148			1	1.01					0.91	1
307.86	0.779507			0.983494			0.98	1.01
308.85	0.779085			0.969455			0.99	0.99		0.872175	0.859599	0.833115	0.9	0.95
309.85	0.789177			0.980708			0.97	1
310.86	0.766131			0.977767			0.97	1.01					0.95	1.01
311.84	0.778028			0.993108			0.97	1.01
312.82	0.78849			0.982137			0.99	1		0.900995	0.872058	0.864086	0.95	1.01
313.82	0.769544			0.988683			0.99	1
314.84	0.77465			0.983858			0.99	0.99					0.91	1
315.85	0.790828			0.976228			0.98	0.99
316.85	0.789427			0.980298			0.99	1		0.85929	0.880595	0.845503	0.99	0.99
317.84	0.787965			0.981454			0.98	1
318.83	0.775372			0.962108			0.98	1					0.87	1.02
319.82	0.782232			0.988547			1	0.99
320.85	0.777065			0.969018			0.97	0.99		0.875452	0.872635	0.868851	0.93	0.98
321.85	0.783272			0.972013			0.99	1
322.85	0.777839			1.00549			0.98	0.99					1.01	0.97
323.86	0.786762			0.980216			0.99	0.99
324.84	0.778363			0.991952			1	1		0.851492	0.881057	0.858606	0.91	0.92
325.85	0.786057			0.963555			0.97	0.98
326.86	0.795693			0.980599			0.99	0.99					0.97	1.01
327.86	0.775423			0.975309			1	0.97
328.83	0.766337			0.975955			0.99	0.99		0.867202	0.888786	0.851221	1	1.01
329.82	0.772217			0.973779			0.99	0.99
330.86	0.796097			0.972368			0.97	1					0.94	0.96
331.83	0.772681			0.986817			0.99	0.97
332.87	0.774349			0.971922			0.99	1.01		0.862229	0.873558	0.830256	0.94	1.04
333.84	0.792152			1.00691			1	0.99
334.84	0.769114			0.988692			0.99	0.99					0.94	0.95
335.84	0.780813			0.960332			1	1
336.82	0.778088			0.983649			0.99	0.98		0.86901	0.902054	0.822275	0.95	1
337.87	0.780194			0.987236			1	1.02
338.82	0.767816			0.963164			0.99	0.99					0.99	0.93
339.87	0.765357			0.969364			0.97	1.01
340.82	0.766105			0.976647			0.98	0.98		0.858273	0.853023	0.837403	0.88	0.93
341.84	0.769131			0.994537			0.99	0.99
342.84	0.761618			0.978486			0.99	1					0.94	1
343.84	0.765374			0.977457			0.98	1
344.85	0.768048			0.970884			1	1.01		0.861664	0.888786	0.835616	0.9	0.94
345.85	0.776739			0.957655			0.99	0.99
346.85	0.778123			0.989002			0.99	1					0.95	1
347.85	0.760595			0.984996			1	1.01
348.85	0.771555			1.00004			0.99	1		0.887884	0.884287	0.848124	0.99	0.94
349.85	0.766818			0.99187			1	0.99
350.85	0.769939			0.980371			0.99	0.99					0.92	0.99
351.86	0.774555			0.975491			0.99	0.99
352.84	0.777813			0.980344			0.98	1		0.881216	0.868597	0.832639	0.94	1
353.83	0.773644			0.994146			1	0.99
354.82	0.763715			1.00123			0.99	1.01					0.98	0.95
355.87	0.776403			0.978523			0.99	1
356.83	0.796587			0.990113			0.98	1.02		0.862229	0.872174	0.808934	0.99	0.95
357.85	0.767498			0.977849			0.98	1
358.87	0.781819			0.975828			0.99	1					0.95	0.99
359.86	0.763328			0.982911			0.99	0.98
360.85	0.755102			0.973379			1	0.99		0.882233	0.858791	0.836331	0.99	0.97
361.86	0.773627			0.974826			0.99	0.99
362.86	0.766337			0.966387			1	0.99					0.93	1.01
363.87	0.769896			0.992006			0.97	1.02
364.85	0.76393			0.992061			0.99	0.98		0.871044	0.861791	0.833591	0.96	1
368	0.773618			0.984004			0.98	1
369.02	0.766114			0.973843			0.98	0.99					0.94	0.97
370.02	0.779997			0.973807			0.99	0.99
371.07	0.758111			0.980908			0.99	0.98		0.862003	0.874366	0.845622	0.93	0.96
372.08	0.774615			0.972842			0.98	0.99
373.11	0.761893			0.979624			0.99	0.99					0.9	0.96
374.11	0.754638			0.982501			1	0.97
375.16	0.757096			0.986662			0.98	1		0.87014	0.87275	0.845265	0.89	0.95
376.18	0.773953			0.983749			0.99	1
377.21	0.778209			0.98313			1	1					0.95	0.98
378.24	0.782257			0.986917			0.99	0.98
379.26	0.769458			0.978231			0.98	0.99		0.852509	0.87748	0.837761	0.92	0.97
380.27	0.771392			0.982319			1	0.98
381.31	0.768383			0.979278			0.99	0.99					0.97	1.04
382.31	0.769372			0.976902			0.99	1.01
383.32	0.762838			0.989885			0.99	1.01		0.858612	0.867905	0.856581	0.92	0.96
384.3	0.759529			0.985269			1	0.98
385.29	0.762907			0.975354			1	1					0.94	1.03
386.3	0.76154			0.999099			1	0.99
387.31	0.77906			0.976747			0.98	0.99		0.862568	0.852677	0.840024	0.98	0.95
388.28	0.772776			0.979752			0.98	0.99
389.27	0.774564			0.976055			0.99	0.99					0.93	0.96
390.32	0.76571			0.989839			0.99	0.98
391.31	0.775208			0.967279			1	1		0.867767	0.881172	0.820846	0.93	0.97
392.32	0.767764			0.970975			0.98	1
393.31	0.777736			0.997305			1	0.99					0.98	0.95
394.32	0.758781			0.983694			0.98	0.99
395.31	0.770747			0.970629			0.97	1.01		0.854656	0.851177	0.837046	0.95	0.96
396.31	0.77906			0.975691			0.98	0.97
397.31	0.771478			0.978623			0.99	0.99					0.93	1.01
398.31	0.762563			0.997542			0.99	0.98
399.32	0.767635			1.00344			1	1		0.861438	0.851061	0.854437	0.97	0.94
400.31	0.76289			0.983985			0.99	1
401.31	0.763595			0.978341			1	1					0.96	1
402.3	0.757741			0.967315			0.98	0.97
403.28	0.756761			0.985488			0.99	1		0.854543	0.862021	0.858725	0.92	1.02
404.32	0.759168			0.977876			0.99	0.98
405.32	0.77563			0.961051			0.97	0.98					1.01	0.93
406.31	0.76889			0.988192			0.99	0.96
407.31	0.75848			0.977831			0.99	1		0.863698	0.865367	0.81763	0.92	0.99
408.31	0.770738			0.993882			0.98	1
409.31	0.759185			0.981227			1	0.98					0.93	0.98
410.32	0.750838			0.982902			1.01	0.98
411.3	0.755996			0.993663			0.99	1		0.876921	0.873327	0.850864	0.92	0.99
412.27	0.762297			0.985287			1.01	0.99
413.32	0.767747			0.999718			0.98	1					0.88	0.95
414.31	0.753976			0.969091			0.99	1
415.31	0.773644			0.968062			0.98	0.98		0.848779	0.865021	0.826683	0.93	0.99
416.3	0.771228			0.972477			1	0.97
417.31	0.7632			0.987427			1	0.99					0.89	0.95
418.3	0.773661			0.988019			0.98	1.01
419.3	0.742233			0.97347			1.01	1.01		0.862794	0.837564	0.838475	0.88	1.01
420.3	0.760131			0.96808			0.99	0.99
421.32	0.757698			0.96625			0.99	0.99					0.9	0.99
422.27	0.767738			0.977585			0.98	0.99
423.31	0.75352			0.957537			0.99	0.99		0.839964	0.853023	0.826683	0.98	0.9
424.31	0.748801			0.990941			1	1
425.32	0.76528			0.978332			0.98	1					0.91	0.98
426.3	0.756391			0.986935			0.98	0.99
427.28	0.756374			0.989184			0.98	0.99		0.863811	0.865136	0.833115	0.92	0.92
428.3	0.749437			0.978259			0.99	0.99
429.3	0.746686			0.966541			1	0.98					0.92	0.96
430.29	0.757053			0.987017			1	1
431.31	0.74868			1.0027			1	0.98		0.842337	0.830411	0.838833	0.95	0.98
432.31	0.749119			0.97469			0.99	0.98
433.3	0.744288			0.976383			1	1.02					0.91	0.93
434.32	0.754621			0.968781			0.97	1
435.32	0.766285			0.970265			0.98	0.99		0.848101	0.844947	0.840143	0.94	0.96
436.29	0.762228			0.973169			1	0.98
437.31	0.750236			0.977066			0.98	1					0.93	0.94
438.31	0.744013			0.977949			0.99	0.99
439.31	0.766801			0.987818			0.99	1		0.840868	0.8506	0.827516	0.89	0.98
440.31	0.75432			0.981172			1	0.99
441.31	0.753589			0.986589			0.98	0.99					0.91	0.98
442.32	0.76222			0.981081			1	0.98
443.31	0.763853			0.974599			0.98	0.98		0.877147	0.83964	0.846695	0.93	0.94
444.31	0.762228			0.976456			1	0.99
445.31	0.745027			0.981864			1.01	1					0.92	0.98
446.31	0.768469			0.978887			1.02	1
447.3	0.75187			0.972487			0.98	1		0.859742	0.853023	0.840858	0.92	0.95
448.32	0.759735			0.9877			1	0.99
449.29	0.739199			0.987072			1.01	0.98					0.96	1.03
450.29	0.763243			0.980799			0.99	0.98
451.28	0.753185			0.987318			0.99	1		0.846745	0.836179	0.84324	0.95	0.96
452.32	0.736465			0.957428			1	1
453.27	0.743634			0.978286			0.99	1					0.9	0.97
454.32	0.740256			0.985852			0.99	1
455.32	0.755678			0.997196			0.99	0.98		0.837251	0.84264	0.84598	0.91	0.9
456.32	0.748448			0.986689			0.99	0.98
457.32	0.756099			0.988802			0.99	0.99					0.94	0.91
458.33	0.753933			0.983357			0.99	1
459.31	0.745001			0.972113			0.98	1		0.851379	0.854522	0.837642	0.92	0.97
460.31	0.749403			0.967078			0.99	1
461.31	0.767283			0.970292			0.98	0.98					1	0.9
462.28	0.749781			0.974981			0.99	0.99
463.3	0.753649			0.971658			0.99	0.99		0.848101	0.852792	0.829303	0.96	0.9
464.3	0.739878			0.976447			0.98	0.98
465.28	0.735313			0.993135			0.99	0.98					0.9	0.93
466.3	0.763913			1.003			1.01	0.98
467.3	0.735391			0.997906			0.98	1		0.855222	0.855676	0.829661	0.91	0.93
468.31	0.740901			0.986334			1	1
469.29	0.749042			0.958238			0.98	0.99					0.89	0.95
470.32	0.741786			0.963036			0.98	1.01
471.31	0.736078			0.960032			0.99	0.98		0.846858	0.842986	0.858249	0.89	0.96
472.31	0.753615			0.984095			0.99	0.98
473.29	0.740935			0.989903			0.97	0.99					0.85	0.96
474.32	0.738932			0.975682			0.98	0.98
475.32	0.739165			0.971267			0.99	0.98		0.838382	0.872866	0.840262	0.93	0.95
476.32	0.741262			1.00159			0.99	0.98
477.31	0.752953			0.978295			0.99	0.99					0.93	0.94
478.31	0.750881			0.997096			0.99	0.98
479.29	0.751569			0.952785			0.99	0.99		0.851153	0.853715	0.84193	0.87	1
480.33	0.74807			0.968735			0.98	1
481.33	0.73129			0.992061			0.97	0.99					0.97	0.99
482.32	0.734694			0.966997			0.99	1.01
483.32	0.74703			0.99421			0.98	1		0.838156	0.85706	0.815485	0.92	0.92
484.32	0.74813			0.971412			0.99	0.98
485.33	0.738124			0.977885			0.99	0.99					0.87	0.98
486.28	0.740832			0.959713			1	0.99
487.31	0.757131			0.978268			0.99	1.01		0.86042	0.862598	0.793091	0.89	0.93
488.31	0.739783			0.97784			1	0.99
489.31	0.752549			0.986544			0.98	1					0.86	0.91
490.29	0.75499			0.962535			0.98	0.98
491.34	0.735692			0.974954			0.99	1		0.821881	0.864213	0.832758	0.92	0.99
492.31	0.749205			0.962017			0.98	0.99
493.34	0.75089			0.961261			1	0.98					0.88	0.96
494.3	0.746764			0.979342			1	0.99
495.29	0.721585			0.95975			0.98	0.99		0.853752	0.853023	0.799285	0.99	0.99
496.28	0.745973			0.987418			1	1
497.28	0.751182			0.978231			1	0.99					0.95	1.01
498.31	0.739156			0.981263			0.98	0.98
499.31	0.738803			0.983749			0.99	0.99		0.834087	0.834679	0.825372	0.9	0.97
500.32	0.733766			0.979051			0.98	0.98
501.31	0.753555			0.987017			0.98	0.99					0.88	0.99
502.34	0.745044			0.966241			0.97	0.99
503.3	0.743918			0.982429			1	1.01		0.846406	0.864213	0.823466	0.94	1.03
504.31	0.749497			0.981254			0.99	0.97
505.29	0.736061			0.968754			0.98	0.98					0.9	0.95
506.28	0.734772			0.972769			1	0.99
507.29	0.734677			0.975045			0.98	1		0.853526	0.860983	0.819655	0.91	0.94
508.32	0.732623			1.00703			0.98	0.99
509.32	0.732279			0.982665			1.01	1					0.95	0.98
510.32	0.736482			0.985934			1	0.99
511.32	0.73472			0.986298			1.01	0.99		0.875339	0.840217	0.812984	0.98	0.96
512.33	0.74299			0.979661			1	0.99
513.33	0.741915			0.978067			0.99	0.99					0.88	0.96
514.32	0.748775			0.975673			0.98	0.99
515.32	0.72927			0.988055			1	0.99		0.841659	0.841832	0.812388	0.89	0.96
516.28	0.727207			0.977539			1	0.97
517.33	0.738812			0.967998			0.99	1					0.93	0.94
518.33	0.73233			0.973634			0.99	0.99
519.32	0.743256			0.969874			0.99	0.99		0.842563	0.847139	0.818583	0.89	0.94
520.32	0.728221			0.974599			0.99	0.99
521.31	0.743256			0.987736			0.99	0.99					0.94	0.9
522.28	0.732322			0.969182			0.99	1.01
523.33	0.739165			0.974945			0.98	1		0.851831	0.834333	0.83109	0.91	0.87
524.34	0.741898			0.990987			0.98	0.99
525.33	0.745723			0.994374			0.97	1					0.91	0.94
526.32	0.734385			0.978605			0.98	1
527.33	0.729881			0.972887			0.97	0.99		0.850814	0.840102	0.807385	0.93	0.95
528.33	0.738219			0.964438			0.98	0.98
529.29	0.738202			0.968435			0.99	0.98					0.95	0.94
530.32	0.725024			0.958247			0.99	0.99
531.31	0.725075			0.975318			0.99	0.99		0.824819	0.829372	0.819059	0.91	0.93
532.3	0.736113			0.94663			0.99	1
533.28	0.74464			0.976101			0.98	1					0.89	0.94
534.33	0.740222			0.976137			1	0.99
535.28	0.751113			0.96594			0.98	0.99		0.828888	0.842524	0.80548	0.89	0.94
536.33	0.747193			0.976847			1	0.97
537.32	0.732047			0.984085			0.98	0.99					0.95	1.02
538.32	0.758377			0.998343			0.98	0.98
539.32	0.730465			0.995721			0.99	0.99		0.841094	0.829142	0.812746	0.91	0.98
540.32	0.731591			0.982629			0.98	1
541.3	0.733027			0.968763			1	0.98					0.9	1
542.29	0.738193			0.981127			0.99	1.01
543.3	0.738417			0.988173			1	0.98		0.835782	0.834218	0.81894	0.91	0.94
544.31	0.727052			0.983421			1	0.99
545.32	0.732373			0.992489			0.97	1					0.96	0.98
546.33	0.731316			0.995785			0.99	0.98
547.33	0.740334			0.976292			0.99	0.98		0.817247	0.861675	0.804884	0.93	1
550.57	0.737832			0.970329			0.97	1.01
551.58	0.72241			0.966869			0.98	0.99					0.91	0.96
552.61	0.733388			0.977439			1	0.99
553.62	0.7259			0.972141			0.99	0.99		0.857821	0.842409	0.82025	0.88	0.96
554.63	0.735907			0.977212			0.98	0.98
555.67	0.739259			0.962599			0.97	1					0.94	0.91
556.7	0.741228			0.970156			0.98	0.97
557.73	0.741047			0.979342			1.01	0.99		0.83906	0.832372	0.817868	0.92	0.95
558.76	0.721405			0.96554			0.98	0.99
559.75	0.715147			0.977603			0.97	0.98					0.91	0.96
560.81	0.72137			0.969063			0.98	0.99
561.81	0.720021			0.96523			0.97	1		0.835217	0.848754	0.803574	0.92	1.01
562.87	0.725496			0.959713			0.98	0.99
563.88	0.72933			0.99055			0.98	1					0.93	0.94
564.87	0.736216			0.965367			0.98	0.98
565.85	0.728961			0.967889			0.98	1		0.840529	0.82718	0.817987	0.9	0.95
566.89	0.728591			0.976747			1	0.98
567.87	0.745869			0.982547			0.99	0.99					0.92	0.92
568.86	0.7286			0.976665			1	0.98
569.88	0.737505			0.973461			0.99	0.98		0.819394	0.84264	0.822394	0.96	0.96
570.89	0.723175			0.987664			0.98	0.97
571.87	0.721766			0.979697			0.98	0.99					0.91	0.97
572.87	0.73025			0.9629			0.98	0.97
573.89	0.71941			0.978559			0.99	0.98		0.83307	0.852677	0.817272	0.9	0.94
574.89	0.740591			0.964056			1	0.99
575.89	0.730706			0.982328			1	0.98					0.95	0.96
576.89	0.72309			0.983366			0.98	1
577.9	0.720966			0.95679			0.98	0.99		0.841659	0.830411	0.807862	0.9	0.99
578.89	0.728307			0.973442			1	0.99
579.88	0.721044			0.973615			0.99	0.99					0.89	0.97
580.88	0.718284			0.95273			1	1
581.9	0.740273			0.975045			0.99	1		0.812387	0.840909	0.797856	0.92	0.98
582.85	0.745689			0.975682			0.98	0.98
583.89	0.728239			0.962991			0.98	0.99					0.95	0.96
584.89	0.736938			0.959322			0.97	0.98
585.89	0.723915			0.964056			0.99	0.99		0.856804	0.841832	0.829541	0.85	0.96
586.89	0.716599			0.955316			0.98	1
587.89	0.726554			0.967998			0.97	0.98					0.93	0.89
588.89	0.713161			0.970229			0.98	0.98
589.88	0.726829			0.980708			0.98	0.98		0.843128	0.824066	0.841453	0.93	0.98
590.88	0.725135			0.968353			0.99	0.98
591.88	0.716505			0.990987			0.97	0.99					0.93	0.94
592.89	0.705502			0.956099			0.98	0.99
593.88	0.717235			0.968062			0.99	0.97		0.845276	0.858906	0.812627	0.89	0.93
594.86	0.704169			0.946129			0.99	0.99
595.87	0.719651			0.971722			0.99	0.98					0.97	0.99
596.88	0.723107			0.973433			0.99	0.99
597.89	0.733414			0.984878			0.98	0.99		0.809675	0.830411	0.810959	0.96	0.9
598.88	0.71482			0.976119			0.99	0.99
599.87	0.724542			0.982183			0.98	0.97					0.88	0.95
600.86	0.718293			0.966478			0.99	0.99
601.9	0.728686			0.966159			0.99	1		0.831374	0.845408	0.8324	0.92	0.94
602.9	0.723021			0.96839			0.99	0.99
603.89	0.709361			0.973151			1.01	1					0.88	0.92
604.85	0.728342			0.999691			0.97	0.98
605.89	0.718671			0.985214			0.98	0.99		0.834539	0.835372	0.817987	0.94	1.07
606.89	0.711029			0.98485			0.98	0.99
607.89	0.715877			0.963027			1	0.98					0.91	0.95
608.9	0.717072			0.969509			0.96	0.99
609.89	0.716256			0.982583			0.98	1		0.832731	0.828219	0.802859	0.9	0.94
610.89	0.731264			0.972778			0.97	1
611.89	0.727233			0.968654			0.98	0.98					0.9	0.92
612.9	0.70937			0.969518			0.99	0.98
613.9	0.713814			0.976784			0.96	0.98		0.830131	0.848408	0.807028	0.91	1.03
614.9	0.721327			0.981782			0.97	0.97
615.89	0.72413			0.979688			0.97	0.98					0.93	0.93
616.89	0.722118			0.963009			0.97	1
617.89	0.700438			0.967197			0.98	1		0.850362	0.846908	0.831924	0.94	0.94
618.9	0.715937			0.974298			0.96	0.99
619.9	0.712783			0.964775			0.98	0.99					0.85	0.98
620.9	0.719015			0.964283			0.97	1
621.88	0.736534			0.977457			0.99	0.98		0.835895	0.835487	0.808934	0.92	0.94
622.88	0.730336			0.967333			0.98	0.99
623.89	0.728307			0.970229			0.97	0.99					0.98	0.92
624.9	0.714485			0.976101			0.98	0.98
625.88	0.7256			0.982911			0.98	0.98		0.82335	0.81449	0.812269	0.91	0.97
626.89	0.707419			0.968808			0.97	1
627.89	0.712808			0.964438			0.97	0.99					0.94	0.96
628.89	0.725849			0.968116			1	0.99
629.9	0.707221			0.965449			0.97	0.98		0.817247	0.818874	0.806552	0.81	0.95
630.89	0.708914			0.981882			1.01	1
631.9	0.71549			0.975618			0.97	1					0.91	0.98
632.88	0.718619			0.984322			1	0.99
633.88	0.716995			0.96371			0.99	0.99		0.802893	0.82868	0.80536	0.92	0.95
634.88	0.715903			0.971612			0.99	0.99
635.86	0.712912			0.950854			0.98	0.99					0.91	0.96
636.9	0.73025			0.97641			0.98	0.98
637.9	0.71525			0.966614			1	0.98		0.827306	0.837794	0.815485	0.92	1.02
638.9	0.724877			0.979998			0.98	0.99
639.9	0.725264			0.952065			0.97	0.99					0.92	0.98
640.9	0.718276			0.9695			0.96	0.98
641.9	0.718301			0.954942			0.99	1		0.819281	0.829488	0.798809	0.98	0.95
642.9	0.714175			0.935058			0.97	0.99
643.87	0.723812			0.951337			0.98	1					0.84	0.93
644.9	0.71868			0.96838			0.97	0.99
645.87	0.71035			0.957546			0.97	0.98		0.82561	0.814259	0.79464	0.94	0.97
646.88	0.715121			0.959322			0.98	0.97
647.9	0.713806			0.966987			0.97	0.99					0.88	0.98
648.88	0.707934			0.964902			0.98	0.98
649.86	0.722737			0.955998			0.96	0.98		0.836799	0.826142	0.782966	0.87	0.94
650.89	0.717915			0.966541			0.99	0.99
651.9	0.716204			0.989229			0.99	1					0.9	0.92
652.89	0.709327			0.960013			0.97	0.98
653.89	0.722118			0.956772			0.96	0.98		0.825949	0.832718	0.788088	0.93	0.95
654.89	0.70735			0.966305			0.97	0.99
655.89	0.72272			0.955662			0.99	0.99					0.92	0.87
656.89	0.713092			0.963673			0.97	1
657.89	0.702433			0.970465			0.97	0.99		0.8151	0.822335	0.813341	0.94	0.91
658.89	0.709404			0.966168			0.98	0.98
659.86	0.731394			0.969482			0.98	0.99					0.96	0.97
660.91	0.69498			0.960287			0.97	1.01
661.91	0.712447			0.96218			0.95	0.99		0.837251	0.794762	0.828946	0.91	0.97
662.89	0.714889			0.975254			0.96	0.98
663.89	0.711914			0.959258			0.96	0.99					0.9	0.91
664.9	0.718293			0.953222			0.98	0.99
665.89	0.706026			0.981127			0.98	0.99		0.83906	0.823835	0.832996	0.93	0.94
666.89	0.710694			0.96544			1	0.98
667.89	0.709834			0.963145			0.97	0.98					0.9	0.95
668.9	0.710436			0.970948			0.99	0.98
669.9	0.720296			0.976101			0.98	0.96		0.821429	0.840563	0.815009	0.95	0.88
670.86	0.710711			0.976128			0.99	0.99
671.86	0.721061			0.955215			0.97	0.98					0.9	0.99
672.86	0.725299			0.984085			0.97	0.98
673.88	0.707969			0.967707			0.98	0.98		0.818377	0.838256	0.7919	0.92	0.9
674.88	0.719032			0.963346			0.98	1
675.89	0.699751			0.941031			0.97	0.98					0.92	0.95
676.89	0.715817			0.962954			0.97	0.99
677.89	0.7038			0.958102			0.98	0.98		0.814534	0.850254	0.809768	0.87	1.01
678.9	0.69706			0.958584			0.99	1.01
679.9	0.704874			0.963318			0.97	0.98					0.92	0.93
680.9	0.709026			0.966259			1	1
681.87	0.702149			0.9572			0.98	0.98		0.823576	0.836064	0.794044	0.9	0.95
682.9	0.717975			0.975327			0.99	1
683.91	0.704573			0.960023			0.98	0.99					0.9	0.89
684.91	0.696304			0.969482			0.97	0.97
685.87	0.726511			0.969491			0.99	0.97		0.862794	0.841255	0.809887	1.01	1.03
686.89	0.707951			0.973588			0.97	0.99
687.89	0.6921			0.969109			0.99	0.98					0.92	0.99
688.91	0.719341			0.974963			0.98	0.98
689.91	0.710445			0.955343			0.99	0.99		0.833974	0.843909	0.80274	0.94	0.91
690.88	0.711381			0.969801			0.98	0.99
691.89	0.710814			0.969864			0.99	0.98					0.95	0.98
692.88	0.712877			0.977184			0.97	0.98
693.88	0.705957			0.964028			0.99	0.97		0.829792	0.827873	0.803812	0.88	0.99
694.88	0.703181			0.967652			0.98	0.97
695.88	0.706292			0.969418			0.97	1.01					0.91	0.93
696.88	0.698633			0.956727			0.98	1
697.9	0.704229			0.959695			0.99	0.99		0.845841	0.830295	0.807385	0.92	0.94
698.9	0.717287			0.956408			0.98	0.98
699.9	0.699415			0.973479			0.97	0.98					0.89	0.9
700.9	0.705897			0.973534			0.97	0.99
701.9	0.719006			0.959294			0.99	0.98		0.843015	0.818643	0.80679	0.9	0.93
702.9	0.707943			0.961843			0.97	0.99
703.9	0.717923			0.968535			0.97	0.98					0.93	0.96
704.91	0.719264			0.961543			0.98	0.97
705.87	0.695281			0.953094			0.96	0.98		0.81623	0.826488	0.808815	0.85	0.95
706.91	0.695796			0.949507			0.96	1
707.89	0.696579			0.970256			0.99	0.99					0.95	0.95
708.89	0.703817			0.975983			0.98	0.98
709.89	0.713496			0.982456			0.97	0.98		0.807075	0.832833	0.798809	0.91	0.97
710.87	0.714201			0.968799			0.98	0.96
711.9	0.701848			0.940749			0.97	0.99					0.88	0.95
712.9	0.71084			0.962909			0.99	0.99
713.9	0.713917			0.961498			0.97	0.99		0.799051	0.821528	0.80536	0.9	0.97
714.9	0.696544			0.964848			0.99	0.96
715.91	0.702424			0.97286			0.98	0.97					0.92	0.9
716.9	0.711364			0.950499			0.98	0.97
717.9	0.708682			0.973133			0.98	0.99		0.831261	0.819682	0.806552	0.91	0.94
718.9	0.714846			0.96727			0.97	0.99
719.86	0.703602			0.966104			0.99	0.97					0.89	1.04
720.91	0.700438			0.960114			0.98	1
721.88	0.701117			0.975318			0.96	0.98		0.826175	0.831795	0.803097	0.87	0.95
722.9	0.708381			0.975673			0.98	0.98
723.9	0.68604			0.952411			0.98	0.99					0.85	0.93
724.9	0.703782			0.971658			0.98	0.99
725.9	0.704152			0.962563			0.98	0.98		0.824028	0.823489	0.797379	0.9	0.89
726.91	0.709026			0.974908			0.99	0.99
727.86	0.710419			0.964775			0.97	0.99					0.9	0.99
728.9	0.708012			0.966232			0.97	0.97
729.9	0.702845			0.975573			0.99	0.98		0.829453	0.807107	0.797379	0.88	0.99
732.92	0.694215			0.971594			0.98	0.99
733.95	0.697662			0.958857			0.98	0.99					0.91	0.95
734.99	0.689693			0.98434			0.98	0.98
735.98	0.696656			0.959558			0.98	0.97		0.824706	0.818067	0.810006	0.92	0.94
737.03	0.695968			0.978523			0.97	0.99
738.04	0.700627			0.982128			0.97	0.99					0.91	0.99
739.06	0.697387			0.965685			0.94	0.99
740.09	0.722058			0.947595			0.98	0.98		0.813065	0.793839	0.814771	0.89	0.95
741.11	0.687355			0.984732			0.98	0.99
742.13	0.714184			0.97449			0.97	0.98					0.92	0.95
743.17	0.705244			0.963546			0.98	0.98
744.18	0.70312			0.964302			0.99	0.99		0.804476	0.829026	0.807505	0.9	0.94
745.21	0.703928			0.95741			0.98	0.99
746.21	0.702218			0.976684			0.98	0.99					0.91	0.99
747.24	0.695624			0.959613			0.97	0.98
748.19	0.707333			0.987718			0.97	0.98		0.804137	0.842755	0.817272	0.87	0.97
749.24	0.712748			0.97916			0.98	0.97
750.24	0.709009			0.976702			0.96	0.96					0.91	0.94
751.22	0.703146			0.951874			0.96	0.97
752.23	0.700189			0.972405			0.97	0.98		0.809109	0.798685	0.780822	0.9	0.92
753.23	0.69945			0.960287			0.97	0.99
754.24	0.70698			0.968708			0.99	0.98					0.97	0.91
755.23	0.713651			0.956709			0.98	0.99
756.22	0.691464			0.982137			0.97	0.97		0.814987	0.829834	0.826563	0.91	0.93
757.23	0.695633			0.970848			0.98	0.98
758.23	0.706628			0.952976			0.97	0.99					0.89	0.87
759.24	0.702201			0.968025			0.97	0.98
760.23	0.705897			0.964311			0.98	1		0.826062	0.832603	0.800953	0.9	0.96
761.23	0.708691			0.976656			0.97	0.99
762.23	0.700172			0.97743			0.98	1					0.85	0.88
763.24	0.714562			0.974134			0.98	0.97
764.19	0.696286			0.964739			0.99	0.98		0.831261	0.829142	0.807862	0.89	0.97
765.19	0.698633			0.950554			0.99	0.97
766.24	0.693991			0.957055			0.97	0.98					0.92	0.93
767.23	0.680143			0.961079			0.96	0.99
768.23	0.713874			0.981727			0.98	1		0.823576	0.796031	0.788565	0.88	0.96
769.23	0.727972			0.955206			0.98	0.98
770.22	0.702183			0.972341			0.98	0.99					0.92	0.97
771.23	0.682086			0.982556			0.99	0.99
772.23	0.697292			0.967233			0.98	0.99		0.817812	0.81299	0.802859	0.92	0.95
773.22	0.704212			0.956718			0.97	0.98
774.23	0.692177			0.987254			0.97	0.98					0.95	0.99
775.23	0.70392			0.972013			0.97	1
776.23	0.684914			0.976329			0.96	0.99		0.816456	0.821528	0.787254	0.92	0.91
777.22	0.702373			0.966851			0.98	0.99
778.23	0.704418			0.961361			0.99	0.98					0.94	0.96
779.21	0.694963			0.958848			0.98	1
780.22	0.698711			0.981017			1	0.97		0.812839	0.818989	0.799881	0.92	0.95
781.2	0.7008			0.963209			0.98	0.98
782.23	0.703593			0.972222			0.97	0.99					0.94	0.92
783.23	0.687621			0.964994			0.98	0.99
784.23	0.700387			0.967206			0.99	0.99		0.821429	0.822104	0.796426	0.89	0.92
785.24	0.702398			0.963546			0.96	0.98
786.24	0.694636			0.963965			0.98	0.98					0.93	0.89
787.22	0.698057			0.979442			0.97	0.97
788.23	0.704238			0.970529			0.98	0.97		0.803458	0.826027	0.784991	0.9	0.94
789.23	0.69804			0.965458			0.97	0.98
790.22	0.689659			0.965767			0.98	0.99					0.9	0.96
791.22	0.688747			0.978213			0.96	0.97
792.22	0.707633			0.977048			0.97	0.97		0.801876	0.816105	0.797499	0.94	0.96
793.22	0.714889			0.976766			0.97	0.97
794.23	0.70282			0.974235			0.98	0.98					0.94	0.98
795.22	0.701427			0.954205			0.97	0.97
796.22	0.697619			0.967907			0.98	0.99		0.812613	0.814606	0.807266	0.89	0.94
797.22	0.689306			0.985415			0.98	0.99
798.21	0.697043			0.961379			0.97	1					0.9	0.94
799.22	0.691172			0.956308			0.97	0.96
800.22	0.691791			0.976656			0.98	0.99		0.788992	0.807337	0.790351	0.91	0.89
801.22	0.684217			0.968817			0.98	0.99
802.23	0.700928			0.969			0.98	0.99					0.92	0.95
803.23	0.68812			0.982674			0.97	0.98
804.23	0.6891			0.969455			0.97	0.98		0.81849	0.79234	0.793925	0.89	0.89
805.23	0.687312			0.957901			0.98	0.96
806.23	0.706198			0.959932			1	1					0.89	0.98
807.23	0.699063			0.981035			0.97	0.96
808.23	0.69002			0.959695			0.97	0.97		0.808431	0.82245	0.796546	0.92	0.91
809.23	0.691464			0.961798			0.98	0.97
810.21	0.683547			0.980781			0.98	0.98					0.94	0.94
811.21	0.689401			0.958438			0.99	0.97
812.21	0.692642			0.949707			0.97	0.98		0.817812	0.811606	0.797618	0.92	0.92
813.22	0.711734			0.988747			0.99	0.97
814.21	0.675948			0.949798			0.98	0.98					0.89	0.98
815.23	0.682876			0.967261			0.98	0.98
816.24	0.695229			0.961425			0.98	0.99		0.803232	0.821874	0.782132	0.89	0.94
817.23	0.699759			1.00335			0.99	0.99
818.23	0.696295			0.969773			0.97	0.97					0.87	0.93
819.23	0.702553			0.961079			0.97	0.98
820.22	0.682532			0.968681			0.98	0.97		0.817586	0.808837	0.784872	0.94	0.87
821.22	0.69014			0.968663			0.96	0.98
822.22	0.690398			0.972669			0.96	0.98					0.96	0.95
823.22	0.680805			0.972004			0.97	0.98
824.23	0.68843			0.960268			0.98	0.98		0.792496	0.805261	0.783681	0.98	0.91
825.23	0.692169			0.980307			0.97	0.97
826.23	0.689117			0.971285			0.96	0.99					0.87	0.85
827.22	0.68965			0.948952			0.98	0.96
828.23	0.691412			0.963965			0.97	0.98		0.818264	0.813336	0.789518	0.96	0.93
829.23	0.675122			0.98038			0.99	0.97
830.23	0.69461			0.955607			0.97	0.98					0.91	0.98
831.23	0.686925			0.970229			0.95	0.98
832.21	0.701169			0.984432			0.97	0.97		0.820072	0.810222	0.797499	0.9	0.96
833.22	0.687647			0.974863			0.97	1.02
834.22	0.693948			0.96361			0.97	1					0.91	0.97
835.23	0.695599			0.977093			0.98	0.99
836.23	0.690836			0.974098			0.97	0.97		0.820864	0.827411	0.810482	0.84	0.92
837.23	0.692547			0.9694			0.97	0.98
838.23	0.686624			0.981891			0.98	0.98					0.87	0.92
839.24	0.682618			0.961006			0.99	0.98
840.24	0.694223			0.987272			0.97	0.99		0.795208	0.80503	0.776653	0.89	0.92
841.24	0.683951			0.947604			0.98	0.97
842.23	0.700335			0.972022			0.99	1					0.91	0.98
843.22	0.698384			0.979588			0.98	0.99
844.21	0.688369			0.973115			0.98	0.98		0.802215	0.793493	0.787373	0.94	0.92
845.25	0.696553			0.950399			0.97	0.99
846.2	0.671203			0.974298			0.96	0.97					0.92	0.91
847.24	0.704582			0.954833			0.97	0.99
848.24	0.691816			0.98252			0.97	0.98		0.796677	0.799031	0.7919	0.92	0.96
849.25	0.679412			0.97011			1	0.99
850.24	0.693157			0.977722			0.97	0.98					0.88	0.92
851.24	0.683254			0.961853			0.97	0.99
852.24	0.679515			0.969692			0.99	0.98		0.814308	0.813798	0.801191	0.86	0.95
853.24	0.683908			0.970893			0.98	0.99
854.24	0.673188			0.953395			0.98	0.98					0.9	0.89
855.24	0.696587			0.979934			0.97	0.97
856.25	0.682851			0.972687			0.97	0.97		0.803458	0.8018	0.794401	0.93	0.94
857.23	0.701427			0.983621			0.97	1.01
858.24	0.681922			0.958138			0.98	0.98					0.9	0.97
859.23	0.684965			0.955297			0.97	0.98
860.23	0.695195			0.976438			0.97	0.98		0.821542	0.810568	0.784396	0.89	0.9
861.23	0.695977			0.947968			0.98	0.97
862.23	0.691447			0.964638			0.99	1					0.93	0.92
863.22	0.673936			0.962499			0.97	0.99
864.25	0.686642			0.965431			0.97	0.97		0.81363	0.814259	0.767719	0.91	0.96
865.24	0.693519			0.959176			0.97	0.97
866.24	0.686616			0.96615			0.97	0.98					0.93	0.89
867.25	0.680822			0.958102			0.96	1
868.24	0.690484			0.964292			0.97	0.98		0.817247	0.796724	0.789875	0.86	0.91
869.24	0.681802			0.959968			0.97	0.98
870.24	0.686005			0.977011			0.96	0.99					0.84	0.94
871.24	0.678441			0.980253			0.97	1
872.25	0.690381			0.954041			0.99	0.99		0.816908	0.807337	0.781894	0.94	0.92
873.23	0.673334			0.955561			0.97	0.98
874.22	0.690381			0.967261			0.98	0.98					0.87	0.93
875.24	0.670119			0.958957			0.98	0.96
876.25	0.695667			0.94876			0.98	0.97		0.830922	0.812298	0.803812	0.88	0.9
877.23	0.681888			0.9633			0.98	0.99
878.24	0.680211			0.974954			0.96	0.99					0.89	0.94
879.24	0.692564			0.958093			0.97	0.99
880.24	0.683306			0.952785			0.96	0.98		0.809562	0.796839	0.783562	0.92	0.95
881.23	0.687407			0.973825			0.96	1
882.23	0.692865			0.967261			0.99	0.99					0.92	0.96
883.23	0.677108			0.969728			0.99	0.98
884.22	0.688137			0.955916			0.99	0.97		0.803345	0.780572	0.766528	0.85	0.91
885.22	0.685361			0.985424			0.97	0.99
886.22	0.689762			0.970957			0.98	0.97					0.9	0.94
887.22	0.689401			0.948715			0.99	0.98
888.23	0.695796			0.978231			0.97	0.99		0.791478	0.801569	0.778678	0.89	0.97
889.23	0.69051			0.956608			0.98	0.99
890.24	0.67875			0.967288			0.98	0.98					0.88	0.95
891.24	0.682636			0.959613			0.97	1
892.23	0.691395			0.956272			0.98	0.99		0.807188	0.810452	0.781418	0.92	0.86
893.23	0.690106			0.968417			0.97	0.98
894.21	0.69051			0.952366			0.97	0.99					0.93	0.94
895.22	0.671598			0.976283			0.98	0.98
896.23	0.690493			0.967588			0.98	0.98		0.791704	0.794186	0.779512	0.92	0.97
897.22	0.684613			0.955179			0.96	0.97
898.22	0.67667			0.961415			0.98	0.98					0.93	0.89
899.25	0.67667			0.95883			0.97	0.98
900.23	0.678243			0.971203			0.98	0.96		0.826967	0.806184	0.767719	0.93	0.95
901.23	0.68261			0.981418			0.98	0.96
902.23	0.667833			0.966942			0.97	0.98					0.88	0.97
903.22	0.692796			0.976329			0.99	0.98
904.23	0.692177			0.962044			0.98	0.98		0.770118	0.789802	0.787373	0.89	0.91
905.24	0.672243			0.96188			0.99	0.99
906.24	0.695994			0.96727			0.96	1					0.87	0.87
907.26	0.678423			0.952284			0.98	0.98
908.26	0.672819			0.970866			0.97	0.97		0.805154	0.786225	0.768315	0.95	0.93
909.24	0.673206			0.947668			0.97	1.01
910.24	0.709327			0.977785			0.98	0.99					0.9	0.93
911.24	0.679429			0.96645			0.96	1
912.24	0.690364			0.981463			0.98	0.97		0.792156	0.814259	0.786778	0.94	0.91
915.31	0.681544			0.957719			0.96	1
916.34	0.67293			0.964711			0.98	0.97					0.89	0.95
917.37	0.66981			0.97977			0.97	0.99
918.39	0.68359			0.993472			0.99	0.98		0.799955	0.8003	0.786421	0.85	0.91
919.4	0.674718			0.973087			0.97	0.99
920.42	0.677719			0.96737			0.98	0.97					0.95	0.91
921.43	0.668521			0.9567			0.98	0.98
922.47	0.67569			0.957728			0.98	1		0.786845	0.794878	0.755807	0.91	0.92
923.49	0.680263			0.965075			0.97	0.98
924.52	0.675449			0.94612			0.99	0.97					0.89	0.95
925.54	0.68947			0.948396			0.98	0.97
926.56	0.666466			0.959585			0.96	0.97		0.804815	0.792224	0.77427	0.92	0.91
927.59	0.682954			0.94795			0.99	0.99
928.61	0.681209			0.947668			0.97	0.97					0.9	0.92
929.61	0.687071			0.972414			0.97	0.97
930.61	0.683246			0.971649			0.98	0.97		0.80877	0.788994	0.764145	0.97	0.93
931.61	0.685361			0.950836			0.97	0.98
932.61	0.686065			0.96727			0.98	0.98					0.93	0.9
933.62	0.68016			0.967652			0.97	0.97
934.61	0.696209			0.957665			0.98	0.96		0.792043	0.795455	0.7757	0.89	0.92
935.61	0.671951			0.973515			0.99	0.97
936.61	0.672311			0.964748			0.97	0.99					0.89	0.94
937.62	0.666681			0.961834			0.98	0.97
938.62	0.679145			0.956772			0.98	0.99		0.774186	0.785995	0.777129	0.91	0.94
939.6	0.676713			0.972851			0.97	0.98
940.6	0.670902			0.962945			0.97	0.98					0.87	0.91
941.6	0.678466			0.957055			0.95	1
942.58	0.675105			0.958156			0.97	0.97		0.783906	0.813798	0.776534	0.84	0.93
943.62	0.679214			0.955689			0.99	0.98
944.59	0.674065			0.949407			0.97	0.98					0.88	0.88
945.61	0.68053			0.966159			0.98	0.98
946.61	0.672569			0.962153			0.96	0.98		0.793739	0.790955	0.775343	0.93	0.88
947.62	0.673059			0.961771			0.97	0.99
948.62	0.685043			0.964311			0.97	0.98					0.91	0.96
949.62	0.670618			0.955625			0.97	1.01
950.61	0.669879			0.970056			0.97	0.98		0.795434	0.784264	0.769744	0.93	0.86
951.61	0.691189			0.967215			0.97	0.99
952.62	0.672673			0.972332			0.98	0.99					0.9	0.93
953.62	0.662331			0.966295			0.97	0.99
954.58	0.672922			0.966987			0.98	0.97		0.797355	0.797416	0.770459	0.86	0.93
955.58	0.685343			0.947204			0.98	0.99
956.63	0.68157			0.953731			0.97	0.97					0.87	0.91
957.59	0.668495			0.96767			0.98	0.99
958.57	0.681183			0.958885			0.98	0.99		0.807527	0.7988	0.777606	0.9	0.95
959.62	0.665426			0.944991			0.96	0.96
960.63	0.673326			0.968417			0.97	0.97					0.92	0.93
961.61	0.686633			0.947604			0.97	0.99
962.61	0.68702			0.951501			0.98	0.98		0.789783	0.781841	0.77844	0.94	0.93
963.61	0.681303			0.962253			0.98	0.98
964.61	0.66399			0.968817			0.98	0.98					0.92	0.94
965.61	0.656546			0.960023			0.99	0.98
966.61	0.670188			0.955261			0.97	0.97		0.798034	0.782764	0.747231	0.9	0.89
967.62	0.680547			0.961798			0.97	0.97
968.62	0.671314			0.955206			0.97	0.97					0.88	0.95
969.62	0.661944			0.944308			0.98	0.99
970.58	0.678716			0.984013			0.97	0.98		0.799164	0.782534	0.768434	0.93	0.95
971.62	0.680246			0.948633			0.96	0.97
972.62	0.660569			0.972687			0.98	0.98					0.91	0.94
973.61	0.66234			0.97855			0.97	0.98
974.62	0.661721			0.955907			0.97	0.98		0.780176	0.776765	0.781656	0.93	0.94
975.62	0.681828			0.962918			0.99	0.98
976.62	0.6801			0.961525			0.98	0.96					0.87	0.92
977.63	0.679275			0.935941			0.96	0.98
978.59	0.67465			0.962881			0.98	0.98		0.784245	0.793955	0.760929	0.89	0.93
979.63	0.676429			0.94907			0.98	0.97
980.63	0.679489			0.969091			0.98	0.96					0.9	0.91
981.63	0.6861			0.938409			0.98	0.99
982.62	0.673292			0.950244			0.98	0.97		0.810805	0.798916	0.782013	0.85	0.92
983.63	0.660621			0.961152			0.99	1
984.62	0.67606			0.976383			0.97	0.97					0.85	0.91
985.58	0.662632			0.982911			0.98	0.98
986.58	0.690424			0.953103			0.98	0.98		0.779724	0.794301	0.770459	0.88	0.92
987.61	0.653701			0.949079			0.97	0.98
988.61	0.671598			0.961834			0.97	1					0.96	0.9
989.59	0.661962			0.965358			0.98	0.98
990.61	0.660947			0.962927			0.98	0.98		0.781533	0.807337	0.778797	0.85	0.9
991.62	0.68261			0.974508			0.97	0.98
992.63	0.673919			0.963573			0.97	0.97					0.86	0.91
993.6	0.661987			0.980762			0.98	0.96
994.6	0.668091			0.9632			0.96	0.98		0.797355	0.777573	0.767957	0.85	0.91
995.6	0.680581			0.957428			0.99	0.97
996.61	0.657182			0.981391			0.97	1					0.9	0.88
997.6	0.671589			0.973106			0.97	0.99
998.6	0.683899			0.970556			0.98	0.97		0.810353	0.778726	0.777844	0.92	0.93
999.6	0.668117			0.95923			0.96	0.98
1000.62	0.673592			0.957127			0.99	0.96					0.91	0.88
1001.63	0.665864			0.957073			0.96	0.99
1002.63	0.66516			0.963291			0.97	1		0.785036	0.794647	0.786301	0.83	0.98
1003.63	0.68469			0.964402			0.98	0.98
1004.58	0.671693			0.956326			0.98	0.99					0.89	0.93
1005.63	0.662409			0.96168			0.96	0.99
1006.59	0.660569			0.949999			0.98	0.98		0.787862	0.794532	0.772722	0.91	0.92
1007.63	0.671512			0.945647			0.98	1
1008.62	0.674323			0.972359			0.98	0.96					0.92	0.91
1009.62	0.661214			0.948596			0.98	0.98
1010.63	0.678819			0.972441			0.97	0.97		0.788992	0.784495	0.764145	0.88	0.93
1011.62	0.674572			0.974207			0.95	0.97
1012.59	0.668899			0.974216			0.99	0.98					0.88	0.87
1013.58	0.660655			0.950472			0.97	0.99
1014.63	0.667841			0.938746			0.98	0.99		0.79826	0.793609	0.757951	0.79	0.93
1015.58	0.668787			0.971958			0.99	0.98
1016.61	0.668254			0.953176			0.98	0.98					0.87	0.93
1017.58	0.674951			0.958429			0.98	0.97
1018.58	0.66344			0.963582			0.97	0.98		0.797242	0.808953	0.759142	0.83	0.94
1019.62	0.671452			0.96615			0.98	0.98
1020.62	0.685352			0.964038			0.97	0.96					0.9	0.92
1021.58	0.668177			0.967233			0.98	0.98
1022.59	0.669217			0.962153			0.98	0.99		0.795999	0.776073	0.744014	0.9	0.9
1023.63	0.677443			0.966086			0.97	0.97
1024.63	0.677074			0.970429			0.95	0.98					0.9	0.92
1025.62	0.676678			0.977394			0.96	0.99
1026.62	0.665813			0.977858			0.96	0.99		0.781307	0.794532	0.781537	0.9	0.93
1027.61	0.675741			0.968699			0.96	0.98
1028.61	0.683306			0.94246			0.98	0.96					0.88	0.95
1029.6	0.671572			0.962189			0.98	0.97
1030.63	0.668933			0.9509			0.98	0.99		0.776221	0.789225	0.771412	0.82	0.91
1031.63	0.684037			0.953376			0.98	0.98
1032.61	0.663337			0.952712			0.95	0.97					0.91	0.92
1033.59	0.663647			0.959658			0.96	0.98
1034.63	0.673343			0.971185			0.97	0.99		0.779611	0.776765	0.767957	0.89	0.93
1035.63	0.677435			0.954505			0.96	0.96
1036.62	0.653451			0.980316			0.97	0.97					0.88	0.87
1037.58	0.655781			0.957792			0.96	0.98
1038.63	0.665022			0.94358			0.98	0.98		0.792609	0.784725	0.754259	0.9	0.88
1039.63	0.677744			0.959258			0.98	0.99
1040.58	0.67293			0.960423			0.97	0.98					0.84	0.88
1041.6	0.656443			0.960742			0.96	0.99
1042.6	0.668882			0.961033			0.97	0.98		0.805041	0.805607	0.758904	0.86	0.91
1043.63	0.672011			0.95304			0.98	0.98
1044.64	0.677409			0.94612			0.98	0.99					0.93	0.91
1045.59	0.662048			0.954205			0.97	0.97
1046.63	0.652686			0.969127			0.96	0.98		0.788766	0.813452	0.754854	0.86	0.89
1047.64	0.660509			0.963018			0.98	0.98
1048.6	0.67018			0.95446			0.96	0.99					0.89	0.91
1049.64	0.677125			0.958866			0.97	0.98
1050.64	0.665968			0.946138			0.98	0.99		0.803119	0.787379	0.767719	0.9	0.91
1051.58	0.669595			0.947313			0.96	1
1052.62	0.676816			0.969091			0.98	0.98					0.9	0.91
1053.62	0.669862			0.954068			0.98	0.98
1054.63	0.670506			0.948624			0.97	0.97		0.800294	0.789917	0.769029	0.9	0.95
1055.63	0.683985			0.964338			0.96	0.99
1056.58	0.675312			0.955607			0.98	0.99					0.87	0.92
1057.63	0.674134			0.969773			0.98	1
1058.62	0.684647			0.956781			0.99	0.98		0.78481	0.775842	0.786182	0.89	0.92
1059.62	0.658575			0.939902			0.97	0.97
1060.62	0.674994			0.962162			0.98	0.98					0.87	0.92
1061.63	0.671564			0.955243			0.97	0.97
1062.63	0.657844			0.965749			0.97	0.98		0.788201	0.771343	0.762597	0.91	0.93
1063.63	0.661274			0.965777			0.99	0.98
1064.59	0.669862			0.95324			0.96	0.96					0.93	0.92
1065.64	0.660578			0.945401			0.98	1
1066.64	0.661583			0.957291			0.98	0.99		0.768196	0.802492	0.756641	0.86	0.87
1067.61	0.660887			0.956718			0.98	0.97
1068.61	0.668907			0.945337			0.98	0.98					0.9	0.91
1069.64	0.64991			0.953786			0.99	0.98
1070.6	0.664618			0.968053			0.97	0.97		0.803345	0.780918	0.75676	0.88	0.92
1071.59	0.662589			0.963992			0.97	0.99
1072.59	0.682154			0.959249			0.97	0.99					0.85	0.85
1073.63	0.681638			0.962872			0.99	0.98
1074.61	0.666922			0.977749			0.97	0.99		0.790461	0.779995	0.761048	0.88	0.94
1075.62	0.671211			0.964693			0.95	0.97
1076.64	0.665753			0.950117			0.97	0.99					0.86	0.94
1077.62	0.656787			0.959558			0.98	0.98
1078.62	0.67606			0.961853			0.96	0.98		0.803458	0.784956	0.741632	0.92	0.89
1079.62	0.667025			0.955989			0.98	0.97
1080.63	0.66301			0.964411			0.97	0.97					0.9	0.9
1081.62	0.658179			0.9632			0.97	0.98
1082.61	0.664076			0.939966			0.98	0.99		0.783228	0.785302	0.764265	0.84	0.88
1083.63	0.650279			0.950053			0.98	0.98
1084.63	0.657526			0.957419			0.97	0.98					0.8	0.87
1085.62	0.650958			0.93921			0.98	0.97
1086.62	0.65052			0.975345			0.96	0.97		0.769553	0.793378	0.774747	0.9	0.9
1087.62	0.6575			0.964056			0.98	0.96
1088.59	0.661265			0.972004			0.97	0.98					0.92	0.94
1089.64	0.663698			0.958493			0.98	0.98
1090.64	0.668228			0.968025			0.98	0.98		0.801085	0.789456	0.772365	0.89	0.94
1091.59	0.671194			0.953103			0.96	0.99
1092.64	0.649617			0.958985			0.99	0.97					0.83	0.91
1093.64	0.665778			0.95852			0.96	0.98
1094.63	0.679833			0.97489			0.99	0.97		0.779272	0.770881	0.778082	0.88	0.94
1097.8	0.665331			0.957683			0.97	0.98
1098.84	0.664609			0.955598			0.97	0.98					0.87	0.93
1099.85	0.656039			0.945729			0.98	0.99
1100.85	0.651603			0.967962			0.97	0.98		0.768196	0.77042	0.758904	0.85	0.96
1101.89	0.655996			0.969473			0.98	0.98
1102.9	0.662916			0.971194			0.98	0.97					0.88	0.91
1103.94	0.65364			0.954041			0.99	0.96
1104.99	0.665632			0.952129			0.98	0.97		0.774977	0.755307	0.78106	0.85	0.93
1105.99	0.656099			0.961415			0.99	0.96
1107.02	0.675587			0.963173			0.98	0.99					0.86	0.9
1108.05	0.670532			0.965485			0.97	0.97
1109.04	0.667128			0.957018			0.97	0.96		0.792835	0.793609	0.764741	0.84	0.89
1110.08	0.672879			0.956636			0.98	0.96
1111.11	0.645019			0.962189			0.98	0.98					0.9	0.86
1112.12	0.675269			0.960296			0.96	0.97
1113.1	0.667059			0.960314			0.99	0.97		0.778368	0.768113	0.776653	0.86	0.9
1114.09	0.659168			0.977712			0.96	0.95
1115.12	0.663139			0.96615			0.97	0.99					0.88	0.91
1116.08	0.666905			0.967597			0.97	0.98
1117.08	0.661876			0.967643			0.97	1.01		0.782437	0.777457	0.771531	0.89	0.84
1118.07	0.645027			0.957018			0.96	0.97
1119.11	0.655669			0.95141			0.99	0.98					0.86	0.9
1120.12	0.660191			0.961343			0.97	0.99
1121.12	0.663251			0.979096			0.97	0.97		0.787975	0.773766	0.753425	0.86	0.86
1122.11	0.652987			0.941258			0.98	0.99
1123.12	0.653933			0.949744			0.97	0.97					0.87	0.87
1124.08	0.675741			0.958384			0.97	0.95
1125.08	0.669733			0.967106			0.97	0.98		0.780628	0.762806	0.772126	0.87	0.85
1126.08	0.677323			0.958812			1	0.99
1127.08	0.666028			0.950518			0.96	0.96					0.87	0.92
1128.12	0.653933			0.95293			0.99	0.97
1129.12	0.651225			0.952338			0.98	0.98		0.7908	0.784725	0.774509	0.86	0.9
1130.13	0.673154			0.94897			0.99	0.96
1131.12	0.6526			0.937298			0.95	0.98					0.87	0.89
1132.13	0.648818			0.951537			0.99	0.97
1133.09	0.658463			0.96534			1	0.95		0.768196	0.794878	0.772365	0.88	0.96
1134.11	0.672234			0.959759			0.96	0.98
1135.11	0.668409			0.957728			0.99	0.98					0.85	0.89
1136.11	0.647795			0.953285			1	0.98
1137.12	0.673274			0.956326			0.97	0.98		0.795886	0.789109	0.779631	0.88	0.89
1138.12	0.671134			0.962126			0.99	0.97
1139.08	0.657088			0.971958			0.97	0.96					0.86	0.93
1140.1	0.658351			0.951191			0.97	0.96
1141.11	0.661188			0.964265			0.99	0.97		0.765145	0.775842	0.747588	0.85	0.87
1142.13	0.651517			0.948169			0.98	0.97
1143.11	0.661575			0.954014			0.97	0.99					0.92	0.89
1144.12	0.656022			0.944955			0.97	0.99
1145.12	0.660208			0.952211			0.99	0.97		0.783115	0.761998	0.769267	0.95	0.91
1146.12	0.661497			0.947886			0.97	0.98
1147.11	0.662262			0.962481			0.97	0.96					0.88	0.87
1148.12	0.661214			0.968317			0.95	0.97
1149.12	0.648147			0.960296			0.99	0.94		0.766953	0.758999	0.747469	0.82	0.95
1150.12	0.664592			0.953376			0.97	0.97
1151.12	0.666664			0.949744			0.97	0.98					0.87	0.88
1152.12	0.650812			0.945			0.98	0.97
1153.12	0.657431			0.970128			0.99	0.98		0.775882	0.788071	0.737463	0.91	0.94
1154.11	0.662262			0.960687			0.98	0.98
1155.13	0.665624			0.954706			0.98	0.96					0.88	0.9
1156.1	0.673859			0.954833			0.98	0.97
1157.11	0.676653			0.953331			0.98	0.98		0.784923	0.784033	0.767838	0.87	0.91
1158.11	0.657096			0.971958			0.97	0.96
1159.11	0.664197			0.973725			0.99	0.96					0.85	0.88
1160.1	0.664644			0.961962			0.97	0.97
1161.08	0.666028			0.956608			0.97	0.98		0.759268	0.763383	0.744967	0.89	0.85
1162.12	0.653589			0.946776			0.98	0.98
1163.11	0.671185			0.942469			0.98	0.98					0.89	0.9
1164.11	0.665306			0.953968			0.99	0.97
1165.08	0.641253			0.945774			0.99	0.97		0.772491	0.780803	0.755807	0.82	0.95
1166.09	0.660818			0.955225			0.98	0.98
1167.12	0.664609			0.955516			0.97	0.97					0.79	0.89
1168.12	0.664042			0.965695			0.98	0.97
1169.12	0.668873			0.948278			0.98	0.99		0.764128	0.774112	0.753067	0.86	0.91
1170.12	0.659735			0.95375			0.98	1
1171.12	0.666612			0.940949			0.98	0.96					0.87	0.81
1172.12	0.668761			0.961033			0.98	0.97
1173.12	0.675303			0.946402			0.97	0.97		0.793061	0.774804	0.73782	0.89	0.91
1174.12	0.672509			0.9384			0.97	0.96
1175.13	0.676721			0.950454			0.97	0.97					0.85	0.89
1176.12	0.660457			0.949034			0.95	0.97
1177.11	0.654603			0.94531			0.96	0.99		0.777916	0.804222	0.754259	0.88	0.94
1178.12	0.656761			0.9508			0.95	0.98
1179.12	0.664326			0.952593			0.97	0.98					0.9	0.9
1180.12	0.675991			0.965758			0.98	0.99
1181.13	0.651904			0.953777			0.96	0.96		0.781646	0.781264	0.752472	0.85	0.9
1182.12	0.64997			0.957109			0.98	0.96
1183.12	0.660861			0.957382			0.98	0.98					0.83	0.93
1184.12	0.67906			0.972641			0.96	0.96
1185.12	0.668821			0.969646			0.99	0.97		0.764467	0.771689	0.752948	0.9	0.84
1186.13	0.666372			0.958766			0.99	0.97
1187.13	0.661876			0.946703			0.97	0.97					0.86	0.9
1188.12	0.664721			0.952666			0.98	0.97
1189.12	0.657053			0.948196			0.96	0.99		0.785488	0.776304	0.723288	0.86	0.89
1190.11	0.658798			0.952211			0.97	0.98
1191.14	0.655824			0.971958			0.97	0.97					0.87	0.88
1192.09	0.663002			0.961661			0.96	0.97
1193.13	0.650898			0.959194			0.97	0.98		0.758024	0.79084	0.749256	0.9	0.92
1194.12	0.656366			0.947522			0.97	0.99
1195.12	0.661188			0.945783			0.99	0.97					0.83	0.94
1196.12	0.665237			0.941368			0.98	0.97
1197.12	0.662907			0.982137			0.98	0.96		0.741524	0.753	0.745206	0.86	0.86
1198.12	0.662529			0.96391			0.98	0.98
1199.12	0.669139			0.9631			0.98	0.97					0.87	0.92
1200.12	0.649093			0.947768			0.97	0.97
1201.11	0.66393			0.959167			0.97	0.98		0.772265	0.789225	0.755688	0.83	0.9
1202.11	0.657053			0.944955			0.97	0.97
1203.09	0.657775			0.948214			0.97	0.96					0.83	0.88
1204.13	0.657741			0.956945			0.96	0.99
1205.13	0.655729			0.961625			0.97	0.98		0.754634	0.759345	0.746397	0.88	0.86
1206.13	0.670137			0.930879			0.96	0.97
1207.13	0.66154			0.935796			0.97	0.97					0.92	0.88
1208.09	0.65432			0.961989			0.99	0.97
1209.13	0.663277			0.963673			0.98	0.97		0.757233	0.759114	0.765337	0.86	0.91
1210.09	0.656408			0.934366			0.98	0.95
1211.11	0.669415			0.953376			0.97	0.99					0.88	0.85
1212.13	0.654672			0.941404			0.97	0.97
1213.1	0.656675			0.935923			0.97	0.97		0.788992	0.781149	0.740798	0.83	0.89
1214.11	0.656632			0.935468			0.97	0.98
1215.09	0.662933			0.955962			0.99	0.97					0.87	0.88
1216.13	0.653022			0.964912			0.99	0.99
1217.12	0.657053			0.960633			0.96	0.97		0.771474	0.763152	0.761287	0.84	0.89
1218.12	0.653365			0.955498			0.98	0.97
1219.11	0.653331			0.941067			0.96	0.95					0.86	0.86
1220.11	0.648801			0.9388			0.98	0.99
1221.11	0.657019			0.952193			0.97	0.98		0.762319	0.776188	0.751757	0.88	0.87
1222.11	0.648466			0.947468			0.97	0.97
1223.11	0.658738			0.952266			0.98	0.98					0.89	0.87
1224.11	0.649136			0.95954			0.95	0.97
1225.12	0.654062			0.945337			0.97	0.97		0.767744	0.762575	0.744848	0.85	0.93
1226.12	0.65083			0.948114			0.98	0.98
1227.12	0.647348			0.943808			0.98	0.97					0.83	0.94
1228.13	0.646454			0.959613			0.99	0.98
1229.13	0.65885			0.959731			0.97	0.97		0.780176	0.762575	0.76355	0.88	0.89
1230.12	0.665667			0.946193			0.97	0.99
1231.12	0.66369			0.952193			0.98	0.96					0.82	0.84
1232.12	0.65266			0.944327			0.98	0.96
1233.12	0.658815			0.949543			0.98	0.98		0.769892	0.781611	0.760929	0.84	0.88
1234.11	0.640566			0.96574			0.98	0.98
1235.11	0.655317			0.966815			0.98	0.98					0.89	0.9
1236.13	0.652239			0.942815			0.98	0.97
1237.12	0.656168			0.94145			0.98	0.98		0.767405	0.769266	0.76486	0.88	0.94
1238.12	0.662219			0.962344			0.97	0.96
1239.13	0.641975			0.95303			0.97	0.97					0.89	0.93
1240.1	0.649583			0.95446			0.97	0.99
1241.11	0.667351			0.959167			0.99	0.98		0.756216	0.767651	0.750566	0.91	0.87
1242.11	0.652592			0.948342			0.97	0.96
1243.1	0.641623			0.955179			0.99	0.97					0.78	0.88
1244.14	0.660836			0.962718			0.96	0.97
1245.14	0.65542			0.962781			0.99	0.97		0.771474	0.772381	0.757832	0.85	0.94
1246.12	0.661601			0.965403			0.98	0.97
1247.12	0.648474			0.952238			0.97	0.96					0.85	0.82
1248.11	0.653675			0.943571			0.97	0.96
1249.14	0.658721			0.963519			0.98	0.98		0.729883	0.769843	0.751638	0.84	0.86
1250.13	0.670102			0.969027			0.98	0.97
1251.13	0.648784			0.948478			0.98	0.96					0.86	0.87
1252.12	0.645672			0.944864			0.97	0.97
1253.11	0.669372			0.943134			0.96	0.98		0.767744	0.758537	0.750685	0.89	0.91
1254.11	0.658824			0.945638			0.96	0.97
1255.12	0.642766			0.956554			0.98	0.98					0.89	0.91
1256.11	0.645053			0.965795			0.98	0.95
1257.11	0.659795			0.966833			0.97	0.96		0.753843	0.759575	0.751757	0.82	0.94
1258.12	0.659486			0.957009			0.98	0.96
1259.11	0.638545			0.951164			0.97	0.97					0.86	0.91
1260.11	0.639182			0.926427			0.97	0.98
1261.09	0.651913			0.943516			0.98	0.99		0.767744	0.754269	0.734961	0.88	0.89
1262.09	0.656323			0.955133			0.96	0.96
1263.14	0.658489			0.94937			0.98	0.97					0.83	0.84
1264.09	0.660767			0.939811			0.96	0.96
1265.09	0.644726			0.969764			0.96	0.96		0.742428	0.7485	0.755331	0.84	0.87
1266.14	0.648775			0.936205			0.99	0.97
1267.11	0.65193			0.955671			0.98	0.96					0.86	0.88
1268.09	0.649867			0.957674			0.97	0.97
1269.11	0.653683			0.947868			0.98	0.97		0.762658	0.766613	0.749851	0.87	0.87
1270.13	0.652368			0.957692			0.96	0.98
1271.13	0.655291			0.940557			0.97	0.98					0.82	0.87
1272.13	0.653683			0.944909			0.97	0.96
1273.14	0.659821			0.941076			0.97	0.98		0.756216	0.780457	0.737105	0.85	0.91
1274.14	0.657156			0.947468			0.98	0.97
1275.11	0.660139			0.942806			0.99	0.97					0.86	0.87
1276.14	0.650537			0.955598			0.97	0.95
1277.09	0.639474			0.944745			0.97	0.97		0.779837	0.771343	0.75271	0.84	0.92
1280.21	0.644778			0.95242			0.97	0.97
1281.22	0.661919			0.957073			0.96	0.98					0.85	0.85
1282.27	0.654621			0.963992			0.97	0.97
1283.28	0.661953			0.953841			0.98	0.98		0.76311	0.774804	0.73377	0.85	0.86
1284.31	0.667721			0.954214			0.96	0.97
1285.34	0.649093			0.966915			0.99	0.97					0.83	0.9
1286.38	0.65677			0.959986			0.97	0.97
1287.38	0.656778			0.958894			0.96	0.98		0.777464	0.767074	0.747707	0.87	0.86
1288.39	0.654354			0.932363			0.99	0.98
1289.43	0.660191			0.973625			0.98	0.96					0.84	0.88
1290.46	0.640273			0.957045			0.97	0.95
1291.47	0.660861			0.978341			0.96	0.97		0.748418	0.760383	0.738178	0.8	0.92
1292.51	0.637755			0.967661			0.96	0.97
1293.5	0.654337			0.959941			0.99	0.97					0.84	0.89
1294.5	0.649299			0.957473			0.96	0.98
1295.53	0.66252			0.962808			0.97	0.97		0.753391	0.750808	0.746992	0.93	0.86
1296.48	0.654431			0.970238			0.98	0.97
1297.49	0.651887			0.950445			0.98	0.98					0.9	0.85
1298.51	0.647821			0.937708			0.98	0.97
1299.51	0.647451			0.968016			0.97	0.96		0.761754	0.758076	0.744253	0.87	0.87
1300.52	0.643342			0.955607			0.96	0.98
1301.51	0.657483			0.944982			0.96	0.98					0.93	0.89
1302.51	0.647769			0.944372			0.98	0.97
1303.53	0.653305			0.966223			0.97	0.96		0.756103	0.741809	0.732579	0.83	0.92
1304.52	0.665237			0.955306			0.96	0.96
1305.52	0.658833			0.951273			0.97	0.97					0.87	0.84
1306.52	0.646798			0.961461			0.97	0.96
1307.52	0.653683			0.986926			0.97	0.96		0.770005	0.75623	0.736153	0.81	0.84
1308.51	0.653022			0.950618			0.97	0.98
1309.51	0.643368			0.953021			0.97	0.97					0.87	0.88
1310.51	0.639508			0.968781			0.97	0.95
1311.49	0.644339			0.959713			0.98	0.97		0.750113	0.758537	0.734247	0.88	0.91
1312.53	0.645663			0.962581			0.98	0.97
1313.52	0.653314			0.954223			0.98	0.98					0.88	0.9
1314.52	0.647477			0.963382			0.97	0.96
1315.52	0.648242			0.953431			0.98	0.96		0.77057	0.747231	0.72293	0.91	0.9
1316.52	0.647064			0.977521			0.99	0.98
1317.52	0.658111			0.965485			0.97	0.98					0.82	0.87
1318.53	0.645826			0.955935			0.97	0.97
1319.52	0.648216			0.95964			0.98	0.95		0.757911	0.766036	0.728052	0.86	0.88
1320.51	0.654663			0.966122			0.98	0.98
1321.5	0.661566			0.950563			0.96	0.97					0.87	0.88
1322.52	0.652351			0.952994			0.95	0.99
1323.52	0.646153			0.986098			0.97	0.96		0.763223	0.768228	0.748303	0.9	0.89
1324.52	0.644614			0.963983			0.97	0.98
1325.52	0.644726			0.965795			0.94	0.97					0.83	0.9
1326.52	0.652377			0.969518			0.98	0.97
1327.52	0.660836			0.963582			0.96	0.97		0.762545	0.755884	0.745801	0.86	0.87
1328.52	0.650236			0.995675			0.98	0.98
1329.52	0.656073			0.958247			0.97	0.97					0.87	0.89
1330.51	0.650563			0.981236			0.98	0.97
1331.52	0.649824			0.962217			0.97	0.97		0.76198	0.76719	0.736391	0.87	0.91
1332.52	0.655386			0.941495			0.96	0.98
1333.52	0.629562			0.949461			0.97	0.98					0.85	0.9
1334.52	0.64715			0.952011			0.96	0.98
1335.52	0.648887			0.950199			0.97	0.97		0.762771	0.761306	0.73913	0.85	0.89
1336.51	0.654603			0.942542			0.98	0.97
1337.51	0.656048			0.954241			0.95	0.95					0.84	0.85
1338.52	0.633723			0.953103			0.97	0.96
1339.52	0.641262			0.962462			0.97	0.97		0.761641	0.771458	0.730316	0.87	0.9
1340.52	0.656408			0.95121			0.98	0.99
1341.52	0.647417			0.95598			0.97	0.98					0.81	0.87
1342.52	0.634127			0.954478			0.97	0.97
1343.53	0.646127			0.957127			0.96	0.97		0.754295	0.740771	0.735438	0.9	0.87
1344.49	0.652918			0.963564			0.98	0.97
1345.52	0.655643			0.948724			0.99	0.97					0.89	0.9
1346.52	0.648431			0.966505			0.99	0.99
1347.52	0.66044			0.953713			0.97	0.97		0.769439	0.773535	0.751638	0.83	0.93
1348.52	0.648483			0.957036			0.96	0.97
1349.52	0.657139			0.971039			0.97	0.97					0.85	0.93
1350.53	0.640248			0.946457			1	0.98
1351.52	0.6417			0.975172			0.98	0.96		0.747175	0.769497	0.736391	0.86	0.89
1352.53	0.642655			0.977867			0.97	0.96
1353.48	0.645362			0.944654			0.96	0.98					0.88	0.91
1354.54	0.656735			0.957136			0.96	0.98
1355.53	0.645388			0.957428			0.97	0.97		0.731691	0.751038	0.742585	0.87	0.81
1356.52	0.653615			0.980699			0.96	0.95
1357.52	0.653245			0.966978			0.98	0.96					0.82	0.85
1358.52	0.649566			0.955907			0.96	0.99
1359.53	0.643411			0.950918			0.98	0.97		0.765032	0.737425	0.744491	0.87	0.88
1360.52	0.637454			0.97377			0.97	0.97
1361.52	0.661962			0.958202			0.97	0.98					0.87	0.9
1362.52	0.648878			0.945374			0.98	0.96
1363.53	0.664609			0.962581			0.96	0.97		0.746157	0.752307	0.751161	0.87	0.91
1364.53	0.648594			0.957473			0.98	0.95
1365.54	0.642285			0.960696			0.96	0.99					0.84	0.92
1366.52	0.644675			0.964001			0.98	0.97
1367.52	0.655781			0.973197			0.96	0.99		0.759155	0.732464	0.738654	0.84	0.9
1368.5	0.65695			0.966195			0.98	0.98
1369.49	0.660303			0.956463			0.98	0.97					0.88	0.91
1370.53	0.643041			0.944709			0.96	0.96
1371.49	0.660535			0.963318			0.96	0.97		0.758816	0.754845	0.734604	0.82	0.89
1372.5	0.653305			1.00229			0.97	1
1373.51	0.648767			0.958903			0.96	0.98					0.85	0.9
1374.54	0.64544			0.95222			0.97	0.98
1375.5	0.626752			0.953823			0.97	0.97		0.747175	0.769843	0.749017	0.89	0.94
1376.53	0.645087			0.952639			0.97	0.97
1377.52	0.64409			0.966569			0.96	0.95					0.84	0.87
1378.52	0.654621			0.971622			0.96	0.97
1379.51	0.656658			0.947604			0.97	0.97		0.769439	0.761421	0.739369	0.83	0.87
1380.51	0.642242			0.954951			0.98	0.98
1381.49	0.658807			0.954578			0.97	0.95					0.81	0.88
1382.52	0.641322			0.953768			0.99	0.96
1383.52	0.639534			0.945483			0.97	0.98		0.766501	0.762921	0.746039	0.85	0.9
1384.51	0.651208			0.937398			0.97	0.96
1385.49	0.643781			0.959303			0.97	0.98					0.83	0.82
1386.54	0.640591			0.956709			0.97	0.96
1387.54	0.639534			0.951674			0.97	0.96		0.754295	0.746424	0.745801	0.86	0.89
1388.54	0.657423			0.970238			0.96	0.97
1389.54	0.655652			0.959221			0.95	0.97					0.83	0.9
1390.49	0.667145			0.941768			0.97	0.96
1391.54	0.649549			0.946157			0.96	0.98		0.777351	0.766036	0.73246	0.86	0.91
1392.54	0.664025			0.964638			0.98	0.96
1393.51	0.657758			0.959258			0.98	0.93					0.83	0.93
1394.51	0.637179			0.956026			0.98	0.96
1395.51	0.654758			0.966887			0.95	0.97		0.758364	0.75	0.741394	0.84	0.88
1396.49	0.662555			0.973515			0.97	0.98
1397.53	0.642629			0.957492			0.97	0.97					0.84	0.92
1398.52	0.638889			0.947595			0.97	0.98
1399.52	0.641975			0.941331			0.96	0.95		0.767518	0.773535	0.727576	0.88	0.91
1400.53	0.636104			0.970547			0.97	0.97
1401.53	0.666096			0.96513			0.97	0.97					0.87	0.9
1402.53	0.645354			0.961088			0.97	0.94
1403.54	0.662899			0.943589			0.97	0.96		0.765484	0.759114	0.730673	0.89	0.85
1404.51	0.627474			0.942096			0.97	0.96
1405.53	0.649781			0.965349			0.96	0.98					0.84	0.94
1406.53	0.657793			0.946157			0.98	0.96
1407.53	0.651526			0.962317			0.96	0.97		0.772491	0.749308	0.734366	0.89	0.87
1408.53	0.649815			0.960369			0.98	0.96
1409.53	0.63233			0.93555			0.97	0.97					0.83	0.9
1410.53	0.65193			0.951155			0.97	0.98
1411.54	0.638855			0.952038			0.96	0.98		0.745818	0.770997	0.754973	0.85	0.89
1412.49	0.642543			0.95771			0.97	0.97
1413.54	0.65603			0.95862			0.97	0.97					0.86	0.91
1414.53	0.657414			0.954906			0.97	0.97
1415.53	0.639646			0.95862			0.97	0.97		0.752826	0.7485	0.752472	0.83	0.86
1416.53	0.650305			0.933738			0.96	0.96
1417.53	0.660767			0.970975			1	0.96					0.89	0.9
1418.54	0.635064			0.953395			0.96	0.99
1419.54	0.657689			0.969946			0.99	0.95		0.753391	0.785533	0.731745	0.9	0.91
1420.51	0.630199			0.941058			0.97	0.96
1421.5	0.646179			0.960651			1	0.97					0.84	0.91
1422.54	0.636104			0.958566			0.98	0.95
1423.52	0.663234			0.960059			0.97	0.96		0.761528	0.754384	0.759619	0.84	0.9
1424.53	0.639861			0.9508			0.97	0.97
1425.52	0.651474			0.954141			0.95	0.95					0.8	0.91
1426.52	0.648096			0.970265			0.97	0.97
1427.54	0.650529			0.955352			0.99	0.97		0.755651	0.760152	0.738297	0.85	0.94
1428.52	0.636465			0.967233			0.98	0.97
1429.54	0.649746			0.930889			0.97	0.97					0.83	0.9
1430.49	0.648466			0.956709			0.96	0.98
1431.52	0.632047			0.94643			0.96	0.98		0.743332	0.773304	0.742466	0.87	0.86
1432.54	0.642981			0.94988			0.97	0.97
1433.53	0.649256			0.956809			0.97	0.98					0.83	0.94
1434.54	0.651895			0.945792			0.98	0.97
1435.54	0.633775			0.959613			0.98	0.96		0.736777	0.755999	0.741632	0.86	0.86
1436.53	0.626451			0.947267			0.97	0.99
1437.52	0.639912			0.948688			0.96	0.95					0.87	0.84
1438.52	0.653666			0.954478			0.95	0.97
1439.53	0.65015			0.950208			0.98	0.95		0.756668	0.771343	0.736153	0.83	0.88
1440.53	0.642723			0.958812			0.97	0.96
1441.52	0.636405			0.954906			0.97	0.98					0.85	0.86
1442.52	0.648156			0.973479			0.96	0.98
1443.52	0.64501			0.957783			0.96	0.96		0.778029	0.740886	0.740322	0.83	0.91
1444.53	0.645792			0.954924			0.97	0.97
1445.53	0.657836			0.962572			0.97	0.97					0.9	0.92
1446.53	0.645379			0.950882			0.95	0.97
1447.53	0.637497			0.95853			0.98	0.97		0.757798	0.742617	0.731745	0.85	0.89
1448.53	0.645818			0.9757			0.95	0.98
1449.53	0.655695			0.965886			0.97	0.97					0.88	0.9
1450.54	0.638537			0.961488			0.96	0.95
1451.54	0.644726			0.953777			0.97	0.96		0.753052	0.766151	0.733294	0.83	0.87
1452.53	0.655704			0.955953			0.97	0.98
1453.53	0.624456			0.974972			0.98	0.95					0.8	0.87
1454.52	0.648448			0.955252			0.96	0.97
1455.52	0.663285			0.965103			0.97	0.96		0.757685	0.747001	0.745206	0.87	0.87
1456.52	0.663569			0.952284			0.98	0.97
1457.5	0.659168			0.934885			0.95	0.95					0.87	0.9
1458.53	0.645044			0.959695			0.96	0.97
1459.53	0.642809			0.940084			0.96	0.97		0.745592	0.753923	0.742466	0.84	0.91
1462.76	0.636354			0.959604			0.96	0.97
1463.79	0.656726			0.953367			0.98	0.97					0.93	0.92
1464.8	0.639809			0.970484			0.97	0.97
1465.84	0.631583			0.958156			0.97	0.97		0.74887	0.760152	0.711614	0.81	0.92
1466.88	0.647021			0.946912			0.96	0.98
1467.9	0.637729			0.959595			0.96	0.97					0.87	0.89
1468.89	0.636035			0.952439			0.97	0.95
1469.94	0.636379			0.970939			0.97	0.96		0.766049	0.758537	0.713996	0.9	0.9
1470.97	0.645079			0.957118			0.96	0.96
1472	0.635296			0.966141			0.97	0.97					0.85	0.93
1473.01	0.635743			0.950208			0.98	0.96
1474.05	0.624216			0.95121			0.96	0.96		0.730222	0.748616	0.73103	0.91	0.93
1475.07	0.642165			0.930433			0.95	0.97
1476.07	0.646325			0.952648			0.97	0.96					0.85	0.86
1477.04	0.634308			0.94541			0.96	0.96
1478.07	0.625342			0.951264			0.96	0.98		0.737681	0.73731	0.725432	0.87	0.93
1479.07	0.64354			0.955534			0.95	0.96
1480.07	0.634333			0.953067			0.97	0.96					0.86	0.92
1481.06	0.649772			0.951993			0.95	0.97
1482.06	0.646549			0.948733			0.97	0.97		0.736664	0.744001	0.729005	0.78	0.89
1483.07	0.649351			0.93514			0.96	0.97
1484.07	0.645646			0.926473			0.95	0.97					0.82	0.87
1485.07	0.631892			0.965786			0.97	0.97
1486.07	0.644262			0.944773			0.97	0.96		0.748531	0.738233	0.732103	0.85	0.89
1487.07	0.634995			0.944755			0.96	0.97
1488.07	0.636044			0.957036			0.96	0.96					0.76	0.93
1489.04	0.627774			0.950108			0.97	0.97
1490.06	0.634007			0.957146			0.97	0.94		0.745366	0.755422	0.736629	0.82	0.9
1491.06	0.631651			0.925499			0.95	0.96
1492.09	0.637669			0.959495			0.99	0.97					0.88	0.9
1493.05	0.618413			0.951856			0.98	0.96
1494.08	0.625324			0.957464			0.98	0.98		0.748644	0.74204	0.704467	0.83	0.9
1495.03	0.640867			0.959595			0.98	0.98
1496.08	0.636345			0.960805			0.96	0.96					0.83	0.89
1497.03	0.633543			0.932272			0.95	0.97
1498.06	0.621817			0.966459			0.97	0.97		0.764128	0.732695	0.734842	0.84	0.83
1499.04	0.626726			0.944408			0.97	0.98
1500.08	0.643875			0.961388			0.98	0.97					0.88	0.92
1501.06	0.635313			0.945073			0.96	0.96
1502.06	0.631901			0.951619			0.96	0.99		0.740054	0.73904	0.726623	0.83	0.86
1503.04	0.641142			0.932263			0.97	0.95
1504.05	0.641855			0.92976			0.96	0.98					0.92	0.93
1505.06	0.619144			0.956317			0.96	0.98
1506.04	0.636345			0.950472			0.98	0.98		0.757459	0.752884	0.738416	0.86	0.9
1507.07	0.623356			0.943953			0.96	0.97
1508.07	0.639783			0.938855			0.98	0.98					0.83	0.96
1509.08	0.632279			0.97235			0.94	0.96
1510.08	0.633577			0.943207			0.98	0.96		0.741185	0.758537	0.738178	0.83	0.9
1511.05	0.634909			0.977794			0.97	0.98
1512.08	0.63466			0.937425			0.97	0.97					0.83	0.89
1513.06	0.64011			0.954141			0.97	0.97
1514.07	0.627482			0.937444			0.98	0.97		0.727848	0.708814	0.741275	0.81	0.88
1515.04	0.63123			0.946229			0.96	0.96
1516.1	0.647331			0.955589			0.95	0.95					0.9	0.96
1517.07	0.627431			0.946475			0.98	0.97
1518.06	0.631153			0.965121			0.97	0.98		0.75373	0.746078	0.728529	0.87	0.88
1519.05	0.632915			0.97174			0.98	0.96
1520.06	0.64299			0.946812			0.96	0.98					0.83	0.94
1521.05	0.644322			0.94399			0.98	0.97
1522.04	0.627577			0.950618			0.96	0.97		0.766162	0.752538	0.746397	0.85	0.9
1523.08	0.645981			0.939155			0.95	0.97
1524.08	0.624981			0.935286			0.97	0.95					0.82	0.9
1525.07	0.619874			0.951273			0.96	0.96
1526.07	0.624302			0.944026			0.97	0.98		0.752487	0.728773	0.720548	0.82	0.92
1527.08	0.622926			0.95527			0.97	0.96
1528.08	0.627052			0.932382			0.98	0.95					0.84	0.97
1529.04	0.61678			0.94317			0.96	0.96
1530.04	0.639388			0.947923			0.97	0.98		0.744123	0.733272	0.72305	0.89	0.89
1531.04	0.647047			0.924707			0.97	0.95
1532.08	0.626468			0.946521			0.96	0.97					0.81	0.93
1533.07	0.624534			0.934093			0.94	0.96
1534.07	0.63705			0.949808			0.97	0.97		0.732708	0.754615	0.706016	0.88	0.9
1535.07	0.632614			0.953367			0.98	0.95
1536.07	0.63013			0.932254			0.95	0.96					0.85	0.95
1537.06	0.646239			0.942943			0.97	0.97
1538.04	0.619496			0.952739			0.97	0.96		0.75113	0.754384	0.737344	0.87	0.93
1539.08	0.632184			0.946503			0.97	0.97
1540.07	0.642534			0.959312			0.97	0.95					0.85	0.93
1541.07	0.623244			0.94104			0.98	0.95
1542.08	0.633646			0.942151			0.96	0.97		0.73576	0.735579	0.728529	0.88	0.9
1543.08	0.629141			0.954423			0.97	0.98
1544.04	0.621912			0.940366			0.96	0.97					0.87	0.87
1545.06	0.619152			0.935914			0.96	0.97
1546.07	0.625015			0.95456			0.98	0.97		0.75373	0.735925	0.716141	0.87	0.91
1547.08	0.629777			0.957765			0.96	0.97
1548.08	0.640136			0.944272			0.96	0.97					0.87	0.91
1549.09	0.633027			0.948305			0.97	0.95
1550.08	0.626287			0.94175			0.96	0.94		0.75	0.748385	0.726623	0.85	0.88
1551.07	0.634909			0.934084			0.95	0.96
1552.08	0.627319			0.946484			0.96	0.97					0.87	0.95
1553.09	0.640918			0.94582			0.96	0.95
1554.04	0.626004			0.969118			0.96	0.96		0.735194	0.754269	0.716617	0.87	0.9
1555.09	0.62474			0.947677			0.97	0.96
1556.04	0.629923			0.965394			0.97	0.97					0.86	0.89
1557.06	0.617425			0.924042			0.95	0.98
1558.06	0.62015			0.931562			0.96	0.97		0.740167	0.756576	0.727457	0.88	0.93
1559.07	0.633586			0.954933			0.95	0.97
1560.07	0.637471			0.953049			0.98	0.98					0.81	0.94
1561.07	0.616703			0.947568			0.97	0.96
1562.06	0.612164			0.958256			0.97	0.97		0.747514	0.752538	0.68374	0.84	0.91
1563.04	0.64452			0.953103			0.97	0.96
1564.04	0.632571			0.945046			0.97	0.96					0.86	0.92
1565.04	0.614003			0.9571			0.95	0.98
1566.08	0.617046			0.960341			0.96	0.97		0.747966	0.758768	0.751042	0.92	0.92
1567.08	0.628815			0.94511			0.96	0.95
1568.08	0.627001			0.941431			0.96	0.98					0.86	0.92
1569.09	0.638116			0.949516			0.96	0.97
1570.04	0.626726			0.950927			0.98	0.97		0.727848	0.741694	0.733294	0.89	0.89
1571.09	0.633594			0.939228			0.98	0.95
1572.04	0.635356			0.940293			0.98	0.97					0.86	0.94
1573.07	0.635348			0.956645			0.97	0.97
1574.08	0.630981			0.933429			0.98	0.96		0.742993	0.746308	0.727457	0.82	0.9
1575.08	0.63809			0.947823			0.98	0.97
1576.09	0.641219			0.945037			0.97	0.98					0.89	0.92
1577.08	0.632287			0.928439			0.97	0.97
1578.09	0.629846			0.940767			0.96	0.97		0.728526	0.742847	0.738654	0.85	0.92
1579.07	0.626425			0.960041			0.97	0.96
1580.07	0.629829			0.949826			0.97	0.96					0.84	0.87
1581.07	0.624267			0.956363			0.96	0.97
1582.08	0.631583			0.957036			0.96	0.96		0.735534	0.727965	0.723288	0.84	0.92
1583.08	0.624972			0.964766			0.98	0.97
1584.08	0.626674			0.935195			0.98	0.96					0.95	0.92
1585.08	0.642508			0.956363			0.96	0.97
1586.08	0.621568			0.946138			0.97	0.96		0.751469	0.735695	0.721382	0.89	0.99
1587.09	0.626219			0.939993			0.96	0.96
1588.09	0.629494			0.963273			0.97	0.96					0.84	0.93
1589.09	0.634935			0.941868			0.96	0.96
1590.08	0.634531			0.942843			0.95	0.96		0.746949	0.740771	0.73246	0.88	0.95
1591.08	0.623287			0.93921			0.95	0.97
1592.09	0.625746			0.957819			0.96	0.96					0.88	0.95
1593.05	0.623261			0.940621			0.97	0.96
1594.04	0.632924			0.947231			0.95	0.96		0.743219	0.719774	0.731626	0.9	0.85
1595.09	0.62223			0.939938			0.97	0.97
1596.08	0.611596			0.962545			0.96	0.96					0.86	0.89
1597.07	0.624981			0.941896			0.96	0.97
1598.09	0.631961			0.941832			0.97	0.97		0.747627	0.747116	0.732103	0.82	0.92
1599.04	0.615009			0.943616			0.97	1
1600.07	0.617339			0.949389			0.96	0.98					0.87	0.91
1601.07	0.631522			0.947968			0.97	0.98
1602.07	0.631574			0.956572			0.96	0.98		0.722084	0.745385	0.714354	0.83	0.9
1603.07	0.641486			0.939583			0.96	0.96
1604.08	0.625342			0.936779			0.97	0.95					0.83	0.96
1605.06	0.635743			0.95049			0.97	0.97
1606.08	0.616376			0.933001			0.96	0.97		0.761415	0.757845	0.708279	0.86	0.94
1607.04	0.649454			0.937425			0.96	0.97
1608.05	0.62192			0.946839			0.94	0.96					0.89	0.94
1609.08	0.617132			0.947932			0.94	0.96
1610.09	0.630499			0.9388			0.98	0.96		0.746383	0.748731	0.713401	0.92	0.93
1611.09	0.633637			0.945119			0.98	0.96
1612.07	0.636689			0.930497			0.97	0.98					0.9	0.89
1613.05	0.633242			0.93748			0.96	0.96
1614.09	0.619531			0.938199			0.96	0.95		0.726266	0.73904	0.734961	0.83	0.92
1615.05	0.639465			0.932755			0.97	0.97
1616.07	0.636388			0.94399			0.96	0.95					0.89	0.95
1617.05	0.634643			0.956663			0.95	0.95
1618.1	0.64458			0.942442			0.96	0.96		0.722988	0.752884	0.729005	0.87	0.91
1619.05	0.631239			0.946867			0.97	0.96
1620.08	0.634755			0.941076			0.96	0.96					0.91	0.95
1621.07	0.619445			0.945902			0.97	0.96
1622.07	0.627757			0.91664			0.98	0.97		0.71259	0.738233	0.72031	0.83	0.92
1623.05	0.630809			0.941058			0.96	0.97
1624.08	0.625333			0.929441			0.96	0.96					0.86	0.98
1625.07	0.616866			0.934184			0.96	0.96
1626.07	0.635631			0.941823			0.97	0.98		0.730222	0.743886	0.702204	0.85	0.91
1627.06	0.624276			0.948797			0.97	0.97
1628.05	0.63129			0.94765			0.97	0.96					0.92	0.9
1629.08	0.635012			0.944044			0.95	0.97
1630.08	0.618439			0.969409			0.98	0.96		0.751921	0.749654	0.717094	0.9	0.97
1631.05	0.622918			0.952411			0.96	0.96
1632.09	0.629838			0.95425			0.97	0.96					0.94	0.98
1633.06	0.633637			0.951018			0.97	0.95
1634.1	0.640892			0.940302			0.96	0.96		0.723101	0.725196	0.704586	0.94	0.88
1635.05	0.611622			0.946676			0.97	0.96
1636.07	0.624955			0.946594			0.96	0.96					0.83	0.9
1637.07	0.627817			0.934949			0.97	0.96
1638.07	0.630585			0.952648			0.98	0.96		0.75	0.752769	0.707564	0.86	0.94
1639.05	0.649738			0.957783			0.98	0.95
1640.06	0.631643			0.942597			0.96	0.96					0.84	0.93
1641.09	0.634961			0.948305			0.96	0.96
1642.08	0.619006			0.948606			0.95	0.95		0.739828	0.738233	0.715783	0.87	0.91
1645.11	0.619556			0.95222			0.97	0.95
1646.14	0.629915			0.937708			0.94	0.95					0.83	0.91
1647.15	0.635769			0.966468			0.96	0.95
1648.19	0.616874			0.968053			0.96	0.97		0.735873	0.756691	0.731626	0.92	0.91
1649.22	0.622445			0.931435			0.96	0.97
1650.24	0.632021			0.955671			0.95	0.96					0.89	0.92
1651.25	0.636543			0.954815			0.96	0.97
1652.27	0.627594			0.96574			0.97	0.96		0.744349	0.737079	0.730673	0.9	0.92
1653.31	0.628359			0.947631			0.98	0.95
1654.34	0.615912			0.961907			0.96	0.96					0.84	0.88
1655.34	0.621327			0.959558			0.98	0.96
1656.39	0.628892			0.954214			0.98	0.97		0.742428	0.747462	0.705539	0.88	0.93
1657.42	0.63827			0.937034			0.96	0.95
1658.4	0.6368			0.955989			0.96	0.96					0.86	0.85
1659.41	0.623717			0.948223			0.96	0.97
1660.4	0.627921			0.957045			0.95	0.97		0.724005	0.729695	0.731983	0.89	0.89
1661.38	0.635348			0.94104			0.96	0.98
1662.43	0.628471			0.946812			0.96	0.96					0.83	0.97
1663.42	0.627551			0.957018			0.96	0.97
1664.4	0.6207			0.950508			0.97	0.97		0.722197	0.69797	0.710542	0.91	0.91
1665.42	0.635855			0.961097			0.95	0.97
1666.42	0.612757			0.957027			0.95	0.96					0.88	0.98
1667.43	0.618671			0.939847			0.96	0.95
1668.42	0.62762			0.947941			0.96	0.94		0.726153	0.746654	0.727576	0.87	0.98
1669.42	0.621998			0.950062			0.97	0.97
1670.43	0.617313			0.947595			0.95	0.98					0.91	0.92
1671.43	0.633371			0.953449			0.97	0.97
1672.44	0.633121			0.929286			0.96	0.97		0.726944	0.730272	0.706254	0.95	0.9
1673.41	0.636207			0.970984			0.96	0.96
1674.44	0.624491			0.941959			0.96	0.98					0.95	0.9
1675.43	0.62988			0.950745			0.96	0.96
1676.39	0.626545			0.958074			0.97	0.99		0.727283	0.701777	0.705896	0.89	0.87
1677.38	0.626141			0.958429			0.94	0.94
1678.43	0.624087			0.962818			0.95	0.98					0.86	0.91
1679.38	0.624018			0.953795			0.97	0.97
1680.42	0.625488			0.957819			0.97	0.97		0.713156	0.741463	0.718642	0.83	0.93
1681.4	0.622763			0.938063			0.96	0.96
1682.43	0.633757			0.969373			0.98	0.96					0.86	0.88
1683.44	0.626932			0.955616			0.98	0.96
1684.42	0.622462			0.958448			0.96	0.99		0.733047	0.731426	0.692436	0.86	0.92
1685.42	0.630964			0.951592			0.95	0.95
1686.41	0.646841			0.941049			0.96	0.95					0.91	1
1687.41	0.62511			0.942624			0.95	0.97
1688.41	0.623794			0.960578			0.99	0.96		0.703323	0.737656	0.718166	0.85	0.88
1689.41	0.63203			0.969027			0.96	0.96
1690.41	0.627637			0.950918			0.96	0.95					0.9	0.9
1691.43	0.621998			0.945647			0.97	0.96
1692.43	0.625496			0.954032			0.95	0.96		0.732934	0.739502	0.717213	0.82	0.97
1693.42	0.624757			0.95456			0.96	0.98
1694.43	0.624774			0.952584			0.94	0.96					0.84	0.92
1695.41	0.624525			0.965704			0.97	0.97
1696.4	0.629605			0.96137			0.98	0.97		0.725588	0.739732	0.711971	0.91	0.95
1697.43	0.625514			0.943616			0.96	0.95
1698.43	0.631342			0.950791			0.98	0.98					0.9	1
1699.43	0.636431			0.937389			0.98	0.98
1700.42	0.619316			0.955944			0.97	0.96		0.714738	0.739386	0.720072	0.84	0.95
1701.42	0.616255			0.945037			0.96	0.96
1702.42	0.628969			0.943179			0.96	0.98					0.86	0.96
1703.41	0.634471			0.935159			0.96	0.97
1704.43	0.626545			0.974144			0.98	0.96		0.714625	0.735579	0.707207	0.84	0.9
1705.42	0.627895			0.953349			0.96	0.96
1706.41	0.621688			0.972723			0.97	0.97					0.92	0.91
1707.4	0.635477			0.957055			0.95	0.97
1708.44	0.625935			0.944217			0.97	0.97		0.735986	0.718159	0.712448	0.89	0.93
1709.4	0.628316			0.940157			0.95	0.94
1710.43	0.639525			0.939547			0.96	0.97					0.85	0.91
1711.43	0.621723			0.954514			0.96	0.96
1712.43	0.626743			0.934039			0.97	0.96		0.714625	0.73581	0.717451	0.81	0.95
1713.43	0.612473			0.934494			0.94	0.95
1714.43	0.62921			0.959203			0.94	0.98					0.92	0.9
1715.43	0.628196			0.947568			0.96	0.96
1716.42	0.625832			0.964948			0.96	0.96		0.731465	0.736387	0.711733	0.9	0.92
1717.43	0.635528			0.954405			0.96	0.96
1718.43	0.635451			0.93779			0.96	0.97					0.92	0.92
1719.44	0.627998			0.95557			0.97	0.96
1720.39	0.615602			0.936324			0.96	0.96		0.720728	0.726927	0.707326	0.93	0.9
1721.44	0.626476			0.949088			0.96	0.97
1722.44	0.625221			0.954505			0.97	0.96					0.85	0.94
1723.42	0.632373			0.958429			0.97	0.97
1724.42	0.62517			0.971503			0.96	0.98		0.726605	0.728657	0.709232	0.87	0.93
1725.42	0.628522			0.958493			0.95	0.95
1726.42	0.603791			0.946448			0.96	0.97					0.88	0.88
1727.42	0.625118			0.951091			0.97	0.96
1728.42	0.617906			0.931171			0.95	0.96		0.731013	0.729465	0.709351	0.92	0.95
1729.43	0.613049			0.942697			0.97	0.98
1730.42	0.629889			0.945392			0.95	0.95					0.88	0.89
1731.42	0.623743			0.943626			0.95	0.96
1732.43	0.615164			0.94795			0.97	0.95		0.726492	0.722197	0.710899	0.87	0.95
1733.44	0.623751			0.947213			0.98	0.97
1734.44	0.613118			0.96645			0.96	0.96					0.87	0.93
1735.44	0.623855			0.946366			0.97	0.95
1736.43	0.620364			0.946475			0.95	0.96		0.73915	0.731311	0.720667	0.93	0.96
1737.44	0.614846			0.943953			0.96	0.97
1738.43	0.625084			0.959604			0.97	0.95					0.9	0.98
1739.43	0.625075			0.949425			0.96	0.96
1740.43	0.605527			0.954433			0.96	0.96		0.717789	0.739732	0.732103	0.9	0.93
1741.43	0.618637			0.943152			0.96	0.95
1742.44	0.624817			0.935495			0.95	0.97					0.89	0.91
1743.43	0.628548			0.957756			0.96	0.95
1744.42	0.631342			0.93047			0.97	0.97		0.726266	0.730849	0.714711	0.93	0.88
1745.42	0.617253			0.961024			0.97	0.95
1746.42	0.620665			0.951947			0.96	0.97					0.88	0.95
1747.42	0.623476			0.961425			0.98	0.98
1748.43	0.624809			0.958174			0.96	0.95		0.713156	0.74204	0.704467	0.91	0.86
1749.43	0.609997			0.938472			0.96	0.98
1750.42	0.62756			0.963245			0.96	0.98					0.88	0.95
1751.43	0.618233			0.932199			0.97	0.95
1752.42	0.627267			0.949443			0.95	0.96		0.704114	0.719428	0.717927	0.9	0.88
1753.43	0.625711			0.950463			0.97	0.96
1754.43	0.624757			0.941714			0.95	0.95					0.9	0.88
1755.43	0.618207			0.954724			0.95	0.95
1756.43	0.620708			0.953422			0.96	0.97		0.729883	0.705122	0.710899	0.84	0.92
1757.43	0.615576			0.944236			0.96	0.97
1758.42	0.614794			0.94439			0.96	0.98					0.85	0.93
1759.42	0.622789			0.952621			0.97	0.96
1760.41	0.626451			0.945874			0.96	0.97		0.726718	0.732349	0.717689	0.91	0.96
1761.42	0.625548			0.945219			0.96	0.96
1762.43	0.627198			0.927483			0.96	0.96					0.85	0.98
1763.43	0.617897			0.95374			0.96	0.98
1764.44	0.627242			0.956281			0.96	0.97		0.732821	0.735579	0.715426	0.91	0.93
1765.42	0.616926			0.951592			0.96	0.96
1766.44	0.614029			0.959185			0.95	0.96					0.91	0.92
1767.41	0.624834			0.944609			0.95	0.95
1768.41	0.612456			0.966851			0.93	0.97		0.730787	0.745039	0.718999	0.91	0.99
1769.43	0.617691			0.960633			0.96	0.98
1770.43	0.616857			0.958056			0.96	0.96					0.86	0.93
1771.43	0.623115			0.94389			0.96	0.98
1772.43	0.624413			0.939884			0.97	0.96		0.726492	0.725312	0.707088	0.92	0.89
1773.43	0.616874			0.938909			0.95	0.97
1774.44	0.623502			0.947413			0.97	0.98					0.84	0.93
1775.43	0.611983			0.938372			0.95	0.95
1776.43	0.612112			0.956536			0.96	0.98		0.743897	0.722197	0.722692	0.93	0.93
1777.43	0.618181			0.954514			0.96	0.97
1778.42	0.621981			0.93077			0.96	0.97					0.91	0.93
1779.43	0.621766			0.944973			0.97	0.97
1780.44	0.62339			0.937152			0.96	0.95		0.726718	0.719659	0.712686	0.88	0.98
1781.42	0.614889			0.96645			0.97	0.95
1782.41	0.616565			0.938573			0.96	0.96					0.86	1.01
1783.45	0.627938			0.975172			0.96	0.96
1784.43	0.630585			0.946138			0.96	0.96		0.716998	0.699239	0.712567	0.89	0.97
1785.44	0.625127			0.9388			0.96	0.97
1786.44	0.627878			0.945729			0.96	0.95					0.9	0.93
1787.4	0.61935			0.964375			0.96	0.98
1788.44	0.626494			0.952948			0.96	0.96		0.725136	0.745155	0.708755	0.88	0.94
1789.4	0.609249			0.944964			0.96	0.95
1790.39	0.608889			0.952311			0.97	0.96					0.9	0.97
1791.44	0.606782			0.949771			0.98	0.96
1792.45	0.603757			0.930333			0.96	0.96		0.737455	0.733849	0.724241	0.92	0.89
1793.41	0.612112			0.941304			0.96	0.96
1794.42	0.609929			0.976738			0.97	0.96					0.92	0.9
1795.42	0.613359			0.935541			0.97	0.97
1796.42	0.6278			0.936315			0.97	0.96		0.742541	0.715851	0.70006	0.96	0.92
1797.42	0.623803			0.950436			0.96	0.98
1798.44	0.626545			0.935504			0.95	0.97					0.89	0.87
1799.42	0.610745			0.95487			0.95	0.97
1800.42	0.622737			0.963255			0.95	0.95		0.717676	0.717582	0.720429	0.86	0.9
1801.41	0.62964			0.972705			0.95	0.96
1802.4	0.624525			0.953731			0.96	0.96					0.9	0.95
1803.44	0.608682			0.937371			0.95	0.96
1804.42	0.613831			0.950818			0.96	0.97		0.723214	0.706507	0.712805	0.88	0.95
1805.41	0.617528			0.956208			0.97	0.97
1806.42	0.631308			0.949716			0.96	0.95					0.89	0.9
1807.41	0.640299			0.9263			0.96	0.97
1808.41	0.606868			0.942151			0.96	0.98		0.739263	0.734426	0.708041	0.9	0.88
1809.41	0.612843			0.944581			0.97	0.95
1810.41	0.626468			0.95914			0.95	0.96					0.84	0.91
1811.43	0.620691			0.949316			0.96	0.96
1812.42	0.629605			0.964402			0.96	0.97		0.721632	0.739386	0.71078	0.92	0.92
1813.43	0.607591			0.950099			0.96	0.96
1814.43	0.62076			0.954888			0.96	0.96					0.83	0.91
1815.42	0.627534			0.939611			0.96	0.97
1816.44	0.639113			0.952038			0.97	0.97		0.717902	0.744578	0.704348	0.94	0.95
1817.44	0.623365			0.933328			0.96	0.97
1818.43	0.598401			0.943971			0.95	0.98					0.92	0.92
1819.42	0.622806			0.936169			0.97	0.98
1820.42	0.617296			0.946411			0.96	0.95		0.72943	0.713429	0.716021	0.87	0.88
1821.42	0.634428			0.95629			0.97	0.96
1822.42	0.612009			0.942815			0.97	0.95					0.91	0.94
1823.42	0.625453			0.948296			0.97	0.96
1824.41	0.616127			0.942406			0.95	0.95		0.716207	0.727157	0.705658	0.87	0.9
1827.58	0.623433			0.95487			0.96	0.96
1828.62	0.610625			0.961097			0.96	0.96					0.91	0.94
1829.64	0.613788			0.946175			0.98	0.97
1830.66	0.621301			0.960259			0.94	0.94		0.71146	0.72958	0.731983	0.93	0.91
1831.69	0.629958			0.950181			0.95	0.96
1832.69	0.614777			0.942041			0.96	0.97					0.87	0.92
1833.75	0.622316			0.946958			0.96	0.96
1834.76	0.639887			0.930451			0.95	0.97		0.718468	0.730618	0.729125	0.82	0.94
1835.78	0.6278			0.950008			0.97	0.97
1836.79	0.628144			0.950235			0.95	0.95					0.89	0.96
1837.81	0.610272			0.950882			0.95	0.97
1838.85	0.624439			0.951291			0.95	0.96		0.729317	0.719659	0.715545	0.87	0.89
1839.85	0.604367			0.948351			0.94	0.97
1840.89	0.62241			0.949443			0.96	0.97					0.9	0.94
1841.89	0.622462			0.947996			0.95	0.94
1842.89	0.625729			0.954523			0.95	0.96		0.731352	0.74054	0.695057	0.93	1
1843.88	0.613651			0.938536			0.95	0.97
1844.86	0.610659			0.939993			0.96	0.96					0.87	0.96
1845.9	0.627766			0.94104			0.97	0.96
1846.9	0.627465			0.943635			0.94	0.96		0.722988	0.720928	0.705777	0.93	0.9
1847.88	0.606198			0.94287			0.94	0.97
1848.86	0.61996			0.974426			0.95	0.95					0.91	1.03
1849.9	0.625075			0.948396			0.95	0.95
1850.87	0.613737			0.950527			0.95	0.97		0.719372	0.749769	0.693032	0.91	0.88
1851.88	0.628574			0.957109			0.96	0.97
1852.91	0.620622			0.971576			0.95	0.96					0.86	0.92
1853.85	0.608949			0.955871			0.96	0.94
1854.9	0.635468			0.938472			0.96	0.97		0.730448	0.717813	0.685051	0.86	0.97
1855.89	0.624164			0.956308			0.95	0.95
1856.89	0.617485			0.944408			0.96	0.97					0.93	0.95
1857.88	0.614459			0.930096			0.95	0.97
1858.89	0.618594			0.958511			0.96	0.94		0.740619	0.74054	0.727457	0.9	0.95
1859.89	0.623494			0.950499			0.95	0.95
1860.89	0.619273			0.947213			0.97	0.96					0.89	0.93
1861.9	0.622393			0.952247			0.94	0.96
1862.9	0.613032			0.966769			0.95	0.94		0.724119	0.729695	0.708636	0.87	0.94
1863.9	0.619548			0.938937			0.95	0.96
1864.88	0.614124			0.950081			0.95	0.95					0.91	0.91
1865.88	0.613771			0.941431			0.95	0.96
1866.88	0.614115			0.939556			0.95	0.98		0.70434	0.736848	0.695771	0.9	0.95
1867.91	0.625445			0.935996			0.96	0.98
1868.86	0.615413			0.95192			0.94	0.97					0.87	0.88
1869.88	0.630628			0.953777			0.95	0.96
1870.88	0.617915			0.941441			0.96	0.97		0.707279	0.718274	0.713044	0.89	0.97
1871.88	0.616883			0.948596			0.95	0.96
1872.88	0.629958			0.960332			0.95	0.96					0.92	0.95
1873.89	0.609671			0.951282			0.94	0.96
1874.9	0.629511			0.959932			0.95	0.95		0.710104	0.717121	0.711018	0.9	0.93
1875.9	0.635399			0.947568			0.93	0.97
1876.9	0.610522			0.919535			0.94	0.97					0.89	0.95
1877.9	0.612636			0.967224			0.95	0.96
1878.9	0.627181			0.942897			0.96	0.97		0.724345	0.720582	0.703157	0.91	0.97
1879.9	0.628548			0.949753			0.97	0.95
1880.85	0.622419			0.942442			0.96	0.96					0.92	0.91
1881.9	0.619238			0.96472			0.96	0.96
1882.9	0.62131			0.963637			0.93	0.98		0.735986	0.717005	0.707207	0.88	0.93
1883.89	0.614106			0.943999			0.97	0.95
1884.9	0.614158			0.942788			0.96	0.97					0.89	0.93
1885.86	0.607255			0.957036			0.96	0.96
1886.87	0.602338			0.947195			0.97	0.95		0.71259	0.710775	0.693746	0.89	0.93
1887.91	0.625815			0.930106			0.95	0.97
1888.89	0.620304			0.947149			0.95	0.97					0.97	0.92
1889.9	0.631952			0.942579			0.97	0.96
1890.89	0.608536			0.933292			0.96	0.97		0.726266	0.708353	0.707207	0.9	0.94
1891.91	0.627491			0.949744			0.95	0.96
1892.91	0.627465			0.941459			0.97	0.95					0.92	0.94
1893.88	0.622324			0.95202			0.95	0.96
1894.9	0.615026			0.93443			0.96	0.97		0.739263	0.724389	0.710661	0.92	0.97
1895.89	0.610359			0.964347			0.97	0.95
1896.88	0.620605			0.934922			0.95	0.97					0.93	0.9
1897.86	0.609249			0.961097			0.95	0.96
1898.86	0.628488			0.946138			0.96	0.98		0.718694	0.726581	0.711614	0.86	0.93
1899.89	0.616892			0.951883			0.95	0.97
1900.9	0.618903			0.95598			0.94	0.97					0.91	0.89
1901.9	0.61402			0.941796			0.95	0.97
1902.9	0.605785			0.948642			0.95	0.95		0.716885	0.736041	0.700655	0.93	0.93
1903.9	0.614846			0.951			0.97	0.97
1904.9	0.616436			0.95202			0.97	0.97					0.87	0.91
1905.89	0.617467			0.956353			0.95	0.98
1906.9	0.619918			0.955197			0.95	0.95		0.722762	0.711237	0.711733	0.9	0.93
1907.9	0.623072			0.956408			0.95	0.98
1908.91	0.617296			0.955962			0.96	0.97					0.89	0.96
1909.91	0.61237			0.964347			0.97	0.96
1910.89	0.614751			0.951965			0.96	0.95		0.7066	0.730157	0.694104	0.86	0.91
1911.89	0.614124			0.962836			0.96	0.97
1912.86	0.626141			0.934913			0.94	0.97					0.91	0.94
1913.87	0.621972			0.940548			0.96	0.97
1914.91	0.612052			0.923432			0.94	0.98		0.716094	0.716774	0.703514	0.9	0.94
1915.92	0.625488			0.949079			0.96	0.97
1916.87	0.620141			0.947996			0.96	0.97					0.9	0.96
1917.91	0.61139			0.945829			0.96	0.94
1918.86	0.625711			0.939902			0.94	0.96		0.723779	0.715505	0.703038	0.93	0.92
1919.89	0.612336			0.951983			0.96	0.97
1920.89	0.623072			0.961479			0.96	0.97					0.88	0.98
1921.9	0.609301			0.963619			0.95	0.96
1922.9	0.602639			0.963091			0.96	0.97		0.71892	0.714698	0.690173	0.91	0.9
1923.86	0.619247			0.96981			0.96	0.95
1924.9	0.616763			0.955516			0.95	0.97					0.87	0.9
1925.9	0.62413			0.924233			0.94	0.95
1926.91	0.613436			0.942879			0.95	0.97		0.721519	0.717928	0.691483	0.88	0.93
1927.9	0.607143			0.949744			0.95	0.96
1928.86	0.613462			0.947631			0.95	0.97					0.88	0.93
1929.89	0.599699			0.935559			0.96	0.95
1930.89	0.612009			0.952748			0.96	0.96		0.720276	0.723235	0.704705	0.89	0.94
1931.89	0.619264			0.958029			0.96	0.96
1932.89	0.620296			0.949361			0.95	0.97					0.82	0.89
1933.9	0.629459			0.945783			0.95	0.96
1934.9	0.637815			0.964711			0.95	0.97		0.713043	0.736156	0.684812	0.85	0.92
1935.9	0.618551			0.955653			0.95	0.97
1936.9	0.6248			0.942533			0.95	0.98					0.86	0.86
1937.9	0.633689			0.955935			0.96	0.97
1938.9	0.619685			0.937726			0.96	0.98		0.706939	0.706968	0.680882	0.89	0.98
1939.87	0.616488			0.958875			0.94	0.95
1940.91	0.61341			0.95862			0.94	0.96					0.88	0.95
1941.86	0.610711			0.942852			0.96	0.96
1942.89	0.610634			0.944645			0.95	0.96		0.725136	0.712506	0.700179	0.89	0.9
1943.87	0.614553			0.95558			0.97	0.95
1944.89	0.623717			0.937835			0.94	0.95					0.92	0.91
1945.91	0.625393			0.943598			0.95	0.95
1946.91	0.605768			0.947568			0.96	0.96		0.715981	0.70766	0.701251	0.87	0.91
1947.88	0.615043			0.952657			0.95	0.96
1948.88	0.625101			0.945774			0.97	0.97					0.88	0.95
1949.89	0.59865			0.954096			0.95	0.97
1950.89	0.61231			0.95975			0.95	0.96		0.726492	0.711929	0.701727	0.85	0.97
1951.88	0.610066			0.947195			0.95	0.96
1952.86	0.597808			0.948633			0.95	0.97					0.9	0.91
1953.87	0.612662			0.94236			0.96	0.96
1954.87	0.615826			0.932591			0.96	0.95		0.705696	0.723812	0.71626	0.95	0.95
1955.91	0.61035			0.950508			0.95	0.96
1956.91	0.614115			0.946184			0.97	0.96					0.89	0.88
1957.86	0.617794			0.944308			0.94	0.96
1958.91	0.623218			0.953476			0.97	0.97		0.697559	0.72012	0.678618	0.92	0.89
1959.9	0.612731			0.938436			0.97	0.94
1960.91	0.624405			0.946931			0.95	0.97					0.89	0.94
1961.91	0.615473			0.937826			0.94	0.96
1962.87	0.613831			0.948588			0.96	0.96		0.696655	0.715275	0.69196	0.89	0.92
1963.91	0.609636			0.952293			0.95	0.97
1964.9	0.598934			0.949634			0.95	0.96					0.89	0.98
1965.9	0.612765			0.947622			0.95	0.95
1966.91	0.604367			0.956736			0.95	0.96		0.71406	0.705699	0.694818	0.87	0.98
1967.91	0.615731			0.962599			0.94	0.96
1968.9	0.605158			0.944254			0.95	0.96					0.88	0.88
1969.9	0.605115			0.939947			0.95	0.95
1970.9	0.628918			0.944645			0.96	0.97		0.707731	0.724043	0.69184	0.89	0.87
1971.9	0.619943			0.942123			0.94	0.95
1972.9	0.610341			0.954933			0.97	0.98					0.89	0.95
1973.9	0.615808			0.936606			0.97	0.97
1974.9	0.62315			0.934075			0.96	0.96		0.703436	0.707891	0.683621	0.83	0.9
1975.89	0.623356			0.937762			0.94	0.96
1976.9	0.619918			0.943653			0.96	0.95					0.88	0.91
1977.9	0.605441			0.949716			0.96	0.97
1978.9	0.623081			0.936679			0.96	0.96		0.710217	0.724735	0.683264	0.85	0.86
1979.9	0.612679			0.958429			0.95	0.96
1980.9	0.627164			0.938391			0.95	0.96					0.93	0.96
1981.9	0.619195			0.95192			0.96	0.96
1982.9	0.625041			0.945792			0.96	0.96		0.704453	0.711467	0.699345	0.89	0.92
1983.9	0.625832			0.938218			0.96	0.96
1984.9	0.620278			0.953331			0.95	0.97					0.93	0.93
1985.9	0.600034			0.946102			0.95	0.96
1986.87	0.61482			0.949698			0.96	0.95		0.736438	0.712275	0.706254	0.87	0.91
1987.89	0.610668			0.943653			0.95	0.95
1988.89	0.6199			0.956718			0.95	0.95					0.89	0.91
1989.89	0.613367			0.943161			0.95	0.96
1990.88	0.616548			0.969082			0.94	0.96		0.707618	0.736964	0.708279	0.91	0.95
1991.9	0.623648			0.946548			0.96	0.95
1992.91	0.621293			0.946867			0.94	0.96					0.86	0.92
1993.92	0.614399			0.954806			0.95	0.96
1994.89	0.600456			0.951219			0.94	0.95		0.709765	0.690471	0.680643	0.85	0.9
1995.87	0.628806			0.939201			0.93	0.95
1996.91	0.617794			0.949798			0.96	0.96					0.9	0.96
1997.91	0.608287			0.944217			0.96	0.96
1998.87	0.613333			0.946075			0.96	0.96		0.720954	0.700162	0.699702	0.9	0.86
1999.87	0.630895			0.967607				0.97
	0.625462												0.86	0.93
										0.707957	0.71216	0.668731	0.89	0.95
													0.93	0.91
										0.711121	0.719774	0.67302	0.86	0.87
													0.92	0.88
										0.700949	0.711467	0.69732	0.89	0.96
													0.9	0.94
										0.702871	0.717467	0.674092	0.88	0.91
													0.9	0.92
										0.680832	0.726234	0.680524	0.9	0.93
													0.93	0.94
										0.707053	0.698662	0.678023	0.88	0.97
													0.89	0.87

## Sheet: Figure 3-Panel C
[SWR1C]	SWR1Cswc5∆
0	91.3	89.4	88.1
0.894	89.4	88.8	90.9
1.787	87.5	92.5	84.2
3.574	89.2	88.8	89
7.148	83.2	84	82.9
14.297	88.5	90.5	87.7
28.594	92.9	88	88
57.188	85.8	86.5	83.1
144.375	91.5	86.3	84.1
228.75	83.6	81.7	79.6
457.5	88.7	89	88.6
915	84.2	90	85.2

## Sheet: Figure 3-Panel D-Rates
		Basal			AB/AB 77N0 nucleosome			AB/AB 77N0 nucleosome +ZB dimer
SWR1C		1	0.131	0.131	1.89	0.134	0.134	2.4	0.127	0.127
SWR1Cswc5∆					0.79	0.326	0.326	0.85	0.173	0.173
SWR1Cswc5∆+rSwc5					2.05	0.137	0.137	3.11	0.108	0.108
SWR1Cswc5∆+rSwc5RRKR-4A					1.19	0.113	0.113	1.49	0.136	0.136

## Sheet: Figure 3-Panel D-linear range
time sec	SWR1C Basal			SWR1C + 77N0 AB/AB nucleosomes			SWR1C + 77N0 AB/AB nucleosomes +ZB dimer			SWR1Cswc5∆+rSwc5RRKR-4A Basal			SWR1Cswc5∆+rSwc5RRKR-4A + 77N0 AB/AB nucleosomes			SWR1Cswc5∆+rSwc5RRKR-4A + 77N0 AB/AB nucleosomes +ZB dimer			SWR1Cswc5∆+ rSwc5			SWR1Cswc5∆+ rSwc5 + 77N0 AB/AB nucleosomes			SWR1Cswc5∆+ rSwc5 + 77N0 AB/AB nucleosomes +ZB dimer			SWR1Cswc5∆Basal			SWR1Cswc5∆+ 77N0 AB/AB nucleosomes			SWR1Cswc5∆+ 77N0 AB/AB nucleosomes +ZB dimer
0	0	0		0	0		0	0		0	0	0	0	0	0	0	0	0
4	1025.5	-1089.5		-496.5	-1681.5		32.5	-704.5		64.3333	882.333	-1617.67	-1505.67	3557.33	-270.667	353.333	-735.667	-430.667
8	1890.5	818.5		721.5	-977.5		-560.5	1426.5		-2034.33	-1216.33	-880.333	-1490.33	-1009.33	-912.333	-209.333	1136.67	-640.333
12	-1369	122		-391	633		-7	249		-228.667	924.333	-149.667	364.333	-949.667	-724.667	-277.667	3631.33	-500.667
16	-1025	-1505		-1216	337		-928	561		-1504.33	-2225.33	-2306.33	-1329.33	-1217.33	-3027.33	-3203.33	-1793.33	-3041.33
20	-136	-745		808	1882		2043	3148		144.333	1313.33	1730.33	817.333	1474.33	-511.667	-1360.67	4149.33	288.333
24	-736	-864		-1249	1394		-1249	-528		-999	-1078	-37	-2167	-1750	636	-1592	1901	-1207
28	1746	929		-1202	944		-785	1986		-817.333	-208.333	-2514.33	-193.333	-2035.33	-1105.33	-400.333	352.667	-2019.33
32	-1641.5	-1160.5		-1496.5	-1385.5		-2362.5	-2282.5		-1137.67	2371.33	802.333	641.333	-1777.67	2067.33	209.333	3284.33	-1762.67
36	1099	1995		-296	953		713	729		1976.33	3033.33	3545.33	-892.667	-1756.67	1223.33	1975.33	1896.33	-315.667
40	-769.5	881.5		1312.5	-1362.5		-208.5	1409.5		538.667	555.667	411.667	1708.67	-1623.33	747.667	618.667	2317.67	2156.67
44	457	2652		-729	2667		440	4013		2845.33	2124.33	1212.33	315.333	-1270.67	2094.33	1419.33	5600.33	635.333
48	-1681	913		401	2306		65	2083		3044	2483	4517	832	-754	3156	2547	4293	2867
52	-1728.5	-2112.5		-1633.5	-1425.5		-207.5	2451.5		2472	342	1975	598	1191	2666	615	7774	1959
56	833.5	81.5		432.5	703.5		2306.5	1425.5		2013	3503	893	2254	-2167	3520	1373	2879	2525
60	-296	1419		2411	1561		1738	3452		3882.67	3096.67	3305.67	2215.67	404.667	4667.67	4345.67	4089.67	181.667
64	-159	722		1827	-720		979	5383		2290	3813	3541	2291	-257	5350	1682	5750	1200
68	401	-289		256	881		1986	2098		1666.67	2819.67	1793.67	864.667	399.667	3236.67	1185.67	3348.67	687.667
72	1042.5	1603.5		-736.5	176.5		513.5	1987.5		4453.33	3396.33	1298.33	1249.33	-864.667	2291.33	4309.33	6199.33	31.3333
76	231.5	-216.5		3595.5	1031.5		1705.5	2426.5		2419.67	4997.67	4341.67	2258.67	-1826.33	3588.67	2289.67	4821.67	1680.67
80	-303.5	-1633.5		-528.5	1953.5		897.5	3604.5		4351.67	2973.67	1964.67	2893.67	-550.333	4143.67	666.667	5809.67	2460.67
84	-2218	-1497		377	-602		889	-249		1789	1533	1468	2895	-1544	4674	764	4080	1340
88	1313	578		1633	1153		1490	2258		2760	1944	3321	3224	1944	3787	3625	7069	1703
92	2523	-152		-72	1674		1691	3645		2429.67	652.667	3358.67	2172.67	875.667	3231.67	7491.67	4431.67	3870.67
96	-960.5	720.5		352.5	1873.5		-673.5	4276.5		6850	5409	4255	2798	-711	5410	3470	7090	2589
100	513	-1665		1026	1842		401	5462		7203.33	2526.33	2702.33	3390.33	939.333	4625.33	4416.33	5233.33	3101.33
104	-2441	-2025		986	2315		1994	2732		4245.33	4228.33	2899.33	3620.33	-145.667	4341.33	3139.33	9451.33	2930.33
108	-2114.5	481.5		4004.5	127.5		2595.5	3956.5		5120	3086	5169	3118	4143	8245	5472	8740	4703
112	1602	-399		2740	47		2451	3844		1334.33	3657.33	3481.33	4297.33	1862.33	3610.33	3192.33	5884.33	2215.33
116	649	473		4253	-1146		2202	2267		5708	4363	6077	6958	4378	5757	5948	8030	2904
120	1010	1683		3044	2018		2723	4919		4720.33	1661.33	5409.33	2974.33	283.333	2462.33	6146.33	6114.33	2012.33
124	-833.5	433.5		977.5	400.5		192.5	3251.5		3198.33	3503.33	3583.33	4961.33	779.333	5890.33	3903.33	5393.33	3085.33
128	569.5	1002.5		3772.5	2282.5		2780.5	6543.5		3769	3129	2808	4378	1318	4859	4859	5515	-460
132	1266	65		3044	2291		4518	6424		4425.67	5547.67	4954.67	4185.67	-43.3333	3048.67	5706.67	5867.67	1829.67
136	-695.5	681.5		2635.5	633.5		2539.5	2058.5		4095.33	7475.33	3791.33	5504.33	3966.33	3439.33	6081.33	4896.33	5056.33
140	2178.5	705.5		1986.5	3347.5		7432.5	5879.5		6002	7043	4304	5601	2877	5346	6514	7475	3118
144	-4830	-103		2378	632		1914	2026		6770.67	6914.67	4560.67	5008.67	5601.67	6755.67	5536.67	7955.67	6241.67
148	3861	2884		3556	4405		6456	6889		3903.33	4752.33	4976.33	4848.33	1147.33	4929.33	4047.33	6851.33	3501.33
152	1297.5	48.5		3428.5	3219.5		4597.5	7913.5		6172.33	4666.33	2600.33	4298.33	1205.33	5244.33	6219.33	6652.33	2215.33
156	4021	3396		6424	7929		7657	8650		3763.67	4613.67	2162.67	3747.67	1425.67	4037.67	6359.67	7849.67	4852.67
160	1987	3525		4117	3107		7690	6103		3486.33	1180.33	3102.33	2958.33	154.333	5169.33	6497.33	8308.33	2429.33
164	-471.5	-1064.5		1497.5	4012.5		2923.5	3227.5		8170	4469	2931	4982	3011	6984	5926	10540	5558
168	1635	1154		3908	2818		5686	6792		3284.33	2883.33	384.333	416.333	608.333	4246.33	5831.33	8874.33	2018.33
172	1104.5	1778.5		6183.5	1296.5		4885.5	2850.5		5067.33	3049.33	4202.33	4826.33	3673.33	6942.33	4810.33	7566.33	3144.33
176	1827.5	-447.5		4213.5	4805.5		5702.5	5622.5		8533	6402	3135	3021	2590	6035	5729	7539	4591
180	88.5	-2330.5		4188.5	2025.5		5438.5	5741.5		4469.67	5750.67	2707.67	5061.67	495.667	2146.67	5574.67	8120.67	4147.67
184	2699	953		5662	3322		7152	7023		5094	5029	5832	4100	3140	5975	5719	9867	4468
188	1185.5	4133.5		3427.5	8489.5		6455.5	4452.5		4058.67	6012.67	3576.67	2824.67	2695.67	4298.67	6252.67	6204.67	2903.67
192	-1754	2267		4317	4573		6063	6688		3193.33	2343.33	5948.33	4009.33	3737.33	3914.33	3802.33	9263.33	6364.33
196	3237	1875		6728	7961		8843	9292		4469.67	3284.67	5045.67	6310.67	-80.3333	7321.67	4356.67	8313.67	3266.67
200	2796	986		4942	6207		7249	8818		7208.33	5397.33	4020.33	4452.33	5446.33	4758.33	5765.33	10428.3	7319.33
204	1522	881		3508	3459		3092	4548		7042.33	4976.33	5521.33	5905.33	5729.33	6659.33	6946.33	9734.33	6369.33
208	897.5	1409.5		4565.5	5285.5		5334.5	7272.5		6285.33	4442.33	4651.33	6140.33	2712.33	6430.33	5852.33	8495.33	7181.33
212	-753	353		352	4100		5286	8185		6958	5837	5580	5002	5179	8000	6974	11764	6396
216	4429.5	2443.5		3756.5	3387.5		7393.5	8449.5		8516.33	4976.33	4896.33	4143.33	1772.33	7428.33	6946.33	7587.33	5296.33
220	3516	4718		6464	5998		10404	6944		5425	4816	2605	4719	3294	5858	4929	9141	3341
224	4774.5	1218.5		4036.5	3908.5		7176.5	7945.5		5804	4939	2264	5083	2921	6589	4922	10994	3849
228	-400	-1761		7849	3845		6793	6040		6797.67	6685.67	4298.67	5931.67	4297.67	6300.67	6364.67	8991.67	5978.67
232	3444.5	3700.5		4789.5	6470.5		8809.5	8297.5		4469.67	2483.67	2467.67	3667.67	2546.67	5094.67	5302.67	7944.67	4163.67
236	1466	602		7618	4124		8194	9379		4746.33	6781.33	6830.33	6332.33	5483.33	9264.33	6268.33	12083.3	7165.33
240	2171.5	3260.5		6415.5	4252.5		8658.5	8257.5		6450	4015	7539	6002	4079	6675	6066	8532	4158
244	4398	3197		6255	4781		7537	7985		6199	6744	4149	2739	4870	5895	6600	9467	3620
248	4108.5	3292.5		7248.5	7215.5		11878.5	8914.5		5088.67	4207.67	5024.67	2460.67	1290.67	6402.67	5024.67	9669.67	3036.67
252	4077	3437		6576	6543		8113	9443		7785	4309	4597	3893	3316	4759	6872	11854	3811
256	4494.5	4975.5		8642.5	7697.5		9860.5	8434.5		8602	7241	6199	9162	6039	10445	8601	11582	7624
260	2731.5	4108.5		7696.5	8080.5		8481.5	8240.5		6540	4586	5243	6461	2455	7071	9664	9664	3961
264	4582	3301		11181	9515		11870	9243		7881	7304	2899	9386	4356	5415	7785	12398	5237
268	3733.5	1714.5		5446.5	5093.5		10892.5	7897.5		4709	3524	5318	6343	3956	6905	7352	9242	5830
272	4045.5	2507.5		7906.5	6062.5		12247.5	8513.5		5173.33	5285.33	4613.33	4981.33	2499.33	4422.33	6824.33	11292.3	6647.33
276	1755	4671		9299	5118		10613	11125		6210.67	7667.67	5873.67	6385.67	6369.67	7395.67	7058.67	12521.7	7089.67
280	4093	3068		8739	8529		12038	10084		5948	7919	6188	8527	8431	9697	10321	9489	7164
284	4165.5	2995.5		8281.5	4772.5		9482.5	9242.5		5361	4592	4080	7283	5521	7973	7283	11368	9862
288	5198.5	2058.5		8305.5	6350.5		10307.5	10196.5		5787.33	2055.33	3128.33	4362.33	3962.33	4763.33	7005.33	7549.33	3448.33
292	5287	3205		6551	8233		10685	7400		8308	5681	4432	7363	4399	6787	7700	11224	6289
296	3500.5	1002.5		10980.5	5998.5		10372.5	12326.5		6327.67	5269.67	4661.67	5381.67	5413.67	6007.67	8601.67	11981.7	6534.67
300	6215	5783		7672	10941		12671	12110		5313	5025	6178	5457	4047	4449	9286	9286	5969
304	2725	2228		8155	5927		9885	9051		5611.33	5659.33	4762.33	3753.33	2455.33	5756.33	9071.33	11137.3	4105.33
308	2147	3093		6056	5750		10460	9147		7651.67	9285.67	4496.67	6017.67	2540.67	7700.67	9285.67	10599.7	6192.67
312	1898.5	2090.5		8306.5	3916.5		9956.5	10628.5		9050.33	7112.33	6824.33	5766.33	3748.33	9644.33	7897.33	13150.3	5269.33
316	7472.5	5935.5		11636.5	9794.5		13351.5	12918.5		5782.67	5158.67	5686.67	6423.67	5429.67	7064.67	6246.67	9226.67	5605.67
320	5277.5	2507.5		8865.5	8690.5		12646.5	10628.5		5324.33	5388.33	5323.33	3064.33	5643.33	9024.33	7085.33	9504.33	7325.33
324	-320	3044		8315	8586		11501	10124		6413.33	4843.33	5115.33	8030.33	4041.33	8751.33	10561.3	11057.3	6043.33
328	3501	4606		11574	9010		13080	12743		7555.33	7411.33	5489.33	9092.33	5584.33	7443.33	7987.33	12842.3	8019.33
332	1587	2932		6856	4869		11165	8827		6690.67	6706.67	3694.67	6064.67	5777.67	6963.67	9974.67	10984.7	6368.67
336	2875.5	4413.5		7377.5	7376.5		11606.5	10196.5		8719	8367	5083	3736	6220	8368	8079	12211	9488
340	4020.5	4181.5		8170.5	6231.5		14129.5	12366.5		7592	7031	7865	5062	7351	8234	7448	12286	8377
344	9179	7225		14561	13023		16324	14001		7305	7033	4854	8282	4854	7161	7368	11454	6791
348	3101	6272		11975	8338		15243	13593		5681.67	6962.67	5088.67	4575.67	5376.67	7475.67	7586.67	9621.67	3806.67
352	4309.5	2499.5		10924.5	5942.5		10363.5	9915.5		6471	10140	4805	5766	5190	8844	7544	11373	6743
356	1970.5	1458.5		10220.5	7784.5		12782.5	11661.5		9306.67	7143.67	7464.67	8025.67	7992.67	8442.67	9739.67	13199.7	9033.67
360	4694	3829		9259	6407		14770	9692		7706	5863	5704	6232	6905	9548	8971	12495	6087
364	5358	7233		13624	8914		13592	15595		10502.3	8885.33	5329.33	7057.33	7122.33	8917.33	10229.3	14283.3	8403.33
368	2859.5	4957.5		8593.5	7503.5		11092.5	9522.5		6919	5190	4341	8009	7529	10701	8473	11372	8617
372	1683.5	2339.5		10813.5	7752.5		13632.5	10444.5		9889.33	6493.33	7966.33	6829.33	6540.33	7759.33	8335.33	13701.3	7806.33
376	6320.5	4702.5		11205.5	10452.5		13527.5	14249.5		6193.67	6290.67	6273.67	5696.67	6513.67	8389.67	7747.67	13337.7	6048.67
380	6953	5463		11950	10876		13728	13168		7288.67	6519.67	5766.67	7320.67	8745.67	8763.67	12029.7	12654.7	10074.7
384	4741.5	3924.5		10107.5	6566.5		13919.5	11933.5		6958	7663	6125	5339	4602	7567	9152	12532	8302
388	8819.5	6176.5		12374.5	9891.5		15002.5	12935.5		7758.33	7133.33	8271.33	7181.33	5691.33	10642.3	10240.3	11906.3	7581.33
392	9051.5	4726.5		10172.5	9403.5		12222.5	14320.5		8997	7507	6882	7571	5185	8597	9093	12537	8115
396	8315	7994		12431	12030		18774	13632		9541.67	7603.67	6402.67	9605.67	7667.67	9606.67	11207.7	12601.7	10277.7
67.503																			58	59	88	111	61	89	116	103	127
72.006																			60	66	78	88	78	80	121	114	114
76.503																			73	1	113	91	54	89	107	102	137
81.001																			80	57	84	125	53	80	105	116	90
85.496																			75	60	87	105	69	129	130	117	122
89.999																			77	60	118	121	66	100	111	161	109
94.491																			75	67	89	116	83	104	122	132	128
98.983																			60	86	88	118	52	98	104	127	133
103.492																			52	67	107	120	82	110	138	182	129
107.984																			41	71	115	118	52	131	135	150	152
112.487																			53	78	106	162	89	88	146	141	130
116.986																			74	91	112	141	97	99	85	185	161
121.481																			86	24	91	143	85	124	142	172	105
125.981																			70	23	90	138	95	118	145	142	132
130.482																			83	43	132	156	100	102	125	155	147
134.974																			67	108	107	159	76	106	164	158	178
139.475																			101	71	95	148	99	125	165	175	182
143.98																			71	53	122	111	116	135	180	161	175
148.473																			66	82	76	149	102	114	131	182	206
152.987																			99	35	104	133	92	153	135	170	157
157.482																			81	36	99	141	120	130	148	158	161
161.998																			88	51	90	180	92	111	154	200	214
166.486																			81	28	122	157	113	146	150	187	162
170.982																			88	27	70	149	107	141	169	181	152
175.485																			54	53	79	166	91	148	168	197	191
179.983																			70	58	123	174	91	93	197	186	181
184.48																			113	66	119	187	112	103	153	184	188
188.975																			98	94	70	154	106	112	191	159	185
193.476																			90	71	135	173	106	108	171	211	157
197.97																			70	54	98	183	108	147	163	172	224
202.481																			80	127	66	147	118	138	167	167	156
206.976																			84	55	99	192	116	138	143	173	184
211.481																			71	64	125	164	116	148	198	227	182
215.976																			65	91	75	201	112	171	168	191	162
220.47																			76	73	94	135	110	147	181	199	177
224.964																			78	75	29	162	107	135	121	241	181
229.469																			99	22	91	145	97	117	182	188	143
233.978																			96	53	129	177	143	162	155	245	200
238.469																			96	100	100	186	126	77	190	225	222
242.974																			80	73	149	176	134	150	207	240	192
247.472																			56	49	113	180	83	139	177	201	231
251.97																			97	65	104	193	137	145	175	219	232
256.467																			76	78	117	193	105	174	189	188	209
260.974																			90	101	118	193	144	162	190	218	210
265.47																			110	88	81	154	131	112	164	237	208
269.967																			116	90	123	211	154	181	137	220	221
274.46																			133	94	123	190	98	195	159	217	215
278.956																			109	84	89	127	86	162	193	240	215
283.472																			114	121	96	174	140	161	213	252	242
287.967																			59	102	128	181	112	153	208	209	242
292.466																			90	39	118	196	160	155	208	242	235
296.965																			104	69	157	198	113	181	208	282	251
301.462																			113	62	115	210	148	136	239	202	248
305.958																			112	75	114	198	152	171	236	275	235
310.457																			110	76	117	220	169	172	200	269	228
314.951																			98	42	151	203	114	212	231	224	247
319.455																			117	63	137	198	146	177	260	244	253
323.948																			90	73	104	182	161	175	271	269	223
328.447																			96	55	131	193	119	181	214	286	272
332.95																			95	90	125	200	142	173	247	227	281
337.456																			91	68	144	222	156	173	203	263	269
341.957																			89	92	157	194	180	195	261	261	238
346.45																			95	62	145	181	144	135	240	238	281
350.949																			94	127	144	208	160	183	263	274	295
355.445																			103	101	118	207	163	185	231	239	277
359.935																			122	116	138	203	153	199	260	304	250
364.434																			120	118	112	210	150	166	226	289	267
368.93																			94	100	112	183	154	187	234	257	277
373.431																			123	69	118	227	189	185	233	278	272
377.931																			154	89	116	215	156	213	256	285	265
382.434																			97	92	126	207	167	145	223	309	304
386.932																			129	149	167	238	183	213	273	313	280
391.428																			113	88	140	226	170	176	254	309	290
395.923																			113	103	153	213	143	202	282	290	306
400.426																			122	118	136	215	156	219	271	315	279
404.924																			105	109	164	229	177	237	275	283	258
409.42																			131	82	96	240	150	213	266	301	291
413.913																			136	112	180	209	160	228	262	309	267
418.405																			139	95	146	234	169	209	233	317	279
422.898																			143	157	156	240	164	222	229	313	326
427.398																			119	93	114	240	178	197	272	302	308
431.894																			119	50	130	258	171	253	248	299	297
436.393																			124	109	158	226	180	235	297	319	282
440.892																			135	52	135	294	181	218	289	328	320
445.395																			131	88	183	252	183	220	279	323	326
449.886																			146	112	126	275	180	229	293	327	316
454.386																			150	108	123	227	191	162	301	316	329
458.893																			123	143	141	242	148	249	296	293	303
463.402																			154	120	154	250	193	249	315	341	310
467.917																			140	62	190	273	209	234	296	352	331
472.404																			116	85	137	270	181	209	346	365	334
476.901																			100	120	159	290	197	245	316	352	331
481.424																			122	88	153	258	200	256	268	355	309
485.934																			127	120	160	246	199	234	299	338	333
490.427																			142	119	106	274	200	228	287	349	330
494.935																			169	87	131	224	214	256	308	364	348
499.428																			147	127	158	283	202	208	299	337	305
503.929																			161	94	163	242	169	237	252	323	344
508.425																			147	88	158	291	207	240	353	372	353
512.929																			161	90	152	265	197	165	341	364	360
517.432																			151	133	139	235	198	237	306	368	367
521.938																			166	99	162	278	207	274	336	342	348
526.448																			151	132	182	271	206	220	311	359	351
530.936																			121	142	179	282	219	299	288	368	347
535.448																			147	94	163	251	182	233	328	362	389
539.946																			180	118	153	234	207	237	321	376	362
544.441																			173	88	163	300	211	236	356	363	382
548.944																			141	94	185	288	235	291	330	363	378
553.443																			156	126	178	293	218	255	316	336	395
557.94																			121	153	174	281	212	241	340	396	357
562.436																			158	137	174	292	211	230	306	365	385
566.939																			139	122	164	286	221	270	350	368	363
571.433																			168	96	156	295	209	251	350	401	359
575.934																			143	119	153	298	240	272	354	368	374
580.427																			148	110	161	340	234	243	326	395	348
1013.07																												4571	4698	5136
1023.11																												4518	4736	5148
1033.08																												4559	4765	5167
1043.08																												4518	4725	5113
1053.08																												4649	4820	5161
1063.07																												4545	4822	5078
1073.1																												4536	4745	5160
1083.09																												4568	4829	5156
1093.08																												4569	4775	5220
1103.09																												4565	4812	5183
1113.1																												4553	4912	5149
1123.1																												4532	4869	5179
1133.09																												4599	4863	5201
1143.1																												4580	4857	5176
1153.08																												4629	4831	5207
1163.09																												4611	4857	5219
1173.09																												4621	4899	5319
1183.08																												4681	4890	5231
1193.08																												4613	4905	5305
1203.08																												4646	4912	5207
1213.08																												4651	4774	5273
1223.09																												4645	4869	5368
1233.09																												4628	4880	5285
1243.09																												4642	4920	5341
1253.09																												4672	4910	5286
1263.09																												4660	4925	5366
1273.08																												4669	4891	5259
1283.08																												4694	4856	5295
1293.08																												4684	4904	5329
1303.08																												4752	4934	5337
1313.09																												4753	4974	5339
1323.08																												4650	5027	5303
1333.08																												4794	4958	5394
1343.09																												4820	5003	5319
1353.08																												4739	4999	5309
1363.08																												4753	4994	5397
1373.08																												4791	4992	5400
1383.08																												4836	5020	5344
1393.08																												4813	5112	5388
1403.08																												4777	5046	5473
1413.08																												4870	5039	5440
1423.08																												4758	5027	5358
1433.09																												4807	5153	5451
1443.09																												4821	5068	5317
1453.09																												4849	5035	5449
1463.08																												4803	5055	5458
1473.09																												4814	5039	5522
1483.09																												4809	5053	5418
1493.11																												4851	5112	5451
1503.1																												4858	5067	5498
1513.09																												4771	5143	5512
1523.1																												4861	5111	5435
1533.09																												4822	5165	5534
1543.1																												4866	5113	5471
1553.1																												4904	5160	5536
1563.09																												4869	5204	5521
1573.1																												4860	5205	5529
1583.1																												4924	5155	5460
1593.09																												4939	5201	5577
1603.1																												4893	5127	5545
1613.09																												4893	5219	5486
1623.11																												4857	5216	5535
1633.09																												4943	5115	5562
1643.09																												4904	5176	5589
1653.09																												4999	5242	5587
1663.1																												4932	5200	5621
1673.11																												4962	5177	5499
1683.09																												4977	5242	5606
1693.1																												4996	5234	5619
1703.1																												4957	5236	5614
1713.11																												4900	5287	5594
1723.1																												4973	5256	5619
1733.09																												4957	5302	5634
1743.09																												5031	5193	5650
1753.09																												5019	5276	5659
1763.1																												4940	5334	5708
1773.1																												4977	5267	5691
1783.1																												4970	5326	5740
1793.09																												5073	5211	5620
1803.1																												5003	5301	5697
1813.09																												5047	5318	5632
1823.09																												5074	5286	5717
1833.1																												5001	5398	5735
1843.1																												5047	5375	5769
1853.1																												4961	5316	5742
1863.09																												5003	5207	5667
1873.09																												5090	5338	5759
1883.1																												5041	5366	5725
1893.09																												5080	5342	5809
1903.1																												5098	5310	5762
1913.1																												5079	5396	5764
1923.11																												5029	5378	5871
1933.11																												5089	5278	5757
1943.11																												5112	5310	5762
1953.12																												5113	5404	5775
1963.11																												5044	5340	5740
1973.1																												5094	5362	5834
1983.11																												5132	5338	5842
1993.11																												5189	5465	5756
1005.14																															4821	5190	5976
1015.14																															4857	5201	6028
1025.17																															4843	5152	6016
1035.14																															4860	5282	5997
1045.16																															4871	5246	6014
1055.14																															4829	5238	6068
1065.14																															4893	5246	6082
1075.16																															4992	5192	6086
1085.16																															4830	5223	6066
1095.16																															4898	5310	6057
1105.17																															4812	5276	6078
1115.17																															4829	5264	6091
1125.17																															4914	5212	6068
1135.16																															4834	5267	6030
1145.16																															4973	5330	6082
1155.15																															4916	5283	6043
1165.16																															4961	5301	6122
1175.17																															4850	5311	6108
1185.15																															4933	5347	6180
1195.15																															4976	5427	6105
1205.15																															4916	5351	6182
1215.15																															4938	5280	6095
1225.16																															4929	5354	6249
1235.15																															4982	5366	6145
1245.16																															4997	5370	6266
1255.16																															4896	5348	6192
1265.17																															4958	5331	6215
1275.15																															4950	5365	6218
1285.15																															4957	5341	6316
1295.15																															5009	5328	6166
1305.15																															4997	5378	6267
1315.16																															4983	5385	6195
1325.15																															5087	5314	6281
1335.15																															4950	5396	6317
1345.17																															5012	5377	6269
1355.15																															5007	5391	6300
1365.15																															4975	5465	6279
1375.15																															4995	5418	6254
1385.15																															4995	5328	6260
1395.15																															4928	5367	6267
1405.15																															5068	5381	6334
1415.15																															5050	5453	6331
1425.15																															5050	5378	6346
1435.17																															5047	5343	6478
1445.16																															5046	5434	6343
1455.16																															5055	5423	6340
1465.15																															5026	5407	6276
1475.16																															4980	5491	6342
1485.16																															5056	5423	6335
1495.18																															5058	5439	6374
1505.18																															5081	5502	6372
1515.17																															5115	5476	6305
1525.18																															5035	5512	6340
1535.17																															5007	5451	6453
1545.17																															5043	5490	6452
1555.17																															5143	5494	6395
1565.16																															5060	5504	6392
1575.18																															5160	5514	6432
1585.17																															5077	5424	6278
1595.17																															5052	5529	6382
1605.17																															5078	5544	6426
1615.17																															5091	5459	6415
1625.17																															5022	5474	6458
1635.16																															5115	5609	6503
1645.16																															5064	5538	6480
1655.17																															5129	5491	6536
1665.17																															5087	5530	6506
1675.18																															5125	5517	6522
1685.17																															5140	5605	6589
1695.17																															5186	5561	6506
1705.17																															5192	5476	6496
1715.17																															5098	5561	6488
1725.16																															5163	5573	6537
1735.16																															5168	5538	6642
1745.16																															5137	5599	6518
1755.16																															5241	5650	6543
1765.17																															5207	5585	6471
1775.17																															5126	5499	6584
1785.18																															5262	5633	6604
1795.16																															5250	5637	6539
1805.17																															5109	5586	6595
1815.16																															5168	5613	6590
1825.16																															5174	5587	6646
1835.16																															5218	5647	6559
1845.17																															5205	5624	6548
1855.18																															5199	5621	6583
1865.16																															5178	5619	6514
1875.16																															5270	5637	6647
1885.18																															5183	5600	6589
1895.16																															5228	5695	6645
1905.18																															5190	5640	6675
1915.18																															5249	5768	6631
1925.17																															5253	5612	6625
1935.18																															5196	5634	6726
1945.19																															5195	5616	6591
1955.24																															5209	5592	6663
1965.19																															5251	5614	6656
1975.18																															5235	5633	6714
1985.18																															5324	5710	6667
1995.19																															5177	5657	6771
1005.9																																		5502	5696	6098
1015.91																																		5411	5733	6185
1025.93																																		5519	5690	6110
1035.9																																		5523	5760	6163
1045.91																																		5492	5768	6226
1055.9																																		5546	5598	6108
1065.91																																		5489	5728	6130
1075.92																																		5556	5739	6121
1085.92																																		5586	5790	6157
1095.92																																		5677	5799	6155
1105.93																																		5553	5814	6055
1115.94																																		5663	5716	6185
1125.92																																		5576	5801	6052
1135.91																																		5528	5730	6130
1145.92																																		5583	5760	6292
1155.92																																		5541	5756	6177
1165.92																																		5688	5777	6219
1175.93																																		5618	5825	6210
1185.92																																		5696	5835	6241
1195.92																																		5640	5861	6130
1205.92																																		5628	5930	6330
1215.92																																		5616	5775	6286
1225.92																																		5640	5954	6227
1235.93																																		5693	5827	6305
1245.92																																		5632	5890	6281
1255.91																																		5591	5852	6275
1265.93																																		5678	5835	6249
1275.91																																		5715	5888	6214
1285.92																																		5555	5836	6295
1295.92																																		5651	5839	6256
1305.92																																		5722	5912	6398
1315.92																																		5685	5905	6370
1325.92																																		5668	5886	6350
1335.92																																		5701	5857	6262
1345.93																																		5762	5984	6405
1355.92																																		5743	5916	6352
1365.92																																		5742	5983	6338
1375.92																																		5731	5927	6348
1385.92																																		5701	5944	6388
1395.92																																		5693	5923	6373
1405.92																																		5773	5945	6274
1415.92																																		5828	5950	6448
1425.92																																		5727	6021	6460
1435.93																																		5692	6027	6564
1445.92																																		5685	6019	6455
1455.91																																		5703	5977	6439
1465.91																																		5765	6071	6499
1475.91																																		5778	5980	6446
1485.91																																		5722	6002	6543
1495.93																																		5755	6066	6469
1505.94																																		5868	6037	6426
1515.93																																		5752	6039	6454
1525.94																																		5733	6059	6528
1535.93																																		5789	5966	6414
1545.93																																		5820	6067	6487
1555.93																																		5726	5956	6476
1565.93																																		5798	6030	6456
1575.94																																		5795	6017	6492
1585.93																																		5823	5981	6539
1595.93																																		5826	6107	6540
1605.93																																		5845	6010	6587
1615.92																																		5926	5957	6617
1625.93																																		5794	6101	6582
1635.93																																		5847	6099	6494
1645.93																																		5870	6029	6530
1655.93																																		5884	6148	6530
1665.93																																		5855	6079	6532
1675.95																																		5821	6082	6626
1685.93																																		5955	6158	6567
1695.92																																		5871	6045	6522
1705.93																																		5925	6012	6481
1715.92																																		5804	6113	6644
1725.93																																		5854	6108	6602
1735.92																																		5912	6066	6611
1745.93																																		5818	6142	6708
1755.93																																		5913	6082	6551
1765.93																																		5829	6050	6648
1775.92																																		5885	6208	6555
1785.94																																		5845	6133	6665
1795.93																																		5878	6126	6634
1805.93																																		5920	6114	6732
1815.93																																		6001	6168	6731
1825.93																																		5940	6119	6659
1835.92																																		5987	6211	6674
1845.92																																		5972	6120	6674
1855.93																																		5973	6149	6758
1865.93																																		5990	6159	6724
1875.93																																		5912	6156	6742
1885.93																																		5976	6170	6703
1895.93																																		5890	6218	6750
1905.94																																		5899	6199	6647
1915.94																																		5918	6194	6785
1925.94																																		5908	6062	6752
1935.94																																		5907	6246	6789
1945.95																																		5909	6271	6721
1955.99																																		5975	6218	6763
1965.95																																		5984	6236	6769
1975.94																																		5931	6194	6809
1985.94																																		6026	6251	6736
1995.94																																		5961	6259	6861
