# Supplementary material for: Dual engagement of the nucleosomal acidic patches is essential for deposition of histone H2A.Z by SWR1C
Source: eLife. 2024 May 29;13:RP94869. doi: 10.7554/eLife.94869 (PMC11139478; doi:10.7554/eLife.94869)
Supplement: Figure 4—source data 1. [file elife-94869-fig4-data1.xlsx]

## Sheet: Figure 4-Panel E
Swc5 nM	Swc5 AB/AB 0N0 nucleosome				Swc5LDW-3A AB/AB 0N0 nucleosome				Swc5RRKR-4A AB/AB 0N0 nucleosome				Swc5 AB-apm/AB-apm 0N0 nucleosome
0	0.07	0	0.01	-0.05	0.03	0.05	0.09	0.01	-0.03	-0.01	-0.01	-0.01	0.06	0.04	0.09
50	0.24	0.33	0.03	0.19	0.24	0.27	0.3	0.23	-0.01	0.11	0.01	0.05	0.16	0.1	0.02
100	0.45	0.51	0.1	0.43	0.46	0.57	0.47	0.44	0.1	0.24	0.13	0.15	0.37	0.16	0.18
150	0.66	0.62	0.2	0.63	0.61	0.61	0.49	0.59	0.12	0.32	0.26	0.24	0.46	0.2	0.34
200	0.81	0.59	0.46	0.76	0.76	0.78	0.7	0.76	0.19	0.4	0.35	0.34	0.54	0.31	0.4
250	0.85	0.76	0.61	0.88	0.87	0.82	0.75	0.82	0.25	0.51	0.4	0.37	0.65	0.47	0.64
300	0.88	0.83	0.84	0.66	0.89	0.9	0.82	0.92	0.37	0.65	0.39	0.5	0.75	0.47	0.67
350	0.95	0.93	0.91	0.92	0.91	0.95	0.91	0.92	0.43	0.64	0.57	0.51	0.74	0.42	0.71
400	0.95	0.95	0.92	0.93	0.96	0.91	0.92	0.94	0.46	0.68	0.58	0.61	0.79	0.61	0.9
450	0.94	0.96	0.92	0.96	0.97	0.91	0.79	0.96	0.55	0.68	0.58	0.69	0.86	0.69	0.9
500	0.91	0.95	0.94	0.99	0.98	0.99	0.98	0.97	0.64	0.76	0.61	0.72	0.84	0.71	0.9
