# Supplementary material for: Dual engagement of the nucleosomal acidic patches is essential for deposition of histone H2A.Z by SWR1C
Source: eLife. 2024 May 29;13:RP94869. doi: 10.7554/eLife.94869 (PMC11139478; doi:10.7554/eLife.94869)
Supplement: Figure 5—source data 1. [file elife-94869-fig5-data1.xlsx]

## Sheet: Figure 5-Panel B wt
Concentration (nM)	Log(concentration)	Repeat 1	Repeat 2	Repeat 3	Average signal	Standard deviation	Standard error												x_Cooperative model	y_Cooperative model	y_Simple model	y_Quadratic model		Helper x	Helper y	Helper label
5000	3.69897	0.865347	0.81611	0.836976	0.839478	0.0247137	0.0142684												6000	0.98802	0.978098	0.984527		0.1	-0.1	-1
2500	3.39794	1.10397	0.955398	0.94063	1	0.0903448	0.0521606												5400	0.986486	0.975724	0.982837		1	-0.1	0
1250	3.09691	1.05433	0.89644	0.94831	0.966361	0.0804796	0.0464649												4860	0.984758	0.973099	0.980966		10	-0.1	1
625	2.79588	0.844402	0.817231	0.845406	0.83568	0.0159847	0.00922879												4374	0.982812	0.970199	0.978896		100	-0.1	2
312.5	2.49485	0.690752	0.698778	0.733474	0.707668	0.022706	0.0131093												3936.6	0.980623	0.966997	0.976605		1000	-0.1	3
156.25	2.19382	0.546159	0.566915	0.59742	0.570165	0.0257849	0.0148869												3542.94	0.978162	0.963464	0.974072		10000	-0.1	4
78.125	1.89279	0.36675	0.338631	0.388446	0.364609	0.0249764	0.0144201												3188.65	0.975396	0.959569	0.971273		100000	-0.1	5
39.0625	1.59176	0.175374	0.176961	0.217601	0.189978	0.0239347	0.0138187												2869.78	0.972289	0.955277	0.968182
19.5312	1.29073	0.0591941	0.0802816	0.097687	0.0790542	0.0192758	0.0111289												2582.8	0.968803	0.950554	0.96477
9.76562	0.9897	0.0173592	0.025716	0.0357173	0.0262641	0.00919131	0.0053066												2324.52	0.964893	0.94536	0.961007
4.88281	0.68867	0.00149331	-0.000964484	0.0101158	0.00354821	0.00581894	0.00335957												2092.07	0.960514	0.939655	0.956859
2.44141	0.38764	0.00136592	0.0026137	-0.00319371	0.000261974	0.00305705	0.00176499												1882.86	0.955614	0.933397	0.952292
1.2207	0.0866101	2.80742e-05	0.00381619	-0.00193625	0.000636005	0.00292401	0.00168818												1694.58	0.950137	0.92654	0.947268
0.610352	-0.21442	0.00145915	0.000715882	-0.00217503	0	0.00191994	0.00110848												1525.12	0.944024	0.919039	0.941747
																			1372.61	0.937212	0.910845	0.935687
																			1235.35	0.929631	0.901911	0.929043
																			1111.81	0.921213	0.892187	0.92177
																			1000.63	0.911883	0.881626	0.913821
Concentration (nM)	Log(concentration)	Repeat 1	Repeat 2	Repeat 3	Average signal	Standard deviation	Standard error												900.568	0.901566	0.87018	0.905145
5000	3.69897	82385.4	77700.9	79686.1	79924.1	2351.27	1357.51												810.511	0.890187	0.857807	0.895696
2500	3.39794	105088	90952.8	89547.8	95196.3	8595.46	4962.59												729.46	0.877671	0.844465	0.885423
1250	3.09691	100366	85343.6	90278.5	91995.9	7656.88	4420.7												656.514	0.863946	0.830119	0.87428
625	2.79588	80392.6	77807.6	80488.1	79562.8	1520.8	878.033												590.863	0.848946	0.81474	0.86222
312.5	2.49485	65774.3	66537.9	69838.9	67383.7	2160.27	1247.23												531.776	0.832613	0.798308	0.849202
156.25	2.19382	52017.5	53992.3	56894.6	54301.5	2453.2	1416.35												478.599	0.814899	0.78081	0.835187
78.125	1.89279	34948.5	32273.3	37012.7	34744.8	2376.27	1371.94												430.739	0.79577	0.762246	0.820145
39.0625	1.59176	16740.8	16891.8	20758.3	18130.3	2277.16	1314.72												387.665	0.77521	0.742627	0.804049
19.5312	1.29073	5687.43	7693.71	9349.67	7576.94	1833.91	1058.81												348.898	0.753222	0.721981	0.786886
9.76562	0.9897	1707.23	2502.3	3453.83	2554.46	874.467	504.874												314.009	0.729833	0.700347	0.768649
4.88281	0.68867	197.742	-36.0946	1018.09	393.246	553.618	319.632												282.608	0.705094	0.67778	0.749348
2.44141	0.38764	185.622	304.337	-248.184	80.5914	290.849	167.922				Cooperative model								254.347	0.679087	0.654353	0.729001
1.2207	0.0866101	58.338	418.742	-128.549	116.177	278.192	160.614				Parameter	Value	CI lower bound	CI upper bound	Standard deviation	Standard error			228.912	0.651918	0.630152	0.707645
0.610352	-0.21442	194.491	123.776	-151.267	55.667	182.665	105.461				KD (nM)	133.203	107.389	159.016	41.0413	11.8476			206.021	0.623724	0.605278	0.68533
											nH	1.15885	0.929071	1.38864	0.365334	0.105463			185.419	0.594665	0.579847	0.662124
																			166.877	0.564928	0.553985	0.638107
																			150.189	0.534717	0.527827	0.613378
																			135.17	0.504248	0.501516	0.588049
																			121.653	0.473748	0.475196	0.562244
																			109.488	0.443443	0.449014	0.536097
																			98.5392	0.413552	0.423111	0.509749
																			88.6853	0.384286	0.397623	0.483346
																			79.8168	0.355833	0.37268	0.457037
																			71.8351	0.328364	0.348396	0.430966
																			64.6516	0.302022	0.324875	0.405272
																			58.1864	0.276921	0.302205	0.380089
																			52.3678	0.25315	0.28046	0.355537
																			47.131	0.230768	0.259698	0.331723
																			42.4179	0.209809	0.23996	0.308743
																			38.1761	0.190282	0.221273	0.286673
																			34.3585	0.172177	0.203652	0.265577
																			30.9227	0.155464	0.187097	0.245501
																			27.8304	0.140099	0.171598	0.226477
																			25.0473	0.126025	0.157135	0.208522
																			22.5426	0.11318	0.143679	0.191639
																			20.2884	0.101491	0.131196	0.17582
																			18.2595	0.0908864	0.119646	0.161049
																			16.4336	0.0812893	0.108986	0.147299
																			14.7902	0.0726246	0.0991677	0.134535
																			13.3112	0.0648183	0.0901449	0.122719
																			11.9801	0.0577989	0.0818684	0.111808
																			10.7821	0.0514977	0.0742898	0.101756
																			9.70386	0.04585	0.0673612	0.0925135
																			8.73347	0.0407951	0.0610363	0.0840327
																			7.86012	0.0362763	0.05527	0.0762646
																			7.07411	0.0322412	0.0500194	0.0691609
																			6.3667	0.0286416	0.0452438	0.0626743
																			5.73003	0.0254333	0.0409045	0.0567593
											Simple model								5.15703	0.0225761	0.0369652	0.0513722
											Parameter	Value	CI lower bound	CI upper bound	Standard deviation	Standard error			4.64132	0.0200332	0.0333922	0.0464714
											KD (nM)	134.353	104.689	164.018	49.5085	13.7312			4.17719	0.0177716	0.0301536	0.0420177
																			3.75947	0.0157611	0.0272203	0.0379739
																			3.38353	0.0139749	0.0245652	0.0343055
																			3.04517	0.0123885	0.0221631	0.0309802
																			2.74066	0.0109803	0.0199911	0.027968
																			2.46659	0.00973049	0.018028	0.0252411
																			2.21993	0.00862173	0.0162545	0.0227739
																			1.99794	0.00763834	0.0146529	0.0205428
																			1.79814	0.00676634	0.013207	0.0185262
																			1.61833	0.0059933	0.011902	0.0167042
																			1.4565	0.0053081	0.0107245	0.0150587
																			1.31085	0.00470086	0.00966245	0.013573
																			1.17976	0.0041628	0.00870462	0.0122322
																			1.06179	0.0036861	0.00784098	0.0110223
																			0.955607	0.00326381	0.00706242	0.00993091
																			0.860047	0.00288976	0.00636067	0.00894661
																			0.774042	0.00255847	0.00572825	0.00805908
																			0.696638	0.00226507	0.00515838	0.00725896
																			0.626974	0.00200525	0.00464494	0.00653776
																			0.564277	0.00177518	0.00418239	0.0058878
																			0.507849	0.00157146	0.00376572	0.00530211
											Quadratic model
											Parameter	Value	CI lower bound	CI upper bound	Standard deviation	Standard error
											KD (nM)	94.2799	36.4351	152.125	96.5402	26.7754

## Sheet: Figure 5-Panel B rrkr
Concentration (nM)	Log(concentration)	Repeat 1	Repeat 2	Repeat 3	Average signal	Standard deviation	Standard error												x_4PL model	y_4PL model	y_coop 1.1	y_coop 1.2		Helper x	Helper y	Helper label		x_matlab	y_matlab
5000	3.69897	0.946238	1.0652	0.897527	0.969654	0.0862525	0.0497979												6000	1.02108	1.02685	1.12584		0.1	-0.1	-1		6000	0.977502
2500	3.39794	0.989486	1.05361	0.956907	1	0.0492	0.0284056												5400	1.01508	1.01732	1.11531		1	-0.1	0		5400	0.973404
1250	3.09691	0.729882	0.740329	0.7536	0.74127	0.0118871	0.00686303												4860	1.00812	1.00667	1.10341		10	-0.1	1		4860	0.968584
625	2.79588	0.545328	0.488452	0.453607	0.495795	0.0462993	0.0267309												4374	1.00008	0.99479	1.09		100	-0.1	2		4374	0.962923
312.5	2.49485	0.293851	0.262413	0.263427	0.273231	0.017865	0.0103144												3936.6	0.990819	0.981575	1.07493		1000	-0.1	3		3936.6	0.956289
156.25	2.19382	0.132713	0.125801	0.119003	0.125839	0.00685538	0.00395795												3542.94	0.980171	0.966921	1.05808		10000	-0.1	4		3542.94	0.948531
78.125	1.89279	0.0541195	0.0524649	0.0407758	0.0491201	0.00727351	0.00419936												3188.65	0.967973	0.95073	1.03929		100000	-0.1	5		3188.65	0.939483
39.0625	1.59176	0.0258828	0.0093407	0.0221067	0.01911	0.00866862	0.00500483												2869.78	0.95405	0.93291	1.01844						2869.78	0.928963
19.5312	1.29073	0.00596854	0.00143906	0.0183734	0.00859368	0.00876709	0.00506168												2582.8	0.938227	0.913379	0.995423						2582.8	0.916777
9.76562	0.9897	0.0168486	0.00716529	0.00779271	0.0106022	0.00541865	0.00312846												2324.52	0.92033	0.892075	0.970144						2324.52	0.90272
4.88281	0.68867	0.00847362	0.0150015	0.00679802	0.010091	0.00433432	0.00250242												2092.07	0.900197	0.868954	0.942548						2092.07	0.886582
2.44141	0.38764	0.0118433	0.00430789	0.0137828	0.00997799	0.0050053	0.00288981												1882.86	0.877688	0.843999	0.91262						1882.86	0.868158
1.2207	0.0866101	0.00417433	-0.00168245	-0.00249188	2.89121e-19	0.00363766	0.00210021												1694.58	0.852695	0.817227	0.880394						1694.58	0.847256
0.610352	-0.21442	0.0165757	0.00358037	0.0211671	0.0137744	0.00912188	0.00526652												1525.12	0.825152	0.788687	0.845955						1525.12	0.823713
																			1372.61	0.795054	0.75847	0.809452						1372.61	0.79741
																			1235.35	0.762463	0.726709	0.771093						1235.35	0.768286
																			1111.81	0.72752	0.693577	0.731149						1111.81	0.736359
																			1000.63	0.690452	0.659288	0.689946						1000.63	0.701741
Concentration (nM)	Log(concentration)	Repeat 1	Repeat 2	Repeat 3	Average signal	Standard deviation	Standard error												900.568	0.651569	0.62409	0.647856						900.568	0.664648
5000	3.69897	37400.6	42138.3	35460.7	38333.2	3435.07	1983.24												810.511	0.611262	0.588264	0.605286						810.511	0.625404
2500	3.39794	39123	41676.7	37825.5	39541.7	1959.42	1131.27												729.46	0.569987	0.552108	0.562664						729.46	0.584439
1250	3.09691	28784.1	29200.2	29728.7	29237.7	473.412	273.325												656.514	0.528247	0.515934	0.520416						656.514	0.542273
625	2.79588	21434.1	19169	17781.3	19461.4	1843.9	1064.58												590.863	0.486568	0.480054	0.478957						590.863	0.499492
312.5	2.49485	11418.9	10166.8	10207.2	10597.7	711.487	410.777												531.776	0.445473	0.444768	0.438668						531.776	0.456719
156.25	2.19382	5001.45	4726.16	4455.42	4727.68	273.02	157.628												478.599	0.405457	0.41036	0.399889						478.599	0.414575
78.125	1.89279	1871.4	1805.51	1339.98	1672.3	289.673	167.243												430.739	0.366962	0.377081	0.362905						430.739	0.373645
39.0625	1.59176	746.856	88.0554	596.468	477.126	345.234	199.321												387.665	0.33036	0.34515	0.327938						387.665	0.334447
19.5312	1.29073	-46.2433	-226.633	447.79	58.3047	349.155	201.585												348.898	0.295944	0.314747	0.295153						348.898	0.297409
9.76562	0.9897	387.064	1.41838	26.4059	138.296	215.801	124.593												314.009	0.263919	0.286006	0.264651						314.009	0.262853
4.88281	0.68867	53.5234	313.5	-13.2087	117.938	172.617	99.6606				Cooperative model								282.608	0.234409	0.259025	0.236477						282.608	0.230992
2.44141	0.38764	187.722	-112.38	264.966	113.436	199.34	115.089				Parameter	Value	CI lower bound	CI upper bound	Standard deviation	Standard error			254.347	0.207458	0.233857	0.210627						254.347	0.201935
1.2207	0.0866101	-117.699	-350.949	-383.185	-283.944	144.872	83.6421				KD (nM)	591.6	530.2	653.1	102.556	28.4438			228.912	0.183046	0.210523	0.187054						228.912	0.175698
0.610352	-0.21442	376.196	-141.354	559.049	264.63	363.285	209.743				nH	1.628	1.385	1.872	0.406384	0.112711			206.021	0.161097	0.189008	0.165678						206.021	0.152219
																			185.419	0.141494	0.169275	0.146391						185.419	0.131378
																			166.877	0.124091	0.151259	0.12907						166.877	0.11301
																			150.189	0.108723	0.134883	0.113577						150.189	0.0969239
																			135.17	0.0952143	0.120055	0.0997705						135.17	0.0829132
																			121.653	0.0833897	0.106678	0.0875071						121.653	0.0707691
																			109.488	0.0730762	0.0946465	0.0766461						109.488	0.0602868
																			98.5392	0.064109	0.0838578	0.0670519						98.5392	0.0512715
																			88.6853	0.0563337	0.0742081	0.058596						88.6853	0.0435418
																			79.8168	0.0496078	0.0655971	0.0511583						79.8168	0.0369321
																			71.8351	0.0438016	0.0579289	0.0446277						71.8351	0.031293
																			64.6516	0.0387982	0.0511129	0.0389026						64.6516	0.0264912
																			58.1864	0.0344932	0.0450641	0.0338904						58.1864	0.0224091
																			52.3678	0.030794	0.0397041	0.0295076						52.3678	0.0189439
																			47.131	0.0276189	0.0349604	0.0256791						47.131	0.0160057
																			42.4179	0.0248963	0.0307671	0.0223378						42.4179	0.0135169
																			38.1761	0.0225637	0.0270639	0.0194241						38.1761	0.0114107
																			34.3585	0.0205666	0.0237966	0.016885						34.3585	0.00962941
																			30.9227	0.0188578	0.020916	0.0146737						30.9227	0.00812393
																			27.8304	0.0173965	0.0183782	0.0127489						27.8304	0.00685219
																			25.0473	0.0161473	0.0161436	0.0110742						25.0473	0.00577837
																			22.5426	0.0150799	0.0141772	0.00961769						22.5426	0.00487201
																			20.2884	0.0141681	0.0124476	0.00835141						20.2884	0.00410722
																			18.2595	0.0133895	0.0109269	0.00725084						18.2595	0.00346208
																			16.4336	0.0127247	0.00959029	0.00629453						16.4336	0.00291797
																			14.7902	0.0121573	0.00841594	0.00546378						14.7902	0.00245916
																			13.3112	0.011673	0.00738441	0.00474223						13.3112	0.00207235
																			11.9801	0.0112598	0.00647857	0.00411564						11.9801	0.00174627
																			10.7821	0.0109072	0.00568326	0.0035716						10.7821	0.00147142
																			9.70386	0.0106064	0.00498515	0.00309928						9.70386	0.00123978
																			8.73347	0.0103498	0.00437244	0.00268929						8.73347	0.00104457
																			7.86012	0.0101309	0.00383478	0.00233343						7.86012	0.000880065
																			7.07411	0.00994427	0.00336303	0.00202457						7.07411	0.00074145
																			6.3667	0.00978507	0.00294915	0.00175654						6.3667	0.000624654
																			5.73003	0.00964929	0.00258609	0.00152395						5.73003	0.000526246
																			5.15703	0.00953351	0.00226764	0.00132212						5.15703	0.000443335
											4PL								4.64132	0.00943477	0.00198832	0.00114699						4.64132	0.000373481
											Parameter	Value	CI lower bound	CI upper bound	Standard deviation	Standard error			4.17719	0.00935057	0.00174336	0.000995047						4.17719	0.000314631
											a	0.00886335			0.01043	0.01043			3.75947	0.00927878	0.00152853	0.000863214						3.75947	0.000265051
											b	1.51369			0.1424	0.1424			3.38353	0.00921756	0.00134015	0.000748837						3.38353	0.000223282
											c	664.554			52.29	52.29			3.04517	0.00916536	0.00117495	0.000649607						3.04517	0.000188095
											d	1.05729			0.03741	0.03741			2.74066	0.00912085	0.0010301	0.00056352						2.74066	0.000158451
																			2.46659	0.0090829	0.000903098	0.000488837						2.46659	0.000133479
																			2.21993	0.00905054	0.000791739	0.000424048						2.21993	0.000112442
																			1.99794	0.00902295	0.000694102	0.000367843						1.99794	9.47206e-05
																			1.79814	0.00899942	0.0006085	0.000319086						1.79814	7.97917e-05
																			1.61833	0.00897937	0.000533449	0.00027679						1.61833	6.72156e-05
																			1.4565	0.00896227	0.000467652	0.000240099						1.4565	5.66215e-05
																			1.31085	0.00894769	0.000409966	0.000208271						1.31085	4.76971e-05
																			1.17976	0.00893525	0.000359394	0.000180662						1.17976	4.01793e-05
																			1.06179	0.00892465	0.000315059	0.000156712						1.06179	3.38463e-05
																			0.955607	0.00891562	0.000276192	0.000135937						0.955607	2.85116e-05
																			0.860047	0.00890791	0.000242118	0.000117916						0.860047	2.40176e-05
																			0.774042	0.00890134	0.000212247	0.000102283						0.774042	2.0232e-05
																			0.696638	0.00889574	0.000186061	8.87232e-05						0.696638	1.7043e-05
																			0.626974	0.00889097	0.000163105	7.69607e-05						0.626974	1.43567e-05
																			0.564277	0.0088869	0.000142981	6.67575e-05						0.564277	1.20938e-05
																			0.507849	0.00888343	0.00012534	5.79069e-05						0.507849	1.01875e-05
											Cooperative model (1.1x)
											Parameter	Value
											KD (nM)	725
											nH	1.25
											Cooperative model (1.2x)
											Parameter	Value
											KD (nM)	800
											nH	1.35
