# Supplementary material for: Dual engagement of the nucleosomal acidic patches is essential for deposition of histone H2A.Z by SWR1C
Source: eLife. 2024 May 29;13:RP94869. doi: 10.7554/eLife.94869 (PMC11139478; doi:10.7554/eLife.94869)
Supplement: Figure 6—source data 1. [file elife-94869-fig6-data1.xlsx]

## Sheet: Figure 6-Panel B
Swc5 (uM)	H2B-OG AB/AB 77N0 nucleosome			H4-OG AB/AB 77N0 nucleosome			H2B-OG AB-apm/AB-apm nucleosome
0.5	0.96	0.9	0.91	1.03	0.98	0.95	1.03	1.01	0.98
1	0.91	0.87	0.84	1.02	0.96	0.97	0.99	0.96	1.08
2	0.82	0.83	0.82	0.94	0.92	0.91	0.99	0.96	1.08
4	0.78	0.77	0.73	0.95	0.93	1	1.05	1.01	1.02
8	0.69	0.7	0.68	0.91	0.89	0.86	1.01	1.04	1.01
12	0.66	0.72	0.65	0.94	0.89	0.92	1.01	1.02	1.04

## Sheet: Figure 6-Panel C
Swc5LDW-3A (uM)	H2B-OG AB/AB 77N0 nucleosome			H4-OG AB/AB 77N0 nucleosome
0.5	0.95	0.88	0.89	1.03	1.01	1.03
1	1.54	0.94	0.93	1.02	0.99	1.02
2	0.91	0.87	0.87	0.94	0.97	1
4	0.8	0.8	0.89	0.93	0.97	0.98
8	0.74	0.72	0.87	0.97	0.97	1
12	0.69	0.76	0.73	0.99	1.02	1.02

## Sheet: Figure 6-Panel D
Swc5RRKR-4A (uM)	H2B-OG AB/AB 77N0 nucleosome			H4-OG AB/AB 77N0 nucleosome
1	0.963326	0.91267	1.01026	0.95	0.9	0.99
2	0.914987	0.885254	0.898936	0.96	1.02	0.95
4	0.871849	0.961227	0.818697	0.9	0.82	0.93
8	0.840951	0.57816321*	0.89515	0.95	0.9	0.91
12	0.828582	0.838576	0.763892	0.89	0.93	0.93
